# Supplementary material for: Cerebellar Purkinje cell activity modulates aggressive behavior
Source: eLife. 2020 Apr 28;9:e53229. doi: 10.7554/eLife.53229 (PMC7202893; doi:10.7554/eLife.53229)
Supplement: Figure 1—source data 1. [file elife-53229-fig1-data1.xlsx]

## Sheet: Fig1B In Vitro ChR2
Cell ID		Laser	Stimulation	Firing
		voltage	frequency	frequency (Hz)
2013_11_06SJ0		1	2	60
		2	2	112.6
		3	2	55.6
		3	2	92.8
		4	2	57.2
		5	2	87.2
		1	5	98
		2	5	112
		3	5	60
		3	5	110
		4	5	62.5
		5	5	94.5
		1	10	87
		2	10	112
		3	10	81
		3	10	133
		4	10	86
		5	10	128
		1	20	62
		2	20	138
		3	20	110
		3	20	140
		4	20	130
		5	20	160
		1	50	105
		2	50	150
		3	50	165
		3	50	200
		4	50	200
		5	50	240
		1	100	60
		2	100	180
		3	100	210
		3	100	240
		4	100	260
		5	100	260
2013_11_06SJ2		2	2	71.8
		3	2	69.6
		3	2	69
		4	2	75.8
		4	2	74
		5	2	74.6
		5	2	72.4
		2	5	43
		3	5	93
		3	5	82.5
		4	5	89
		4	5	88
		5	5	91.5
		5	5	91.5
		2	10	79
		3	10	126
		3	10	110
		4	10	124
		4	10	114
		5	10	129
		5	10	122
		2	20	92
		3	20	180
		3	20	140
		4	20	194
		4	20	176
		5	20	210
		5	20	212
		2	50	130
		3	50	260
		3	50	210
		4	50	280
		4	50	270
		5	50	320
		5	50	290
		2	100	170
		3	100	320
		3	100	260
		4	100	350
		4	100	320
		5	100	370
		5	100	370
2013_11_06SJ6		2	50	83
		2	50	81
		3	50	160
		3	50	162
		4	50	197
		4	50	197
		2	100	116
		2	100	112
		3	100	204
		3	100	206
		4	100	242
		4	100	240
2013_11_08SJ2		1.4	50	8.8
		1.6	50	58.4
		1.8	50	63.2
		2	50	61.2
		2.2	50	44
		2.4	50	31.5
		2.6	50	45.7
		2.8	50	56.4
		3	50	55.1
		1.4	100	60.8
		1.6	100	65.6
		1.8	100	72
		2	100	77.4
		2.2	100	77.8
		2.4	100	80.6
		2.6	100	77
		2.8	100	72.8
		3	100	76.6
2013_11_08SJ4		1.8	20	80.6
		2	20	64.2
		1.6	50	38.5
		1.8	50	97
		2	50	67.5
		2.2	50	72.5
		2.2	50	83
		2.4	50	38
		2.4	50	60.5
		2.6	50	105.5
		2.8	50	72.5
		3	50	77.5
		1.8	100	70
		2	100	49
		2.2	100	82
		2.2	100	120
		2.4	100	60
		2.6	100	94
		2.8	100	79
		3	100	107
2013_11_26SJ7		1.6	50	54.7333
		1.6	50	49.8667
		1.8	50	55.8833
		2	50	57.1667
		3	50	87.15
		3.5	50	101.633
		4	50	89.3833
		4.5	50	101.55
		5	50	106.567

## Sheet: Fig1C In Vitro Halo
Cell ID		LED	Firing
		voltage	frequency (Hz)
2014_8_8SJ2		0	47.8
		0	47.8
		5	46.7
		5	46.8
		10	34.9
		10	26.6
		10	29.8
		15	17.7
		15	7.2
		20	2.7
		20	0
		25	0.1
		25	8.8
		30	0
		30	0
		30	0.1
2014_8_27SJ5		0	40
		0	24.7
		10	0.5
		10	0.2
		10	0.1
		20	0
		20	0
		20	0
		30	0
		30	0
		30	0
		40	0
		40	0
		40	0
		50	0
		50	0
2014_8_27SJ6		0	50.2
		5	47.3
		10	17.1
		15	44.3
		20	19.6
		25	0.3
		30	2.3
2014_8_8SJ0		0	13
		10	0
		20	0
		30	0
		40	0
		50	0
		60	0
		70	0
		80	0
		90	0
		100	0

## Sheet: Fig1E In Vivo ChR2
			35.864	8.104	27.16	21.656	24.048	35.16
		Date	170614	170820	170820	170820	170820	170820
		Recording	Rec6	Rec4	REc6	rec8	rec8	rec8
		Channel	ch1	ch5	ch9	ch2	ch4	ch5	Normalized
Time (s)	Avg Firing	SEM firing							Avg Firing	SEM firing	InVivoChR2_1	InVivoChR2_2	InVivoChR2_3	InVivoChR2_4	InVivoChR2_5	InVivoChR2_6
0	18.1467	5.22323	27.2	19.64	6.2	35.48	1.12	19.24	0.940387	0.373294	0.758421	2.42349	0.228277	1.63835	0.0465735	0.547213
5	14.3867	4.02806	26.12	18.96	8.68	23.2	0.84	8.52	0.789338	0.34523	0.728307	2.33959	0.319588	1.0713	0.0349301	0.242321
10	9.95333	3.3246	23.64	9.28	10.28	12.72	0.12	3.68	0.479965	0.169589	0.659157	1.14511	0.378498	0.587366	0.00499002	0.104664
15	9.52	3.85436	26.92	3.4	12.32	7.96	0.36	6.16	0.363584	0.102967	0.750613	0.419546	0.453608	0.367566	0.0149701	0.175199
20	11.92	4.91703	34.4	1.44	14.44	8.44	2.48	10.32	0.409151	0.126295	0.959179	0.17769	0.531664	0.38973	0.103127	0.293515
25	11.7133	4.00332	29.4	0.48	12.4	9.6	5.72	12.68	0.396223	0.104108	0.819764	0.05923	0.456554	0.443295	0.237858	0.360637
30	18.4467	3.60707	31.36	7.64	13.72	15.72	15.52	26.72	0.742257	0.0642508	0.874414	0.942744	0.505155	0.725896	0.645376	0.759954
35	22.7667	4.20483	37.2	7.92	22.36	19.4	18.48	31.24	0.898436	0.040057	1.03725	0.977295	0.82327	0.895826	0.768463	0.88851
40	24.4	3.89801	30.64	7.8	25.92	23.96	22.12	35.96	0.970024	0.0353939	0.854339	0.962488	0.954345	1.10639	0.919827	1.02275
45	25.2333	4.20878	35.28	8.32	27.24	21.32	23.04	36.2	0.997577	0.0112866	0.983716	1.02665	1.00295	0.984485	0.958084	1.02958
50	26.8467	4.53306	38.08	7.96	29.16	22	26.8	37.08	1.05043	0.0188207	1.06179	0.982231	1.07364	1.01588	1.11444	1.05461
55	27.4133	4.42469	38.12	8.52	31.12	21.6	29.8	35.32	1.08353	0.0379575	1.0629	1.05133	1.1458	0.997414	1.23919	1.00455
60	58.5733	4.97402	58.12	75.36	70.4	43.16	51.32	53.08	3.19141	1.23171	1.62057	9.29911	2.59205	1.99298	2.13407	1.50967
65	59.3933	4.51649	63.04	77.04	61.24	43.48	54.28	57.28	3.2355	1.2585	1.75775	9.50642	2.25479	2.00776	2.25715	1.62912
70	59.14	4.44275	65.76	76.52	55.2	46.88	50.24	60.24	3.21258	1.24781	1.83359	9.44225	2.0324	2.16476	2.08916	1.71331
75	55.8933	4.68646	65.8	71.64	51.72	45.52	42.4	58.28	3.01695	1.16622	1.83471	8.84008	1.90427	2.10196	1.76314	1.65757
80	56.98	4.07898	64.56	67.52	50.92	55.36	40.88	62.64	3.00741	1.07244	1.80013	8.33169	1.87482	2.55634	1.69993	1.78157
85	54.9067	3.95398	65.36	61.8	45.72	52.2	42.04	62.32	2.84379	0.96253	1.82244	7.62586	1.68336	2.41042	1.74817	1.77247
90	53.7867	4.84351	63.24	59.76	46	58.24	33.16	62.32	2.77864	0.936415	1.76333	7.37414	1.69367	2.68932	1.37891	1.77247
95	53.4667	5.09175	60.32	54.2	47.84	61.04	31.44	65.96	2.6889	0.825706	1.68191	6.68806	1.76141	2.81862	1.30739	1.876
100	51.6733	5.23512	60	47.52	45.68	61.64	30.76	64.44	2.52947	0.700446	1.67299	5.86377	1.68189	2.84632	1.27911	1.83276
105	49.6133	6.45317	58.64	39.08	43.92	66.88	26.2	62.96	2.34048	0.565888	1.63507	4.82231	1.61708	3.08829	1.08949	1.79067
110	47.9667	7.05789	58.68	34.08	44.36	64.52	22.44	63.72	2.19992	0.483839	1.63618	4.20533	1.63328	2.97931	0.933134	1.81229
115	46.5067	8.22993	57	25.08	41.04	71.28	22.52	62.12	2.03164	0.385297	1.58934	3.09477	1.51105	3.29147	0.93646	1.76678
120	22.6467	6.66781	37.2	22.12	6.96	43.4	1.64	24.56	1.1323	0.42458	1.03725	2.72952	0.256259	2.00406	0.0681969	0.698521
125	18.3533	5.14893	35.64	22.4	10.88	27.72	0.96	12.52	0.972405	0.403381	0.993754	2.76407	0.400589	1.28001	0.0399202	0.356086
130	13.3867	4.32266	31.16	12.72	12.68	17.6	0.48	5.68	0.649919	0.230152	0.868838	1.5696	0.466863	0.812708	0.0199601	0.161547
135	12.4733	4.81195	34.48	6.04	14.92	10.36	0.52	8.52	0.499732	0.137988	0.96141	0.745311	0.549337	0.478389	0.0216234	0.242321
140	15.12	6.04076	42.6	2.64	17.68	12.32	2.24	13.24	0.533858	0.153284	1.18782	0.325765	0.650957	0.568895	0.093147	0.376564
145	15.5467	5.21886	38.2	1	15.84	14	6.36	17.88	0.53187	0.134045	1.06513	0.123396	0.583211	0.646472	0.264471	0.508532
150	17.7	5.43687	40.36	0.92	17.2	14.28	10.48	22.96	0.603397	0.135032	1.12536	0.113524	0.633284	0.659402	0.435795	0.653015
155	20.8733	6.18138	46.24	0.8	20.36	17.8	13.36	26.68	0.71233	0.158069	1.28932	0.0987167	0.749632	0.821943	0.555556	0.758817
160	21.74	5.53272	40.84	0.48	22.6	20.68	15.96	29.88	0.749753	0.152145	1.13875	0.05923	0.832106	0.954932	0.663673	0.849829
165	23.0867	5.61287	41.44	0.96	23.72	21.12	18.52	32.76	0.804066	0.14664	1.15548	0.11846	0.873343	0.975249	0.770126	0.931741
170	24.4667	5.69776	41.12	0.4	27	20.88	23.12	34.28	0.848428	0.162356	1.14655	0.0493583	0.994109	0.964167	0.961411	0.974972
175	25.64	5.58817	40.96	1.28	30.2	21.48	25.88	34.04	0.908028	0.152524	1.14209	0.157947	1.11193	0.991873	1.07618	0.968146
180	49.48	4.1434	56.32	55.28	62.32	35.56	41.56	45.84	2.56004	0.862581	1.57038	6.82132	2.29455	1.64204	1.72821	1.30375
185	51.86	4.14956	60.24	62.12	58.36	36.04	45.6	48.8	2.74035	0.99046	1.67968	7.66535	2.14875	1.6642	1.89621	1.38794
190	52.8333	4.03826	63.44	63.56	53.08	39.28	44.04	53.6	2.78932	1.01239	1.7689	7.84304	1.95434	1.81382	1.83134	1.52446
195	51.4333	3.91168	64.88	59.2	51.2	38.36	44.68	50.28	2.67642	0.928172	1.80906	7.30503	1.88513	1.77133	1.85795	1.43003
200	51.74	3.24881	63.24	56.64	51.28	42.92	42.84	53.52	2.65434	0.869243	1.76333	6.98914	1.88807	1.9819	1.78144	1.52218
205	48.36	4.20859	65.88	53.16	45.2	36.88	40.64	48.4	2.47173	0.819924	1.83694	6.55972	1.66421	1.70299	1.68995	1.37656

## Sheet: Fig1F In Vivo Halo
			54.528	55.4267	48.95	53.64	73.192	41.008			0.0241038	1	1	1	1	1
		Date	170139	170201	170818	170818	170818	170818			170139	170201	170818	170818	170818	170818
		Recording	rec1	rec3	rec1	rec2	rec3	rec3			rec1	rec3	rec1	rec2	rec3	rec3
		Channel	ch1	ch1	ch15	ch1	ch5	ch8	Normalized		ch1	ch1	ch15	ch1	ch5	ch8
Time (s)	Avg Firing	SEM firing							Avg Firing	SEM firing
0	37.1233	2.2032	40.24	38.6	35.7	36.88	43.64	27.68	0.68708	0.0207035	0.737969	0.696416	0.729316	0.687547	0.59624	0.67499
5	43.1756	3.08215	46.88	49.7333	40.2	42.04	50.08	30.12	0.796789	0.0323426	0.859742	0.897282	0.821246	0.783743	0.684228	0.734491
10	44.5444	3.10246	48.04	46.0667	43.8	44.32	54.04	31	0.821244	0.0259757	0.881015	0.831128	0.894791	0.826249	0.738332	0.75595
15	45.9572	3.23199	48.44	45.9333	46.05	47.32	56.2	31.8	0.847218	0.0279614	0.888351	0.828723	0.940756	0.882177	0.767843	0.775458
20	46.34	3.34418	48.88	43.8	48.2	47.8	57.16	32.2	0.854772	0.0338545	0.89642	0.790233	0.984678	0.891126	0.78096	0.785213
25	48.2483	3.86232	46.76	41.8	51.85	48.4	64.16	36.52	0.890067	0.0402011	0.857541	0.75415	1.05924	0.902312	0.876599	0.890558
30	51.1128	4.38253	54.56	42.0667	49.65	48.32	70.6	41.48	0.941794	0.0404971	1.00059	0.758961	1.0143	0.90082	0.964586	1.01151
35	50.9189	4.56789	54.88	42.5333	50.1	48.04	70.76	39.2	0.935935	0.0383089	1.00646	0.76738	1.02349	0.8956	0.966772	0.955911
40	52.8844	4.13423	54.36	51.0667	50	48.24	71.76	41.88	0.973456	0.0211341	0.996919	0.921338	1.02145	0.899329	0.980435	1.02126
45	55.0544	4.61948	53.4	61.0667	47.7	53.28	73.76	41.12	1.00989	0.0191143	0.979313	1.10176	0.974464	0.993289	1.00776	1.00273
50	56.42	4.65899	54.84	61	48.2	59.08	74.28	41.12	1.03499	0.0212482	1.00572	1.10055	0.984678	1.10142	1.01487	1.00273
55	57.0094	4.72578	55.16	61.4667	48.75	59.56	75.4	41.72	1.04573	0.0207135	1.01159	1.10897	0.995914	1.11037	1.03017	1.01736
60	2.49333	2.46139	0	14.8	0	0	0.08	0.08	0.0450106	0.044403	0	0.267019	0	0	0.00109302	0.00195084
65	2.35556	2.35556	0	14.1333	0	0	0	0	0.0424986	0.0424986	0	0.254992	0	0	0	0
70	1.97778	1.97778	0	11.8667	0	0	0	0	0.0356828	0.0356828	0	0.214097	0	0	0	0
75	2.23333	2.23333	0	13.4	0	0	0	0	0.0402935	0.0402935	0	0.241761	0	0	0	0
80	2.77778	2.77778	0	16.6667	0	0	0	0	0.0501163	0.0501163	0	0.300698	0	0	0	0
85	3.7	3.7	0	22.2	0	0	0	0	0.0667549	0.0667549	0	0.400529	0	0	0	0
90	4.45556	4.45556	0	26.7333	0	0	0	0	0.0803865	0.0803865	0	0.482319	0	0	0	0
95	5.12222	5.12222	0	30.7333	0	0	0	0	0.0924144	0.0924144	0	0.554486	0	0	0	0
100	5.35111	5.34312	0	32.0667	0	0	0	0.04	0.0965863	0.0963913	0	0.578542	0	0	0	0.000975419
105	5.92222	5.92222	0	35.5333	0	0	0	0	0.106848	0.106848	0	0.641087	0	0	0	0
110	6.31111	6.31111	0	37.8667	0	0	0	0	0.113864	0.113864	0	0.683185	0	0	0	0
115	6.46444	6.44047	0.12	38.6667	0	0	0	0	0.116637	0.116197	0.0022007	0.697618	0	0	0	0
120	47.5456	3.4191	47.04	58.3333	41.1	47.08	55.52	36.2	0.87896	0.0393368	0.862676	1.05244	0.839632	0.877703	0.758553	0.882755
125	54.2244	5.59677	57.8	74.6667	43.2	51.64	61.8	36.24	0.996744	0.0768041	1.06001	1.34713	0.882533	0.962714	0.844355	0.88373
130	56.4417	5.57199	60.12	74	43.45	55.44	67.2	38.44	1.03573	0.0681967	1.10255	1.3351	0.88764	1.03356	0.918133	0.937378
135	57.4894	5.18672	60.84	70.2667	44.55	59.08	70.12	40.08	1.05507	0.0540145	1.11576	1.26774	0.910112	1.10142	0.958028	0.97737
140	58.2872	5.16574	61.6	69.3333	46.95	60	72.12	39.72	1.06871	0.047741	1.12969	1.2509	0.959142	1.11857	0.985354	0.968591
145	58.405	4.78117	59.28	66.4	50.55	61.32	72.92	39.96	1.07195	0.0355725	1.08715	1.19798	1.03269	1.14318	0.996284	0.974444
150	58.1428	4.6869	57.6	66.0667	50.15	60.88	73.24	40.92	1.06772	0.0323188	1.05634	1.19197	1.02451	1.13497	1.00066	0.997854
155	57.4983	5.00989	56.36	65.8	50.15	60.04	73.92	38.72	1.05312	0.0352479	1.0336	1.18715	1.02451	1.11931	1.00995	0.944206
160	56.9789	4.78391	55.08	62.1333	48.9	60.48	74.64	40.64	1.04474	0.0254743	1.01012	1.121	0.998979	1.12752	1.01978	0.991026
165	57.4561	5.11221	54.32	63.8667	48.75	60.52	76.6	40.68	1.05187	0.0293035	0.996185	1.15227	0.995914	1.12826	1.04656	0.992002
170	58.13	5.39207	54.36	65	48.5	61.72	78.32	40.88	1.063	0.0335255	0.996919	1.17272	0.990807	1.15063	1.07006	0.996879
175	58.9561	5.64278	56	66.2667	48.95	62.24	79.88	40.4	1.07657	0.0356232	1.027	1.19557	1	1.16033	1.09138	0.985174
180	26.7017	3.52515	22.84	40.2	21.85	25.2	33.56	16.56	0.487111	0.0486814	0.418867	0.725283	0.446374	0.469799	0.45852	0.403824
185	16.2811	3.64056	11.76	33.4667	12.5	13.36	17.84	8.76	0.296877	0.0617958	0.215669	0.603801	0.255363	0.249068	0.243742	0.213617
190	12.8144	1.27176	11.88	12.0667	12.5	13	18.48	8.96	0.234046	0.00738034	0.21787	0.217705	0.255363	0.242356	0.252487	0.218494
195	13.2789	1.34511	12.32	13.7333	12.5	13.2	19.04	8.88	0.241974	0.00698469	0.225939	0.247775	0.255363	0.246085	0.260138	0.216543
200	13.32	1.51747	11.72	14.6	12.6	13.16	19.56	8.28	0.241708	0.0110802	0.214935	0.263411	0.257406	0.245339	0.267242	0.201912
205	14.3439	1.79209	12.44	19.7333	12.45	13.24	19.52	8.68	0.260617	0.0206722	0.22814	0.356026	0.254341	0.246831	0.266696	0.211666

## Sheet: Fig1H DCN ChR2
	Normalized
Time (s)	ChR2 Avg	ChR2 SEM	DCNChR2Cell1	DCNChR2Cell2	DCNChR2Cell3	DCNChR2Cell4
-40	1.10578	0.0327723	1.07435	1.20407	1.07358	1.0711
-39.5	1.07249	0.0673318	1.00346	1.27332	1.02426	0.988942
-39	1.06644	0.0844032	0.987098	1.31948	0.973294	0.985899
-38.5	1.09894	0.0852291	1.09072	1.34256	0.976582	0.985899
-38	1.08769	0.0961166	1.11798	1.34448	0.981514	0.906783
-37.5	1.09421	0.107438	1.16707	1.35987	0.976582	0.873312
-37	1.1015	0.112631	1.19433	1.37141	0.970006	0.870269
-36.5	1.09273	0.0974776	1.09072	1.36756	0.981514	0.931127
-36	1.13714	0.0844224	1.0689	1.38872	1.0259	1.06501
-35.5	1.14922	0.0932442	1.09617	1.42527	1.02262	1.05284
-35	1.14492	0.0973923	1.1398	1.42142	0.993023	1.02546
-34.5	1.18331	0.0772498	1.18888	1.39834	1.05057	1.09544
-34	1.22155	0.0633691	1.17252	1.36372	1.07194	1.27802
-33.5	1.16885	0.0721833	1.1398	1.37141	1.02919	1.135
-33	1.14262	0.0996019	1.12889	1.42527	1.04563	0.970684
-32.5	1.18396	0.0872695	1.14525	1.43873	1.04728	1.10457
-32	1.14514	0.09457	1.14525	1.40988	1.04563	0.979813
-31.5	1.12929	0.0723066	1.11253	1.33871	1.03741	1.0285
-31	1.1505	0.0515056	1.09617	1.28678	1.05057	1.16847
-30.5	1.14296	0.0495174	1.0689	1.25793	1.05221	1.19282
-30	1.15578	0.0717172	1.04163	1.26562	1.02262	1.29323
-29.5	1.1896	0.0682868	1.09072	1.31755	1.05385	1.29627
-29	1.23565	0.0738256	1.10162	1.37526	1.11468	1.35105
-28.5	1.24447	0.0722226	1.08526	1.40026	1.16565	1.3267
-28	1.18188	0.0552537	1.11798	1.34448	1.15743	1.10761
-27.5	1.18714	0.0289227	1.16161	1.27139	1.14099	1.17456
-27	1.17737	0.0248201	1.1398	1.24639	1.14263	1.18064
-26.5	1.12927	0.0503898	1.06345	1.26562	1.14428	1.04371
-26	1.15306	0.0551837	1.07435	1.30986	1.15085	1.07719
-25.5	1.1703	0.0610519	1.07981	1.35025	1.13441	1.11674
-25	1.18545	0.0643383	1.05799	1.35987	1.13113	1.19282
-24.5	1.19721	0.064475	1.05254	1.35218	1.14263	1.2415
-24	1.17836	0.0492676	1.10708	1.32333	1.15414	1.12891
-23.5	1.12355	0.0765967	1.10708	1.29832	1.16072	0.928084
-23	1.0988	0.074666	1.04709	1.27716	1.14592	0.925041
-22.5	1.09191	0.0626511	1.10708	1.22908	1.10646	0.925041
-22	1.09269	0.0692538	1.14525	1.22138	1.10646	0.897655
-21.5	1.12423	0.0477221	1.11798	1.24062	1.13113	1.0072
-21	1.10953	0.05077	1.09072	1.24639	1.09989	1.00111
-20.5	1.09255	0.0567134	1.10162	1.23485	1.07523	0.958513
-20	1.10869	0.0346138	1.10162	1.206	1.08345	1.04371
-19.5	1.12346	0.0338646	1.05799	1.21561	1.12784	1.0924
-19	1.12361	0.0460618	1.00346	1.22715	1.14099	1.12283
-18.5	1.10542	0.0402701	1.01437	1.20984	1.10811	1.08936
-18	1.0978	0.026773	1.04163	1.16945	1.09989	1.08023
-17.5	1.09023	0.0364204	1.00346	1.16368	1.05879	1.135
-17	1.09178	0.0459997	1.01982	1.20984	1.01768	1.11979
-16.5	1.05442	0.0479344	1.02527	1.19253	1.02919	0.970684
-16	1.06385	0.0480327	1.00891	1.19638	1.07029	0.979813
-15.5	1.09665	0.0459366	1.01982	1.22908	1.0818	1.05589
-15	1.05363	0.055933	1.01437	1.20792	1.04892	0.943298
-14.5	1.05554	0.0604915	1.01437	1.22331	1.04728	0.937212
-14	1.02848	0.0942853	1.02527	1.24831	1.05221	0.78811
-13.5	1.01784	0.0966731	1.07981	1.18676	1.06536	0.739424
-13	1.03446	0.0731844	1.0689	1.15406	1.09331	0.821582
-12.5	0.973585	0.100311	0.965283	1.13868	1.0966	0.693781
-12	0.960274	0.0857588	0.921655	1.09444	1.09167	0.733338
-11.5	0.994309	0.0558102	0.970737	1.07713	1.08345	0.845925
-11	1.01427	0.038491	0.987098	1.09059	1.06043	0.918955
-10.5	1.03711	0.0252975	0.987098	1.10598	1.03906	1.01633
-10	1.04178	0.031355	0.97619	1.12713	1.02919	1.03459
-9.5	1.04404	0.0401627	0.95983	1.1329	1.08838	0.995027
-9	1.04773	0.0412401	0.95983	1.12136	1.11468	0.995027
-8.5	1.07434	0.0419919	0.954376	1.14445	1.0818	1.11674
-8	1.0862	0.0398834	0.97619	1.15791	1.0818	1.12891
-7.5	1.05346	0.0295326	0.97619	1.11944	1.06536	1.05284
-7	1.06321	0.0251479	0.992551	1.08097	1.06865	1.11066
-6.5	1.08433	0.0271787	1.00346	1.11559	1.10153	1.11674
-6	1.09666	0.0267963	1.03073	1.15983	1.10975	1.08631
-5.5	1.08076	0.0245971	1.01982	1.12329	1.11797	1.06197
-5	1.03459	0.0387023	0.998005	1.09059	1.10646	0.943298
-4.5	1.02402	0.0486237	1.01982	1.0829	1.10482	0.888526
-4	1.04307	0.0368851	0.998005	1.0502	1.14428	0.979813
-3.5	1.05709	0.0350922	0.97619	1.06558	1.14592	1.04067
-3	1.04581	0.0324782	0.95983	1.10021	1.09167	1.03154
-2.5	1.05463	0.0259796	0.981644	1.06366	1.06865	1.10457
-2	1.05997	0.0230294	1.03073	1.01365	1.0818	1.1137
-1.5	1.05173	0.023443	1.05799	0.986724	1.06372	1.09849
-1	1.06203	0.0487855	1.04163	0.961719	1.04892	1.19586
-0.5	1.04804	0.0304835	1.04709	0.963642	1.07687	1.10457
0	1.00728	0.0341721	1.03618	0.944408	1.09002	0.958513
0.5	0.99917	0.0223126	0.992551	0.963642	1.06372	0.97677
1	1.0408	0.0137649	1.01982	1.01558	1.07194	1.05589
1.5	1.04302	0.00883582	1.02527	1.03096	1.05385	1.06197
2	1.02135	0.0100598	0.998005	1.03866	1.01111	1.03763
2.5	1.02119	0.00915836	1.04163	1.0175	1.02755	0.99807
3	1.05301	0.0181846	1.05254	1.02904	1.0259	1.10457
3.5	1.05737	0.0410658	0.998005	1.05404	1.00289	1.17456
4	1.02072	0.00831229	0.998005	1.02135	1.0259	1.03763
4.5	1.02443	0.0230986	0.992551	0.980953	1.04399	1.08023
5	1.02382	0.0347344	0.954376	0.975183	1.07029	1.09544
5.5	1.01203	0.0369946	0.910748	1.01365	1.03741	1.08631
6	1.04155	0.0504059	0.938015	1.04443	1.00618	1.1776
6.5	1.0425	0.0341115	0.970737	1.03673	1.02755	1.135
7	0.998731	0.00585546	0.981644	1.00788	1.00124	1.00416
7.5	1.01315	0.0225805	0.987098	1.01173	0.976582	1.07719
8	1.07403	0.0714077	0.970737	1.06751	0.97987	1.27802
8.5	1.08762	0.0451208	1.05799	1.06751	1.00782	1.21716
9	1.01789	0.0164646	1.06345	1.0175	0.986446	1.00416
9.5	1.01697	0.0195906	1.02527	0.996341	0.978226	1.06806
10	1.04402	0.0340298	1.02527	1.01365	0.993023	1.14413
10.5	1.00482	0.00983251	0.987098	1.03289	1.00124	0.99807
11	1.00396	0.0319638	0.965283	1.05597	1.06043	0.93417
11.5	0.983187	0.0513305	0.970737	1.05212	1.06701	0.842883
12	0.961289	0.0686045	0.97619	1.06943	1.03577	0.763767
12.5	1.01205	0.0163669	1.01982	1.04635	1.0144	0.967641
13	1.02539	0.0312468	1.00346	0.975183	1.00618	1.11674
13.5	1.00986	0.0204141	0.981644	0.971336	1.02755	1.05893
14	1.01686	0.0142642	1.00891	0.980953	1.03084	1.04676
14.5	1.00377	0.0224032	0.95983	0.971336	1.03412	1.0498
15	0.987493	0.0183861	0.943469	0.971336	1.01275	1.02241
15.5	0.962653	0.0190447	0.987098	0.986724	0.970006	0.906783
16	0.933757	0.0443591	1.01982	0.97903	0.920683	0.815497
16.5	0.954699	0.0275471	1.01982	0.977106	0.92726	0.894612
17	0.956187	0.0246637	1.00891	0.986724	0.922327	0.906783
17.5	0.91646	0.0561571	1.01982	0.986724	0.889446	0.769853
18	0.899878	0.0591638	0.992551	0.967489	0.909175	0.730295
18.5	0.930878	0.0270089	0.97619	0.961719	0.930548	0.855054
19	0.962616	0.0364578	1.05799	0.980953	0.910819	0.900698
19.5	0.890816	0.0501305	1.03618	0.85593	0.864785	0.806368
20	0.804383	0.0526507	0.916201	0.727059	0.871361	0.702909
20.5	0.77742	0.0762648	0.89984	0.705902	0.907531	0.596408
21	0.767494	0.107844	0.938015	0.657816	0.956853	0.517293
21.5	0.744909	0.105785	0.927108	0.642428	0.914107	0.495992
22	0.722317	0.0712207	0.818037	0.648199	0.863141	0.559893
22.5	0.703943	0.0745977	0.714419	0.630888	0.907531	0.562936
23	0.695112	0.0855527	0.665337	0.588572	0.945344	0.581193
23.5	0.710712	0.0734445	0.725326	0.569338	0.909175	0.639008
24	0.734063	0.0684483	0.818037	0.590495	0.879581	0.648137
24.5	0.740006	0.0591535	0.763501	0.611653	0.89109	0.693781
25	0.723031	0.0597635	0.719872	0.605883	0.887802	0.678566
25.5	0.748039	0.0659799	0.725326	0.602036	0.922327	0.742467
26	0.755038	0.0749528	0.703512	0.596266	0.953565	0.76681
26.5	0.722532	0.0677859	0.659883	0.592419	0.907531	0.730295
27	0.722768	0.0647339	0.659883	0.594342	0.894378	0.742467
27.5	0.728992	0.0629318	0.665337	0.596266	0.884514	0.769853
28	0.729523	0.0573033	0.681697	0.600113	0.866429	0.769853
28.5	0.725858	0.0544757	0.687151	0.642428	0.886158	0.687695
29	0.732851	0.0591697	0.703512	0.653969	0.907531	0.666395
29.5	0.76679	0.0641704	0.763501	0.646275	0.945344	0.712038
30	0.790008	0.080179	0.758047	0.646275	1.01933	0.736381
30.5	0.79529	0.0860242	0.763501	0.60973	1.0259	0.782025
31	0.809603	0.075901	0.752594	0.627041	0.973294	0.885483
31.5	0.810466	0.0772709	0.692604	0.663586	0.966717	0.918955
32	0.793679	0.076362	0.665337	0.657816	0.917395	0.93417
32.5	0.803215	0.0782947	0.698058	0.642428	0.910819	0.961556
33	0.816679	0.0756089	0.719872	0.655892	0.93548	0.95547
33.5	0.794025	0.0754238	0.708965	0.625117	0.932192	0.909826
34	0.795932	0.0755074	0.708965	0.628964	0.942056	0.903741
34.5	0.828415	0.0680151	0.768955	0.665509	0.920683	0.958513
35	0.787843	0.0503824	0.763501	0.659739	0.894378	0.833754
35.5	0.789475	0.0564194	0.703512	0.68282	0.864785	0.906783
36	0.808971	0.0729402	0.714419	0.694361	0.813818	1.01328
36.5	0.790609	0.0652952	0.703512	0.696284	0.785869	0.97677
37	0.795501	0.0867194	0.676244	0.669356	0.795733	1.04067
37.5	0.793151	0.0797288	0.67079	0.665509	0.835191	1.00111
38	0.767096	0.0626476	0.665337	0.652045	0.874649	0.876354
38.5	0.751432	0.0559613	0.708965	0.630888	0.896022	0.769853
39	0.771854	0.0518701	0.80713	0.653969	0.896022	0.730295
39.5	0.76882	0.0465306	0.801676	0.652045	0.873005	0.748553
40	0.751075	0.0365965	0.741687	0.673203	0.849988	0.739424
40.5	0.757335	0.0276561	0.736233	0.696284	0.826971	0.769853
41	0.761515	0.0382074	0.74714	0.665509	0.848344	0.785068
41.5	0.74578	0.0447192	0.725326	0.640505	0.856564	0.760724
42	0.782111	0.0637272	0.714419	0.648199	0.828615	0.937212
42.5	0.800683	0.0584068	0.708965	0.705902	0.838479	0.949384
43	0.762104	0.0296751	0.692604	0.73283	0.81053	0.812454
43.5	0.780517	0.0416179	0.719872	0.707825	0.808886	0.885483
44	0.826096	0.0889003	0.741687	0.690514	0.785869	1.08631
44.5	0.83149	0.0900648	0.812583	0.680897	0.743123	1.08936
45	0.805599	0.0686294	0.80713	0.690514	0.726682	0.99807
45.5	0.784786	0.0525711	0.752594	0.709749	0.736547	0.940255
46	0.810379	0.0648048	0.768955	0.700131	0.77436	0.99807
46.5	0.839463	0.0959223	0.774408	0.667433	0.80231	1.1137
47	0.825918	0.0597584	0.774408	0.713595	0.823683	0.991985
47.5	0.829934	0.0498598	0.812583	0.728983	0.81053	0.967641
48	0.833939	0.0813872	0.818037	0.67128	0.787513	1.05893
48.5	0.810979	0.0643068	0.801676	0.67705	0.779293	0.985899
49	0.777005	0.0380823	0.82349	0.68282	0.749699	0.852011
49.5	0.777676	0.032949	0.839851	0.696284	0.752987	0.821582
50	0.783192	0.024686	0.850758	0.759758	0.785869	0.736381
50.5	0.766649	0.0248228	0.834397	0.755911	0.761208	0.715081
51	0.745322	0.0152531	0.774408	0.727059	0.767784	0.712038
51.5	0.733851	0.0363737	0.763501	0.755911	0.789157	0.626837
52	0.752603	0.0389253	0.80713	0.753988	0.807242	0.642051
52.5	0.788374	0.0367164	0.828944	0.728983	0.871361	0.72421
53	0.8018	0.0423224	0.812583	0.734753	0.917395	0.742467
53.5	0.778272	0.0462826	0.790769	0.728983	0.902598	0.690738
54	0.789597	0.0355821	0.839851	0.73283	0.861497	0.72421
54.5	0.798217	0.0229469	0.839851	0.73283	0.813818	0.806368
55	0.778332	0.0300961	0.790769	0.717442	0.856564	0.748553
55.5	0.768586	0.0405678	0.758047	0.752064	0.879581	0.684652
56	0.814303	0.0180294	0.785315	0.780916	0.845056	0.845925
56.5	0.806004	0.0125904	0.790769	0.780916	0.836835	0.815497
57	0.765865	0.0232782	0.752594	0.775145	0.823683	0.712038
57.5	0.778844	0.0126069	0.796222	0.763605	0.803954	0.751596
58	0.771711	0.0337546	0.845305	0.778992	0.780937	0.681609
58.5	0.781781	0.042829	0.878026	0.769375	0.807242	0.67248
59	0.792853	0.0332428	0.867119	0.765528	0.823683	0.715081
59.5	0.789152	0.0404123	0.872572	0.798227	0.807242	0.678566
60	0.794156	0.0561082	0.932562	0.773222	0.81053	0.660309
60.5	0.801757	0.0437689	0.916201	0.761681	0.817106	0.712038
61	0.798746	0.0366775	0.878026	0.746294	0.843412	0.727252
61.5	0.822809	0.0398822	0.894387	0.734753	0.886158	0.775939
62	0.811195	0.0506011	0.910748	0.740524	0.884514	0.708995
62.5	0.812691	0.0526119	0.905294	0.746294	0.89931	0.699866
63	0.835991	0.0448449	0.927108	0.746294	0.897666	0.772896
63.5	0.817383	0.0551888	0.932562	0.753988	0.886158	0.696824
64	0.813063	0.0609262	0.932562	0.773222	0.886158	0.660309
64.5	0.794389	0.0535976	0.894387	0.777069	0.85492	0.65118
65	0.78857	0.046063	0.856212	0.782839	0.85492	0.660309
65.5	0.766099	0.0665193	0.861665	0.742447	0.873005	0.587279
66	0.75147	0.0861883	0.856212	0.771299	0.876293	0.502078
66.5	0.789102	0.0652108	0.878026	0.786686	0.886158	0.605537
67	0.778744	0.0679603	0.867119	0.727059	0.909175	0.611622
67.5	0.791962	0.0765812	0.828944	0.74437	0.97987	0.614665
68	0.822687	0.0670333	0.850758	0.740524	0.999599	0.699866
68.5	0.80477	0.0705345	0.856212	0.721289	0.978226	0.663352
69	0.812649	0.0745994	0.850758	0.74437	1.00124	0.654223
69.5	0.871385	0.0662404	0.89984	0.765528	1.04728	0.772896
70	0.873224	0.0663837	0.888933	0.755911	1.05385	0.794196
70.5	0.854343	0.0662791	0.834397	0.759758	1.04728	0.775939
71	0.882849	0.0488852	0.88348	0.777069	1.01275	0.858097
71.5	0.872429	0.0525366	0.932562	0.717442	0.942056	0.897655
72	0.886152	0.0600151	0.981644	0.721289	0.968362	0.873312
72.5	0.909859	0.0582712	0.965283	0.736677	0.98809	0.949384
73	0.88387	0.0655457	0.916201	0.690514	0.973294	0.95547
73.5	0.853607	0.0595366	0.970737	0.728983	0.938768	0.775939
74	0.816376	0.0761233	0.948923	0.765528	0.92726	0.623794
74.5	0.789756	0.0868906	0.89984	0.780916	0.930548	0.547722
75	0.856237	0.0823813	1.03618	0.803997	0.930548	0.654223
75.5	0.880048	0.114879	1.17252	0.790533	0.92726	0.62988
76	0.84865	0.139946	1.17252	0.765528	0.945344	0.511207
76.5	0.884684	0.118422	1.17252	0.778992	0.963429	0.623794
77	0.887468	0.072435	1.06345	0.777069	0.948633	0.760724
77.5	0.884854	0.056611	0.998005	0.765528	0.963429	0.812454
78	0.898489	0.0515575	0.97619	0.798227	0.997955	0.821582
78.5	0.895469	0.0492962	0.938015	0.775145	1.00453	0.864183
79	0.865378	0.0645542	0.965283	0.74437	0.98809	0.763767
79.5	0.967688	0.0396776	1.01982	0.954025	1.03577	0.86114
80	1.10578	0.0327723	1.07435	1.20407	1.07358	1.0711
80.5	1.07249	0.0673318	1.00346	1.27332	1.02426	0.988942
81	1.06644	0.0844032	0.987098	1.31948	0.973294	0.985899
81.5	1.09894	0.0852291	1.09072	1.34256	0.976582	0.985899
82	1.08769	0.0961166	1.11798	1.34448	0.981514	0.906783
82.5	1.09421	0.107438	1.16707	1.35987	0.976582	0.873312
83	1.1015	0.112631	1.19433	1.37141	0.970006	0.870269
83.5	1.09273	0.0974776	1.09072	1.36756	0.981514	0.931127
84	1.13714	0.0844224	1.0689	1.38872	1.0259	1.06501
84.5	1.14922	0.0932442	1.09617	1.42527	1.02262	1.05284
85	1.14492	0.0973923	1.1398	1.42142	0.993023	1.02546
85.5	1.18331	0.0772498	1.18888	1.39834	1.05057	1.09544
86	1.22155	0.0633691	1.17252	1.36372	1.07194	1.27802
86.5	1.16885	0.0721833	1.1398	1.37141	1.02919	1.135
87	1.14262	0.0996019	1.12889	1.42527	1.04563	0.970684
87.5	1.18396	0.0872695	1.14525	1.43873	1.04728	1.10457
88	1.14514	0.09457	1.14525	1.40988	1.04563	0.979813
88.5	1.12929	0.0723066	1.11253	1.33871	1.03741	1.0285
89	1.1505	0.0515056	1.09617	1.28678	1.05057	1.16847
89.5	1.14296	0.0495174	1.0689	1.25793	1.05221	1.19282
90	1.15578	0.0717172	1.04163	1.26562	1.02262	1.29323
90.5	1.1896	0.0682868	1.09072	1.31755	1.05385	1.29627
91	1.23565	0.0738256	1.10162	1.37526	1.11468	1.35105
91.5	1.24447	0.0722226	1.08526	1.40026	1.16565	1.3267
92	1.18188	0.0552537	1.11798	1.34448	1.15743	1.10761
92.5	1.18714	0.0289227	1.16161	1.27139	1.14099	1.17456
93	1.17737	0.0248201	1.1398	1.24639	1.14263	1.18064
93.5	1.12927	0.0503898	1.06345	1.26562	1.14428	1.04371
94	1.15306	0.0551837	1.07435	1.30986	1.15085	1.07719
94.5	1.1703	0.0610519	1.07981	1.35025	1.13441	1.11674
95	1.18545	0.0643383	1.05799	1.35987	1.13113	1.19282
95.5	1.19721	0.064475	1.05254	1.35218	1.14263	1.2415
96	1.17836	0.0492676	1.10708	1.32333	1.15414	1.12891
96.5	1.12355	0.0765967	1.10708	1.29832	1.16072	0.928084
97	1.0988	0.074666	1.04709	1.27716	1.14592	0.925041
97.5	1.09191	0.0626511	1.10708	1.22908	1.10646	0.925041
98	1.09269	0.0692538	1.14525	1.22138	1.10646	0.897655
98.5	1.12423	0.0477221	1.11798	1.24062	1.13113	1.0072
99	1.10953	0.05077	1.09072	1.24639	1.09989	1.00111
99.5	1.09255	0.0567134	1.10162	1.23485	1.07523	0.958513
100	1.10869	0.0346138	1.10162	1.206	1.08345	1.04371
100.5	1.12346	0.0338646	1.05799	1.21561	1.12784	1.0924
101	1.12361	0.0460618	1.00346	1.22715	1.14099	1.12283
101.5	1.10542	0.0402701	1.01437	1.20984	1.10811	1.08936
102	1.0978	0.026773	1.04163	1.16945	1.09989	1.08023
102.5	1.09023	0.0364204	1.00346	1.16368	1.05879	1.135
103	1.09178	0.0459997	1.01982	1.20984	1.01768	1.11979
103.5	1.05442	0.0479344	1.02527	1.19253	1.02919	0.970684
104	1.06385	0.0480327	1.00891	1.19638	1.07029	0.979813
104.5	1.09665	0.0459366	1.01982	1.22908	1.0818	1.05589
105	1.05363	0.055933	1.01437	1.20792	1.04892	0.943298
105.5	1.05554	0.0604915	1.01437	1.22331	1.04728	0.937212
106	1.02848	0.0942853	1.02527	1.24831	1.05221	0.78811
106.5	1.01784	0.0966731	1.07981	1.18676	1.06536	0.739424
107	1.03446	0.0731844	1.0689	1.15406	1.09331	0.821582
107.5	0.973585	0.100311	0.965283	1.13868	1.0966	0.693781
108	0.960274	0.0857588	0.921655	1.09444	1.09167	0.733338
108.5	0.994309	0.0558102	0.970737	1.07713	1.08345	0.845925
109	1.01427	0.038491	0.987098	1.09059	1.06043	0.918955
109.5	1.03711	0.0252975	0.987098	1.10598	1.03906	1.01633
110	1.04178	0.031355	0.97619	1.12713	1.02919	1.03459
110.5	1.04404	0.0401627	0.95983	1.1329	1.08838	0.995027
111	1.04773	0.0412401	0.95983	1.12136	1.11468	0.995027
111.5	1.07434	0.0419919	0.954376	1.14445	1.0818	1.11674
112	1.0862	0.0398834	0.97619	1.15791	1.0818	1.12891
112.5	1.05346	0.0295326	0.97619	1.11944	1.06536	1.05284
113	1.06321	0.0251479	0.992551	1.08097	1.06865	1.11066
113.5	1.08433	0.0271787	1.00346	1.11559	1.10153	1.11674
114	1.09666	0.0267963	1.03073	1.15983	1.10975	1.08631
114.5	1.08076	0.0245971	1.01982	1.12329	1.11797	1.06197
115	1.03459	0.0387023	0.998005	1.09059	1.10646	0.943298
115.5	1.02402	0.0486237	1.01982	1.0829	1.10482	0.888526
116	1.04307	0.0368851	0.998005	1.0502	1.14428	0.979813
116.5	1.05709	0.0350922	0.97619	1.06558	1.14592	1.04067
117	1.04581	0.0324782	0.95983	1.10021	1.09167	1.03154
117.5	1.05463	0.0259796	0.981644	1.06366	1.06865	1.10457
118	1.05997	0.0230294	1.03073	1.01365	1.0818	1.1137
118.5	1.05173	0.023443	1.05799	0.986724	1.06372	1.09849
119	1.06203	0.0487855	1.04163	0.961719	1.04892	1.19586
119.5	1.04804	0.0304835	1.04709	0.963642	1.07687	1.10457
120	1.02668	0.0394835	1.07981	0.969413	1.10811	0.949384

## Sheet: Fig1I DCN Halo
	Normalized
Time (s)	Halo Avg	Halo SEM	DCNHaloCell1	DCNHaloCell2	DCNHaloCell3	DCNHaloCell4	DCNHaloCell5	DCNHaloCell6	DCNHaloCell7	DCNHaloCell8	DCNHaloCell9	DCNHaloCell10	DCNHaloCell11
-60	0.989658	0.0739209	0.838957	0.624173	0.728037	1.13899	1.2303	1.07216	1.00847	0.645974	1.13638	1.35877	1.10404
-59.5	1.01193	0.0715786	0.875258	0.61766	0.770613	1.12158	1.22552	1.10851	1.1011	0.702013	1.05368	1.37062	1.1847
-59	1.03085	0.0712461	0.879292	0.652396	0.796158	1.09374	1.20641	1.12446	1.20072	0.731561	1.01918	1.38975	1.24571
-58.5	1.04202	0.0759887	0.810723	0.588351	0.834476	1.16857	1.20641	1.16623	1.26598	0.817147	0.952915	1.37426	1.27711
-58	1.04108	0.08036	0.762322	0.54493	0.819574	1.16683	1.17655	1.17261	1.33123	0.860959	0.964964	1.35057	1.30136
-57.5	1.04417	0.080184	0.721987	0.550357	0.87918	1.27211	1.05949	1.18569	1.34463	0.901715	0.95182	1.3214	1.29753
-57	1.03836	0.0752642	0.709887	0.585094	0.932399	1.28256	0.950794	1.18154	1.3219	0.954697	0.946891	1.28313	1.27303
-56.5	1.04944	0.0705217	0.754255	0.674106	0.968588	1.31823	0.828958	1.19047	1.32423	1.03111	0.943605	1.2485	1.26179
-56	1.04911	0.0675042	0.822823	0.766375	1.00052	1.30344	0.69279	1.17198	1.31433	1.05659	0.925533	1.23301	1.25286
-55.5	1.05405	0.0652797	0.915593	0.832592	1.09206	1.30692	0.609177	1.14678	1.26656	1.09734	0.890483	1.19929	1.2378
-55	1.05723	0.0569502	0.976094	0.884697	1.12825	1.24949	0.645011	1.11043	1.23277	1.12689	0.883363	1.17286	1.21967
-54.5	1.04659	0.0485927	1.00433	0.948742	1.08993	1.20772	0.662928	1.09065	1.18674	1.05353	0.915127	1.15737	1.19542
-54	1.01987	0.0431921	0.996262	0.931374	1.04522	1.19902	0.695178	1.06227	1.11508	0.940432	0.934295	1.13459	1.16479
-53.5	1.01331	0.0366404	0.984161	0.958512	1.04309	1.15813	0.75968	1.04314	1.08188	0.877261	0.967702	1.11271	1.1602
-53	1.00064	0.0312518	0.963994	0.938973	0.987747	1.09896	0.808653	1.03006	1.06789	0.867073	0.990703	1.10907	1.14386
-52.5	1.00131	0.0296704	0.988195	0.876013	0.949429	1.05632	0.861209	1.02273	1.06265	0.875224	1.07997	1.10542	1.13722
-52	1.00838	0.0252474	0.988195	0.82825	0.98136	1.01021	0.950794	1.00455	1.07488	0.955716	1.07614	1.09813	1.12395
-51.5	1.01712	0.0306294	1.03256	0.792428	1.03671	0.922326	0.93646	0.989881	1.10285	1.03417	1.10845	1.10542	1.12701
-51	1.00904	0.0353477	1.0366	0.771803	1.04097	0.891002	0.864792	0.981908	1.09761	1.11466	1.10352	1.09358	1.10302
-50.5	1.00086	0.0328067	1.00433	0.829335	1.058	0.866638	0.839709	0.965644	1.07721	1.12281	1.07833	1.0872	1.0803
-50	0.985269	0.0363005	0.931727	0.921604	1.10483	0.799639	0.771624	0.965963	1.07255	1.11161	0.989608	1.08264	1.08617
-49.5	0.988551	0.0363227	0.93576	1.00736	1.11334	0.777886	0.756096	0.980632	1.05974	1.06677	1.02301	1.07444	1.07902
-49	0.995194	0.0367817	0.963994	1.11048	1.09206	0.764834	0.760874	1.00009	1.05391	1.05964	1.01973	1.0471	1.07443
-48.5	0.998341	0.0355791	0.976094	1.1767	1.06225	0.770055	0.799097	0.997853	1.05449	1.04028	1.00385	1.03252	1.06856
-48	1.00389	0.0392497	1.04063	1.21795	1.02394	0.760484	0.774013	1.00646	1.06848	1.04742	1.02575	1.01885	1.05886
-47.5	0.998456	0.0380141	1.0608	1.22446	0.970717	0.790938	0.768041	1.00614	1.05566	1.03926	1.02794	1.007	1.03205
-47	0.979268	0.0410418	1.085	1.18539	0.951558	0.788328	0.688012	0.993707	1.04401	1.03417	0.984679	0.994243	1.02286
-46.5	0.962784	0.0375619	1.03256	1.15825	0.928141	0.809211	0.685623	0.978719	1.0341	0.998509	0.957844	0.987864	1.0198
-46	0.961632	0.0417491	1.04466	1.17453	0.932399	0.770925	0.665317	0.997534	1.04459	0.949602	0.978655	0.98513	1.0346
-45.5	0.957663	0.0432455	0.996262	1.1767	0.949429	0.763094	0.648594	1.00072	1.04459	0.939414	0.967154	0.978751	1.06958
-45	0.969762	0.0427449	0.988195	1.20384	0.934528	0.797029	0.6689	1.01189	1.04168	0.941451	1.02575	0.968726	1.0854
-44.5	0.976962	0.0460195	1.00433	1.24509	0.919626	0.795289	0.666511	1.03421	1.0475	0.929225	1.03999	0.973283	1.09153
-44	0.984604	0.0459934	1.04466	1.24292	0.906854	0.809211	0.671289	1.0527	1.04692	0.935338	1.04383	0.978751	1.09817
-43.5	0.987063	0.0419311	1.04466	1.23423	0.883437	0.842275	0.708318	1.04537	1.0376	0.957753	1.0493	0.974194	1.08055
-43	0.990334	0.0396025	1.0729	1.23206	0.838733	0.867508	0.765652	1.05813	1.02187	0.95164	1.06354	0.958702	1.06294
-42.5	0.980349	0.0416416	1.1334	1.21578	0.813188	0.832704	0.764457	1.05621	0.998565	0.938395	1.03232	0.953234	1.04558
-42	0.970449	0.0398204	1.07693	1.21361	0.811059	0.830963	0.765652	1.05876	0.971183	0.949602	1.01863	0.935008	1.04354
-41.5	0.962883	0.0396798	1.07693	1.19733	0.823832	0.792678	0.78118	1.05845	0.951375	0.943489	1.02192	0.899467	1.04507
-41	0.946385	0.0356004	1.01643	1.15391	0.872793	0.762224	0.783569	1.05717	0.917002	0.943489	0.984131	0.886708	1.03282
-40.5	0.936153	0.0338206	0.976094	1.12785	0.917497	0.725679	0.797902	1.04792	0.909428	0.958772	0.932652	0.883063	1.02082
-40	0.93917	0.0313613	0.93576	1.11591	0.943043	0.747432	0.812236	1.04505	0.911758	0.97915	0.949082	0.87395	1.0175
-39.5	0.960822	0.0284049	1.03256	1.09854	0.962201	0.799639	0.842098	1.02911	0.910011	1.04538	0.977012	0.870305	1.00219
-39	0.979702	0.0319107	1.0245	1.14522	0.979232	0.822262	0.881515	1.01348	0.911758	1.16153	0.967154	0.883974	0.986103
-38.5	0.998129	0.0424941	1.0729	1.20384	0.962201	0.841405	0.852848	1.00359	0.917002	1.28583	0.97756	0.88124	0.980998
-38	1.0154	0.053364	1.0971	1.2364	0.949429	0.871859	0.819403	0.996578	0.917584	1.41931	1.01973	0.879418	0.962619
-37.5	1.03048	0.0633073	1.13743	1.25269	0.966459	0.852716	0.812236	0.994345	0.922828	1.5375	1.01809	0.885797	0.955216
-37	1.03486	0.0689808	1.1213	1.26354	0.977103	0.840535	0.801486	0.996578	0.917002	1.60475	1.02082	0.893087	0.947303
-36.5	1.03148	0.0686559	1.0729	1.25703	0.974974	0.894482	0.750124	0.99881	0.910593	1.59761	1.06026	0.898555	0.930965
-36	1.03834	0.066453	1.05273	1.26897	0.992004	0.932767	0.768041	1.002	0.912341	1.58131	1.08435	0.893999	0.933263
-35.5	1.04031	0.0620976	1.0487	1.26463	1.02181	0.959741	0.765652	1.00901	0.919332	1.53546	1.07723	0.900378	0.941431
-35	1.03707	0.0570994	1.03256	1.2668	1.03671	0.980624	0.750124	1.0138	0.950792	1.46516	1.06464	0.888531	0.958024
-34.5	1.02092	0.0512338	1.0003	1.24509	1.01755	0.982364	0.731012	1.02081	0.983417	1.38161	1.01316	0.885797	0.969
-34	1.01095	0.046789	1.05273	1.21687	0.985618	0.946689	0.721457	1.02081	1.02245	1.30825	0.973178	0.877595	0.994783
-33.5	0.99324	0.038618	1.01643	1.16476	0.940914	0.95278	0.72504	1.02432	1.05449	1.19108	0.961678	0.88124	1.01291
-33	0.982761	0.0363557	0.980128	1.15825	0.900467	0.994546	0.716679	1.01603	1.06906	1.10447	0.964416	0.877595	1.02873
-32.5	0.975762	0.0337826	0.931727	1.18973	0.881308	0.978014	0.75968	1.00423	1.04575	1.06677	0.961678	0.896733	1.01776
-32	0.981998	0.0349689	0.895425	1.22338	0.889823	0.995416	0.783569	0.992113	1.02245	1.079	1.01809	0.89491	1.0078
-31.5	0.973086	0.0343784	0.855091	1.22121	0.911111	1.0163	0.797902	0.988605	0.985748	1.08002	0.97756	0.893999	0.976403
-31	0.975127	0.0335613	0.895425	1.20058	0.917497	1.04849	0.794319	0.985097	0.963027	1.10447	0.984679	0.890353	0.942452
-30.5	0.972566	0.031226	0.951894	1.17019	0.928141	1.05893	0.801486	0.987967	0.932149	1.1004	0.965511	0.884886	0.91667
-30	0.970175	0.0379117	1.0729	1.13328	0.883437	1.09983	0.742957	0.991475	0.912924	1.12995	0.929914	0.872127	0.903141
-29.5	0.969998	0.0427707	1.1334	1.13979	0.877051	1.09287	0.72504	0.990518	0.914089	1.1544	0.868029	0.87395	0.900844
-29	0.980921	0.044717	1.14147	1.18864	0.874922	1.06416	0.736985	0.996578	0.919915	1.1921	0.885006	0.87395	0.916415
-28.5	0.988073	0.0490227	1.12937	1.26897	0.932399	1.00064	0.727429	0.994664	0.909428	1.22878	0.864196	0.879418	0.933518
-28	0.999173	0.0528883	1.09306	1.33302	0.985618	0.945819	0.726235	0.992432	0.937975	1.27259	0.868577	0.89491	0.940666
-27.5	1.00927	0.0535617	1.02853	1.38078	1.0878	0.910144	0.766846	0.993707	0.969435	1.25323	0.84448	0.898555	0.96849
-27	1.0109	0.0496129	0.992228	1.38512	1.08354	0.908404	0.81343	0.994983	0.976426	1.21349	0.869124	0.900378	0.982785
-26.5	0.998852	0.0471266	0.992228	1.34387	1.08567	0.895352	0.782374	0.995302	0.977591	1.16968	0.850504	0.907668	0.987124
-26	0.980126	0.041474	1.04063	1.2668	1.03032	0.874469	0.771624	1.00774	0.992739	1.09123	0.815454	0.904023	0.986359
-25.5	0.968655	0.0375066	1.04466	1.22121	0.996262	0.87621	0.779985	1.01539	1.00206	1.01481	0.79793	0.9022	1.00448
-25	0.95716	0.0344366	1.0245	1.20058	0.934528	0.866638	0.812236	1.02018	1.02303	0.948583	0.801763	0.9022	0.994527
-24.5	0.94909	0.0378143	0.992228	1.22446	0.936656	0.840535	0.818208	1.02209	1.04459	0.888469	0.778762	0.905846	0.988146
-24	0.954515	0.0379257	0.939793	1.25594	0.934528	0.870989	0.886293	1.01476	1.06382	0.833449	0.806692	0.90858	0.984827
-23.5	0.960023	0.0388176	0.911559	1.28634	0.943043	0.882301	0.912571	0.997215	1.06032	0.843638	0.81655	0.916782	0.989932
-23	0.971867	0.0369086	0.980128	1.29936	0.934528	0.887521	0.932877	0.991475	1.0341	0.883375	0.836813	0.926806	0.983551
-22.5	0.979987	0.0305771	0.955927	1.26354	0.9473	0.914495	0.941238	0.988924	1.01721	0.923111	0.891031	0.935919	1.00116
-22	0.987125	0.0249478	0.992228	1.21252	0.945171	0.937988	0.911377	0.9902	1.00847	0.98832	0.927176	0.932274	1.01265
-21.5	0.996065	0.0244023	1.01643	1.17453	0.934528	0.966702	0.897043	0.994664	1.01721	1.07594	0.911294	0.93683	1.03154
-21	1.01159	0.0260303	0.984161	1.1767	0.936656	1.02152	0.913765	1.00646	1.0207	1.15542	0.938129	0.94321	1.03078
-20.5	1.01344	0.0313839	0.871225	1.15391	0.945171	1.03631	0.931682	1.01603	1.051	1.22165	0.944153	0.935008	1.04175
-20	1.01211	0.034111	0.863158	1.09854	0.96433	1.03109	0.905404	1.01826	1.05974	1.27972	0.952368	0.931363	1.02924
-19.5	1.0045	0.0337632	0.83089	1.01279	0.953686	1.04414	0.929294	1.01476	1.05799	1.28074	0.967154	0.937742	1.02031
-19	1.00392	0.0309781	0.863158	0.972624	0.974974	1.04066	0.922127	1.02081	1.03527	1.26953	1.00987	0.941387	0.99274
-18.5	0.997067	0.0278617	0.855091	0.930289	0.983489	1.0424	0.929294	1.01412	1.0341	1.21146	1.04711	0.93683	0.983551
-18	0.992993	0.0240828	0.915593	0.906407	1.02394	1.03718	0.89346	1.00646	1.01022	1.16866	1.04985	0.947766	0.963384
-17.5	1.00435	0.0226273	0.943827	0.999762	1.06012	1.025	0.881515	1.00838	1.00672	1.17172	1.03944	0.956879	0.95445
-17	1.02316	0.0225383	1.01643	1.09312	1.11121	1.01108	0.917349	1.01603	0.997982	1.17172	1.00604	0.959613	0.954195
-16.5	1.02706	0.024032	1.0487	1.12568	1.10909	0.990195	0.940044	1.01252	0.982835	1.18191	0.99837	0.960525	0.947813
-16	1.02596	0.0258663	1.0729	1.16367	1.09844	0.977143	0.941238	1.02145	0.972931	1.16663	0.951272	0.978751	0.941176
-15.5	1.02474	0.0246751	1.10113	1.19407	1.04522	0.978884	0.990211	1.01794	0.955453	1.11772	0.960582	0.983307	0.927647
-15	1.01142	0.0217987	1.1213	1.15282	0.96433	1.02848	1.00932	1.01252	0.932149	1.03926	0.966059	0.97146	0.927902
-14.5	1.0013	0.021031	1.08903	1.13979	0.911111	1.05545	1.01291	1.00232	0.946714	0.981188	0.980846	0.969638	0.925349
-14	0.994898	0.0200892	1.03256	1.12568	0.911111	1.05806	1.05471	0.994345	0.989243	0.920055	0.944153	0.966904	0.947047
-13.5	0.99104	0.0190851	1.0245	1.10071	0.902596	1.05806	1.04516	0.982865	1.01429	0.908847	0.939224	0.960525	0.964661
-13	0.988457	0.0219807	1.0608	1.08443	0.904725	1.04936	0.999767	0.983503	1.06148	0.880318	0.889935	0.957791	1.00091
-12.5	0.989291	0.0185956	1.02046	1.04752	0.962201	1.02065	1.02007	0.981908	1.07838	0.915979	0.859267	0.968726	1.00704
-12	0.98064	0.0174839	0.931727	1.01387	0.99839	0.998896	1.01529	0.979676	1.06789	0.949602	0.84448	0.973283	1.01393
-11.5	0.979643	0.0138857	0.927693	1.00627	0.989875	1.00064	0.989017	0.973616	1.04342	0.998509	0.868029	0.984219	0.994783
-11	0.971278	0.0144719	0.891392	0.999762	0.979232	0.95452	1.01291	0.968514	1.02595	1.00055	0.875696	0.976928	0.998612
-10.5	0.972929	0.0133138	0.875258	0.993249	0.953686	0.961481	1.04755	0.964368	1.00556	1.0036	0.937033	0.981485	0.978956
-10	0.969613	0.0120528	0.927693	0.998676	0.926012	0.945819	1.06307	0.958628	0.984	0.932281	0.962773	0.979662	0.987124
-9.5	0.968527	0.0171431	0.972061	1.02581	0.91324	0.921456	1.06068	0.966282	0.98633	0.852808	0.964964	0.986953	1.00321
-9	0.971736	0.0239709	1.0124	1.03558	0.919626	0.924066	1.06546	0.984459	0.982835	0.771297	0.98687	0.980573	1.02593
-8.5	0.985172	0.0283986	1.08903	1.00519	0.962201	0.956261	1.06188	0.99594	0.980504	0.728504	1.03232	0.996066	1.02899
-8	0.992931	0.0292629	1.08903	0.960683	1.01968	0.978014	1.07143	1.00614	0.984583	0.725447	1.04711	1.00244	1.03767
-7.5	0.997614	0.0293837	1.05676	0.948742	1.03245	0.991065	1.05949	1.01507	0.995652	0.725447	1.07778	1.02341	1.04788
-7	0.998009	0.0278263	1.0729	0.902065	1.04948	1.00847	1.01768	1.02209	0.984583	0.764165	1.09585	1.02341	1.03741
-6.5	0.999607	0.0250658	1.06483	0.890124	1.03884	1.02935	1.00574	1.02113	0.984583	0.80492	1.10078	1.02614	1.02924
-6	0.99498	0.0199695	1.01643	0.903151	1.06651	1.01108	0.977072	1.02337	0.98633	0.847714	1.06573	1.02887	1.01852
-5.5	0.979343	0.0162948	0.94786	0.917262	1.0729	0.934508	0.987822	1.01667	0.961279	0.891526	1.01754	1.02705	0.998356
-5	0.970821	0.0138212	0.94786	0.933545	1.06651	0.911014	0.972294	1.00806	0.954288	0.922092	0.97975	1.01794	0.965682
-4.5	0.976325	0.013412	0.94786	0.947657	1.06012	0.898833	1.01529	0.995302	0.955453	0.965905	0.972083	1.02432	0.956748
-4	0.980102	0.0181873	0.951894	0.943315	1.08993	0.859677	1.00693	0.983821	0.978174	1.02704	0.940319	1.03434	0.965682
-3.5	0.983311	0.020179	1.02046	0.887953	1.06012	0.862288	1.0368	0.974254	0.978174	1.05149	0.927176	1.03799	0.979722
-3	0.980921	0.0200486	1.04063	0.84996	1.04309	0.882301	1.01052	0.967557	0.977591	1.03621	0.938129	1.0389	1.00525
-2.5	0.982288	0.0253819	1.08903	0.804369	1.04948	0.87534	0.996184	0.970109	0.966522	1.04028	0.940319	1.0471	1.02644
-2	1.04616	0.0276517	1.11727	0.832592	1.02181	1.06416	1.07143	1.00391	0.996817	1.0036	1.16814	1.1437	1.08438
-1.5	1.08568	0.0423109	1.18583	0.902065	0.98136	1.20598	1.13116	1.03963	0.996234	0.860959	1.29027	1.23574	1.11323
-1	1.12713	0.0571072	1.25037	1.03341	0.919626	1.33563	1.16938	1.07056	1.01954	0.759071	1.36475	1.32505	1.15101
-0.5	1.18011	0.0733772	1.41574	1.16693	0.887695	1.43657	1.22672	1.10915	1.07022	0.666352	1.40473	1.40707	1.19006
0	1.22275	0.0876312	1.45607	1.30045	0.866407	1.51923	1.34975	1.15157	1.12557	0.561407	1.41513	1.47633	1.22835
0.5	1.19965	0.092042	1.54481	1.36884	0.851506	1.38697	1.36527	1.15762	1.15237	0.471745	1.20922	1.45537	1.23244
1	1.19496	0.0981082	1.60531	1.39923	0.838733	1.29387	1.45247	1.16719	1.18674	0.436083	1.08819	1.42894	1.24775
1.5	1.18858	0.0972546	1.58111	1.41334	0.855763	1.21034	1.468	1.17676	1.22752	0.432008	1.0493	1.41071	1.24954
2	1.17635	0.0954806	1.50044	1.4166	0.853634	1.18075	1.49069	1.18154	1.22228	0.430989	1.02356	1.40616	1.2332
2.5	1.18428	0.0957579	1.55288	1.40683	0.868536	1.18771	1.49547	1.17485	1.22228	0.441178	1.04437	1.41254	1.22044
3	1.17886	0.0940464	1.54884	1.42094	0.887695	1.18075	1.50622	1.17325	1.1815	0.470726	1.00385	1.4098	1.18394
3.5	1.17096	0.0902824	1.54481	1.42094	0.894081	1.18945	1.4465	1.17803	1.13373	0.505368	0.985227	1.42074	1.16173
4	1.16555	0.0934665	1.58111	1.42203	0.91324	1.20076	1.47397	1.17931	1.06556	0.496198	0.96113	1.41071	1.11706
4.5	1.17205	0.0978181	1.65775	1.4242	0.938785	1.1938	1.50622	1.17357	1.04692	0.495179	0.936486	1.40433	1.11527
5	1.16623	0.100243	1.65775	1.43614	0.949429	1.13202	1.53489	1.17899	1.02303	0.482952	0.920604	1.40251	1.11016
5.5	1.15749	0.0997707	1.67388	1.41986	0.972845	1.11114	1.45127	1.18377	1.02478	0.456461	0.917865	1.41618	1.10429
6	1.14946	0.101898	1.69808	1.42203	1.00691	1.0833	1.38438	1.16911	1.00323	0.412649	0.94251	1.42621	1.09561
6.5	1.15277	0.105095	1.74245	1.41443	1.05587	1.05806	1.32944	1.15284	0.99973	0.383101	0.964416	1.46357	1.11655
7	1.14355	0.10703	1.74245	1.40466	1.06651	1.06677	1.25777	1.14295	0.985748	0.352535	0.955106	1.49182	1.11272
7.5	1.13007	0.107673	1.75052	1.39706	1.08141	1.09287	1.13116	1.1286	0.970018	0.350497	0.920604	1.50093	1.1071
8	1.1273	0.105053	1.73035	1.39815	1.0878	1.11462	1.09413	1.11043	0.970018	0.371894	0.914032	1.49182	1.11706
8.5	1.12382	0.100442	1.69001	1.36992	1.06438	1.14073	1.09294	1.09831	0.978757	0.400422	0.910746	1.48909	1.12676
9	1.11581	0.0929219	1.62548	1.35255	1.04735	1.14073	1.08577	1.09448	1.01255	0.460537	0.865839	1.46904	1.11961
9.5	1.1092	0.0885069	1.60128	1.34496	1.01329	1.13028	1.08338	1.0999	0.99973	0.500273	0.876792	1.45081	1.10046
10	1.10781	0.0857776	1.59321	1.32433	1.00265	1.13638	1.08935	1.09639	0.991574	0.52167	0.895412	1.44261	1.0923
10.5	1.11469	0.0844947	1.63355	1.30371	1.05161	1.12767	1.10249	1.09512	0.965357	0.575671	0.88172	1.44261	1.08208
11	1.13272	0.0832387	1.69001	1.30045	1.1474	1.11114	1.11444	1.09863	0.972931	0.656163	0.855981	1.43167	1.08106
11.5	1.15119	0.0861097	1.75858	1.29719	1.25171	1.12941	1.10249	1.10692	0.946131	0.708126	0.854885	1.43167	1.07596
12	1.1589	0.0881833	1.79892	1.27765	1.31345	1.12506	1.09532	1.10022	0.948462	0.72341	0.858719	1.42256	1.08413
12.5	1.16105	0.0894085	1.82312	1.28417	1.31132	1.10766	1.13355	1.09767	0.946714	0.719334	0.861457	1.40342	1.08311
13	1.15492	0.0911719	1.82312	1.29611	1.29429	1.08156	1.13474	1.11138	0.951957	0.654125	0.895412	1.38884	1.07264
13.5	1.14352	0.0897968	1.75052	1.31673	1.273	1.08852	1.15385	1.11649	0.946714	0.571595	0.931009	1.36788	1.06243
14	1.13298	0.0916099	1.71422	1.33953	1.19849	1.08678	1.1873	1.11075	0.943218	0.492122	0.958392	1.36059	1.07136
14.5	1.14684	0.0955154	1.74648	1.36558	1.22617	1.09983	1.2291	1.11202	0.949627	0.462575	0.993442	1.35603	1.07443
15	1.15116	0.0938417	1.72228	1.37969	1.2581	1.09635	1.23508	1.11425	0.957201	0.478877	0.994537	1.36424	1.06217
15.5	1.15298	0.0922947	1.67791	1.37535	1.25384	1.13725	1.26733	1.09384	0.95487	0.468688	1.00987	1.37608	1.06779
16	1.14915	0.0923175	1.68598	1.36992	1.24958	1.11201	1.24583	1.07981	0.951957	0.479896	0.997823	1.3934	1.07443
16.5	1.13876	0.0877411	1.62951	1.37535	1.22404	1.07547	1.22074	1.07311	0.963027	0.499254	1.00987	1.39431	1.06166
17	1.1275	0.0775754	1.50851	1.38729	1.23255	1.04153	1.16221	1.07056	0.96827	0.577709	0.990703	1.40251	1.06064
17.5	1.12435	0.0772281	1.52868	1.38946	1.23043	0.998896	1.13832	1.05972	0.956618	0.609294	0.984679	1.39887	1.07289
18	1.13173	0.0747177	1.56094	1.37644	1.27726	0.978884	1.11324	1.061	0.947297	0.681635	1.00932	1.38337	1.05962
18.5	1.13385	0.0737184	1.56901	1.38078	1.273	0.972793	1.10369	1.06706	0.940888	0.704051	1.0378	1.37517	1.04813
19	1.1342	0.074817	1.60531	1.3645	1.27939	0.973663	1.09055	1.07694	0.926906	0.709145	1.04163	1.35695	1.0512
19.5	1.14082	0.0812243	1.69001	1.3645	1.26236	0.992806	1.13474	1.08651	0.921663	0.676541	1.02192	1.35695	1.04099
20	1.14543	0.0785808	1.64161	1.35581	1.28577	1.02587	1.16221	1.10564	0.937975	0.665333	1.00713	1.36879	1.04354
20.5	1.14457	0.0785487	1.58111	1.37101	1.25171	1.0163	1.20283	1.13307	0.956036	0.621521	0.994537	1.40251	1.05962
21	1.14994	0.0793411	1.56901	1.37535	1.25597	1.04066	1.20641	1.14327	0.957783	0.608275	1.00439	1.43167	1.05656
21.5	1.15409	0.0832654	1.58918	1.38403	1.24958	1.06416	1.23388	1.14359	0.950792	0.591973	0.975917	1.46448	1.04737
22	1.14312	0.0827319	1.56094	1.38186	1.23894	1.04066	1.20163	1.12191	0.937975	0.581784	1.00001	1.47268	1.03588
22.5	1.14123	0.0832521	1.54884	1.39272	1.21765	1.0598	1.19088	1.10947	0.922828	0.579747	1.0159	1.49364	1.0221
23	1.14133	0.0840365	1.57708	1.39815	1.21552	1.0833	1.16102	1.0897	0.916419	0.592992	1.00659	1.49455	1.01929
23.5	1.13878	0.0835606	1.57708	1.40575	1.23255	1.08243	1.14549	1.08842	0.912341	0.616426	0.969345	1.48635	1.01035
24	1.14281	0.08269	1.57304	1.41334	1.26661	1.06851	1.12638	1.08619	0.912341	0.636804	0.990703	1.48818	1.00882
24.5	1.14584	0.0806107	1.54481	1.40683	1.26661	1.0833	1.1228	1.09735	0.914671	0.645974	1.00494	1.50093	1.01597
25	1.14441	0.0826666	1.58515	1.40249	1.26661	1.07199	1.09413	1.0897	0.910593	0.637823	1.02192	1.49364	1.01444
25.5	1.13866	0.08591	1.61741	1.40575	1.27087	1.02761	1.08577	1.08587	0.905933	0.628653	1.00439	1.49182	1.00116
26	1.13744	0.0833558	1.57708	1.4014	1.27087	1.05719	1.1013	1.07216	0.907098	0.618464	1.01754	1.48088	1.0078
26.5	1.1365	0.0785145	1.52868	1.39598	1.2581	1.09896	1.11324	1.06578	0.908845	0.648012	1.01206	1.46995	1.00193
27	1.13789	0.0774244	1.51254	1.41551	1.25384	1.11201	1.13474	1.06737	0.914089	0.66839	0.980298	1.46448	0.993506
27.5	1.13728	0.0750354	1.48028	1.42637	1.21978	1.13289	1.13474	1.07439	0.919915	0.699975	0.945796	1.47451	1.00142
28	1.14176	0.0735128	1.42784	1.42963	1.23255	1.16509	1.1443	1.07471	0.908845	0.6959	0.987965	1.48909	1.00346
28.5	1.1453	0.0768211	1.45204	1.43505	1.23255	1.15987	1.1443	1.07088	0.901272	0.689786	0.99837	1.52554	0.988656
29	1.15424	0.0808256	1.50448	1.43288	1.25171	1.15552	1.14071	1.07822	0.892533	0.675522	1.01863	1.5547	0.991719
29.5	1.14786	0.0847369	1.53271	1.39272	1.24746	1.16422	1.12877	1.07598	0.880881	0.625596	1.01206	1.57202	0.994017
30	1.14372	0.0891135	1.54481	1.36124	1.30067	1.13551	1.12638	1.08141	0.87622	0.57669	1.00385	1.58933	0.984827
30.5	1.13311	0.0889507	1.52464	1.35798	1.27513	1.10853	1.14071	1.08651	0.880298	0.570577	0.934843	1.5866	0.998356
31	1.1313	0.0882827	1.52464	1.3493	1.25171	1.09461	1.16341	1.10405	0.881464	0.571595	0.908008	1.57748	1.01801
31.5	1.12665	0.0887462	1.51658	1.35255	1.23894	1.04762	1.18969	1.10182	0.887872	0.561407	0.888292	1.57202	1.03639
32	1.13636	0.0868296	1.49641	1.38186	1.2432	1.04501	1.21716	1.10469	0.887872	0.581784	0.921151	1.5711	1.04967
32.5	1.14492	0.084931	1.48028	1.39598	1.25171	1.07808	1.22672	1.11936	0.888455	0.58586	0.945248	1.55743	1.06498
33	1.15149	0.08729	1.54481	1.38946	1.273	1.08069	1.19805	1.11617	0.886124	0.577709	0.979203	1.55926	1.06192
33.5	1.15127	0.0869926	1.55288	1.39272	1.3028	1.06938	1.15027	1.12286	0.884377	0.601143	0.978107	1.56108	1.04839
34	1.13795	0.0860485	1.51658	1.39489	1.29003	1.0511	1.10488	1.13084	0.880298	0.606238	0.94251	1.55835	1.04175
34.5	1.14184	0.0872553	1.54884	1.38838	1.31771	1.05806	1.07621	1.13403	0.88729	0.620502	0.926628	1.56108	1.0415
35	1.15152	0.0886033	1.60935	1.38946	1.30493	1.08069	1.07741	1.12159	0.897194	0.636804	0.957844	1.57293	1.01852
35.5	1.15665	0.0858019	1.58515	1.39272	1.31345	1.11723	1.04993	1.13211	0.901272	0.664314	0.981393	1.57293	1.01265
36	1.16954	0.0871977	1.62145	1.39055	1.32196	1.12332	1.07024	1.13084	0.911176	0.649031	1.03342	1.58295	1.03001
36.5	1.189	0.0906329	1.66985	1.39489	1.3688	1.15117	1.08935	1.13339	0.914089	0.64088	1.07723	1.603	1.03639
37	1.18903	0.0911758	1.67791	1.4014	1.36241	1.10157	1.08218	1.15061	0.926906	0.646993	1.06464	1.61576	1.0489
37.5	1.18322	0.0900027	1.65775	1.40683	1.37518	1.05023	1.05471	1.1471	0.935645	0.66839	1.02521	1.61029	1.08413
38	1.18845	0.0906268	1.67791	1.40683	1.37944	1.03457	1.06785	1.13849	0.956036	0.67756	1.01316	1.6194	1.10174
38.5	1.18224	0.0920625	1.69001	1.39706	1.37305	1.01717	1.05949	1.13084	0.972931	0.660239	0.991799	1.61485	1.09715
39	1.17498	0.0920913	1.69405	1.39272	1.33686	0.995416	1.04277	1.11967	0.995652	0.644955	0.987965	1.60482	1.10991
39.5	1.17199	0.0915171	1.66581	1.39163	1.34538	1.01282	1.03321	1.09193	0.99973	0.625596	0.995084	1.60391	1.12676
40	1.17193	0.0917681	1.66178	1.39272	1.32835	1.00151	1.04516	1.08141	1.01663	0.608275	1.00659	1.60756	1.14131
40.5	1.17685	0.093772	1.70212	1.39815	1.31558	1.00151	1.05113	1.07216	1.01138	0.602162	1.03561	1.60938	1.14616
41	1.18105	0.0931685	1.71422	1.40792	1.29429	1.04588	1.04516	1.05972	0.999147	0.629672	1.01754	1.61758	1.16045
41.5	1.1803	0.0905261	1.67388	1.41769	1.31345	1.07895	1.05471	1.04792	0.978174	0.660239	0.985774	1.61667	1.15586
42	1.17704	0.0903023	1.69001	1.41443	1.28364	1.09896	1.06546	1.04983	0.95021	0.672465	0.981941	1.60756	1.13288
42.5	1.161	0.0883351	1.63355	1.41551	1.2581	1.10418	1.05471	1.0543	0.898941	0.682654	0.96825	1.60391	1.09689
43	1.14844	0.0840394	1.54078	1.41443	1.23255	1.09809	1.05232	1.0543	0.881464	0.708126	0.955654	1.61485	1.0803
43.5	1.1397	0.080242	1.45607	1.409	1.2283	1.07112	1.05591	1.04792	0.877968	0.717296	0.981393	1.62032	1.07136
44	1.13142	0.078359	1.43187	1.38729	1.20914	1.04414	1.05113	1.05111	0.877385	0.722391	0.995084	1.61849	1.05758
44.5	1.13519	0.0779023	1.43187	1.38838	1.22191	1.04327	1.05949	1.0527	0.883794	0.725447	1.0033	1.61758	1.05937
45	1.1537	0.0801761	1.52464	1.38838	1.2432	1.05893	1.0571	1.05749	0.90535	0.730542	1.03178	1.6194	1.07392
45.5	1.15599	0.0813295	1.53674	1.38512	1.28364	1.07286	1.06188	1.05717	0.906515	0.721372	1.00166	1.6112	1.07774
46	1.15553	0.0829948	1.54884	1.38838	1.31132	1.06851	1.0583	1.06291	0.894863	0.707107	0.990156	1.59936	1.08106
46.5	1.16932	0.0859238	1.60128	1.40357	1.33048	1.1094	1.05232	1.06737	0.890785	0.697937	1.02849	1.60391	1.07698
47	1.17585	0.0865855	1.61338	1.40683	1.3688	1.11723	1.03082	1.06514	0.891368	0.715258	1.04985	1.60665	1.06907
47.5	1.17076	0.0853214	1.55691	1.41117	1.39221	1.08765	1.03082	1.06387	0.887872	0.726466	1.03506	1.61849	1.06779
48	1.17261	0.0860825	1.54481	1.41117	1.3986	1.09548	1.03082	1.06706	0.887872	0.724428	1.04054	1.64036	1.05758
48.5	1.17191	0.0849113	1.54481	1.42203	1.39221	1.08765	1.04635	1.06355	0.890202	0.747863	1.01863	1.63034	1.04737
49	1.1559	0.0801125	1.46414	1.41986	1.36454	1.07286	1.07502	1.04696	0.889037	0.758052	0.966607	1.60027	1.05758
49.5	1.14287	0.0754847	1.38751	1.41334	1.29216	1.03631	1.12519	1.04728	0.896028	0.754995	0.951272	1.58842	1.07902
50	1.14584	0.0731556	1.38347	1.41009	1.24107	1.11549	1.16699	1.03325	0.893698	0.733598	0.98687	1.56473	1.07494
50.5	1.1433	0.0712652	1.38751	1.41334	1.21552	1.13028	1.18849	1.03134	0.893698	0.739712	0.962773	1.52463	1.08898
51	1.14414	0.071654	1.40364	1.41226	1.20914	1.13986	1.20044	1.03421	0.90302	0.724428	0.954011	1.50914	1.09536
51.5	1.15428	0.0755176	1.47624	1.41443	1.21765	1.18597	1.19566	1.05175	0.906515	0.709145	0.939224	1.51278	1.0877
52	1.1561	0.080391	1.54884	1.42311	1.24107	1.22078	1.17296	1.05398	0.900107	0.699975	0.889388	1.49091	1.07596
52.5	1.14701	0.0798854	1.51254	1.42746	1.2581	1.18249	1.15744	1.06482	0.902437	0.717296	0.81874	1.48453	1.09127
53	1.14216	0.0811146	1.52464	1.43831	1.23681	1.16509	1.12877	1.07407	0.90535	0.707107	0.806692	1.4818	1.0951
53.5	1.14325	0.0821615	1.53271	1.43397	1.20275	1.18858	1.09413	1.09321	0.899524	0.698956	0.820383	1.50822	1.10327
54	1.13843	0.0794624	1.48431	1.42637	1.20062	1.1503	1.07024	1.09448	0.886707	0.702013	0.867481	1.5301	1.11016
54.5	1.13359	0.0780381	1.42784	1.41986	1.20701	1.15726	1.05591	1.08874	0.869812	0.70507	0.886102	1.54832	1.10353
55	1.12954	0.0790722	1.45607	1.409	1.21127	1.11027	1.04038	1.10118	0.859325	0.70507	0.889935	1.54832	1.09408
55.5	1.12813	0.0753976	1.41574	1.39923	1.2134	1.06677	1.06307	1.10182	0.863986	0.722391	0.921699	1.5465	1.09485
56	1.12506	0.0720242	1.34717	1.39923	1.20914	1.03544	1.08816	1.09639	0.875638	0.736655	0.939772	1.55014	1.09791
56.5	1.12594	0.0703033	1.3149	1.40466	1.19637	1.02674	1.10488	1.10819	0.909428	0.74175	0.920056	1.54741	1.11093
57	1.13342	0.0692816	1.28667	1.40575	1.20701	0.980624	1.11205	1.13434	0.955453	0.751938	0.940867	1.56564	1.12727
57.5	1.13978	0.067524	1.25844	1.38946	1.20701	1.02239	1.11802	1.1487	0.972348	0.746844	0.964964	1.57931	1.13008
58	1.1058	0.059433	1.14953	1.21904	1.08141	1.10766	1.12519	1.12127	0.979922	0.700994	1.02959	1.5383	1.11093
58.5	1.06594	0.0550253	1.04063	1.01713	1.01542	1.13638	1.16102	1.10532	0.951957	0.707107	1.03616	1.47724	1.07698
59	1.04261	0.0581228	1.0124	0.88144	0.928141	1.11027	1.19685	1.07981	0.946131	0.68673	1.11447	1.44261	1.06983
59.5	1.01732	0.0656471	0.931727	0.753349	0.840862	1.15639	1.21955	1.08332	0.950792	0.649031	1.13035	1.39796	1.07723
60	0.989658	0.0739209	0.838957	0.624173	0.728037	1.13899	1.2303	1.07216	1.00847	0.645974	1.13638	1.35877	1.10404
60.5	1.01193	0.0715786	0.875258	0.61766	0.770613	1.12158	1.22552	1.10851	1.1011	0.702013	1.05368	1.37062	1.1847
61	1.03085	0.0712461	0.879292	0.652396	0.796158	1.09374	1.20641	1.12446	1.20072	0.731561	1.01918	1.38975	1.24571
61.5	1.04202	0.0759887	0.810723	0.588351	0.834476	1.16857	1.20641	1.16623	1.26598	0.817147	0.952915	1.37426	1.27711
62	1.04108	0.08036	0.762322	0.54493	0.819574	1.16683	1.17655	1.17261	1.33123	0.860959	0.964964	1.35057	1.30136
62.5	1.04417	0.080184	0.721987	0.550357	0.87918	1.27211	1.05949	1.18569	1.34463	0.901715	0.95182	1.3214	1.29753
63	1.03836	0.0752642	0.709887	0.585094	0.932399	1.28256	0.950794	1.18154	1.3219	0.954697	0.946891	1.28313	1.27303
63.5	1.04944	0.0705217	0.754255	0.674106	0.968588	1.31823	0.828958	1.19047	1.32423	1.03111	0.943605	1.2485	1.26179
64	1.04911	0.0675042	0.822823	0.766375	1.00052	1.30344	0.69279	1.17198	1.31433	1.05659	0.925533	1.23301	1.25286
64.5	1.05405	0.0652797	0.915593	0.832592	1.09206	1.30692	0.609177	1.14678	1.26656	1.09734	0.890483	1.19929	1.2378
65	1.05723	0.0569502	0.976094	0.884697	1.12825	1.24949	0.645011	1.11043	1.23277	1.12689	0.883363	1.17286	1.21967
65.5	1.04659	0.0485927	1.00433	0.948742	1.08993	1.20772	0.662928	1.09065	1.18674	1.05353	0.915127	1.15737	1.19542
66	1.01987	0.0431921	0.996262	0.931374	1.04522	1.19902	0.695178	1.06227	1.11508	0.940432	0.934295	1.13459	1.16479
66.5	1.01331	0.0366404	0.984161	0.958512	1.04309	1.15813	0.75968	1.04314	1.08188	0.877261	0.967702	1.11271	1.1602
67	1.00064	0.0312518	0.963994	0.938973	0.987747	1.09896	0.808653	1.03006	1.06789	0.867073	0.990703	1.10907	1.14386
67.5	1.00131	0.0296704	0.988195	0.876013	0.949429	1.05632	0.861209	1.02273	1.06265	0.875224	1.07997	1.10542	1.13722
68	1.00838	0.0252474	0.988195	0.82825	0.98136	1.01021	0.950794	1.00455	1.07488	0.955716	1.07614	1.09813	1.12395
68.5	1.01712	0.0306294	1.03256	0.792428	1.03671	0.922326	0.93646	0.989881	1.10285	1.03417	1.10845	1.10542	1.12701
69	1.00904	0.0353477	1.0366	0.771803	1.04097	0.891002	0.864792	0.981908	1.09761	1.11466	1.10352	1.09358	1.10302
69.5	1.00086	0.0328067	1.00433	0.829335	1.058	0.866638	0.839709	0.965644	1.07721	1.12281	1.07833	1.0872	1.0803
70	0.985269	0.0363005	0.931727	0.921604	1.10483	0.799639	0.771624	0.965963	1.07255	1.11161	0.989608	1.08264	1.08617
70.5	0.988551	0.0363227	0.93576	1.00736	1.11334	0.777886	0.756096	0.980632	1.05974	1.06677	1.02301	1.07444	1.07902
71	0.995194	0.0367817	0.963994	1.11048	1.09206	0.764834	0.760874	1.00009	1.05391	1.05964	1.01973	1.0471	1.07443
71.5	0.998341	0.0355791	0.976094	1.1767	1.06225	0.770055	0.799097	0.997853	1.05449	1.04028	1.00385	1.03252	1.06856
72	1.00389	0.0392497	1.04063	1.21795	1.02394	0.760484	0.774013	1.00646	1.06848	1.04742	1.02575	1.01885	1.05886
72.5	0.998456	0.0380141	1.0608	1.22446	0.970717	0.790938	0.768041	1.00614	1.05566	1.03926	1.02794	1.007	1.03205
73	0.979268	0.0410418	1.085	1.18539	0.951558	0.788328	0.688012	0.993707	1.04401	1.03417	0.984679	0.994243	1.02286
73.5	0.962784	0.0375619	1.03256	1.15825	0.928141	0.809211	0.685623	0.978719	1.0341	0.998509	0.957844	0.987864	1.0198
74	0.961632	0.0417491	1.04466	1.17453	0.932399	0.770925	0.665317	0.997534	1.04459	0.949602	0.978655	0.98513	1.0346
74.5	0.957663	0.0432455	0.996262	1.1767	0.949429	0.763094	0.648594	1.00072	1.04459	0.939414	0.967154	0.978751	1.06958
75	0.969762	0.0427449	0.988195	1.20384	0.934528	0.797029	0.6689	1.01189	1.04168	0.941451	1.02575	0.968726	1.0854
75.5	0.976962	0.0460195	1.00433	1.24509	0.919626	0.795289	0.666511	1.03421	1.0475	0.929225	1.03999	0.973283	1.09153
76	0.984604	0.0459934	1.04466	1.24292	0.906854	0.809211	0.671289	1.0527	1.04692	0.935338	1.04383	0.978751	1.09817
76.5	0.987063	0.0419311	1.04466	1.23423	0.883437	0.842275	0.708318	1.04537	1.0376	0.957753	1.0493	0.974194	1.08055
77	0.990334	0.0396025	1.0729	1.23206	0.838733	0.867508	0.765652	1.05813	1.02187	0.95164	1.06354	0.958702	1.06294
77.5	0.980349	0.0416416	1.1334	1.21578	0.813188	0.832704	0.764457	1.05621	0.998565	0.938395	1.03232	0.953234	1.04558
78	0.970449	0.0398204	1.07693	1.21361	0.811059	0.830963	0.765652	1.05876	0.971183	0.949602	1.01863	0.935008	1.04354
78.5	0.962883	0.0396798	1.07693	1.19733	0.823832	0.792678	0.78118	1.05845	0.951375	0.943489	1.02192	0.899467	1.04507
79	0.946385	0.0356004	1.01643	1.15391	0.872793	0.762224	0.783569	1.05717	0.917002	0.943489	0.984131	0.886708	1.03282
79.5	0.936153	0.0338206	0.976094	1.12785	0.917497	0.725679	0.797902	1.04792	0.909428	0.958772	0.932652	0.883063	1.02082
80	0.93917	0.0313613	0.93576	1.11591	0.943043	0.747432	0.812236	1.04505	0.911758	0.97915	0.949082	0.87395	1.0175
80.5	0.960822	0.0284049	1.03256	1.09854	0.962201	0.799639	0.842098	1.02911	0.910011	1.04538	0.977012	0.870305	1.00219
81	0.979702	0.0319107	1.0245	1.14522	0.979232	0.822262	0.881515	1.01348	0.911758	1.16153	0.967154	0.883974	0.986103
81.5	0.998129	0.0424941	1.0729	1.20384	0.962201	0.841405	0.852848	1.00359	0.917002	1.28583	0.97756	0.88124	0.980998
82	1.0154	0.053364	1.0971	1.2364	0.949429	0.871859	0.819403	0.996578	0.917584	1.41931	1.01973	0.879418	0.962619
82.5	1.03048	0.0633073	1.13743	1.25269	0.966459	0.852716	0.812236	0.994345	0.922828	1.5375	1.01809	0.885797	0.955216
83	1.03486	0.0689808	1.1213	1.26354	0.977103	0.840535	0.801486	0.996578	0.917002	1.60475	1.02082	0.893087	0.947303
83.5	1.03148	0.0686559	1.0729	1.25703	0.974974	0.894482	0.750124	0.99881	0.910593	1.59761	1.06026	0.898555	0.930965
84	1.03834	0.066453	1.05273	1.26897	0.992004	0.932767	0.768041	1.002	0.912341	1.58131	1.08435	0.893999	0.933263
84.5	1.04031	0.0620976	1.0487	1.26463	1.02181	0.959741	0.765652	1.00901	0.919332	1.53546	1.07723	0.900378	0.941431
85	1.03707	0.0570994	1.03256	1.2668	1.03671	0.980624	0.750124	1.0138	0.950792	1.46516	1.06464	0.888531	0.958024
85.5	1.02092	0.0512338	1.0003	1.24509	1.01755	0.982364	0.731012	1.02081	0.983417	1.38161	1.01316	0.885797	0.969
86	1.01095	0.046789	1.05273	1.21687	0.985618	0.946689	0.721457	1.02081	1.02245	1.30825	0.973178	0.877595	0.994783
86.5	0.99324	0.038618	1.01643	1.16476	0.940914	0.95278	0.72504	1.02432	1.05449	1.19108	0.961678	0.88124	1.01291
87	0.982761	0.0363557	0.980128	1.15825	0.900467	0.994546	0.716679	1.01603	1.06906	1.10447	0.964416	0.877595	1.02873
87.5	0.975762	0.0337826	0.931727	1.18973	0.881308	0.978014	0.75968	1.00423	1.04575	1.06677	0.961678	0.896733	1.01776
88	0.981998	0.0349689	0.895425	1.22338	0.889823	0.995416	0.783569	0.992113	1.02245	1.079	1.01809	0.89491	1.0078
88.5	0.973086	0.0343784	0.855091	1.22121	0.911111	1.0163	0.797902	0.988605	0.985748	1.08002	0.97756	0.893999	0.976403
89	0.975127	0.0335613	0.895425	1.20058	0.917497	1.04849	0.794319	0.985097	0.963027	1.10447	0.984679	0.890353	0.942452
89.5	0.972566	0.031226	0.951894	1.17019	0.928141	1.05893	0.801486	0.987967	0.932149	1.1004	0.965511	0.884886	0.91667
90	0.970175	0.0379117	1.0729	1.13328	0.883437	1.09983	0.742957	0.991475	0.912924	1.12995	0.929914	0.872127	0.903141
90.5	0.969998	0.0427707	1.1334	1.13979	0.877051	1.09287	0.72504	0.990518	0.914089	1.1544	0.868029	0.87395	0.900844
91	0.980921	0.044717	1.14147	1.18864	0.874922	1.06416	0.736985	0.996578	0.919915	1.1921	0.885006	0.87395	0.916415
91.5	0.988073	0.0490227	1.12937	1.26897	0.932399	1.00064	0.727429	0.994664	0.909428	1.22878	0.864196	0.879418	0.933518
92	0.999173	0.0528883	1.09306	1.33302	0.985618	0.945819	0.726235	0.992432	0.937975	1.27259	0.868577	0.89491	0.940666
92.5	1.00927	0.0535617	1.02853	1.38078	1.0878	0.910144	0.766846	0.993707	0.969435	1.25323	0.84448	0.898555	0.96849
93	1.0109	0.0496129	0.992228	1.38512	1.08354	0.908404	0.81343	0.994983	0.976426	1.21349	0.869124	0.900378	0.982785
93.5	0.998852	0.0471266	0.992228	1.34387	1.08567	0.895352	0.782374	0.995302	0.977591	1.16968	0.850504	0.907668	0.987124
94	0.980126	0.041474	1.04063	1.2668	1.03032	0.874469	0.771624	1.00774	0.992739	1.09123	0.815454	0.904023	0.986359
94.5	0.968655	0.0375066	1.04466	1.22121	0.996262	0.87621	0.779985	1.01539	1.00206	1.01481	0.79793	0.9022	1.00448
95	0.95716	0.0344366	1.0245	1.20058	0.934528	0.866638	0.812236	1.02018	1.02303	0.948583	0.801763	0.9022	0.994527
95.5	0.94909	0.0378143	0.992228	1.22446	0.936656	0.840535	0.818208	1.02209	1.04459	0.888469	0.778762	0.905846	0.988146
96	0.954515	0.0379257	0.939793	1.25594	0.934528	0.870989	0.886293	1.01476	1.06382	0.833449	0.806692	0.90858	0.984827
96.5	0.960023	0.0388176	0.911559	1.28634	0.943043	0.882301	0.912571	0.997215	1.06032	0.843638	0.81655	0.916782	0.989932
97	0.971867	0.0369086	0.980128	1.29936	0.934528	0.887521	0.932877	0.991475	1.0341	0.883375	0.836813	0.926806	0.983551
97.5	0.979987	0.0305771	0.955927	1.26354	0.9473	0.914495	0.941238	0.988924	1.01721	0.923111	0.891031	0.935919	1.00116
98	0.987125	0.0249478	0.992228	1.21252	0.945171	0.937988	0.911377	0.9902	1.00847	0.98832	0.927176	0.932274	1.01265
98.5	0.995316	0.0252345	1.05878	1.19136	0.9473	0.940816	0.885397	0.994584	0.999147	1.04054	0.934432	0.934096	1.02203
99	1.0084	0.0236079	1.05542	1.18502	0.940204	0.974533	0.903812	1.00508	1.00594	1.07662	0.972996	0.940172	1.03256
99.5	1.00857	0.0212706	0.988195	1.15065	0.936656	0.994111	0.913765	1.00535	1.03556	1.08766	1.00494	0.92954	1.04788
100	1.00685	0.0329857	1.1092	1.1615	0.904725	0.987585	0.800291	0.998172	1.03119	1.15134	1.0022	0.906757	1.02235
