# Supplementary material for: Cerebellar Purkinje cell activity modulates aggressive behavior
Source: eLife. 2020 Apr 28;9:e53229. doi: 10.7554/eLife.53229 (PMC7202893; doi:10.7554/eLife.53229)
Supplement: Figure 2—source data 1. [file elife-53229-fig2-data1.xlsx]

## Sheet: Sheet1
This source data file will be provided when the final version of the manuscript is published.
