# Supplementary material for: Cerebellar Purkinje cell activity modulates aggressive behavior
Source: eLife. 2020 Apr 28;9:e53229. doi: 10.7554/eLife.53229 (PMC7202893; doi:10.7554/eLife.53229)
Supplement: Figure 2—source data 3. [file elife-53229-fig2-data3.xlsx]

## Sheet: Fig2A-Rotarod
		Animal ID	Time to fall (s)				Animal ID	Time to fall (s)
			Light off	Light on				Light off	Light on
		9_94	NA	62			9_42	38	17
		9_101	94	46			9_76	52	19
		9_99	58	71			9_93	49	20
		9_137	NA	57			9_104	36	37
		9_138	76	46			9_121	22	44
		9_141	46	36			9_135	30	57
		9_159	92	57			9_150	16	38
		9_100	17	77			9_152	27	51
		9_102	70	59			9_120	26	48
		9_139	37	102			9_122	29	44
		9_142	59	62			9_136	33	52
		9_160	43	55			9_151	43	66
		9_98	37	51			9_74	62	14
							9_77	68	43
							9_103	60	40
							9_107	74	52
