# Supplementary material for: Cerebellar Purkinje cell activity modulates aggressive behavior
Source: eLife. 2020 Apr 28;9:e53229. doi: 10.7554/eLife.53229 (PMC7202893; doi:10.7554/eLife.53229)
Supplement: Figure 3—figure supplement 3—source data 1. [file elife-53229-fig3-figsupp3-data1.xlsx]

## Sheet: Event counts
Behavior counts by Assay															Behavior counts by Animal
	Attack		Social		Grooming		Tail Rattles		Lateral Threat		Chase				Attack		Social		Grooming		Tail Rattles		Lateral Threat		Chase
Light	Off	On	Off	On	Off	On	Off	On	Off	On	Off	On			Off	On	Off	On	Off	On	Off	On	Off	On	Off	On
9B	4	1	14	10	3	5	0	0	0	0	0	0		9B	3.5	2	10.5	9.5	3.5	4	0	0.5	2	0	0	0.5
9D	3	3	7	9	4	3	0	1	4	0	0	1		9D
13A	7	4	6	5	4	7	0	0	5	2	1	2		13A	4.66667	1.66667	11.3333	13	2.33333	4.33333	0.666667	0	1.66667	0.666667	0.666667	0.666667
13B	3	1	16	13	3	4	1	0	0	0	0	0		13B
13D	4	0	12	21	0	2	1	0	0	0	1	0		13D
14D	7	5	8	10	1	4	0	0	6	5	0	0		14D	7	5	8	10	1	4	0	0	6	5	0	0
15B	1	3	11	8	1	2	0	0	0	2	1	0		15B	1.66667	2.66667	12	9	2.33333	4	0	0	0.333333	1.33333	0.666667	0.333333
15C	1	2	11	10	1	3	0	0	0	0	0	1		15C
15D	3	3	14	9	5	7	0	0	1	2	1	0		15D
16A	4	3	16	14	7	5	1	1	1	1	0	0		16A	2.66667	3	10.3333	12.3333	4.66667	3.66667	1	1	0.666667	1.33333	0	0.333333
16B	2	2	9	10	2	4	0	0	0	0	0	1		16B
16D	2	4	6	13	5	2	2	2	1	3	0	0		16D
23A	4	3	8	9	1	3	3	1	5	3	1	0		23A	6	2.5	9	10	3	4	1.5	0.5	5.5	3.5	0.5	0
23B	8	2	10	11	5	5	0	0	6	4	0	0		23B
25A	4	5	10	9	1	0	1	0	0	1	0	0		25A	4.33333	3.33333	10	7.66667	3.33333	2.33333	1.33333	1	4.33333	2.66667	0.666667	0
25B	3	2	9	8	3	2	0	1	5	3	0	0		25B
25C	6	3	11	6	6	5	3	2	8	4	2	0		25C
26A	3	1	12	10	4	3	0	0	0	0	0	0		26A	3.5	3	11	10	4	4	0	0	0.5	1	0	0
26C	4	5	10	10	4	5	0	0	1	2	0	0		26C
27A	4	3	10	10	2	3	0	0	0	0	0	0		27A	5.8	3.8	8.2	6.4	5.8	8	0.4	0	2	2	0.2	0.2
27B	10	4	4	3	4	7	1	0	1	0	0	0		27B
27C	3	4	13	6	4	13	0	0	3	0	0	0		27C
27D	8	4	5	3	8	6	1	0	5	4	0	0		27D
27E	4	4	9	10	11	11	0	0	1	6	1	1		27E
29A	3	2	8	9	4	6	1	1	0	0	0	1		29A	3	2	8	9	4	6	1	1	0	0	0	1
30A	6	3	8	7	1	2	0	0	4	2	1	0		30A	4.75	2.75	5.5	6.25	4.5	5	0.25	1	2.75	1.75	0.5	0
30B	4	2	3	4	8	13	0	2	1	1	1	0		30B
30C	5	3	3	7	4	1	1	2	3	1	0	0		30C
30D	4	3	8	7	5	4	0	0	3	3	0	0		30D
Isa197A	4	1	11	11	2	3	0	0	1	0	0	0		Isa197A	5.5	1.5	10	8	4	5	0	0	4	0.5	0	0.5
Isa197C	7	2	9	5	6	7	0	0	7	1	0	1		Isa197C
AVG	4.35484	2.80645	9.3871	8.93548	3.83871	4.74194	0.516129	0.419355	2.32258	1.6129	0.322581	0.258065		AVG	4.36528	2.76806	9.48889	9.2625	3.53889	4.52778	0.5125	0.416667	2.47917	1.64583	0.266667	0.294444
SEM	0.378305	0.229161	0.602285	0.637427	0.447446	0.562192	0.1529	0.129301	0.445738	0.309969	0.097132	0.092373		SEM	0.449993	0.282801	0.525804	0.594384	0.36549	0.405057	0.163828	0.135307	0.593005	0.427895	0.0879049	0.0939978
P	0.000357168		0.448556		0.0457849		0.475905		0.0677203		0.624998			P	0.00334295		0.674753		0.0197528		0.49362		0.0523786		0.848357
		AVG	SEM	Mouse1	Mouse2	Mouse3	Mouse4	Mouse5	Mouse6	Mouse7	Mouse8	Mouse9	Mouse10	Mouse11	Mouse12
Attack	Off	4.36528	0.449993	3.5	4.66667	7	1.66667	2.66667	6	4.33333	3.5	5.8	3	4.75	5.5
	On	2.76806	0.282801	2	1.66667	5	2.66667	3	2.5	3.33333	3	3.8	2	2.75	1.5
Social	Off	9.48889	0.525804	10.5	11.3333	8	12	10.3333	9	10	11	8.2	8	5.5	10
	On	9.2625	0.594384	9.5	13	10	9	12.3333	10	7.66667	10	6.4	9	6.25	8
Grooming	Off	3.53889	0.36549	3.5	2.33333	1	2.33333	4.66667	3	3.33333	4	5.8	4	4.5	4
	On	4.52778	0.405057	4	4.33333	4	4	3.66667	4	2.33333	4	8	6	5	5
Tail Rattles	Off	0.5125	0.163828	0	0.666667	0	0	1	1.5	1.33333	0	0.4	1	0.25	0
	On	0.416667	0.135307	0.5	0	0	0	1	0.5	1	0	0	1	1	0
Lateral Threat	Off	2.47917	0.593005	2	1.66667	6	0.333333	0.666667	5.5	4.33333	0.5	2	0	2.75	4
	On	1.64583	0.427895	0	0.666667	5	1.33333	1.33333	3.5	2.66667	1	2	0	1.75	0.5
Chase	Off	0.266667	0.0879049	0	0.666667	0	0.666667	0	0.5	0.666667	0	0.2	0	0.5	0
	On	0.294444	0.0939978	0.5	0.666667	0	0.333333	0.333333	0	0	0	0.2	1	0	0.5

## Sheet: Event duration
Behavior counts by Assay															Behavior counts by Animal
	Attack		Social		Grooming		Tail Rattles		Lateral Threat		Chase				Attack		Social		Grooming		Tail Rattles		Lateral Threat		Chase
Light	Off	On	Off	On	Off	On	Off	On	Off	On	Off	On			Off	On	Off	On	Off	On	Off	On	Off	On	Off	On
9B	14.611	10.1	49.623	42.8	6.802	10.592	0	0	0	0	0	0		9B	14.0175	14.8195	35.768	24.3995	6.019	7.559	0	0.2625	3.4635	0	0	0.412
9D	13.424	19.539	21.913	5.999	5.236	4.526	0	0.525	6.927	0	0	0.824		9D
13A	46.57	28.145	32.843	13.568	20.515	11.908	0	0	18.669	11.298	2.501	5.586		13A	32.319	10.0877	49.1233	52.678	9.93933	8.615	1.00833	0	6.223	3.766	1.24167	1.862
13B	11.865	2.118	70.265	80.964	9.303	11.363	1	0	0	0	0	0		13B
13D	38.522	0	44.262	63.502	0	2.574	2.025	0	0	0	1.224	0		13D
14D	33.563	32.903	47.615	43.879	2.025	6.215	0	0	22.668	28.334	0	0		14D	33.563	32.903	47.615	43.879	2.025	6.215	0	0	22.668	28.334	0	0
15B	6.466	11.017	95.444	17.453	1.3	2.55	0	0	0	11.499	2.326	0		15B	9.51967	13.1413	73.835	17.755	3.47567	10.085	0	0	1.59967	5.02767	1.301	0.517
15C	2.276	11.807	62.895	13.473	2.6	7.499	0	0	0	0	0	1.551		15C
15D	19.817	16.6	63.166	22.339	6.527	20.206	0	0	4.799	3.584	1.577	0		15D
16A	20.975	16.292	119.181	97.94	15.851	9.074	0.525	0.525	1.976	2.851	0	0		16A	11.7023	14.6997	74.9103	52.0063	9.51033	6.675	0.607667	0.775	0.833667	3.56133	0	0.508
16B	6.808	15.784	88.072	40.661	3.327	3.026	0	0	0	0	0	1.524		16B
16D	7.324	12.023	17.478	17.418	9.353	7.925	1.298	1.8	0.525	7.833	0	0		16D
23A	26.045	8.5	54.787	61.448	0.55	5.954	2.901	0.298	16.429	5.093	5.043	0		23A	38.289	11.172	56.8935	63.4155	5.4255	7.053	1.4505	0.149	16.215	7.074	2.5215	0
23B	50.533	13.844	59	65.383	10.301	8.152	0	0	16.001	9.055	0	0		23B
25A	52.651	59.029	75.112	63.045	3.7	0	0.827	0	0	2.827	0	0		25A	38.1657	32.694	49.749	38.2313	5.76867	8.54333	0.975333	0.768667	9.702	6.34467	1.00033	0
25B	30.649	3.077	21.265	30.83	3.876	5.682	0	0.85	11.349	4	0	0		25B
25C	31.197	35.976	52.87	20.819	9.73	19.948	2.099	1.456	17.757	12.207	3.001	0		25C
26A	8.36	1.269	118.435	77.197	20.315	15.082	0	0	0	0	0	0		26A	29.304	16.672	90.8215	53.7115	15.2825	12.98	0	0	1.0875	2.968	0	0
26C	50.248	32.075	63.208	30.226	10.25	10.878	0	0	2.175	5.936	0	0		26C
27A	26.49	22.45	74.494	53.883	1.423	8.507	0	0	0	0	0	0		27A	32.4276	22.9522	44.5636	27.1488	20.745	18.3002	0.2598	0	3.5612	3.8022	0.105	0.31
27B	44.391	12.14	20.887	8.475	22.373	12.167	0.524	0	1.925	0	0	0		27B
27C	16.449	35.027	48.536	21.252	17.484	20.402	0	0	6.906	0	0	0		27C
27D	57.241	20.509	29.592	13.651	41.595	11.398	0.775	0	7.127	9.276	0	0		27D
27E	17.567	24.635	49.309	38.483	20.85	39.027	0	0	1.848	9.735	0.525	1.55		27E
29A	24.656	13.901	61.221	67.21	4.734	12.267	1.799	1.551	0	0	0	2.279		29A	24.656	13.901	61.221	67.21	4.734	12.267	1.799	1.551	0	0	0	2.279
30A	53.485	26.811	64.244	65.932	1.55	3.202	0	0	10.857	4.447	1.075	0		30A	45.0345	29.1015	41.2905	53.46	16.9955	24.0217	0.13125	0.918	6.27975	3.51975	0.5815	0
30B	12.902	23.012	34.385	11.921	27.698	66.852	0	1.849	1.051	1.549	1.251	0		30B
30C	70.224	38.189	15.057	34.609	9.376	11.135	0.525	1.823	5.183	1.3	0	0		30C
30D	43.527	28.394	51.476	101.378	29.358	14.898	0	0	8.028	6.783	0	0		30D
Isa197A	16.003	8.721	142.106	97.294	0.75	3.734	0	0	1.502	0	0	0		Isa197A	33.92	13.1875	90.771	56.5045	7.501	15.2025	0	0	8.501	0.75	0	0.3285
Isa197C	51.837	17.654	39.436	15.715	14.252	26.671	0	0	15.5	1.5	0	0.657		Isa197C
AVG	29.2476	19.4045	57.6831	43.1854	10.7421	12.6908	0.461226	0.344419	5.78071	4.48732	0.597516	0.450677		AVG	28.5765	18.7776	59.7135	45.8666	8.95179	11.4597	0.519324	0.368681	6.67786	5.42897	0.562583	0.518042
SEM	3.31481	2.31128	5.49531	5.1698	1.81838	2.30711	0.140503	0.114502	1.24211	1.08256	0.212554	0.203047		SEM	3.27429	2.42164	5.41672	4.55909	1.68365	1.56933	0.185169	0.148217	1.97582	2.18082	0.232642	0.219151
P	0.00251326		0.00343457		0.343748		0.430173		0.20541		0.589715			P	0.00735333		0.0412165		0.0577136		0.362989		0.350678		0.89532
		AVG	SEM	Mouse1	Mouse2	Mouse3	Mouse4	Mouse5	Mouse6	Mouse7	Mouse8	Mouse9	Mouse10	Mouse11	Mouse12
Attack	Off	28.5765	3.27429	14.0175	32.319	33.563	9.51967	11.7023	38.289	38.1657	29.304	32.4276	24.656	45.0345	33.92
	On	18.7776	2.42164	14.8195	10.0877	32.903	13.1413	14.6997	11.172	32.694	16.672	22.9522	13.901	29.1015	13.1875
Social	Off	59.7135	5.41672	35.768	49.1233	47.615	73.835	74.9103	56.8935	49.749	90.8215	44.5636	61.221	41.2905	90.771
	On	45.8666	4.55909	24.3995	52.678	43.879	17.755	52.0063	63.4155	38.2313	53.7115	27.1488	67.21	53.46	56.5045
Grooming	Off	8.95179	1.68365	6.019	9.93933	2.025	3.47567	9.51033	5.4255	5.76867	15.2825	20.745	4.734	16.9955	7.501
	On	11.4597	1.56933	7.559	8.615	6.215	10.085	6.675	7.053	8.54333	12.98	18.3002	12.267	24.0217	15.2025
Tail Rattles	Off	0.519324	0.185169	0	1.00833	0	0	0.607667	1.4505	0.975333	0	0.2598	1.799	0.13125	0
	On	0.368681	0.148217	0.2625	0	0	0	0.775	0.149	0.768667	0	0	1.551	0.918	0
Lateral Threat	Off	6.67786	1.97582	3.4635	6.223	22.668	1.59967	0.833667	16.215	9.702	1.0875	3.5612	0	6.27975	8.501
	On	5.42897	2.18082	0	3.766	28.334	5.02767	3.56133	7.074	6.34467	2.968	3.8022	0	3.51975	0.75
Chase	Off	0.562583	0.232642	0	1.24167	0	1.301	0	2.5215	1.00033	0	0.105	0	0.5815	0
	On	0.518042	0.219151	0.412	1.862	0	0.517	0.508	0	0	0	0.31	2.279	0	0.3285

## Sheet: Event coding
Assay start	0
Grooming	1
Social	2
Tail Rattles	3
Lateral Threat	4
Chase	5
Attack	6
Light On	8

## Sheet: 9B
Observation id	Observation date	Media file	Total length	FPS	Subject	Behavior	Behavioral category	Modifiers	Behavior type	Start (s)	Stop (s)	Duration (s)	Comment start	Comment stop
RI9B_R9_94_I3H_07_01_2016_15_40_19_174	2019-08-15 20:19:21	E:/Aggression Videos/Bailey1/RI9B_R9_94_I3H_07_01_2016_15_40_19_174_0/RI9B_R9_94_I3H_07_01_2016_15_40_19_174_0.avi	1081.730	30.0	No focal subject	0	-0.141		POINT	299.392	299.392	NA
RI9B_R9_94_I3H_07_01_2016_15_40_19_174	2019-08-15 20:19:21	E:/Aggression Videos/Bailey1/RI9B_R9_94_I3H_07_01_2016_15_40_19_174_0/RI9B_R9_94_I3H_07_01_2016_15_40_19_174_0.avi	1081.730	30.0	No focal subject	2	1.187		STATE	300.720	310.541	9.821
RI9B_R9_94_I3H_07_01_2016_15_40_19_174	2019-08-15 20:19:21	E:/Aggression Videos/Bailey1/RI9B_R9_94_I3H_07_01_2016_15_40_19_174_0/RI9B_R9_94_I3H_07_01_2016_15_40_19_174_0.avi	1081.730	30.0	No focal subject	2	14.418		STATE	313.951	315.425	1.474
RI9B_R9_94_I3H_07_01_2016_15_40_19_174	2019-08-15 20:19:21	E:/Aggression Videos/Bailey1/RI9B_R9_94_I3H_07_01_2016_15_40_19_174_0/RI9B_R9_94_I3H_07_01_2016_15_40_19_174_0.avi	1081.730	30.0	No focal subject	2	17.293		STATE	316.826	321.425	4.599
RI9B_R9_94_I3H_07_01_2016_15_40_19_174	2019-08-15 20:19:21	E:/Aggression Videos/Bailey1/RI9B_R9_94_I3H_07_01_2016_15_40_19_174_0/RI9B_R9_94_I3H_07_01_2016_15_40_19_174_0.avi	1081.730	30.0	No focal subject	2	27.468		STATE	327.001	328.400	1.399
RI9B_R9_94_I3H_07_01_2016_15_40_19_174	2019-08-15 20:19:21	E:/Aggression Videos/Bailey1/RI9B_R9_94_I3H_07_01_2016_15_40_19_174_0/RI9B_R9_94_I3H_07_01_2016_15_40_19_174_0.avi	1081.730	30.0	No focal subject	2	32.642		STATE	332.175	334.501	2.326
RI9B_R9_94_I3H_07_01_2016_15_40_19_174	2019-08-15 20:19:21	E:/Aggression Videos/Bailey1/RI9B_R9_94_I3H_07_01_2016_15_40_19_174_0/RI9B_R9_94_I3H_07_01_2016_15_40_19_174_0.avi	1081.730	30.0	No focal subject	6	35.912		STATE	335.445	337.125	1.680
RI9B_R9_94_I3H_07_01_2016_15_40_19_174	2019-08-15 20:19:21	E:/Aggression Videos/Bailey1/RI9B_R9_94_I3H_07_01_2016_15_40_19_174_0/RI9B_R9_94_I3H_07_01_2016_15_40_19_174_0.avi	1081.730	30.0	No focal subject	6	46.451		STATE	345.984	346.984	1.000
RI9B_R9_94_I3H_07_01_2016_15_40_19_174	2019-08-15 20:19:21	E:/Aggression Videos/Bailey1/RI9B_R9_94_I3H_07_01_2016_15_40_19_174_0/RI9B_R9_94_I3H_07_01_2016_15_40_19_174_0.avi	1081.730	30.0	No focal subject	2	58.612		STATE	358.145	359.470	1.325
RI9B_R9_94_I3H_07_01_2016_15_40_19_174	2019-08-15 20:19:21	E:/Aggression Videos/Bailey1/RI9B_R9_94_I3H_07_01_2016_15_40_19_174_0/RI9B_R9_94_I3H_07_01_2016_15_40_19_174_0.avi	1081.730	30.0	No focal subject	8	60		STATE	359.533	418.800	59.267
RI9B_R9_94_I3H_07_01_2016_15_40_19_174	2019-08-15 20:19:21	E:/Aggression Videos/Bailey1/RI9B_R9_94_I3H_07_01_2016_15_40_19_174_0/RI9B_R9_94_I3H_07_01_2016_15_40_19_174_0.avi	1081.730	30.0	No focal subject	2	66.21		STATE	365.743	368.263	2.520
RI9B_R9_94_I3H_07_01_2016_15_40_19_174	2019-08-15 20:19:21	E:/Aggression Videos/Bailey1/RI9B_R9_94_I3H_07_01_2016_15_40_19_174_0/RI9B_R9_94_I3H_07_01_2016_15_40_19_174_0.avi	1081.730	30.0	No focal subject	2	97.468		STATE	397.001	398.801	1.800
RI9B_R9_94_I3H_07_01_2016_15_40_19_174	2019-08-15 20:19:21	E:/Aggression Videos/Bailey1/RI9B_R9_94_I3H_07_01_2016_15_40_19_174_0/RI9B_R9_94_I3H_07_01_2016_15_40_19_174_0.avi	1081.730	30.0	No focal subject	2	105.596		STATE	405.129	422.002	16.873
RI9B_R9_94_I3H_07_01_2016_15_40_19_174	2019-08-15 20:19:21	E:/Aggression Videos/Bailey1/RI9B_R9_94_I3H_07_01_2016_15_40_19_174_0/RI9B_R9_94_I3H_07_01_2016_15_40_19_174_0.avi	1081.730	30.0	No focal subject	2	124.543		STATE	424.076	424.403	0.327
RI9B_R9_94_I3H_07_01_2016_15_40_19_174	2019-08-15 20:19:21	E:/Aggression Videos/Bailey1/RI9B_R9_94_I3H_07_01_2016_15_40_19_174_0/RI9B_R9_94_I3H_07_01_2016_15_40_19_174_0.avi	1081.730	30.0	No focal subject	2	131.328		STATE	430.861	431.686	0.825
RI9B_R9_94_I3H_07_01_2016_15_40_19_174	2019-08-15 20:19:21	E:/Aggression Videos/Bailey1/RI9B_R9_94_I3H_07_01_2016_15_40_19_174_0/RI9B_R9_94_I3H_07_01_2016_15_40_19_174_0.avi	1081.730	30.0	No focal subject	2	140.874		STATE	440.407	454.361	13.954
RI9B_R9_94_I3H_07_01_2016_15_40_19_174	2019-08-15 20:19:21	E:/Aggression Videos/Bailey1/RI9B_R9_94_I3H_07_01_2016_15_40_19_174_0/RI9B_R9_94_I3H_07_01_2016_15_40_19_174_0.avi	1081.730	30.0	No focal subject	2	164.68		STATE	464.213	467.217	3.004
RI9B_R9_94_I3H_07_01_2016_15_40_19_174	2019-08-15 20:19:21	E:/Aggression Videos/Bailey1/RI9B_R9_94_I3H_07_01_2016_15_40_19_174_0/RI9B_R9_94_I3H_07_01_2016_15_40_19_174_0.avi	1081.730	30.0	No focal subject	8	180.067		STATE	479.600	658.900	179.300
RI9B_R9_94_I3H_07_01_2016_15_40_19_174	2019-08-15 20:19:21	E:/Aggression Videos/Bailey1/RI9B_R9_94_I3H_07_01_2016_15_40_19_174_0/RI9B_R9_94_I3H_07_01_2016_15_40_19_174_0.avi	1081.730	30.0	No focal subject	2	215.51		STATE	515.043	522.083	7.040
RI9B_R9_94_I3H_07_01_2016_15_40_19_174	2019-08-15 20:19:21	E:/Aggression Videos/Bailey1/RI9B_R9_94_I3H_07_01_2016_15_40_19_174_0/RI9B_R9_94_I3H_07_01_2016_15_40_19_174_0.avi	1081.730	30.0	No focal subject	6	222.835		STATE	522.368	532.468	10.100
RI9B_R9_94_I3H_07_01_2016_15_40_19_174	2019-08-15 20:19:21	E:/Aggression Videos/Bailey1/RI9B_R9_94_I3H_07_01_2016_15_40_19_174_0/RI9B_R9_94_I3H_07_01_2016_15_40_19_174_0.avi	1081.730	30.0	No focal subject	1	256.939		STATE	556.472	558.825	2.353
RI9B_R9_94_I3H_07_01_2016_15_40_19_174	2019-08-15 20:19:21	E:/Aggression Videos/Bailey1/RI9B_R9_94_I3H_07_01_2016_15_40_19_174_0/RI9B_R9_94_I3H_07_01_2016_15_40_19_174_0.avi	1081.730	30.0	No focal subject	1	280.121		STATE	579.654	580.680	1.026
RI9B_R9_94_I3H_07_01_2016_15_40_19_174	2019-08-15 20:19:21	E:/Aggression Videos/Bailey1/RI9B_R9_94_I3H_07_01_2016_15_40_19_174_0/RI9B_R9_94_I3H_07_01_2016_15_40_19_174_0.avi	1081.730	30.0	No focal subject	2	297.472		STATE	597.005	599.179	2.174
RI9B_R9_94_I3H_07_01_2016_15_40_19_174	2019-08-15 20:19:21	E:/Aggression Videos/Bailey1/RI9B_R9_94_I3H_07_01_2016_15_40_19_174_0/RI9B_R9_94_I3H_07_01_2016_15_40_19_174_0.avi	1081.730	30.0	No focal subject	2	310.318		STATE	609.851	611.977	2.126
RI9B_R9_94_I3H_07_01_2016_15_40_19_174	2019-08-15 20:19:21	E:/Aggression Videos/Bailey1/RI9B_R9_94_I3H_07_01_2016_15_40_19_174_0/RI9B_R9_94_I3H_07_01_2016_15_40_19_174_0.avi	1081.730	30.0	No focal subject	2	331.32		STATE	630.853	634.294	3.441
RI9B_R9_94_I3H_07_01_2016_15_40_19_174	2019-08-15 20:19:21	E:/Aggression Videos/Bailey1/RI9B_R9_94_I3H_07_01_2016_15_40_19_174_0/RI9B_R9_94_I3H_07_01_2016_15_40_19_174_0.avi	1081.730	30.0	No focal subject	2	363.384		STATE	662.917	666.938	4.021
RI9B_R9_94_I3H_07_01_2016_15_40_19_174	2019-08-15 20:19:21	E:/Aggression Videos/Bailey1/RI9B_R9_94_I3H_07_01_2016_15_40_19_174_0/RI9B_R9_94_I3H_07_01_2016_15_40_19_174_0.avi	1081.730	30.0	No focal subject	6	368.28		STATE	667.813	674.539	6.726
RI9B_R9_94_I3H_07_01_2016_15_40_19_174	2019-08-15 20:19:21	E:/Aggression Videos/Bailey1/RI9B_R9_94_I3H_07_01_2016_15_40_19_174_0/RI9B_R9_94_I3H_07_01_2016_15_40_19_174_0.avi	1081.730	30.0	No focal subject	6	387.65		STATE	687.183	692.388	5.205
RI9B_R9_94_I3H_07_01_2016_15_40_19_174	2019-08-15 20:19:21	E:/Aggression Videos/Bailey1/RI9B_R9_94_I3H_07_01_2016_15_40_19_174_0/RI9B_R9_94_I3H_07_01_2016_15_40_19_174_0.avi	1081.730	30.0	No focal subject	8	420.167		STATE	719.700	778.867	59.167
RI9B_R9_94_I3H_07_01_2016_15_40_19_174	2019-08-15 20:19:21	E:/Aggression Videos/Bailey1/RI9B_R9_94_I3H_07_01_2016_15_40_19_174_0/RI9B_R9_94_I3H_07_01_2016_15_40_19_174_0.avi	1081.730	30.0	No focal subject	1	461.175		STATE	760.708	762.917	2.209
RI9B_R9_94_I3H_07_01_2016_15_40_19_174	2019-08-15 20:19:21	E:/Aggression Videos/Bailey1/RI9B_R9_94_I3H_07_01_2016_15_40_19_174_0/RI9B_R9_94_I3H_07_01_2016_15_40_19_174_0.avi	1081.730	30.0	No focal subject	2	464.75		STATE	764.283	765.208	0.925
RI9B_R9_94_I3H_07_01_2016_15_40_19_174	2019-08-15 20:19:21	E:/Aggression Videos/Bailey1/RI9B_R9_94_I3H_07_01_2016_15_40_19_174_0/RI9B_R9_94_I3H_07_01_2016_15_40_19_174_0.avi	1081.730	30.0	No focal subject	2	478.484		STATE	778.017	782.100	4.083
RI9B_R9_94_I3H_07_01_2016_15_40_19_174	2019-08-15 20:19:21	E:/Aggression Videos/Bailey1/RI9B_R9_94_I3H_07_01_2016_15_40_19_174_0/RI9B_R9_94_I3H_07_01_2016_15_40_19_174_0.avi	1081.730	30.0	No focal subject	1	498.91		STATE	798.443	801.866	3.423
RI9B_R9_94_I3H_07_01_2016_15_40_19_174	2019-08-15 20:19:21	E:/Aggression Videos/Bailey1/RI9B_R9_94_I3H_07_01_2016_15_40_19_174_0/RI9B_R9_94_I3H_07_01_2016_15_40_19_174_0.avi	1081.730	30.0	No focal subject	2	516.036		STATE	815.569	818.999	3.430
RI9B_R9_94_I3H_07_01_2016_15_40_19_174	2019-08-15 20:19:21	E:/Aggression Videos/Bailey1/RI9B_R9_94_I3H_07_01_2016_15_40_19_174_0/RI9B_R9_94_I3H_07_01_2016_15_40_19_174_0.avi	1081.730	30.0	No focal subject	2	537.998		STATE	837.531	838.475	0.944
RI9B_R9_94_I3H_07_01_2016_15_40_19_174	2019-08-15 20:19:21	E:/Aggression Videos/Bailey1/RI9B_R9_94_I3H_07_01_2016_15_40_19_174_0/RI9B_R9_94_I3H_07_01_2016_15_40_19_174_0.avi	1081.730	30.0	No focal subject	8	540.267		STATE	839.800	899.033	59.233
RI9B_R9_94_I3H_07_01_2016_15_40_19_174	2019-08-15 20:19:21	E:/Aggression Videos/Bailey1/RI9B_R9_94_I3H_07_01_2016_15_40_19_174_0/RI9B_R9_94_I3H_07_01_2016_15_40_19_174_0.avi	1081.730	30.0	No focal subject	2	542.851		STATE	842.384	845.426	3.042
RI9B_R9_94_I3H_07_01_2016_15_40_19_174	2019-08-15 20:19:21	E:/Aggression Videos/Bailey1/RI9B_R9_94_I3H_07_01_2016_15_40_19_174_0/RI9B_R9_94_I3H_07_01_2016_15_40_19_174_0.avi	1081.730	30.0	No focal subject	1	549.152		STATE	848.685	850.009	1.324
RI9B_R9_94_I3H_07_01_2016_15_40_19_174	2019-08-15 20:19:21	E:/Aggression Videos/Bailey1/RI9B_R9_94_I3H_07_01_2016_15_40_19_174_0/RI9B_R9_94_I3H_07_01_2016_15_40_19_174_0.avi	1081.730	30.0	No focal subject	2	564.955		STATE	864.488	865.438	0.950
RI9B_R9_94_I3H_07_01_2016_15_40_19_174	2019-08-15 20:19:21	E:/Aggression Videos/Bailey1/RI9B_R9_94_I3H_07_01_2016_15_40_19_174_0/RI9B_R9_94_I3H_07_01_2016_15_40_19_174_0.avi	1081.730	30.0	No focal subject	1	567.847		STATE	867.380	869.589	2.209
RI9B_R9_94_I3H_07_01_2016_15_40_19_174	2019-08-15 20:19:21	E:/Aggression Videos/Bailey1/RI9B_R9_94_I3H_07_01_2016_15_40_19_174_0/RI9B_R9_94_I3H_07_01_2016_15_40_19_174_0.avi	1081.730	30.0	No focal subject	1	575.247		STATE	874.780	877.204	2.424
RI9B_R9_94_I3H_07_01_2016_15_40_19_174	2019-08-15 20:19:21	E:/Aggression Videos/Bailey1/RI9B_R9_94_I3H_07_01_2016_15_40_19_174_0/RI9B_R9_94_I3H_07_01_2016_15_40_19_174_0.avi	1081.730	30.0	No focal subject	1	593.346		STATE	892.879	895.305	2.426
RI9B_R9_94_I3H_07_01_2016_15_40_19_174	2019-08-15 20:19:21	E:/Aggression Videos/Bailey1/RI9B_R9_94_I3H_07_01_2016_15_40_19_174_0/RI9B_R9_94_I3H_07_01_2016_15_40_19_174_0.avi	1081.730	30.0	No focal subject	5	619.993		STATE	919.526	920.526	1.000
RI9B_R9_94_I3H_07_01_2016_15_40_19_174	2019-08-15 20:19:21	E:/Aggression Videos/Bailey1/RI9B_R9_94_I3H_07_01_2016_15_40_19_174_0/RI9B_R9_94_I3H_07_01_2016_15_40_19_174_0.avi	1081.730	30.0	No focal subject	6	621.011		STATE	920.544	933.154	12.610
RI9B_R9_94_I3H_07_01_2016_15_40_19_174	2019-08-15 20:19:21	E:/Aggression Videos/Bailey1/RI9B_R9_94_I3H_07_01_2016_15_40_19_174_0/RI9B_R9_94_I3H_07_01_2016_15_40_19_174_0.avi	1081.730	30.0	No focal subject	1	659.35		STATE	958.883	960.410	1.527
RI9B_R9_94_I3H_07_01_2016_15_40_19_174	2019-08-15 20:19:21	E:/Aggression Videos/Bailey1/RI9B_R9_94_I3H_07_01_2016_15_40_19_174_0/RI9B_R9_94_I3H_07_01_2016_15_40_19_174_0.avi	1081.730	30.0	No focal subject	2	716.544		STATE	1016.077	1016.799	0.722
RI9B_R9_94_I3H_07_01_2016_15_40_19_174	2019-08-15 20:19:21	E:/Aggression Videos/Bailey1/RI9B_R9_94_I3H_07_01_2016_15_40_19_174_0/RI9B_R9_94_I3H_07_01_2016_15_40_19_174_0.avi	1081.730	30.0	No focal subject	1	719.477		STATE	1019.010	1020.434	1.424
RI9B_R9_94_I3H_07_01_2016_15_40_19_174	2019-08-15 20:19:21	E:/Aggression Videos/Bailey1/RI9B_R9_94_I3H_07_01_2016_15_40_19_174_0/RI9B_R9_94_I3H_07_01_2016_15_40_19_174_0.avi	1081.730	30.0	No focal subject	1	729.21		STATE	1028.743	1030.247	1.504
RI9B_R9_94_I3H_07_01_2016_15_40_19_174	2019-08-15 20:19:21	E:/Aggression Videos/Bailey1/RI9B_R9_94_I3H_07_01_2016_15_40_19_174_0/RI9B_R9_94_I3H_07_01_2016_15_40_19_174_0.avi	1081.730	30.0	No focal subject	2	747.56		STATE	1047.093	1048.517	1.424
RI9B_R9_94_I3H_07_01_2016_15_40_19_174	2019-08-15 20:19:21	E:/Aggression Videos/Bailey1/RI9B_R9_94_I3H_07_01_2016_15_40_19_174_0/RI9B_R9_94_I3H_07_01_2016_15_40_19_174_0.avi	1081.730	30.0	No focal subject	1	754.426		STATE	1053.959	1060.484	6.525
RI9B_R9_94_I3H_07_01_2016_15_40_19_174	2019-08-15 20:19:21	E:/Aggression Videos/Bailey1/RI9B_R9_94_I3H_07_01_2016_15_40_19_174_0/RI9B_R9_94_I3H_07_01_2016_15_40_19_174_0.avi	1081.730	30.0	No focal subject	1	773.178		STATE	1072.711	1076.683	3.972

## Sheet: 9D
Observation id	Observation date	Media file	Total length	FPS	Subject	Behavior	Behavioral category	Modifiers	Behavior type	Start (s)	Stop (s)	Duration (s)	Comment start	Comment stop
ChR2_Optical_RI9D_R9_94_I3M_08_04_2016_15_40_19_174	2019-08-15 21:21:13	E:/Aggression Videos/Bailey1/ChR2_Optical_RI9D_R9_94_I3M_08_04_2016_15_40_19_174/ChR2_Optical_RI9D_R9_94_I3M_08_04_2016_15_40_19_174_0.avi	1078.770	30.0	No focal subject	0	0.868		POINT	300.401	300.401	NA
ChR2_Optical_RI9D_R9_94_I3M_08_04_2016_15_40_19_174	2019-08-15 21:21:13	E:/Aggression Videos/Bailey1/ChR2_Optical_RI9D_R9_94_I3M_08_04_2016_15_40_19_174/ChR2_Optical_RI9D_R9_94_I3M_08_04_2016_15_40_19_174_0.avi	1078.770	30.0	No focal subject	2	2.58		STATE	302.113	309.209	7.096
ChR2_Optical_RI9D_R9_94_I3M_08_04_2016_15_40_19_174	2019-08-15 21:21:13	E:/Aggression Videos/Bailey1/ChR2_Optical_RI9D_R9_94_I3M_08_04_2016_15_40_19_174/ChR2_Optical_RI9D_R9_94_I3M_08_04_2016_15_40_19_174_0.avi	1078.770	30.0	No focal subject	2	15.202		STATE	314.735	321.510	6.775
ChR2_Optical_RI9D_R9_94_I3M_08_04_2016_15_40_19_174	2019-08-15 21:21:13	E:/Aggression Videos/Bailey1/ChR2_Optical_RI9D_R9_94_I3M_08_04_2016_15_40_19_174/ChR2_Optical_RI9D_R9_94_I3M_08_04_2016_15_40_19_174_0.avi	1078.770	30.0	No focal subject	2	23.776		STATE	323.309	326.959	3.650
ChR2_Optical_RI9D_R9_94_I3M_08_04_2016_15_40_19_174	2019-08-15 21:21:13	E:/Aggression Videos/Bailey1/ChR2_Optical_RI9D_R9_94_I3M_08_04_2016_15_40_19_174/ChR2_Optical_RI9D_R9_94_I3M_08_04_2016_15_40_19_174_0.avi	1078.770	30.0	No focal subject	1	35.451		STATE	334.984	336.511	1.527
ChR2_Optical_RI9D_R9_94_I3M_08_04_2016_15_40_19_174	2019-08-15 21:21:13	E:/Aggression Videos/Bailey1/ChR2_Optical_RI9D_R9_94_I3M_08_04_2016_15_40_19_174/ChR2_Optical_RI9D_R9_94_I3M_08_04_2016_15_40_19_174_0.avi	1078.770	30.0	No focal subject	8	60		STATE	359.533	419.100	59.567
ChR2_Optical_RI9D_R9_94_I3M_08_04_2016_15_40_19_174	2019-08-15 21:21:13	E:/Aggression Videos/Bailey1/ChR2_Optical_RI9D_R9_94_I3M_08_04_2016_15_40_19_174/ChR2_Optical_RI9D_R9_94_I3M_08_04_2016_15_40_19_174_0.avi	1078.770	30.0	No focal subject	2	72.327		STATE	371.860	372.501	0.641
ChR2_Optical_RI9D_R9_94_I3M_08_04_2016_15_40_19_174	2019-08-15 21:21:13	E:/Aggression Videos/Bailey1/ChR2_Optical_RI9D_R9_94_I3M_08_04_2016_15_40_19_174/ChR2_Optical_RI9D_R9_94_I3M_08_04_2016_15_40_19_174_0.avi	1078.770	30.0	No focal subject	2	128.218		STATE	427.751	428.551	0.800
ChR2_Optical_RI9D_R9_94_I3M_08_04_2016_15_40_19_174	2019-08-15 21:21:13	E:/Aggression Videos/Bailey1/ChR2_Optical_RI9D_R9_94_I3M_08_04_2016_15_40_19_174/ChR2_Optical_RI9D_R9_94_I3M_08_04_2016_15_40_19_174_0.avi	1078.770	30.0	No focal subject	2	145.869		STATE	445.402	446.151	0.749
ChR2_Optical_RI9D_R9_94_I3M_08_04_2016_15_40_19_174	2019-08-15 21:21:13	E:/Aggression Videos/Bailey1/ChR2_Optical_RI9D_R9_94_I3M_08_04_2016_15_40_19_174/ChR2_Optical_RI9D_R9_94_I3M_08_04_2016_15_40_19_174_0.avi	1078.770	30.0	No focal subject	8	180.167		STATE	479.700	538.967	59.267
ChR2_Optical_RI9D_R9_94_I3M_08_04_2016_15_40_19_174	2019-08-15 21:21:13	E:/Aggression Videos/Bailey1/ChR2_Optical_RI9D_R9_94_I3M_08_04_2016_15_40_19_174/ChR2_Optical_RI9D_R9_94_I3M_08_04_2016_15_40_19_174_0.avi	1078.770	30.0	No focal subject	2	195.234		STATE	494.767	495.693	0.926
ChR2_Optical_RI9D_R9_94_I3M_08_04_2016_15_40_19_174	2019-08-15 21:21:13	E:/Aggression Videos/Bailey1/ChR2_Optical_RI9D_R9_94_I3M_08_04_2016_15_40_19_174/ChR2_Optical_RI9D_R9_94_I3M_08_04_2016_15_40_19_174_0.avi	1078.770	30.0	No focal subject	3	209.434		STATE	508.967	509.492	0.525
ChR2_Optical_RI9D_R9_94_I3M_08_04_2016_15_40_19_174	2019-08-15 21:21:13	E:/Aggression Videos/Bailey1/ChR2_Optical_RI9D_R9_94_I3M_08_04_2016_15_40_19_174/ChR2_Optical_RI9D_R9_94_I3M_08_04_2016_15_40_19_174_0.avi	1078.770	30.0	No focal subject	6	210.734		STATE	510.267	517.808	7.541
ChR2_Optical_RI9D_R9_94_I3M_08_04_2016_15_40_19_174	2019-08-15 21:21:13	E:/Aggression Videos/Bailey1/ChR2_Optical_RI9D_R9_94_I3M_08_04_2016_15_40_19_174/ChR2_Optical_RI9D_R9_94_I3M_08_04_2016_15_40_19_174_0.avi	1078.770	30.0	No focal subject	2	239.392		STATE	538.925	539.207	0.282
ChR2_Optical_RI9D_R9_94_I3M_08_04_2016_15_40_19_174	2019-08-15 21:21:13	E:/Aggression Videos/Bailey1/ChR2_Optical_RI9D_R9_94_I3M_08_04_2016_15_40_19_174/ChR2_Optical_RI9D_R9_94_I3M_08_04_2016_15_40_19_174_0.avi	1078.770	30.0	No focal subject	1	288.008		STATE	587.541	589.366	1.825
ChR2_Optical_RI9D_R9_94_I3M_08_04_2016_15_40_19_174	2019-08-15 21:21:13	E:/Aggression Videos/Bailey1/ChR2_Optical_RI9D_R9_94_I3M_08_04_2016_15_40_19_174/ChR2_Optical_RI9D_R9_94_I3M_08_04_2016_15_40_19_174_0.avi	1078.770	30.0	No focal subject	8	300.134		STATE	599.667	658.933	59.266
ChR2_Optical_RI9D_R9_94_I3M_08_04_2016_15_40_19_174	2019-08-15 21:21:13	E:/Aggression Videos/Bailey1/ChR2_Optical_RI9D_R9_94_I3M_08_04_2016_15_40_19_174/ChR2_Optical_RI9D_R9_94_I3M_08_04_2016_15_40_19_174_0.avi	1078.770	30.0	No focal subject	2	318.234		STATE	617.767	619.316	1.549	Invesitaged intruder's tail
ChR2_Optical_RI9D_R9_94_I3M_08_04_2016_15_40_19_174	2019-08-15 21:21:13	E:/Aggression Videos/Bailey1/ChR2_Optical_RI9D_R9_94_I3M_08_04_2016_15_40_19_174/ChR2_Optical_RI9D_R9_94_I3M_08_04_2016_15_40_19_174_0.avi	1078.770	30.0	No focal subject	6	326.642		STATE	626.175	629.824	3.649
ChR2_Optical_RI9D_R9_94_I3M_08_04_2016_15_40_19_174	2019-08-15 21:21:13	E:/Aggression Videos/Bailey1/ChR2_Optical_RI9D_R9_94_I3M_08_04_2016_15_40_19_174/ChR2_Optical_RI9D_R9_94_I3M_08_04_2016_15_40_19_174_0.avi	1078.770	30.0	No focal subject	7	342.766		STATE	642.299	643.274	0.975
ChR2_Optical_RI9D_R9_94_I3M_08_04_2016_15_40_19_174	2019-08-15 21:21:13	E:/Aggression Videos/Bailey1/ChR2_Optical_RI9D_R9_94_I3M_08_04_2016_15_40_19_174/ChR2_Optical_RI9D_R9_94_I3M_08_04_2016_15_40_19_174_0.avi	1078.770	30.0	No focal subject	2	350.5		STATE	650.033	650.558	0.525
ChR2_Optical_RI9D_R9_94_I3M_08_04_2016_15_40_19_174	2019-08-15 21:21:13	E:/Aggression Videos/Bailey1/ChR2_Optical_RI9D_R9_94_I3M_08_04_2016_15_40_19_174/ChR2_Optical_RI9D_R9_94_I3M_08_04_2016_15_40_19_174_0.avi	1078.770	30.0	No focal subject	7	356.824		STATE	656.357	657.382	1.025
ChR2_Optical_RI9D_R9_94_I3M_08_04_2016_15_40_19_174	2019-08-15 21:21:13	E:/Aggression Videos/Bailey1/ChR2_Optical_RI9D_R9_94_I3M_08_04_2016_15_40_19_174/ChR2_Optical_RI9D_R9_94_I3M_08_04_2016_15_40_19_174_0.avi	1078.770	30.0	No focal subject	6	367.05		STATE	666.583	671.682	5.099
ChR2_Optical_RI9D_R9_94_I3M_08_04_2016_15_40_19_174	2019-08-15 21:21:13	E:/Aggression Videos/Bailey1/ChR2_Optical_RI9D_R9_94_I3M_08_04_2016_15_40_19_174/ChR2_Optical_RI9D_R9_94_I3M_08_04_2016_15_40_19_174_0.avi	1078.770	30.0	No focal subject	4	382.65		STATE	682.183	682.958	0.775
ChR2_Optical_RI9D_R9_94_I3M_08_04_2016_15_40_19_174	2019-08-15 21:21:13	E:/Aggression Videos/Bailey1/ChR2_Optical_RI9D_R9_94_I3M_08_04_2016_15_40_19_174/ChR2_Optical_RI9D_R9_94_I3M_08_04_2016_15_40_19_174_0.avi	1078.770	30.0	No focal subject	4	388.124		STATE	687.657	690.183	2.526
ChR2_Optical_RI9D_R9_94_I3M_08_04_2016_15_40_19_174	2019-08-15 21:21:13	E:/Aggression Videos/Bailey1/ChR2_Optical_RI9D_R9_94_I3M_08_04_2016_15_40_19_174/ChR2_Optical_RI9D_R9_94_I3M_08_04_2016_15_40_19_174_0.avi	1078.770	30.0	No focal subject	4	409.374		STATE	708.907	709.408	0.501
ChR2_Optical_RI9D_R9_94_I3M_08_04_2016_15_40_19_174	2019-08-15 21:21:13	E:/Aggression Videos/Bailey1/ChR2_Optical_RI9D_R9_94_I3M_08_04_2016_15_40_19_174/ChR2_Optical_RI9D_R9_94_I3M_08_04_2016_15_40_19_174_0.avi	1078.770	30.0	No focal subject	8	420.334		STATE	719.867	779.100	59.233
ChR2_Optical_RI9D_R9_94_I3M_08_04_2016_15_40_19_174	2019-08-15 21:21:13	E:/Aggression Videos/Bailey1/ChR2_Optical_RI9D_R9_94_I3M_08_04_2016_15_40_19_174/ChR2_Optical_RI9D_R9_94_I3M_08_04_2016_15_40_19_174_0.avi	1078.770	30.0	No focal subject	2	427.732		STATE	727.265	727.766	0.501
ChR2_Optical_RI9D_R9_94_I3M_08_04_2016_15_40_19_174	2019-08-15 21:21:13	E:/Aggression Videos/Bailey1/ChR2_Optical_RI9D_R9_94_I3M_08_04_2016_15_40_19_174/ChR2_Optical_RI9D_R9_94_I3M_08_04_2016_15_40_19_174_0.avi	1078.770	30.0	No focal subject	2	430.649		STATE	730.182	730.433	0.251
ChR2_Optical_RI9D_R9_94_I3M_08_04_2016_15_40_19_174	2019-08-15 21:21:13	E:/Aggression Videos/Bailey1/ChR2_Optical_RI9D_R9_94_I3M_08_04_2016_15_40_19_174/ChR2_Optical_RI9D_R9_94_I3M_08_04_2016_15_40_19_174_0.avi	1078.770	30.0	No focal subject	2	445.249		STATE	744.782	745.307	0.525
ChR2_Optical_RI9D_R9_94_I3M_08_04_2016_15_40_19_174	2019-08-15 21:21:13	E:/Aggression Videos/Bailey1/ChR2_Optical_RI9D_R9_94_I3M_08_04_2016_15_40_19_174/ChR2_Optical_RI9D_R9_94_I3M_08_04_2016_15_40_19_174_0.avi	1078.770	30.0	No focal subject	2	465.724		STATE	765.257	766.056	0.799
ChR2_Optical_RI9D_R9_94_I3M_08_04_2016_15_40_19_174	2019-08-15 21:21:13	E:/Aggression Videos/Bailey1/ChR2_Optical_RI9D_R9_94_I3M_08_04_2016_15_40_19_174/ChR2_Optical_RI9D_R9_94_I3M_08_04_2016_15_40_19_174_0.avi	1078.770	30.0	No focal subject	7	484.932		STATE	784.465	784.999	0.534
ChR2_Optical_RI9D_R9_94_I3M_08_04_2016_15_40_19_174	2019-08-15 21:21:13	E:/Aggression Videos/Bailey1/ChR2_Optical_RI9D_R9_94_I3M_08_04_2016_15_40_19_174/ChR2_Optical_RI9D_R9_94_I3M_08_04_2016_15_40_19_174_0.avi	1078.770	30.0	No focal subject	4	485.466		STATE	784.999	788.124	3.125
ChR2_Optical_RI9D_R9_94_I3M_08_04_2016_15_40_19_174	2019-08-15 21:21:13	E:/Aggression Videos/Bailey1/ChR2_Optical_RI9D_R9_94_I3M_08_04_2016_15_40_19_174/ChR2_Optical_RI9D_R9_94_I3M_08_04_2016_15_40_19_174_0.avi	1078.770	30.0	No focal subject	6	497.506		STATE	797.039	800.690	3.651
ChR2_Optical_RI9D_R9_94_I3M_08_04_2016_15_40_19_174	2019-08-15 21:21:13	E:/Aggression Videos/Bailey1/ChR2_Optical_RI9D_R9_94_I3M_08_04_2016_15_40_19_174/ChR2_Optical_RI9D_R9_94_I3M_08_04_2016_15_40_19_174_0.avi	1078.770	30.0	No focal subject	7	503.806		STATE	803.339	804.614	1.275
ChR2_Optical_RI9D_R9_94_I3M_08_04_2016_15_40_19_174	2019-08-15 21:21:13	E:/Aggression Videos/Bailey1/ChR2_Optical_RI9D_R9_94_I3M_08_04_2016_15_40_19_174/ChR2_Optical_RI9D_R9_94_I3M_08_04_2016_15_40_19_174_0.avi	1078.770	30.0	No focal subject	1	505.357		STATE	804.890	806.490	1.600
ChR2_Optical_RI9D_R9_94_I3M_08_04_2016_15_40_19_174	2019-08-15 21:21:13	E:/Aggression Videos/Bailey1/ChR2_Optical_RI9D_R9_94_I3M_08_04_2016_15_40_19_174/ChR2_Optical_RI9D_R9_94_I3M_08_04_2016_15_40_19_174_0.avi	1078.770	30.0	No focal subject	1	513.694		STATE	813.227	813.511	0.284
ChR2_Optical_RI9D_R9_94_I3M_08_04_2016_15_40_19_174	2019-08-15 21:21:13	E:/Aggression Videos/Bailey1/ChR2_Optical_RI9D_R9_94_I3M_08_04_2016_15_40_19_174/ChR2_Optical_RI9D_R9_94_I3M_08_04_2016_15_40_19_174_0.avi	1078.770	30.0	No focal subject	2	516.25		STATE	815.783	817.851	2.068
ChR2_Optical_RI9D_R9_94_I3M_08_04_2016_15_40_19_174	2019-08-15 21:21:13	E:/Aggression Videos/Bailey1/ChR2_Optical_RI9D_R9_94_I3M_08_04_2016_15_40_19_174/ChR2_Optical_RI9D_R9_94_I3M_08_04_2016_15_40_19_174_0.avi	1078.770	30.0	No focal subject	2	524.811		STATE	824.344	825.119	0.775
ChR2_Optical_RI9D_R9_94_I3M_08_04_2016_15_40_19_174	2019-08-15 21:21:13	E:/Aggression Videos/Bailey1/ChR2_Optical_RI9D_R9_94_I3M_08_04_2016_15_40_19_174/ChR2_Optical_RI9D_R9_94_I3M_08_04_2016_15_40_19_174_0.avi	1078.770	30.0	No focal subject	6	530.811		STATE	830.344	835.018	4.674
ChR2_Optical_RI9D_R9_94_I3M_08_04_2016_15_40_19_174	2019-08-15 21:21:13	E:/Aggression Videos/Bailey1/ChR2_Optical_RI9D_R9_94_I3M_08_04_2016_15_40_19_174/ChR2_Optical_RI9D_R9_94_I3M_08_04_2016_15_40_19_174_0.avi	1078.770	30.0	No focal subject	7	539.411		STATE	838.944	839.469	0.525	Lunge!
ChR2_Optical_RI9D_R9_94_I3M_08_04_2016_15_40_19_174	2019-08-15 21:21:13	E:/Aggression Videos/Bailey1/ChR2_Optical_RI9D_R9_94_I3M_08_04_2016_15_40_19_174/ChR2_Optical_RI9D_R9_94_I3M_08_04_2016_15_40_19_174_0.avi	1078.770	30.0	No focal subject	8	540.334		STATE	839.867	899.100	59.233
ChR2_Optical_RI9D_R9_94_I3M_08_04_2016_15_40_19_174	2019-08-15 21:21:13	E:/Aggression Videos/Bailey1/ChR2_Optical_RI9D_R9_94_I3M_08_04_2016_15_40_19_174/ChR2_Optical_RI9D_R9_94_I3M_08_04_2016_15_40_19_174_0.avi	1078.770	30.0	No focal subject	1	546.743		STATE	846.276	848.027	1.751
ChR2_Optical_RI9D_R9_94_I3M_08_04_2016_15_40_19_174	2019-08-15 21:21:13	E:/Aggression Videos/Bailey1/ChR2_Optical_RI9D_R9_94_I3M_08_04_2016_15_40_19_174/ChR2_Optical_RI9D_R9_94_I3M_08_04_2016_15_40_19_174_0.avi	1078.770	30.0	No focal subject	5	549.669		STATE	849.202	850.026	0.824
ChR2_Optical_RI9D_R9_94_I3M_08_04_2016_15_40_19_174	2019-08-15 21:21:13	E:/Aggression Videos/Bailey1/ChR2_Optical_RI9D_R9_94_I3M_08_04_2016_15_40_19_174/ChR2_Optical_RI9D_R9_94_I3M_08_04_2016_15_40_19_174_0.avi	1078.770	30.0	No focal subject	1	565.786		STATE	865.319	866.593	1.274
ChR2_Optical_RI9D_R9_94_I3M_08_04_2016_15_40_19_174	2019-08-15 21:21:13	E:/Aggression Videos/Bailey1/ChR2_Optical_RI9D_R9_94_I3M_08_04_2016_15_40_19_174/ChR2_Optical_RI9D_R9_94_I3M_08_04_2016_15_40_19_174_0.avi	1078.770	30.0	No focal subject	1	572.643		STATE	872.176	873.677	1.501
ChR2_Optical_RI9D_R9_94_I3M_08_04_2016_15_40_19_174	2019-08-15 21:21:13	E:/Aggression Videos/Bailey1/ChR2_Optical_RI9D_R9_94_I3M_08_04_2016_15_40_19_174/ChR2_Optical_RI9D_R9_94_I3M_08_04_2016_15_40_19_174_0.avi	1078.770	30.0	No focal subject	6	581.944		STATE	881.477	889.826	8.349
ChR2_Optical_RI9D_R9_94_I3M_08_04_2016_15_40_19_174	2019-08-15 21:21:13	E:/Aggression Videos/Bailey1/ChR2_Optical_RI9D_R9_94_I3M_08_04_2016_15_40_19_174/ChR2_Optical_RI9D_R9_94_I3M_08_04_2016_15_40_19_174_0.avi	1078.770	30.0	No focal subject	7	602.777		STATE	902.310	902.584	0.274
ChR2_Optical_RI9D_R9_94_I3M_08_04_2016_15_40_19_174	2019-08-15 21:21:13	E:/Aggression Videos/Bailey1/ChR2_Optical_RI9D_R9_94_I3M_08_04_2016_15_40_19_174/ChR2_Optical_RI9D_R9_94_I3M_08_04_2016_15_40_19_174_0.avi	1078.770	30.0	No focal subject	2	614.719		STATE	914.252	914.753	0.501
ChR2_Optical_RI9D_R9_94_I3M_08_04_2016_15_40_19_174	2019-08-15 21:21:13	E:/Aggression Videos/Bailey1/ChR2_Optical_RI9D_R9_94_I3M_08_04_2016_15_40_19_174/ChR2_Optical_RI9D_R9_94_I3M_08_04_2016_15_40_19_174_0.avi	1078.770	30.0	No focal subject	2	668.087		STATE	967.620	968.645	1.025
ChR2_Optical_RI9D_R9_94_I3M_08_04_2016_15_40_19_174	2019-08-15 21:21:13	E:/Aggression Videos/Bailey1/ChR2_Optical_RI9D_R9_94_I3M_08_04_2016_15_40_19_174/ChR2_Optical_RI9D_R9_94_I3M_08_04_2016_15_40_19_174_0.avi	1078.770	30.0	No focal subject	1	675.628		STATE	975.161	977.211	2.050
ChR2_Optical_RI9D_R9_94_I3M_08_04_2016_15_40_19_174	2019-08-15 21:21:13	E:/Aggression Videos/Bailey1/ChR2_Optical_RI9D_R9_94_I3M_08_04_2016_15_40_19_174/ChR2_Optical_RI9D_R9_94_I3M_08_04_2016_15_40_19_174_0.avi	1078.770	30.0	No focal subject	2	678.702		STATE	978.235	978.251	0.016
ChR2_Optical_RI9D_R9_94_I3M_08_04_2016_15_40_19_174	2019-08-15 21:21:13	E:/Aggression Videos/Bailey1/ChR2_Optical_RI9D_R9_94_I3M_08_04_2016_15_40_19_174/ChR2_Optical_RI9D_R9_94_I3M_08_04_2016_15_40_19_174_0.avi	1078.770	30.0	No focal subject	7	683.878		STATE	983.411	984.461	1.050
ChR2_Optical_RI9D_R9_94_I3M_08_04_2016_15_40_19_174	2019-08-15 21:21:13	E:/Aggression Videos/Bailey1/ChR2_Optical_RI9D_R9_94_I3M_08_04_2016_15_40_19_174/ChR2_Optical_RI9D_R9_94_I3M_08_04_2016_15_40_19_174_0.avi	1078.770	30.0	No focal subject	7	691.477		STATE	991.010	991.436	0.426
ChR2_Optical_RI9D_R9_94_I3M_08_04_2016_15_40_19_174	2019-08-15 21:21:13	E:/Aggression Videos/Bailey1/ChR2_Optical_RI9D_R9_94_I3M_08_04_2016_15_40_19_174/ChR2_Optical_RI9D_R9_94_I3M_08_04_2016_15_40_19_174_0.avi	1078.770	30.0	No focal subject	4	691.903		STATE	991.436	992.219	0.783
ChR2_Optical_RI9D_R9_94_I3M_08_04_2016_15_40_19_174	2019-08-15 21:21:13	E:/Aggression Videos/Bailey1/ChR2_Optical_RI9D_R9_94_I3M_08_04_2016_15_40_19_174/ChR2_Optical_RI9D_R9_94_I3M_08_04_2016_15_40_19_174_0.avi	1078.770	30.0	No focal subject	6	698.887		STATE	998.420	1002.345	3.925
ChR2_Optical_RI9D_R9_94_I3M_08_04_2016_15_40_19_174	2019-08-15 21:21:13	E:/Aggression Videos/Bailey1/ChR2_Optical_RI9D_R9_94_I3M_08_04_2016_15_40_19_174/ChR2_Optical_RI9D_R9_94_I3M_08_04_2016_15_40_19_174_0.avi	1078.770	30.0	No focal subject	1	723.995		STATE	1023.528	1034.702	11.174
ChR2_Optical_RI9D_R9_94_I3M_08_04_2016_15_40_19_174	2019-08-15 21:21:13	E:/Aggression Videos/Bailey1/ChR2_Optical_RI9D_R9_94_I3M_08_04_2016_15_40_19_174/ChR2_Optical_RI9D_R9_94_I3M_08_04_2016_15_40_19_174_0.avi	1078.770	30.0	No focal subject	2	759.295		STATE	1058.828	1059.103	0.275
ChR2_Optical_RI9D_R9_94_I3M_08_04_2016_15_40_19_174	2019-08-15 21:21:13	E:/Aggression Videos/Bailey1/ChR2_Optical_RI9D_R9_94_I3M_08_04_2016_15_40_19_174/ChR2_Optical_RI9D_R9_94_I3M_08_04_2016_15_40_19_174_0.avi	1078.770	30.0	No focal subject	6	773.071		STATE	1072.604	1075.175	2.571
ChR2_Optical_RI9D_R9_94_I3M_08_04_2016_15_40_19_174	2019-08-15 21:21:13	E:/Aggression Videos/Bailey1/ChR2_Optical_RI9D_R9_94_I3M_08_04_2016_15_40_19_174/ChR2_Optical_RI9D_R9_94_I3M_08_04_2016_15_40_19_174_0.avi	1078.770	30.0	No focal subject	4	775.642		STATE	1075.175	1076.774	1.599

## Sheet: 13A
Observation id	Observation date	Media file	Total length	FPS	Subject	Behavior	Behavioral category	Modifiers	Behavior type	Start (s)	Stop (s)	Duration (s)	Comment start	Comment stop
ChR2_Optical_RI13A_R9_99_I2E_06_02_2016_15_40_19_174	2019-08-17 19:55:36	E:/Aggression Videos/Bailey1/ChR2_Optical_RI13A_R9_99_I2E_06_02_2016_15_40_19_174/ChR2_Optical_RI13A_R9_99_I2E_06_02_2016_15_40_19_174_0.avi	1080.670	30.0	No focal subject	0	1.009		POINT	301.309	301.309	NA
ChR2_Optical_RI13A_R9_99_I2E_06_02_2016_15_40_19_174	2019-08-17 19:55:36	E:/Aggression Videos/Bailey1/ChR2_Optical_RI13A_R9_99_I2E_06_02_2016_15_40_19_174/ChR2_Optical_RI13A_R9_99_I2E_06_02_2016_15_40_19_174_0.avi	1080.670	30.0	No focal subject	2	3.559		STATE	303.859	317.334	13.475
ChR2_Optical_RI13A_R9_99_I2E_06_02_2016_15_40_19_174	2019-08-17 19:55:36	E:/Aggression Videos/Bailey1/ChR2_Optical_RI13A_R9_99_I2E_06_02_2016_15_40_19_174/ChR2_Optical_RI13A_R9_99_I2E_06_02_2016_15_40_19_174_0.avi	1080.670	30.0	No focal subject	2	19.335		STATE	319.635	336.501	16.866
ChR2_Optical_RI13A_R9_99_I2E_06_02_2016_15_40_19_174	2019-08-17 19:55:36	E:/Aggression Videos/Bailey1/ChR2_Optical_RI13A_R9_99_I2E_06_02_2016_15_40_19_174/ChR2_Optical_RI13A_R9_99_I2E_06_02_2016_15_40_19_174_0.avi	1080.670	30.0	No focal subject	6	36.675		STATE	336.975	349.189	12.214
ChR2_Optical_RI13A_R9_99_I2E_06_02_2016_15_40_19_174	2019-08-17 19:55:36	E:/Aggression Videos/Bailey1/ChR2_Optical_RI13A_R9_99_I2E_06_02_2016_15_40_19_174/ChR2_Optical_RI13A_R9_99_I2E_06_02_2016_15_40_19_174_0.avi	1080.670	30.0	No focal subject	7	48.889		STATE	349.189	349.776	0.587
ChR2_Optical_RI13A_R9_99_I2E_06_02_2016_15_40_19_174	2019-08-17 19:55:36	E:/Aggression Videos/Bailey1/ChR2_Optical_RI13A_R9_99_I2E_06_02_2016_15_40_19_174/ChR2_Optical_RI13A_R9_99_I2E_06_02_2016_15_40_19_174_0.avi	1080.670	30.0	No focal subject	4	49.476		STATE	349.776	351.026	1.250
ChR2_Optical_RI13A_R9_99_I2E_06_02_2016_15_40_19_174	2019-08-17 19:55:36	E:/Aggression Videos/Bailey1/ChR2_Optical_RI13A_R9_99_I2E_06_02_2016_15_40_19_174/ChR2_Optical_RI13A_R9_99_I2E_06_02_2016_15_40_19_174_0.avi	1080.670	30.0	No focal subject	6	50.726		STATE	351.026	353.701	2.675
ChR2_Optical_RI13A_R9_99_I2E_06_02_2016_15_40_19_174	2019-08-17 19:55:36	E:/Aggression Videos/Bailey1/ChR2_Optical_RI13A_R9_99_I2E_06_02_2016_15_40_19_174/ChR2_Optical_RI13A_R9_99_I2E_06_02_2016_15_40_19_174_0.avi	1080.670	30.0	No focal subject	2	56.984		STATE	357.284	357.808	0.524
ChR2_Optical_RI13A_R9_99_I2E_06_02_2016_15_40_19_174	2019-08-17 19:55:36	E:/Aggression Videos/Bailey1/ChR2_Optical_RI13A_R9_99_I2E_06_02_2016_15_40_19_174/ChR2_Optical_RI13A_R9_99_I2E_06_02_2016_15_40_19_174_0.avi	1080.670	30.0	No focal subject	8	60		STATE	360.300	420.367	60.067
ChR2_Optical_RI13A_R9_99_I2E_06_02_2016_15_40_19_174	2019-08-17 19:55:36	E:/Aggression Videos/Bailey1/ChR2_Optical_RI13A_R9_99_I2E_06_02_2016_15_40_19_174/ChR2_Optical_RI13A_R9_99_I2E_06_02_2016_15_40_19_174_0.avi	1080.670	30.0	No focal subject	2	75.125		STATE	375.425	376.400	0.975
ChR2_Optical_RI13A_R9_99_I2E_06_02_2016_15_40_19_174	2019-08-17 19:55:36	E:/Aggression Videos/Bailey1/ChR2_Optical_RI13A_R9_99_I2E_06_02_2016_15_40_19_174/ChR2_Optical_RI13A_R9_99_I2E_06_02_2016_15_40_19_174_0.avi	1080.670	30.0	No focal subject	1	83.767		STATE	384.067	384.767	0.700
ChR2_Optical_RI13A_R9_99_I2E_06_02_2016_15_40_19_174	2019-08-17 19:55:36	E:/Aggression Videos/Bailey1/ChR2_Optical_RI13A_R9_99_I2E_06_02_2016_15_40_19_174/ChR2_Optical_RI13A_R9_99_I2E_06_02_2016_15_40_19_174_0.avi	1080.670	30.0	No focal subject	1	91.858		STATE	392.158	393.333	1.175
ChR2_Optical_RI13A_R9_99_I2E_06_02_2016_15_40_19_174	2019-08-17 19:55:36	E:/Aggression Videos/Bailey1/ChR2_Optical_RI13A_R9_99_I2E_06_02_2016_15_40_19_174/ChR2_Optical_RI13A_R9_99_I2E_06_02_2016_15_40_19_174_0.avi	1080.670	30.0	No focal subject	2	96.606		STATE	396.906	398.459	1.553
ChR2_Optical_RI13A_R9_99_I2E_06_02_2016_15_40_19_174	2019-08-17 19:55:36	E:/Aggression Videos/Bailey1/ChR2_Optical_RI13A_R9_99_I2E_06_02_2016_15_40_19_174/ChR2_Optical_RI13A_R9_99_I2E_06_02_2016_15_40_19_174_0.avi	1080.670	30.0	No focal subject	2	110.066		STATE	410.366	410.891	0.525
ChR2_Optical_RI13A_R9_99_I2E_06_02_2016_15_40_19_174	2019-08-17 19:55:36	E:/Aggression Videos/Bailey1/ChR2_Optical_RI13A_R9_99_I2E_06_02_2016_15_40_19_174/ChR2_Optical_RI13A_R9_99_I2E_06_02_2016_15_40_19_174_0.avi	1080.670	30.0	No focal subject	5	112.666		STATE	412.966	415.309	2.343
ChR2_Optical_RI13A_R9_99_I2E_06_02_2016_15_40_19_174	2019-08-17 19:55:36	E:/Aggression Videos/Bailey1/ChR2_Optical_RI13A_R9_99_I2E_06_02_2016_15_40_19_174/ChR2_Optical_RI13A_R9_99_I2E_06_02_2016_15_40_19_174_0.avi	1080.670	30.0	No focal subject	6	115.009		STATE	415.309	416.216	0.907
ChR2_Optical_RI13A_R9_99_I2E_06_02_2016_15_40_19_174	2019-08-17 19:55:36	E:/Aggression Videos/Bailey1/ChR2_Optical_RI13A_R9_99_I2E_06_02_2016_15_40_19_174/ChR2_Optical_RI13A_R9_99_I2E_06_02_2016_15_40_19_174_0.avi	1080.670	30.0	No focal subject	5	115.916		STATE	416.216	419.459	3.243
ChR2_Optical_RI13A_R9_99_I2E_06_02_2016_15_40_19_174	2019-08-17 19:55:36	E:/Aggression Videos/Bailey1/ChR2_Optical_RI13A_R9_99_I2E_06_02_2016_15_40_19_174/ChR2_Optical_RI13A_R9_99_I2E_06_02_2016_15_40_19_174_0.avi	1080.670	30.0	No focal subject	5	120.209		STATE	420.509	423.010	2.501
ChR2_Optical_RI13A_R9_99_I2E_06_02_2016_15_40_19_174	2019-08-17 19:55:36	E:/Aggression Videos/Bailey1/ChR2_Optical_RI13A_R9_99_I2E_06_02_2016_15_40_19_174/ChR2_Optical_RI13A_R9_99_I2E_06_02_2016_15_40_19_174_0.avi	1080.670	30.0	No focal subject	4	123.5		STATE	423.800	433.475	9.675
ChR2_Optical_RI13A_R9_99_I2E_06_02_2016_15_40_19_174	2019-08-17 19:55:36	E:/Aggression Videos/Bailey1/ChR2_Optical_RI13A_R9_99_I2E_06_02_2016_15_40_19_174/ChR2_Optical_RI13A_R9_99_I2E_06_02_2016_15_40_19_174_0.avi	1080.670	30.0	No focal subject	6	161.059		STATE	461.359	469.400	8.041
ChR2_Optical_RI13A_R9_99_I2E_06_02_2016_15_40_19_174	2019-08-17 19:55:36	E:/Aggression Videos/Bailey1/ChR2_Optical_RI13A_R9_99_I2E_06_02_2016_15_40_19_174/ChR2_Optical_RI13A_R9_99_I2E_06_02_2016_15_40_19_174_0.avi	1080.670	30.0	No focal subject	1	179.402		STATE	479.702	482.009	2.307
ChR2_Optical_RI13A_R9_99_I2E_06_02_2016_15_40_19_174	2019-08-17 19:55:36	E:/Aggression Videos/Bailey1/ChR2_Optical_RI13A_R9_99_I2E_06_02_2016_15_40_19_174/ChR2_Optical_RI13A_R9_99_I2E_06_02_2016_15_40_19_174_0.avi	1080.670	30.0	No focal subject	8	180.133		STATE	480.433	540.500	60.067
ChR2_Optical_RI13A_R9_99_I2E_06_02_2016_15_40_19_174	2019-08-17 19:55:36	E:/Aggression Videos/Bailey1/ChR2_Optical_RI13A_R9_99_I2E_06_02_2016_15_40_19_174/ChR2_Optical_RI13A_R9_99_I2E_06_02_2016_15_40_19_174_0.avi	1080.670	30.0	No focal subject	1	186.993		STATE	487.293	489.093	1.800
ChR2_Optical_RI13A_R9_99_I2E_06_02_2016_15_40_19_174	2019-08-17 19:55:36	E:/Aggression Videos/Bailey1/ChR2_Optical_RI13A_R9_99_I2E_06_02_2016_15_40_19_174/ChR2_Optical_RI13A_R9_99_I2E_06_02_2016_15_40_19_174_0.avi	1080.670	30.0	No focal subject	1	193.443		STATE	493.743	495.917	2.174
ChR2_Optical_RI13A_R9_99_I2E_06_02_2016_15_40_19_174	2019-08-17 19:55:36	E:/Aggression Videos/Bailey1/ChR2_Optical_RI13A_R9_99_I2E_06_02_2016_15_40_19_174/ChR2_Optical_RI13A_R9_99_I2E_06_02_2016_15_40_19_174_0.avi	1080.670	30.0	No focal subject	1	201.034		STATE	501.334	502.934	1.600
ChR2_Optical_RI13A_R9_99_I2E_06_02_2016_15_40_19_174	2019-08-17 19:55:36	E:/Aggression Videos/Bailey1/ChR2_Optical_RI13A_R9_99_I2E_06_02_2016_15_40_19_174/ChR2_Optical_RI13A_R9_99_I2E_06_02_2016_15_40_19_174_0.avi	1080.670	30.0	No focal subject	1	211.793		STATE	512.093	513.918	1.825
ChR2_Optical_RI13A_R9_99_I2E_06_02_2016_15_40_19_174	2019-08-17 19:55:36	E:/Aggression Videos/Bailey1/ChR2_Optical_RI13A_R9_99_I2E_06_02_2016_15_40_19_174/ChR2_Optical_RI13A_R9_99_I2E_06_02_2016_15_40_19_174_0.avi	1080.670	30.0	No focal subject	2	231.026		STATE	531.326	540.067	8.741
ChR2_Optical_RI13A_R9_99_I2E_06_02_2016_15_40_19_174	2019-08-17 19:55:36	E:/Aggression Videos/Bailey1/ChR2_Optical_RI13A_R9_99_I2E_06_02_2016_15_40_19_174/ChR2_Optical_RI13A_R9_99_I2E_06_02_2016_15_40_19_174_0.avi	1080.670	30.0	No focal subject	6	242.001		STATE	542.301	553.201	10.900
ChR2_Optical_RI13A_R9_99_I2E_06_02_2016_15_40_19_174	2019-08-17 19:55:36	E:/Aggression Videos/Bailey1/ChR2_Optical_RI13A_R9_99_I2E_06_02_2016_15_40_19_174/ChR2_Optical_RI13A_R9_99_I2E_06_02_2016_15_40_19_174_0.avi	1080.670	30.0	No focal subject	1	261.527		STATE	561.827	562.650	0.823
ChR2_Optical_RI13A_R9_99_I2E_06_02_2016_15_40_19_174	2019-08-17 19:55:36	E:/Aggression Videos/Bailey1/ChR2_Optical_RI13A_R9_99_I2E_06_02_2016_15_40_19_174/ChR2_Optical_RI13A_R9_99_I2E_06_02_2016_15_40_19_174_0.avi	1080.670	30.0	No focal subject	4	262.659		STATE	562.959	565.434	2.475
ChR2_Optical_RI13A_R9_99_I2E_06_02_2016_15_40_19_174	2019-08-17 19:55:36	E:/Aggression Videos/Bailey1/ChR2_Optical_RI13A_R9_99_I2E_06_02_2016_15_40_19_174/ChR2_Optical_RI13A_R9_99_I2E_06_02_2016_15_40_19_174_0.avi	1080.670	30.0	No focal subject	2	290.747		STATE	591.047	592.023	0.976
ChR2_Optical_RI13A_R9_99_I2E_06_02_2016_15_40_19_174	2019-08-17 19:55:36	E:/Aggression Videos/Bailey1/ChR2_Optical_RI13A_R9_99_I2E_06_02_2016_15_40_19_174/ChR2_Optical_RI13A_R9_99_I2E_06_02_2016_15_40_19_174_0.avi	1080.670	30.0	No focal subject	8	300.233		STATE	600.533	660.600	60.067
ChR2_Optical_RI13A_R9_99_I2E_06_02_2016_15_40_19_174	2019-08-17 19:55:36	E:/Aggression Videos/Bailey1/ChR2_Optical_RI13A_R9_99_I2E_06_02_2016_15_40_19_174/ChR2_Optical_RI13A_R9_99_I2E_06_02_2016_15_40_19_174_0.avi	1080.670	30.0	No focal subject	2	334.001		STATE	634.301	636.075	1.774
ChR2_Optical_RI13A_R9_99_I2E_06_02_2016_15_40_19_174	2019-08-17 19:55:36	E:/Aggression Videos/Bailey1/ChR2_Optical_RI13A_R9_99_I2E_06_02_2016_15_40_19_174/ChR2_Optical_RI13A_R9_99_I2E_06_02_2016_15_40_19_174_0.avi	1080.670	30.0	No focal subject	2	393.966		STATE	694.266	694.517	0.251
ChR2_Optical_RI13A_R9_99_I2E_06_02_2016_15_40_19_174	2019-08-17 19:55:36	E:/Aggression Videos/Bailey1/ChR2_Optical_RI13A_R9_99_I2E_06_02_2016_15_40_19_174/ChR2_Optical_RI13A_R9_99_I2E_06_02_2016_15_40_19_174_0.avi	1080.670	30.0	No focal subject	1	396.997		STATE	697.297	705.566	8.269
ChR2_Optical_RI13A_R9_99_I2E_06_02_2016_15_40_19_174	2019-08-17 19:55:36	E:/Aggression Videos/Bailey1/ChR2_Optical_RI13A_R9_99_I2E_06_02_2016_15_40_19_174/ChR2_Optical_RI13A_R9_99_I2E_06_02_2016_15_40_19_174_0.avi	1080.670	30.0	No focal subject	8	420.3		STATE	720.600	780.667	60.067
ChR2_Optical_RI13A_R9_99_I2E_06_02_2016_15_40_19_174	2019-08-17 19:55:36	E:/Aggression Videos/Bailey1/ChR2_Optical_RI13A_R9_99_I2E_06_02_2016_15_40_19_174/ChR2_Optical_RI13A_R9_99_I2E_06_02_2016_15_40_19_174_0.avi	1080.670	30.0	No focal subject	1	421.267		STATE	721.567	724.201	2.634
ChR2_Optical_RI13A_R9_99_I2E_06_02_2016_15_40_19_174	2019-08-17 19:55:36	E:/Aggression Videos/Bailey1/ChR2_Optical_RI13A_R9_99_I2E_06_02_2016_15_40_19_174/ChR2_Optical_RI13A_R9_99_I2E_06_02_2016_15_40_19_174_0.avi	1080.670	30.0	No focal subject	1	480.559		STATE	780.859	789.975	9.116
ChR2_Optical_RI13A_R9_99_I2E_06_02_2016_15_40_19_174	2019-08-17 19:55:36	E:/Aggression Videos/Bailey1/ChR2_Optical_RI13A_R9_99_I2E_06_02_2016_15_40_19_174/ChR2_Optical_RI13A_R9_99_I2E_06_02_2016_15_40_19_174_0.avi	1080.670	30.0	No focal subject	2	496.475		STATE	796.775	797.526	0.751
ChR2_Optical_RI13A_R9_99_I2E_06_02_2016_15_40_19_174	2019-08-17 19:55:36	E:/Aggression Videos/Bailey1/ChR2_Optical_RI13A_R9_99_I2E_06_02_2016_15_40_19_174/ChR2_Optical_RI13A_R9_99_I2E_06_02_2016_15_40_19_174_0.avi	1080.670	30.0	No focal subject	6	510.443		STATE	810.743	818.378	7.635
ChR2_Optical_RI13A_R9_99_I2E_06_02_2016_15_40_19_174	2019-08-17 19:55:36	E:/Aggression Videos/Bailey1/ChR2_Optical_RI13A_R9_99_I2E_06_02_2016_15_40_19_174/ChR2_Optical_RI13A_R9_99_I2E_06_02_2016_15_40_19_174_0.avi	1080.670	30.0	No focal subject	7	521.321		STATE	821.621	824.751	3.130
ChR2_Optical_RI13A_R9_99_I2E_06_02_2016_15_40_19_174	2019-08-17 19:55:36	E:/Aggression Videos/Bailey1/ChR2_Optical_RI13A_R9_99_I2E_06_02_2016_15_40_19_174/ChR2_Optical_RI13A_R9_99_I2E_06_02_2016_15_40_19_174_0.avi	1080.670	30.0	No focal subject	4	522.425		STATE	822.725	824.751	2.026
ChR2_Optical_RI13A_R9_99_I2E_06_02_2016_15_40_19_174	2019-08-17 19:55:36	E:/Aggression Videos/Bailey1/ChR2_Optical_RI13A_R9_99_I2E_06_02_2016_15_40_19_174/ChR2_Optical_RI13A_R9_99_I2E_06_02_2016_15_40_19_174_0.avi	1080.670	30.0	No focal subject	6	529.001		STATE	829.301	831.351	2.050
ChR2_Optical_RI13A_R9_99_I2E_06_02_2016_15_40_19_174	2019-08-17 19:55:36	E:/Aggression Videos/Bailey1/ChR2_Optical_RI13A_R9_99_I2E_06_02_2016_15_40_19_174/ChR2_Optical_RI13A_R9_99_I2E_06_02_2016_15_40_19_174_0.avi	1080.670	30.0	No focal subject	4	534.294		STATE	834.594	837.837	3.243
ChR2_Optical_RI13A_R9_99_I2E_06_02_2016_15_40_19_174	2019-08-17 19:55:36	E:/Aggression Videos/Bailey1/ChR2_Optical_RI13A_R9_99_I2E_06_02_2016_15_40_19_174/ChR2_Optical_RI13A_R9_99_I2E_06_02_2016_15_40_19_174_0.avi	1080.670	30.0	No focal subject	6	537.553		STATE	837.853	840.908	3.055
ChR2_Optical_RI13A_R9_99_I2E_06_02_2016_15_40_19_174	2019-08-17 19:55:36	E:/Aggression Videos/Bailey1/ChR2_Optical_RI13A_R9_99_I2E_06_02_2016_15_40_19_174/ChR2_Optical_RI13A_R9_99_I2E_06_02_2016_15_40_19_174_0.avi	1080.670	30.0	No focal subject	8	540.333		STATE	840.633	900.700	60.067
ChR2_Optical_RI13A_R9_99_I2E_06_02_2016_15_40_19_174	2019-08-17 19:55:36	E:/Aggression Videos/Bailey1/ChR2_Optical_RI13A_R9_99_I2E_06_02_2016_15_40_19_174/ChR2_Optical_RI13A_R9_99_I2E_06_02_2016_15_40_19_174_0.avi	1080.670	30.0	No focal subject	4	544.301		STATE	844.601	851.874	7.273
ChR2_Optical_RI13A_R9_99_I2E_06_02_2016_15_40_19_174	2019-08-17 19:55:36	E:/Aggression Videos/Bailey1/ChR2_Optical_RI13A_R9_99_I2E_06_02_2016_15_40_19_174/ChR2_Optical_RI13A_R9_99_I2E_06_02_2016_15_40_19_174_0.avi	1080.670	30.0	No focal subject	4	554.835		STATE	855.135	859.160	4.025
ChR2_Optical_RI13A_R9_99_I2E_06_02_2016_15_40_19_174	2019-08-17 19:55:36	E:/Aggression Videos/Bailey1/ChR2_Optical_RI13A_R9_99_I2E_06_02_2016_15_40_19_174/ChR2_Optical_RI13A_R9_99_I2E_06_02_2016_15_40_19_174_0.avi	1080.670	30.0	No focal subject	6	559.534		STATE	859.834	873.909	14.075
ChR2_Optical_RI13A_R9_99_I2E_06_02_2016_15_40_19_174	2019-08-17 19:55:36	E:/Aggression Videos/Bailey1/ChR2_Optical_RI13A_R9_99_I2E_06_02_2016_15_40_19_174/ChR2_Optical_RI13A_R9_99_I2E_06_02_2016_15_40_19_174_0.avi	1080.670	30.0	No focal subject	7	578.609		STATE	878.909	881.233	2.324
ChR2_Optical_RI13A_R9_99_I2E_06_02_2016_15_40_19_174	2019-08-17 19:55:36	E:/Aggression Videos/Bailey1/ChR2_Optical_RI13A_R9_99_I2E_06_02_2016_15_40_19_174/ChR2_Optical_RI13A_R9_99_I2E_06_02_2016_15_40_19_174_0.avi	1080.670	30.0	No focal subject	6	583.733		STATE	884.033	888.404	4.371
ChR2_Optical_RI13A_R9_99_I2E_06_02_2016_15_40_19_174	2019-08-17 19:55:36	E:/Aggression Videos/Bailey1/ChR2_Optical_RI13A_R9_99_I2E_06_02_2016_15_40_19_174/ChR2_Optical_RI13A_R9_99_I2E_06_02_2016_15_40_19_174_0.avi	1080.670	30.0	No focal subject	6	594.313		STATE	894.613	903.405	8.792
ChR2_Optical_RI13A_R9_99_I2E_06_02_2016_15_40_19_174	2019-08-17 19:55:36	E:/Aggression Videos/Bailey1/ChR2_Optical_RI13A_R9_99_I2E_06_02_2016_15_40_19_174/ChR2_Optical_RI13A_R9_99_I2E_06_02_2016_15_40_19_174_0.avi	1080.670	30.0	No focal subject	7	604.155		STATE	904.455	906.104	1.649
ChR2_Optical_RI13A_R9_99_I2E_06_02_2016_15_40_19_174	2019-08-17 19:55:36	E:/Aggression Videos/Bailey1/ChR2_Optical_RI13A_R9_99_I2E_06_02_2016_15_40_19_174/ChR2_Optical_RI13A_R9_99_I2E_06_02_2016_15_40_19_174_0.avi	1080.670	30.0	No focal subject	1	607.771		STATE	908.071	925.322	17.251
ChR2_Optical_RI13A_R9_99_I2E_06_02_2016_15_40_19_174	2019-08-17 19:55:36	E:/Aggression Videos/Bailey1/ChR2_Optical_RI13A_R9_99_I2E_06_02_2016_15_40_19_174/ChR2_Optical_RI13A_R9_99_I2E_06_02_2016_15_40_19_174_0.avi	1080.670	30.0	No focal subject	1	633.046		STATE	933.346	944.879	11.533
ChR2_Optical_RI13A_R9_99_I2E_06_02_2016_15_40_19_174	2019-08-17 19:55:36	E:/Aggression Videos/Bailey1/ChR2_Optical_RI13A_R9_99_I2E_06_02_2016_15_40_19_174/ChR2_Optical_RI13A_R9_99_I2E_06_02_2016_15_40_19_174_0.avi	1080.670	30.0	No focal subject	1	649.783		STATE	950.083	955.784	5.701
ChR2_Optical_RI13A_R9_99_I2E_06_02_2016_15_40_19_174	2019-08-17 19:55:36	E:/Aggression Videos/Bailey1/ChR2_Optical_RI13A_R9_99_I2E_06_02_2016_15_40_19_174/ChR2_Optical_RI13A_R9_99_I2E_06_02_2016_15_40_19_174_0.avi	1080.670	30.0	No focal subject	1	666.426		STATE	966.726	986.143	19.417
ChR2_Optical_RI13A_R9_99_I2E_06_02_2016_15_40_19_174	2019-08-17 19:55:36	E:/Aggression Videos/Bailey1/ChR2_Optical_RI13A_R9_99_I2E_06_02_2016_15_40_19_174/ChR2_Optical_RI13A_R9_99_I2E_06_02_2016_15_40_19_174_0.avi	1080.670	30.0	No focal subject	2	693.5		STATE	993.800	994.575	0.775
ChR2_Optical_RI13A_R9_99_I2E_06_02_2016_15_40_19_174	2019-08-17 19:55:36	E:/Aggression Videos/Bailey1/ChR2_Optical_RI13A_R9_99_I2E_06_02_2016_15_40_19_174/ChR2_Optical_RI13A_R9_99_I2E_06_02_2016_15_40_19_174_0.avi	1080.670	30.0	No focal subject	7	695.025		STATE	995.325	998.001	2.676
ChR2_Optical_RI13A_R9_99_I2E_06_02_2016_15_40_19_174	2019-08-17 19:55:36	E:/Aggression Videos/Bailey1/ChR2_Optical_RI13A_R9_99_I2E_06_02_2016_15_40_19_174/ChR2_Optical_RI13A_R9_99_I2E_06_02_2016_15_40_19_174_0.avi	1080.670	30.0	No focal subject	6	697.701		STATE	998.001	1022.300	24.299
ChR2_Optical_RI13A_R9_99_I2E_06_02_2016_15_40_19_174	2019-08-17 19:55:36	E:/Aggression Videos/Bailey1/ChR2_Optical_RI13A_R9_99_I2E_06_02_2016_15_40_19_174/ChR2_Optical_RI13A_R9_99_I2E_06_02_2016_15_40_19_174_0.avi	1080.670	30.0	No focal subject	6	722.676		STATE	1022.976	1027.300	4.324
ChR2_Optical_RI13A_R9_99_I2E_06_02_2016_15_40_19_174	2019-08-17 19:55:36	E:/Aggression Videos/Bailey1/ChR2_Optical_RI13A_R9_99_I2E_06_02_2016_15_40_19_174/ChR2_Optical_RI13A_R9_99_I2E_06_02_2016_15_40_19_174_0.avi	1080.670	30.0	No focal subject	6	728.684		STATE	1028.984	1031.351	2.367
ChR2_Optical_RI13A_R9_99_I2E_06_02_2016_15_40_19_174	2019-08-17 19:55:36	E:/Aggression Videos/Bailey1/ChR2_Optical_RI13A_R9_99_I2E_06_02_2016_15_40_19_174/ChR2_Optical_RI13A_R9_99_I2E_06_02_2016_15_40_19_174_0.avi	1080.670	30.0	No focal subject	4	731.608		STATE	1031.908	1033.034	1.126
ChR2_Optical_RI13A_R9_99_I2E_06_02_2016_15_40_19_174	2019-08-17 19:55:36	E:/Aggression Videos/Bailey1/ChR2_Optical_RI13A_R9_99_I2E_06_02_2016_15_40_19_174/ChR2_Optical_RI13A_R9_99_I2E_06_02_2016_15_40_19_174_0.avi	1080.670	30.0	No focal subject	1	736.084		STATE	1036.384	1039.208	2.824
ChR2_Optical_RI13A_R9_99_I2E_06_02_2016_15_40_19_174	2019-08-17 19:55:36	E:/Aggression Videos/Bailey1/ChR2_Optical_RI13A_R9_99_I2E_06_02_2016_15_40_19_174/ChR2_Optical_RI13A_R9_99_I2E_06_02_2016_15_40_19_174_0.avi	1080.670	30.0	No focal subject	2	742.943		STATE	1043.243	1044.034	0.791
ChR2_Optical_RI13A_R9_99_I2E_06_02_2016_15_40_19_174	2019-08-17 19:55:36	E:/Aggression Videos/Bailey1/ChR2_Optical_RI13A_R9_99_I2E_06_02_2016_15_40_19_174/ChR2_Optical_RI13A_R9_99_I2E_06_02_2016_15_40_19_174_0.avi	1080.670	30.0	No focal subject	6	745.284		STATE	1045.584	1055.008	9.424
ChR2_Optical_RI13A_R9_99_I2E_06_02_2016_15_40_19_174	2019-08-17 19:55:36	E:/Aggression Videos/Bailey1/ChR2_Optical_RI13A_R9_99_I2E_06_02_2016_15_40_19_174/ChR2_Optical_RI13A_R9_99_I2E_06_02_2016_15_40_19_174_0.avi	1080.670	30.0	No focal subject	2	760.184		STATE	1060.484	1061.084	0.600

## Sheet: 13B
Observation id	Observation date	Media file	Total length	FPS	Subject	Behavior	Behavioral category	Modifiers	Behavior type	Start (s)	Stop (s)	Duration (s)	Comment start	Comment stop
ChR2_Optical_RI13B_R9_99_I1G_07_01_2016_15_40_19_174	2019-08-17 20:45:58	E:/Aggression Videos/Bailey1/ChR2_Optical_RI13B_R9_99_I1G_07_01_2016_15_40_19_174/ChR2_Optical_RI13B_R9_99_I1G_07_01_2016_15_40_19_174_0.avi	1085.030	30.0	No focal subject	0	-0.391		POINT	299.842	299.842	NA
ChR2_Optical_RI13B_R9_99_I1G_07_01_2016_15_40_19_174	2019-08-17 20:45:58	E:/Aggression Videos/Bailey1/ChR2_Optical_RI13B_R9_99_I1G_07_01_2016_15_40_19_174/ChR2_Optical_RI13B_R9_99_I1G_07_01_2016_15_40_19_174_0.avi	1085.030	30.0	No focal subject	2	7.634		STATE	307.867	318.491	10.624
ChR2_Optical_RI13B_R9_99_I1G_07_01_2016_15_40_19_174	2019-08-17 20:45:58	E:/Aggression Videos/Bailey1/ChR2_Optical_RI13B_R9_99_I1G_07_01_2016_15_40_19_174/ChR2_Optical_RI13B_R9_99_I1G_07_01_2016_15_40_19_174_0.avi	1085.030	30.0	No focal subject	2	19.808		STATE	320.041	323.941	3.900
ChR2_Optical_RI13B_R9_99_I1G_07_01_2016_15_40_19_174	2019-08-17 20:45:58	E:/Aggression Videos/Bailey1/ChR2_Optical_RI13B_R9_99_I1G_07_01_2016_15_40_19_174/ChR2_Optical_RI13B_R9_99_I1G_07_01_2016_15_40_19_174_0.avi	1085.030	30.0	No focal subject	2	26.176		STATE	326.409	331.335	4.926
ChR2_Optical_RI13B_R9_99_I1G_07_01_2016_15_40_19_174	2019-08-17 20:45:58	E:/Aggression Videos/Bailey1/ChR2_Optical_RI13B_R9_99_I1G_07_01_2016_15_40_19_174/ChR2_Optical_RI13B_R9_99_I1G_07_01_2016_15_40_19_174_0.avi	1085.030	30.0	No focal subject	6	34.281		STATE	334.514	336.798	2.284
ChR2_Optical_RI13B_R9_99_I1G_07_01_2016_15_40_19_174	2019-08-17 20:45:58	E:/Aggression Videos/Bailey1/ChR2_Optical_RI13B_R9_99_I1G_07_01_2016_15_40_19_174/ChR2_Optical_RI13B_R9_99_I1G_07_01_2016_15_40_19_174_0.avi	1085.030	30.0	No focal subject	2	36.565		STATE	336.798	338.722	1.924
ChR2_Optical_RI13B_R9_99_I1G_07_01_2016_15_40_19_174	2019-08-17 20:45:58	E:/Aggression Videos/Bailey1/ChR2_Optical_RI13B_R9_99_I1G_07_01_2016_15_40_19_174/ChR2_Optical_RI13B_R9_99_I1G_07_01_2016_15_40_19_174_0.avi	1085.030	30.0	No focal subject	6	40.208		STATE	340.441	345.623	5.182
ChR2_Optical_RI13B_R9_99_I1G_07_01_2016_15_40_19_174	2019-08-17 20:45:58	E:/Aggression Videos/Bailey1/ChR2_Optical_RI13B_R9_99_I1G_07_01_2016_15_40_19_174/ChR2_Optical_RI13B_R9_99_I1G_07_01_2016_15_40_19_174_0.avi	1085.030	30.0	No focal subject	8	60		STATE	360.233	419.533	59.300
ChR2_Optical_RI13B_R9_99_I1G_07_01_2016_15_40_19_174	2019-08-17 20:45:58	E:/Aggression Videos/Bailey1/ChR2_Optical_RI13B_R9_99_I1G_07_01_2016_15_40_19_174/ChR2_Optical_RI13B_R9_99_I1G_07_01_2016_15_40_19_174_0.avi	1085.030	30.0	No focal subject	2	74.692		STATE	374.925	375.175	0.250
ChR2_Optical_RI13B_R9_99_I1G_07_01_2016_15_40_19_174	2019-08-17 20:45:58	E:/Aggression Videos/Bailey1/ChR2_Optical_RI13B_R9_99_I1G_07_01_2016_15_40_19_174/ChR2_Optical_RI13B_R9_99_I1G_07_01_2016_15_40_19_174_0.avi	1085.030	30.0	No focal subject	2	94.801		STATE	395.034	395.809	0.775
ChR2_Optical_RI13B_R9_99_I1G_07_01_2016_15_40_19_174	2019-08-17 20:45:58	E:/Aggression Videos/Bailey1/ChR2_Optical_RI13B_R9_99_I1G_07_01_2016_15_40_19_174/ChR2_Optical_RI13B_R9_99_I1G_07_01_2016_15_40_19_174_0.avi	1085.030	30.0	No focal subject	2	104.593		STATE	404.826	405.076	0.250
ChR2_Optical_RI13B_R9_99_I1G_07_01_2016_15_40_19_174	2019-08-17 20:45:58	E:/Aggression Videos/Bailey1/ChR2_Optical_RI13B_R9_99_I1G_07_01_2016_15_40_19_174/ChR2_Optical_RI13B_R9_99_I1G_07_01_2016_15_40_19_174_0.avi	1085.030	30.0	No focal subject	2	142.477		STATE	442.710	443.758	1.048
ChR2_Optical_RI13B_R9_99_I1G_07_01_2016_15_40_19_174	2019-08-17 20:45:58	E:/Aggression Videos/Bailey1/ChR2_Optical_RI13B_R9_99_I1G_07_01_2016_15_40_19_174/ChR2_Optical_RI13B_R9_99_I1G_07_01_2016_15_40_19_174_0.avi	1085.030	30.0	No focal subject	2	152.325		STATE	452.558	462.384	9.826
ChR2_Optical_RI13B_R9_99_I1G_07_01_2016_15_40_19_174	2019-08-17 20:45:58	E:/Aggression Videos/Bailey1/ChR2_Optical_RI13B_R9_99_I1G_07_01_2016_15_40_19_174/ChR2_Optical_RI13B_R9_99_I1G_07_01_2016_15_40_19_174_0.avi	1085.030	30.0	No focal subject	2	167.593		STATE	467.826	468.600	0.774
ChR2_Optical_RI13B_R9_99_I1G_07_01_2016_15_40_19_174	2019-08-17 20:45:58	E:/Aggression Videos/Bailey1/ChR2_Optical_RI13B_R9_99_I1G_07_01_2016_15_40_19_174/ChR2_Optical_RI13B_R9_99_I1G_07_01_2016_15_40_19_174_0.avi	1085.030	30.0	No focal subject	2	177.842		STATE	478.075	480.534	2.459
ChR2_Optical_RI13B_R9_99_I1G_07_01_2016_15_40_19_174	2019-08-17 20:45:58	E:/Aggression Videos/Bailey1/ChR2_Optical_RI13B_R9_99_I1G_07_01_2016_15_40_19_174/ChR2_Optical_RI13B_R9_99_I1G_07_01_2016_15_40_19_174_0.avi	1085.030	30.0	No focal subject	8	180.134		STATE	480.367	539.900	59.533
ChR2_Optical_RI13B_R9_99_I1G_07_01_2016_15_40_19_174	2019-08-17 20:45:58	E:/Aggression Videos/Bailey1/ChR2_Optical_RI13B_R9_99_I1G_07_01_2016_15_40_19_174/ChR2_Optical_RI13B_R9_99_I1G_07_01_2016_15_40_19_174_0.avi	1085.030	30.0	No focal subject	6	187.861		STATE	488.094	490.212	2.118
ChR2_Optical_RI13B_R9_99_I1G_07_01_2016_15_40_19_174	2019-08-17 20:45:58	E:/Aggression Videos/Bailey1/ChR2_Optical_RI13B_R9_99_I1G_07_01_2016_15_40_19_174/ChR2_Optical_RI13B_R9_99_I1G_07_01_2016_15_40_19_174_0.avi	1085.030	30.0	No focal subject	1	197.967		STATE	498.200	500.501	2.301
ChR2_Optical_RI13B_R9_99_I1G_07_01_2016_15_40_19_174	2019-08-17 20:45:58	E:/Aggression Videos/Bailey1/ChR2_Optical_RI13B_R9_99_I1G_07_01_2016_15_40_19_174/ChR2_Optical_RI13B_R9_99_I1G_07_01_2016_15_40_19_174_0.avi	1085.030	30.0	No focal subject	2	214.767		STATE	515.000	515.751	0.751
ChR2_Optical_RI13B_R9_99_I1G_07_01_2016_15_40_19_174	2019-08-17 20:45:58	E:/Aggression Videos/Bailey1/ChR2_Optical_RI13B_R9_99_I1G_07_01_2016_15_40_19_174/ChR2_Optical_RI13B_R9_99_I1G_07_01_2016_15_40_19_174_0.avi	1085.030	30.0	No focal subject	2	219.201		STATE	519.434	520.234	0.800
ChR2_Optical_RI13B_R9_99_I1G_07_01_2016_15_40_19_174	2019-08-17 20:45:58	E:/Aggression Videos/Bailey1/ChR2_Optical_RI13B_R9_99_I1G_07_01_2016_15_40_19_174/ChR2_Optical_RI13B_R9_99_I1G_07_01_2016_15_40_19_174_0.avi	1085.030	30.0	No focal subject	2	223.73		STATE	523.963	530.963	7.000
ChR2_Optical_RI13B_R9_99_I1G_07_01_2016_15_40_19_174	2019-08-17 20:45:58	E:/Aggression Videos/Bailey1/ChR2_Optical_RI13B_R9_99_I1G_07_01_2016_15_40_19_174/ChR2_Optical_RI13B_R9_99_I1G_07_01_2016_15_40_19_174_0.avi	1085.030	30.0	No focal subject	1	231.251		STATE	531.484	532.008	0.524
ChR2_Optical_RI13B_R9_99_I1G_07_01_2016_15_40_19_174	2019-08-17 20:45:58	E:/Aggression Videos/Bailey1/ChR2_Optical_RI13B_R9_99_I1G_07_01_2016_15_40_19_174/ChR2_Optical_RI13B_R9_99_I1G_07_01_2016_15_40_19_174_0.avi	1085.030	30.0	No focal subject	6	247.696		STATE	547.929	552.328	4.399
ChR2_Optical_RI13B_R9_99_I1G_07_01_2016_15_40_19_174	2019-08-17 20:45:58	E:/Aggression Videos/Bailey1/ChR2_Optical_RI13B_R9_99_I1G_07_01_2016_15_40_19_174/ChR2_Optical_RI13B_R9_99_I1G_07_01_2016_15_40_19_174_0.avi	1085.030	30.0	No focal subject	7	260.517		STATE	560.750	564.653	3.903
ChR2_Optical_RI13B_R9_99_I1G_07_01_2016_15_40_19_174	2019-08-17 20:45:58	E:/Aggression Videos/Bailey1/ChR2_Optical_RI13B_R9_99_I1G_07_01_2016_15_40_19_174/ChR2_Optical_RI13B_R9_99_I1G_07_01_2016_15_40_19_174_0.avi	1085.030	30.0	No focal subject	3	263.043		STATE	563.276	564.276	1.000
ChR2_Optical_RI13B_R9_99_I1G_07_01_2016_15_40_19_174	2019-08-17 20:45:58	E:/Aggression Videos/Bailey1/ChR2_Optical_RI13B_R9_99_I1G_07_01_2016_15_40_19_174/ChR2_Optical_RI13B_R9_99_I1G_07_01_2016_15_40_19_174_0.avi	1085.030	30.0	No focal subject	2	289.684		STATE	589.917	598.267	8.350
ChR2_Optical_RI13B_R9_99_I1G_07_01_2016_15_40_19_174	2019-08-17 20:45:58	E:/Aggression Videos/Bailey1/ChR2_Optical_RI13B_R9_99_I1G_07_01_2016_15_40_19_174/ChR2_Optical_RI13B_R9_99_I1G_07_01_2016_15_40_19_174_0.avi	1085.030	30.0	No focal subject	8	300.267		STATE	600.500	659.833	59.333
ChR2_Optical_RI13B_R9_99_I1G_07_01_2016_15_40_19_174	2019-08-17 20:45:58	E:/Aggression Videos/Bailey1/ChR2_Optical_RI13B_R9_99_I1G_07_01_2016_15_40_19_174/ChR2_Optical_RI13B_R9_99_I1G_07_01_2016_15_40_19_174_0.avi	1085.030	30.0	No focal subject	2	300.36		STATE	600.593	610.167	9.574
ChR2_Optical_RI13B_R9_99_I1G_07_01_2016_15_40_19_174	2019-08-17 20:45:58	E:/Aggression Videos/Bailey1/ChR2_Optical_RI13B_R9_99_I1G_07_01_2016_15_40_19_174/ChR2_Optical_RI13B_R9_99_I1G_07_01_2016_15_40_19_174_0.avi	1085.030	30.0	No focal subject	2	312.809		STATE	613.042	621.343	8.301
ChR2_Optical_RI13B_R9_99_I1G_07_01_2016_15_40_19_174	2019-08-17 20:45:58	E:/Aggression Videos/Bailey1/ChR2_Optical_RI13B_R9_99_I1G_07_01_2016_15_40_19_174/ChR2_Optical_RI13B_R9_99_I1G_07_01_2016_15_40_19_174_0.avi	1085.030	30.0	No focal subject	1	324.785		STATE	625.018	631.717	6.699
ChR2_Optical_RI13B_R9_99_I1G_07_01_2016_15_40_19_174	2019-08-17 20:45:58	E:/Aggression Videos/Bailey1/ChR2_Optical_RI13B_R9_99_I1G_07_01_2016_15_40_19_174/ChR2_Optical_RI13B_R9_99_I1G_07_01_2016_15_40_19_174_0.avi	1085.030	30.0	No focal subject	2	345.99		STATE	646.223	647.825	1.602
ChR2_Optical_RI13B_R9_99_I1G_07_01_2016_15_40_19_174	2019-08-17 20:45:58	E:/Aggression Videos/Bailey1/ChR2_Optical_RI13B_R9_99_I1G_07_01_2016_15_40_19_174/ChR2_Optical_RI13B_R9_99_I1G_07_01_2016_15_40_19_174_0.avi	1085.030	30.0	No focal subject	1	364.735		STATE	664.968	667.292	2.324
ChR2_Optical_RI13B_R9_99_I1G_07_01_2016_15_40_19_174	2019-08-17 20:45:58	E:/Aggression Videos/Bailey1/ChR2_Optical_RI13B_R9_99_I1G_07_01_2016_15_40_19_174/ChR2_Optical_RI13B_R9_99_I1G_07_01_2016_15_40_19_174_0.avi	1085.030	30.0	No focal subject	2	380.559		STATE	680.792	684.068	3.276
ChR2_Optical_RI13B_R9_99_I1G_07_01_2016_15_40_19_174	2019-08-17 20:45:58	E:/Aggression Videos/Bailey1/ChR2_Optical_RI13B_R9_99_I1G_07_01_2016_15_40_19_174/ChR2_Optical_RI13B_R9_99_I1G_07_01_2016_15_40_19_174_0.avi	1085.030	30.0	No focal subject	2	387.459		STATE	687.692	694.066	6.374
ChR2_Optical_RI13B_R9_99_I1G_07_01_2016_15_40_19_174	2019-08-17 20:45:58	E:/Aggression Videos/Bailey1/ChR2_Optical_RI13B_R9_99_I1G_07_01_2016_15_40_19_174/ChR2_Optical_RI13B_R9_99_I1G_07_01_2016_15_40_19_174_0.avi	1085.030	30.0	No focal subject	1	402.533		STATE	702.766	706.645	3.879
ChR2_Optical_RI13B_R9_99_I1G_07_01_2016_15_40_19_174	2019-08-17 20:45:58	E:/Aggression Videos/Bailey1/ChR2_Optical_RI13B_R9_99_I1G_07_01_2016_15_40_19_174/ChR2_Optical_RI13B_R9_99_I1G_07_01_2016_15_40_19_174_0.avi	1085.030	30.0	No focal subject	8	420.367		STATE	720.600	779.900	59.300
ChR2_Optical_RI13B_R9_99_I1G_07_01_2016_15_40_19_174	2019-08-17 20:45:58	E:/Aggression Videos/Bailey1/ChR2_Optical_RI13B_R9_99_I1G_07_01_2016_15_40_19_174/ChR2_Optical_RI13B_R9_99_I1G_07_01_2016_15_40_19_174_0.avi	1085.030	30.0	No focal subject	2	448.63		STATE	748.863	754.015	5.152
ChR2_Optical_RI13B_R9_99_I1G_07_01_2016_15_40_19_174	2019-08-17 20:45:58	E:/Aggression Videos/Bailey1/ChR2_Optical_RI13B_R9_99_I1G_07_01_2016_15_40_19_174/ChR2_Optical_RI13B_R9_99_I1G_07_01_2016_15_40_19_174_0.avi	1085.030	30.0	No focal subject	1	487.467		STATE	787.700	790.800	3.100
ChR2_Optical_RI13B_R9_99_I1G_07_01_2016_15_40_19_174	2019-08-17 20:45:58	E:/Aggression Videos/Bailey1/ChR2_Optical_RI13B_R9_99_I1G_07_01_2016_15_40_19_174/ChR2_Optical_RI13B_R9_99_I1G_07_01_2016_15_40_19_174_0.avi	1085.030	30.0	No focal subject	2	490.567		STATE	790.800	792.330	1.530
ChR2_Optical_RI13B_R9_99_I1G_07_01_2016_15_40_19_174	2019-08-17 20:45:58	E:/Aggression Videos/Bailey1/ChR2_Optical_RI13B_R9_99_I1G_07_01_2016_15_40_19_174/ChR2_Optical_RI13B_R9_99_I1G_07_01_2016_15_40_19_174_0.avi	1085.030	30.0	No focal subject	2	500.767		STATE	801.000	802.901	1.901
ChR2_Optical_RI13B_R9_99_I1G_07_01_2016_15_40_19_174	2019-08-17 20:45:58	E:/Aggression Videos/Bailey1/ChR2_Optical_RI13B_R9_99_I1G_07_01_2016_15_40_19_174/ChR2_Optical_RI13B_R9_99_I1G_07_01_2016_15_40_19_174_0.avi	1085.030	30.0	No focal subject	2	503.443		STATE	803.676	804.451	0.775
ChR2_Optical_RI13B_R9_99_I1G_07_01_2016_15_40_19_174	2019-08-17 20:45:58	E:/Aggression Videos/Bailey1/ChR2_Optical_RI13B_R9_99_I1G_07_01_2016_15_40_19_174/ChR2_Optical_RI13B_R9_99_I1G_07_01_2016_15_40_19_174_0.avi	1085.030	30.0	No focal subject	2	517.589		STATE	817.822	822.025	4.203
ChR2_Optical_RI13B_R9_99_I1G_07_01_2016_15_40_19_174	2019-08-17 20:45:58	E:/Aggression Videos/Bailey1/ChR2_Optical_RI13B_R9_99_I1G_07_01_2016_15_40_19_174/ChR2_Optical_RI13B_R9_99_I1G_07_01_2016_15_40_19_174_0.avi	1085.030	30.0	No focal subject	2	531.992		STATE	832.225	840.600	8.375
ChR2_Optical_RI13B_R9_99_I1G_07_01_2016_15_40_19_174	2019-08-17 20:45:58	E:/Aggression Videos/Bailey1/ChR2_Optical_RI13B_R9_99_I1G_07_01_2016_15_40_19_174/ChR2_Optical_RI13B_R9_99_I1G_07_01_2016_15_40_19_174_0.avi	1085.030	30.0	No focal subject	8	540.334		STATE	840.567	899.867	59.300
ChR2_Optical_RI13B_R9_99_I1G_07_01_2016_15_40_19_174	2019-08-17 20:45:58	E:/Aggression Videos/Bailey1/ChR2_Optical_RI13B_R9_99_I1G_07_01_2016_15_40_19_174/ChR2_Optical_RI13B_R9_99_I1G_07_01_2016_15_40_19_174_0.avi	1085.030	30.0	No focal subject	2	558.918		STATE	859.151	861.466	2.315
ChR2_Optical_RI13B_R9_99_I1G_07_01_2016_15_40_19_174	2019-08-17 20:45:58	E:/Aggression Videos/Bailey1/ChR2_Optical_RI13B_R9_99_I1G_07_01_2016_15_40_19_174/ChR2_Optical_RI13B_R9_99_I1G_07_01_2016_15_40_19_174_0.avi	1085.030	30.0	No focal subject	1	562.119		STATE	862.352	864.191	1.839
ChR2_Optical_RI13B_R9_99_I1G_07_01_2016_15_40_19_174	2019-08-17 20:45:58	E:/Aggression Videos/Bailey1/ChR2_Optical_RI13B_R9_99_I1G_07_01_2016_15_40_19_174/ChR2_Optical_RI13B_R9_99_I1G_07_01_2016_15_40_19_174_0.avi	1085.030	30.0	No focal subject	2	564.75		STATE	864.983	882.212	17.229
ChR2_Optical_RI13B_R9_99_I1G_07_01_2016_15_40_19_174	2019-08-17 20:45:58	E:/Aggression Videos/Bailey1/ChR2_Optical_RI13B_R9_99_I1G_07_01_2016_15_40_19_174/ChR2_Optical_RI13B_R9_99_I1G_07_01_2016_15_40_19_174_0.avi	1085.030	30.0	No focal subject	2	583.326		STATE	883.559	910.524	26.965
ChR2_Optical_RI13B_R9_99_I1G_07_01_2016_15_40_19_174	2019-08-17 20:45:58	E:/Aggression Videos/Bailey1/ChR2_Optical_RI13B_R9_99_I1G_07_01_2016_15_40_19_174/ChR2_Optical_RI13B_R9_99_I1G_07_01_2016_15_40_19_174_0.avi	1085.030	30.0	No focal subject	1	638.242		STATE	938.475	941.031	2.556
ChR2_Optical_RI13B_R9_99_I1G_07_01_2016_15_40_19_174	2019-08-17 20:45:58	E:/Aggression Videos/Bailey1/ChR2_Optical_RI13B_R9_99_I1G_07_01_2016_15_40_19_174/ChR2_Optical_RI13B_R9_99_I1G_07_01_2016_15_40_19_174_0.avi	1085.030	30.0	No focal subject	1	648.408		STATE	948.641	952.041	3.400
ChR2_Optical_RI13B_R9_99_I1G_07_01_2016_15_40_19_174	2019-08-17 20:45:58	E:/Aggression Videos/Bailey1/ChR2_Optical_RI13B_R9_99_I1G_07_01_2016_15_40_19_174/ChR2_Optical_RI13B_R9_99_I1G_07_01_2016_15_40_19_174_0.avi	1085.030	30.0	No focal subject	2	657.683		STATE	957.916	961.793	3.877
ChR2_Optical_RI13B_R9_99_I1G_07_01_2016_15_40_19_174	2019-08-17 20:45:58	E:/Aggression Videos/Bailey1/ChR2_Optical_RI13B_R9_99_I1G_07_01_2016_15_40_19_174/ChR2_Optical_RI13B_R9_99_I1G_07_01_2016_15_40_19_174_0.avi	1085.030	30.0	No focal subject	1	669.641		STATE	969.874	971.666	1.792
ChR2_Optical_RI13B_R9_99_I1G_07_01_2016_15_40_19_174	2019-08-17 20:45:58	E:/Aggression Videos/Bailey1/ChR2_Optical_RI13B_R9_99_I1G_07_01_2016_15_40_19_174/ChR2_Optical_RI13B_R9_99_I1G_07_01_2016_15_40_19_174_0.avi	1085.030	30.0	No focal subject	2	672.208		STATE	972.441	973.617	1.176
ChR2_Optical_RI13B_R9_99_I1G_07_01_2016_15_40_19_174	2019-08-17 20:45:58	E:/Aggression Videos/Bailey1/ChR2_Optical_RI13B_R9_99_I1G_07_01_2016_15_40_19_174/ChR2_Optical_RI13B_R9_99_I1G_07_01_2016_15_40_19_174_0.avi	1085.030	30.0	No focal subject	2	701.138		STATE	1001.371	1001.642	0.271
ChR2_Optical_RI13B_R9_99_I1G_07_01_2016_15_40_19_174	2019-08-17 20:45:58	E:/Aggression Videos/Bailey1/ChR2_Optical_RI13B_R9_99_I1G_07_01_2016_15_40_19_174/ChR2_Optical_RI13B_R9_99_I1G_07_01_2016_15_40_19_174_0.avi	1085.030	30.0	No focal subject	2	720.509		STATE	1020.742	1022.274	1.532
ChR2_Optical_RI13B_R9_99_I1G_07_01_2016_15_40_19_174	2019-08-17 20:45:58	E:/Aggression Videos/Bailey1/ChR2_Optical_RI13B_R9_99_I1G_07_01_2016_15_40_19_174/ChR2_Optical_RI13B_R9_99_I1G_07_01_2016_15_40_19_174_0.avi	1085.030	30.0	No focal subject	6	723.591		STATE	1023.824	1030.887	7.063
ChR2_Optical_RI13B_R9_99_I1G_07_01_2016_15_40_19_174	2019-08-17 20:45:58	E:/Aggression Videos/Bailey1/ChR2_Optical_RI13B_R9_99_I1G_07_01_2016_15_40_19_174/ChR2_Optical_RI13B_R9_99_I1G_07_01_2016_15_40_19_174_0.avi	1085.030	30.0	No focal subject	1	733.395		STATE	1033.628	1035.652	2.024
ChR2_Optical_RI13B_R9_99_I1G_07_01_2016_15_40_19_174	2019-08-17 20:45:58	E:/Aggression Videos/Bailey1/ChR2_Optical_RI13B_R9_99_I1G_07_01_2016_15_40_19_174/ChR2_Optical_RI13B_R9_99_I1G_07_01_2016_15_40_19_174_0.avi	1085.030	30.0	No focal subject	3	736.337		STATE	1036.570	1038.120	1.550
ChR2_Optical_RI13B_R9_99_I1G_07_01_2016_15_40_19_174	2019-08-17 20:45:58	E:/Aggression Videos/Bailey1/ChR2_Optical_RI13B_R9_99_I1G_07_01_2016_15_40_19_174/ChR2_Optical_RI13B_R9_99_I1G_07_01_2016_15_40_19_174_0.avi	1085.030	30.0	No focal subject	2	755.914		STATE	1056.147	1058.249	2.102
ChR2_Optical_RI13B_R9_99_I1G_07_01_2016_15_40_19_174	2019-08-17 20:45:58	E:/Aggression Videos/Bailey1/ChR2_Optical_RI13B_R9_99_I1G_07_01_2016_15_40_19_174/ChR2_Optical_RI13B_R9_99_I1G_07_01_2016_15_40_19_174_0.avi	1085.030	30.0	No focal subject	2	762.044		STATE	1062.277	1066.994	4.717
ChR2_Optical_RI13B_R9_99_I1G_07_01_2016_15_40_19_174	2019-08-17 20:45:58	E:/Aggression Videos/Bailey1/ChR2_Optical_RI13B_R9_99_I1G_07_01_2016_15_40_19_174/ChR2_Optical_RI13B_R9_99_I1G_07_01_2016_15_40_19_174_0.avi	1085.030	30.0	No focal subject	2	778.25		STATE	1078.483	1084.942	6.459

## Sheet: 13D
Observation id	Observation date	Media file	Total length	FPS	Subject	Behavior	Behavioral category	Modifiers	Behavior type	Start (s)	Stop (s)	Duration (s)	Comment start	Comment stop
RI13D_R9_99_I1K_08_03_2016_15_40_19_174	2019-08-14 21:24:00	E:/Aggression Videos/Bailey1/RI13D_R9_99_I1K_08_03_2016_15_40_19_174/RI13D_R9_99_I1K_08_03_2016_15_40_19_174_0.avi	1080.100	30	No focal subject	0	0.077		POINT	300.810	300.810	NA
RI13D_R9_99_I1K_08_03_2016_15_40_19_174	2019-08-14 21:24:00	E:/Aggression Videos/Bailey1/RI13D_R9_99_I1K_08_03_2016_15_40_19_174/RI13D_R9_99_I1K_08_03_2016_15_40_19_174_0.avi	1080.100	30	No focal subject	2	0.888		STATE	301.621	307.550	5.929
RI13D_R9_99_I1K_08_03_2016_15_40_19_174	2019-08-14 21:24:00	E:/Aggression Videos/Bailey1/RI13D_R9_99_I1K_08_03_2016_15_40_19_174/RI13D_R9_99_I1K_08_03_2016_15_40_19_174_0.avi	1080.100	30	No focal subject	2	43.967		STATE	344.700	362.708	18.008
RI13D_R9_99_I1K_08_03_2016_15_40_19_174	2019-08-14 21:24:00	E:/Aggression Videos/Bailey1/RI13D_R9_99_I1K_08_03_2016_15_40_19_174/RI13D_R9_99_I1K_08_03_2016_15_40_19_174_0.avi	1080.100	30	No focal subject	8	60		STATE	360.733	420.800	60.067
RI13D_R9_99_I1K_08_03_2016_15_40_19_174	2019-08-14 21:24:00	E:/Aggression Videos/Bailey1/RI13D_R9_99_I1K_08_03_2016_15_40_19_174/RI13D_R9_99_I1K_08_03_2016_15_40_19_174_0.avi	1080.100	30	No focal subject	1	62.601		STATE	363.334	365.133	1.799
RI13D_R9_99_I1K_08_03_2016_15_40_19_174	2019-08-14 21:24:00	E:/Aggression Videos/Bailey1/RI13D_R9_99_I1K_08_03_2016_15_40_19_174/RI13D_R9_99_I1K_08_03_2016_15_40_19_174_0.avi	1080.100	30	No focal subject	2	78.776		STATE	379.509	383.659	4.150
RI13D_R9_99_I1K_08_03_2016_15_40_19_174	2019-08-14 21:24:00	E:/Aggression Videos/Bailey1/RI13D_R9_99_I1K_08_03_2016_15_40_19_174/RI13D_R9_99_I1K_08_03_2016_15_40_19_174_0.avi	1080.100	30	No focal subject	2	86.001		STATE	386.734	387.908	1.174
RI13D_R9_99_I1K_08_03_2016_15_40_19_174	2019-08-14 21:24:00	E:/Aggression Videos/Bailey1/RI13D_R9_99_I1K_08_03_2016_15_40_19_174/RI13D_R9_99_I1K_08_03_2016_15_40_19_174_0.avi	1080.100	30	No focal subject	2	90.776		STATE	391.509	394.309	2.800
RI13D_R9_99_I1K_08_03_2016_15_40_19_174	2019-08-14 21:24:00	E:/Aggression Videos/Bailey1/RI13D_R9_99_I1K_08_03_2016_15_40_19_174/RI13D_R9_99_I1K_08_03_2016_15_40_19_174_0.avi	1080.100	30	No focal subject	2	100.325		STATE	401.058	403.933	2.875
RI13D_R9_99_I1K_08_03_2016_15_40_19_174	2019-08-14 21:24:00	E:/Aggression Videos/Bailey1/RI13D_R9_99_I1K_08_03_2016_15_40_19_174/RI13D_R9_99_I1K_08_03_2016_15_40_19_174_0.avi	1080.100	30	No focal subject	2	117.325		STATE	418.058	421.159	3.101
RI13D_R9_99_I1K_08_03_2016_15_40_19_174	2019-08-14 21:24:00	E:/Aggression Videos/Bailey1/RI13D_R9_99_I1K_08_03_2016_15_40_19_174/RI13D_R9_99_I1K_08_03_2016_15_40_19_174_0.avi	1080.100	30	No focal subject	2	136.55		STATE	437.283	438.308	1.025
RI13D_R9_99_I1K_08_03_2016_15_40_19_174	2019-08-14 21:24:00	E:/Aggression Videos/Bailey1/RI13D_R9_99_I1K_08_03_2016_15_40_19_174/RI13D_R9_99_I1K_08_03_2016_15_40_19_174_0.avi	1080.100	30	No focal subject	2	141.226		STATE	441.959	443.008	1.049
RI13D_R9_99_I1K_08_03_2016_15_40_19_174	2019-08-14 21:24:00	E:/Aggression Videos/Bailey1/RI13D_R9_99_I1K_08_03_2016_15_40_19_174/RI13D_R9_99_I1K_08_03_2016_15_40_19_174_0.avi	1080.100	30	No focal subject	2	176.618		STATE	477.351	478.650	1.299
RI13D_R9_99_I1K_08_03_2016_15_40_19_174	2019-08-14 21:24:00	E:/Aggression Videos/Bailey1/RI13D_R9_99_I1K_08_03_2016_15_40_19_174/RI13D_R9_99_I1K_08_03_2016_15_40_19_174_0.avi	1080.100	30	No focal subject	8	179.567		STATE	480.300	539.633	59.333
RI13D_R9_99_I1K_08_03_2016_15_40_19_174	2019-08-14 21:24:00	E:/Aggression Videos/Bailey1/RI13D_R9_99_I1K_08_03_2016_15_40_19_174/RI13D_R9_99_I1K_08_03_2016_15_40_19_174_0.avi	1080.100	30	No focal subject	2	184.792		STATE	485.525	486.551	1.026
RI13D_R9_99_I1K_08_03_2016_15_40_19_174	2019-08-14 21:24:00	E:/Aggression Videos/Bailey1/RI13D_R9_99_I1K_08_03_2016_15_40_19_174/RI13D_R9_99_I1K_08_03_2016_15_40_19_174_0.avi	1080.100	30	No focal subject	2	187.693		STATE	488.426	492.376	3.950
RI13D_R9_99_I1K_08_03_2016_15_40_19_174	2019-08-14 21:24:00	E:/Aggression Videos/Bailey1/RI13D_R9_99_I1K_08_03_2016_15_40_19_174/RI13D_R9_99_I1K_08_03_2016_15_40_19_174_0.avi	1080.100	30	No focal subject	2	216.608		STATE	517.341	522.875	5.534
RI13D_R9_99_I1K_08_03_2016_15_40_19_174	2019-08-14 21:24:00	E:/Aggression Videos/Bailey1/RI13D_R9_99_I1K_08_03_2016_15_40_19_174/RI13D_R9_99_I1K_08_03_2016_15_40_19_174_0.avi	1080.100	30	No focal subject	2	224.942		STATE	525.675	526.700	1.025
RI13D_R9_99_I1K_08_03_2016_15_40_19_174	2019-08-14 21:24:00	E:/Aggression Videos/Bailey1/RI13D_R9_99_I1K_08_03_2016_15_40_19_174/RI13D_R9_99_I1K_08_03_2016_15_40_19_174_0.avi	1080.100	30	No focal subject	2	254.371		STATE	555.104	557.180	2.076
RI13D_R9_99_I1K_08_03_2016_15_40_19_174	2019-08-14 21:24:00	E:/Aggression Videos/Bailey1/RI13D_R9_99_I1K_08_03_2016_15_40_19_174/RI13D_R9_99_I1K_08_03_2016_15_40_19_174_0.avi	1080.100	30	No focal subject	3	266.48		STATE	567.213	569.238	2.025
RI13D_R9_99_I1K_08_03_2016_15_40_19_174	2019-08-14 21:24:00	E:/Aggression Videos/Bailey1/RI13D_R9_99_I1K_08_03_2016_15_40_19_174/RI13D_R9_99_I1K_08_03_2016_15_40_19_174_0.avi	1080.100	30	No focal subject	2	266.498		STATE	567.231	568.080	0.849
RI13D_R9_99_I1K_08_03_2016_15_40_19_174	2019-08-14 21:24:00	E:/Aggression Videos/Bailey1/RI13D_R9_99_I1K_08_03_2016_15_40_19_174/RI13D_R9_99_I1K_08_03_2016_15_40_19_174_0.avi	1080.100	30	No focal subject	7	269.33		STATE	570.063	574.764	4.701
RI13D_R9_99_I1K_08_03_2016_15_40_19_174	2019-08-14 21:24:00	E:/Aggression Videos/Bailey1/RI13D_R9_99_I1K_08_03_2016_15_40_19_174/RI13D_R9_99_I1K_08_03_2016_15_40_19_174_0.avi	1080.100	30	No focal subject	6	284.189		STATE	584.922	591.705	6.783
RI13D_R9_99_I1K_08_03_2016_15_40_19_174	2019-08-14 21:24:00	E:/Aggression Videos/Bailey1/RI13D_R9_99_I1K_08_03_2016_15_40_19_174/RI13D_R9_99_I1K_08_03_2016_15_40_19_174_0.avi	1080.100	30	No focal subject	5	292.759		STATE	593.492	594.716	1.224
RI13D_R9_99_I1K_08_03_2016_15_40_19_174	2019-08-14 21:24:00	E:/Aggression Videos/Bailey1/RI13D_R9_99_I1K_08_03_2016_15_40_19_174/RI13D_R9_99_I1K_08_03_2016_15_40_19_174_0.avi	1080.100	30	No focal subject	6	294.222		STATE	594.955	603.217	8.262
RI13D_R9_99_I1K_08_03_2016_15_40_19_174	2019-08-14 21:24:00	E:/Aggression Videos/Bailey1/RI13D_R9_99_I1K_08_03_2016_15_40_19_174/RI13D_R9_99_I1K_08_03_2016_15_40_19_174_0.avi	1080.100	30	No focal subject	8	299.634		STATE	600.367	659.633	59.266
RI13D_R9_99_I1K_08_03_2016_15_40_19_174	2019-08-14 21:24:00	E:/Aggression Videos/Bailey1/RI13D_R9_99_I1K_08_03_2016_15_40_19_174/RI13D_R9_99_I1K_08_03_2016_15_40_19_174_0.avi	1080.100	30	No focal subject	1	331.359		STATE	632.092	632.867	0.775
RI13D_R9_99_I1K_08_03_2016_15_40_19_174	2019-08-14 21:24:00	E:/Aggression Videos/Bailey1/RI13D_R9_99_I1K_08_03_2016_15_40_19_174/RI13D_R9_99_I1K_08_03_2016_15_40_19_174_0.avi	1080.100	30	No focal subject	2	336.08		STATE	636.813	638.363	1.550
RI13D_R9_99_I1K_08_03_2016_15_40_19_174	2019-08-14 21:24:00	E:/Aggression Videos/Bailey1/RI13D_R9_99_I1K_08_03_2016_15_40_19_174/RI13D_R9_99_I1K_08_03_2016_15_40_19_174_0.avi	1080.100	30	No focal subject	2	340.78		STATE	641.513	642.507	0.994
RI13D_R9_99_I1K_08_03_2016_15_40_19_174	2019-08-14 21:24:00	E:/Aggression Videos/Bailey1/RI13D_R9_99_I1K_08_03_2016_15_40_19_174/RI13D_R9_99_I1K_08_03_2016_15_40_19_174_0.avi	1080.100	30	No focal subject	2	346.197		STATE	646.930	651.780	4.850
RI13D_R9_99_I1K_08_03_2016_15_40_19_174	2019-08-14 21:24:00	E:/Aggression Videos/Bailey1/RI13D_R9_99_I1K_08_03_2016_15_40_19_174/RI13D_R9_99_I1K_08_03_2016_15_40_19_174_0.avi	1080.100	30	No focal subject	2	354.622		STATE	655.355	661.379	6.024
RI13D_R9_99_I1K_08_03_2016_15_40_19_174	2019-08-14 21:24:00	E:/Aggression Videos/Bailey1/RI13D_R9_99_I1K_08_03_2016_15_40_19_174/RI13D_R9_99_I1K_08_03_2016_15_40_19_174_0.avi	1080.100	30	No focal subject	2	363.65		STATE	664.383	668.484	4.101
RI13D_R9_99_I1K_08_03_2016_15_40_19_174	2019-08-14 21:24:00	E:/Aggression Videos/Bailey1/RI13D_R9_99_I1K_08_03_2016_15_40_19_174/RI13D_R9_99_I1K_08_03_2016_15_40_19_174_0.avi	1080.100	30	No focal subject	2	373.4		STATE	674.133	675.159	1.026
RI13D_R9_99_I1K_08_03_2016_15_40_19_174	2019-08-14 21:24:00	E:/Aggression Videos/Bailey1/RI13D_R9_99_I1K_08_03_2016_15_40_19_174/RI13D_R9_99_I1K_08_03_2016_15_40_19_174_0.avi	1080.100	30	No focal subject	6	374.256		STATE	674.989	690.592	15.603
RI13D_R9_99_I1K_08_03_2016_15_40_19_174	2019-08-14 21:24:00	E:/Aggression Videos/Bailey1/RI13D_R9_99_I1K_08_03_2016_15_40_19_174/RI13D_R9_99_I1K_08_03_2016_15_40_19_174_0.avi	1080.100	30	No focal subject	6	394.308		STATE	695.041	702.915	7.874
RI13D_R9_99_I1K_08_03_2016_15_40_19_174	2019-08-14 21:24:00	E:/Aggression Videos/Bailey1/RI13D_R9_99_I1K_08_03_2016_15_40_19_174/RI13D_R9_99_I1K_08_03_2016_15_40_19_174_0.avi	1080.100	30	No focal subject	8	419.8		STATE	720.533	779.833	59.300
RI13D_R9_99_I1K_08_03_2016_15_40_19_174	2019-08-14 21:24:00	E:/Aggression Videos/Bailey1/RI13D_R9_99_I1K_08_03_2016_15_40_19_174/RI13D_R9_99_I1K_08_03_2016_15_40_19_174_0.avi	1080.100	30	No focal subject	2	446.501		STATE	747.234	748.284	1.050
RI13D_R9_99_I1K_08_03_2016_15_40_19_174	2019-08-14 21:24:00	E:/Aggression Videos/Bailey1/RI13D_R9_99_I1K_08_03_2016_15_40_19_174/RI13D_R9_99_I1K_08_03_2016_15_40_19_174_0.avi	1080.100	30	No focal subject	2	456.301		STATE	757.034	760.959	3.925
RI13D_R9_99_I1K_08_03_2016_15_40_19_174	2019-08-14 21:24:00	E:/Aggression Videos/Bailey1/RI13D_R9_99_I1K_08_03_2016_15_40_19_174/RI13D_R9_99_I1K_08_03_2016_15_40_19_174_0.avi	1080.100	30	No focal subject	2	483.468		STATE	784.201	785.000	0.799
RI13D_R9_99_I1K_08_03_2016_15_40_19_174	2019-08-14 21:24:00	E:/Aggression Videos/Bailey1/RI13D_R9_99_I1K_08_03_2016_15_40_19_174/RI13D_R9_99_I1K_08_03_2016_15_40_19_174_0.avi	1080.100	30	No focal subject	2	490.192		STATE	790.925	791.201	0.276
RI13D_R9_99_I1K_08_03_2016_15_40_19_174	2019-08-14 21:24:00	E:/Aggression Videos/Bailey1/RI13D_R9_99_I1K_08_03_2016_15_40_19_174/RI13D_R9_99_I1K_08_03_2016_15_40_19_174_0.avi	1080.100	30	No focal subject	2	530.584		STATE	831.317	839.142	7.825
RI13D_R9_99_I1K_08_03_2016_15_40_19_174	2019-08-14 21:24:00	E:/Aggression Videos/Bailey1/RI13D_R9_99_I1K_08_03_2016_15_40_19_174/RI13D_R9_99_I1K_08_03_2016_15_40_19_174_0.avi	1080.100	30	No focal subject	8	539.834		STATE	840.567	899.867	59.300
RI13D_R9_99_I1K_08_03_2016_15_40_19_174	2019-08-14 21:24:00	E:/Aggression Videos/Bailey1/RI13D_R9_99_I1K_08_03_2016_15_40_19_174/RI13D_R9_99_I1K_08_03_2016_15_40_19_174_0.avi	1080.100	30	No focal subject	2	549.817		STATE	850.550	851.051	0.501
RI13D_R9_99_I1K_08_03_2016_15_40_19_174	2019-08-14 21:24:00	E:/Aggression Videos/Bailey1/RI13D_R9_99_I1K_08_03_2016_15_40_19_174/RI13D_R9_99_I1K_08_03_2016_15_40_19_174_0.avi	1080.100	30	No focal subject	2	560.843		STATE	861.576	861.826	0.250
RI13D_R9_99_I1K_08_03_2016_15_40_19_174	2019-08-14 21:24:00	E:/Aggression Videos/Bailey1/RI13D_R9_99_I1K_08_03_2016_15_40_19_174/RI13D_R9_99_I1K_08_03_2016_15_40_19_174_0.avi	1080.100	30	No focal subject	2	562.917		STATE	863.650	869.026	5.376
RI13D_R9_99_I1K_08_03_2016_15_40_19_174	2019-08-14 21:24:00	E:/Aggression Videos/Bailey1/RI13D_R9_99_I1K_08_03_2016_15_40_19_174/RI13D_R9_99_I1K_08_03_2016_15_40_19_174_0.avi	1080.100	30	No focal subject	2	576.642		STATE	877.375	888.600	11.225
RI13D_R9_99_I1K_08_03_2016_15_40_19_174	2019-08-14 21:24:00	E:/Aggression Videos/Bailey1/RI13D_R9_99_I1K_08_03_2016_15_40_19_174/RI13D_R9_99_I1K_08_03_2016_15_40_19_174_0.avi	1080.100	30	No focal subject	2	594.402		STATE	895.135	896.208	1.073
RI13D_R9_99_I1K_08_03_2016_15_40_19_174	2019-08-14 21:24:00	E:/Aggression Videos/Bailey1/RI13D_R9_99_I1K_08_03_2016_15_40_19_174/RI13D_R9_99_I1K_08_03_2016_15_40_19_174_0.avi	1080.100	30	No focal subject	2	598.801		STATE	899.534	900.583	1.049
RI13D_R9_99_I1K_08_03_2016_15_40_19_174	2019-08-14 21:24:00	E:/Aggression Videos/Bailey1/RI13D_R9_99_I1K_08_03_2016_15_40_19_174/RI13D_R9_99_I1K_08_03_2016_15_40_19_174_0.avi	1080.100	30	No focal subject	2	608.918		STATE	909.651	910.175	0.524
RI13D_R9_99_I1K_08_03_2016_15_40_19_174	2019-08-14 21:24:00	E:/Aggression Videos/Bailey1/RI13D_R9_99_I1K_08_03_2016_15_40_19_174/RI13D_R9_99_I1K_08_03_2016_15_40_19_174_0.avi	1080.100	30	No focal subject	2	610.717		STATE	911.450	913.251	1.801
RI13D_R9_99_I1K_08_03_2016_15_40_19_174	2019-08-14 21:24:00	E:/Aggression Videos/Bailey1/RI13D_R9_99_I1K_08_03_2016_15_40_19_174/RI13D_R9_99_I1K_08_03_2016_15_40_19_174_0.avi	1080.100	30	No focal subject	2	618.218		STATE	918.951	919.226	0.275
RI13D_R9_99_I1K_08_03_2016_15_40_19_174	2019-08-14 21:24:00	E:/Aggression Videos/Bailey1/RI13D_R9_99_I1K_08_03_2016_15_40_19_174/RI13D_R9_99_I1K_08_03_2016_15_40_19_174_0.avi	1080.100	30	No focal subject	2	624.917		STATE	925.650	937.732	12.082
RI13D_R9_99_I1K_08_03_2016_15_40_19_174	2019-08-14 21:24:00	E:/Aggression Videos/Bailey1/RI13D_R9_99_I1K_08_03_2016_15_40_19_174/RI13D_R9_99_I1K_08_03_2016_15_40_19_174_0.avi	1080.100	30	No focal subject	2	659.369		STATE	960.102	966.677	6.575
RI13D_R9_99_I1K_08_03_2016_15_40_19_174	2019-08-14 21:24:00	E:/Aggression Videos/Bailey1/RI13D_R9_99_I1K_08_03_2016_15_40_19_174/RI13D_R9_99_I1K_08_03_2016_15_40_19_174_0.avi	1080.100	30	No focal subject	1	674.11		STATE	974.843	980.792	5.949
RI13D_R9_99_I1K_08_03_2016_15_40_19_174	2019-08-14 21:24:00	E:/Aggression Videos/Bailey1/RI13D_R9_99_I1K_08_03_2016_15_40_19_174/RI13D_R9_99_I1K_08_03_2016_15_40_19_174_0.avi	1080.100	30	No focal subject	2	680.809		STATE	981.542	982.077	0.535
RI13D_R9_99_I1K_08_03_2016_15_40_19_174	2019-08-14 21:24:00	E:/Aggression Videos/Bailey1/RI13D_R9_99_I1K_08_03_2016_15_40_19_174/RI13D_R9_99_I1K_08_03_2016_15_40_19_174_0.avi	1080.100	30	No focal subject	1	681.084		STATE	981.817	983.117	1.300
RI13D_R9_99_I1K_08_03_2016_15_40_19_174	2019-08-14 21:24:00	E:/Aggression Videos/Bailey1/RI13D_R9_99_I1K_08_03_2016_15_40_19_174/RI13D_R9_99_I1K_08_03_2016_15_40_19_174_0.avi	1080.100	30	No focal subject	2	694.393		STATE	995.126	1006.085	10.959
RI13D_R9_99_I1K_08_03_2016_15_40_19_174	2019-08-14 21:24:00	E:/Aggression Videos/Bailey1/RI13D_R9_99_I1K_08_03_2016_15_40_19_174/RI13D_R9_99_I1K_08_03_2016_15_40_19_174_0.avi	1080.100	30	No focal subject	2	712.844		STATE	1013.577	1015.402	1.825
RI13D_R9_99_I1K_08_03_2016_15_40_19_174	2019-08-14 21:24:00	E:/Aggression Videos/Bailey1/RI13D_R9_99_I1K_08_03_2016_15_40_19_174/RI13D_R9_99_I1K_08_03_2016_15_40_19_174_0.avi	1080.100	30	No focal subject	2	720.594		STATE	1021.327	1022.126	0.799
RI13D_R9_99_I1K_08_03_2016_15_40_19_174	2019-08-14 21:24:00	E:/Aggression Videos/Bailey1/RI13D_R9_99_I1K_08_03_2016_15_40_19_174/RI13D_R9_99_I1K_08_03_2016_15_40_19_174_0.avi	1080.100	30	No focal subject	1	733.419		STATE	1034.152	1035.776	1.624
RI13D_R9_99_I1K_08_03_2016_15_40_19_174	2019-08-14 21:24:00	E:/Aggression Videos/Bailey1/RI13D_R9_99_I1K_08_03_2016_15_40_19_174/RI13D_R9_99_I1K_08_03_2016_15_40_19_174_0.avi	1080.100	30	No focal subject	2	737.802		STATE	1038.535	1040.359	1.824
RI13D_R9_99_I1K_08_03_2016_15_40_19_174	2019-08-14 21:24:00	E:/Aggression Videos/Bailey1/RI13D_R9_99_I1K_08_03_2016_15_40_19_174/RI13D_R9_99_I1K_08_03_2016_15_40_19_174_0.avi	1080.100	30	No focal subject	1	743.444		STATE	1044.177	1045.202	1.025
RI13D_R9_99_I1K_08_03_2016_15_40_19_174	2019-08-14 21:24:00	E:/Aggression Videos/Bailey1/RI13D_R9_99_I1K_08_03_2016_15_40_19_174/RI13D_R9_99_I1K_08_03_2016_15_40_19_174_0.avi	1080.100	30	No focal subject	2	770.077		STATE	1070.810	1076.260	5.450
RI13D_R9_99_I1K_08_03_2016_15_40_19_174	2019-08-14 21:24:00	E:/Aggression Videos/Bailey1/RI13D_R9_99_I1K_08_03_2016_15_40_19_174/RI13D_R9_99_I1K_08_03_2016_15_40_19_174_0.avi	1080.100	30	No focal subject	1	775.843		STATE	1076.576	1077.526	0.950
RI13D_R9_99_I1K_08_03_2016_15_40_19_174	2019-08-14 21:24:00	E:/Aggression Videos/Bailey1/RI13D_R9_99_I1K_08_03_2016_15_40_19_174/RI13D_R9_99_I1K_08_03_2016_15_40_19_174_0.avi	1080.100	30	No focal subject	2	778.742		STATE	1079.475	1079.817	0.342

## Sheet: 14D
Observation id	Observation date	Media file	Total length	FPS	Subject	Behavior	Behavioral category	Modifiers	Behavior type	Start (s)	Stop (s)	Duration (s)	Comment start	Comment stop
RI14D_R9_100_I3K_08_05_2016_15_40_19_174	2019-08-15 22:14:31	E:/Aggression Videos/Bailey1/RI14D_R9_100_I3K_08_05_2016_15_40_19_174_0.avi	1067.030	30.0	No focal subject	0	0.742		POINT	300.509	300.509	NA
RI14D_R9_100_I3K_08_05_2016_15_40_19_174	2019-08-15 22:14:31	E:/Aggression Videos/Bailey1/RI14D_R9_100_I3K_08_05_2016_15_40_19_174_0.avi	1067.030	30.0	No focal subject	2	9.451		STATE	309.218	322.418	13.200
RI14D_R9_100_I3K_08_05_2016_15_40_19_174	2019-08-15 22:14:31	E:/Aggression Videos/Bailey1/RI14D_R9_100_I3K_08_05_2016_15_40_19_174_0.avi	1067.030	30.0	No focal subject	2	41.451		STATE	341.218	350.842	9.624
RI14D_R9_100_I3K_08_05_2016_15_40_19_174	2019-08-15 22:14:31	E:/Aggression Videos/Bailey1/RI14D_R9_100_I3K_08_05_2016_15_40_19_174_0.avi	1067.030	30.0	No focal subject	1	56.676		STATE	356.443	358.468	2.025
RI14D_R9_100_I3K_08_05_2016_15_40_19_174	2019-08-15 22:14:31	E:/Aggression Videos/Bailey1/RI14D_R9_100_I3K_08_05_2016_15_40_19_174_0.avi	1067.030	30.0	No focal subject	8	60		STATE	359.767	419.300	59.533
RI14D_R9_100_I3K_08_05_2016_15_40_19_174	2019-08-15 22:14:31	E:/Aggression Videos/Bailey1/RI14D_R9_100_I3K_08_05_2016_15_40_19_174_0.avi	1067.030	30.0	No focal subject	2	85.691		STATE	385.458	386.359	0.901
RI14D_R9_100_I3K_08_05_2016_15_40_19_174	2019-08-15 22:14:31	E:/Aggression Videos/Bailey1/RI14D_R9_100_I3K_08_05_2016_15_40_19_174_0.avi	1067.030	30.0	No focal subject	2	101.034		STATE	400.801	415.925	15.124
RI14D_R9_100_I3K_08_05_2016_15_40_19_174	2019-08-15 22:14:31	E:/Aggression Videos/Bailey1/RI14D_R9_100_I3K_08_05_2016_15_40_19_174_0.avi	1067.030	30.0	No focal subject	2	150.885		STATE	450.652	452.976	2.324
RI14D_R9_100_I3K_08_05_2016_15_40_19_174	2019-08-15 22:14:31	E:/Aggression Videos/Bailey1/RI14D_R9_100_I3K_08_05_2016_15_40_19_174_0.avi	1067.030	30.0	No focal subject	2	161.658		STATE	461.425	467.813	6.388
RI14D_R9_100_I3K_08_05_2016_15_40_19_174	2019-08-15 22:14:31	E:/Aggression Videos/Bailey1/RI14D_R9_100_I3K_08_05_2016_15_40_19_174_0.avi	1067.030	30.0	No focal subject	8	179.866		STATE	479.633	538.900	59.267
RI14D_R9_100_I3K_08_05_2016_15_40_19_174	2019-08-15 22:14:31	E:/Aggression Videos/Bailey1/RI14D_R9_100_I3K_08_05_2016_15_40_19_174_0.avi	1067.030	30.0	No focal subject	2	189.292		STATE	489.059	490.784	1.725
RI14D_R9_100_I3K_08_05_2016_15_40_19_174	2019-08-15 22:14:31	E:/Aggression Videos/Bailey1/RI14D_R9_100_I3K_08_05_2016_15_40_19_174_0.avi	1067.030	30.0	No focal subject	2	209.711		STATE	509.478	515.728	6.250
RI14D_R9_100_I3K_08_05_2016_15_40_19_174	2019-08-15 22:14:31	E:/Aggression Videos/Bailey1/RI14D_R9_100_I3K_08_05_2016_15_40_19_174_0.avi	1067.030	30.0	No focal subject	2	227.386		STATE	527.153	530.504	3.351
RI14D_R9_100_I3K_08_05_2016_15_40_19_174	2019-08-15 22:14:31	E:/Aggression Videos/Bailey1/RI14D_R9_100_I3K_08_05_2016_15_40_19_174_0.avi	1067.030	30.0	No focal subject	2	235.303		STATE	535.070	539.020	3.950
RI14D_R9_100_I3K_08_05_2016_15_40_19_174	2019-08-15 22:14:31	E:/Aggression Videos/Bailey1/RI14D_R9_100_I3K_08_05_2016_15_40_19_174_0.avi	1067.030	30.0	No focal subject	2	252.551		STATE	552.318	556.026	3.708
RI14D_R9_100_I3K_08_05_2016_15_40_19_174	2019-08-15 22:14:31	E:/Aggression Videos/Bailey1/RI14D_R9_100_I3K_08_05_2016_15_40_19_174_0.avi	1067.030	30.0	No focal subject	2	268.761		STATE	568.528	571.376	2.848
RI14D_R9_100_I3K_08_05_2016_15_40_19_174	2019-08-15 22:14:31	E:/Aggression Videos/Bailey1/RI14D_R9_100_I3K_08_05_2016_15_40_19_174_0.avi	1067.030	30.0	No focal subject	2	274.734		STATE	574.501	575.991	1.490
RI14D_R9_100_I3K_08_05_2016_15_40_19_174	2019-08-15 22:14:31	E:/Aggression Videos/Bailey1/RI14D_R9_100_I3K_08_05_2016_15_40_19_174_0.avi	1067.030	30.0	No focal subject	6	276.675		STATE	576.442	582.097	5.655
RI14D_R9_100_I3K_08_05_2016_15_40_19_174	2019-08-15 22:14:31	E:/Aggression Videos/Bailey1/RI14D_R9_100_I3K_08_05_2016_15_40_19_174_0.avi	1067.030	30.0	No focal subject	4	282.33		STATE	582.097	585.619	3.522
RI14D_R9_100_I3K_08_05_2016_15_40_19_174	2019-08-15 22:14:31	E:/Aggression Videos/Bailey1/RI14D_R9_100_I3K_08_05_2016_15_40_19_174_0.avi	1067.030	30.0	No focal subject	6	285.852		STATE	585.619	589.543	3.924
RI14D_R9_100_I3K_08_05_2016_15_40_19_174	2019-08-15 22:14:31	E:/Aggression Videos/Bailey1/RI14D_R9_100_I3K_08_05_2016_15_40_19_174_0.avi	1067.030	30.0	No focal subject	8	300.1		STATE	599.867	659.267	59.400
RI14D_R9_100_I3K_08_05_2016_15_40_19_174	2019-08-15 22:14:31	E:/Aggression Videos/Bailey1/RI14D_R9_100_I3K_08_05_2016_15_40_19_174_0.avi	1067.030	30.0	No focal subject	2	302.817		STATE	602.584	607.935	5.351
RI14D_R9_100_I3K_08_05_2016_15_40_19_174	2019-08-15 22:14:31	E:/Aggression Videos/Bailey1/RI14D_R9_100_I3K_08_05_2016_15_40_19_174_0.avi	1067.030	30.0	No focal subject	2	319.533		STATE	619.300	620.701	1.401
RI14D_R9_100_I3K_08_05_2016_15_40_19_174	2019-08-15 22:14:31	E:/Aggression Videos/Bailey1/RI14D_R9_100_I3K_08_05_2016_15_40_19_174_0.avi	1067.030	30.0	No focal subject	4	323.625		STATE	623.392	624.493	1.101
RI14D_R9_100_I3K_08_05_2016_15_40_19_174	2019-08-15 22:14:31	E:/Aggression Videos/Bailey1/RI14D_R9_100_I3K_08_05_2016_15_40_19_174_0.avi	1067.030	30.0	No focal subject	6	339.8		STATE	639.567	652.126	12.559
RI14D_R9_100_I3K_08_05_2016_15_40_19_174	2019-08-15 22:14:31	E:/Aggression Videos/Bailey1/RI14D_R9_100_I3K_08_05_2016_15_40_19_174_0.avi	1067.030	30.0	No focal subject	6	382.66		STATE	682.427	689.185	6.758
RI14D_R9_100_I3K_08_05_2016_15_40_19_174	2019-08-15 22:14:31	E:/Aggression Videos/Bailey1/RI14D_R9_100_I3K_08_05_2016_15_40_19_174_0.avi	1067.030	30.0	No focal subject	7	389.418		STATE	689.185	693.316	4.131
RI14D_R9_100_I3K_08_05_2016_15_40_19_174	2019-08-15 22:14:31	E:/Aggression Videos/Bailey1/RI14D_R9_100_I3K_08_05_2016_15_40_19_174_0.avi	1067.030	30.0	No focal subject	4	393.868		STATE	693.635	704.935	11.300
RI14D_R9_100_I3K_08_05_2016_15_40_19_174	2019-08-15 22:14:31	E:/Aggression Videos/Bailey1/RI14D_R9_100_I3K_08_05_2016_15_40_19_174_0.avi	1067.030	30.0	No focal subject	6	393.868		STATE	693.635	694.658	1.023
RI14D_R9_100_I3K_08_05_2016_15_40_19_174	2019-08-15 22:14:31	E:/Aggression Videos/Bailey1/RI14D_R9_100_I3K_08_05_2016_15_40_19_174_0.avi	1067.030	30.0	No focal subject	7	394.891		STATE	694.658	704.408	9.750
RI14D_R9_100_I3K_08_05_2016_15_40_19_174	2019-08-15 22:14:31	E:/Aggression Videos/Bailey1/RI14D_R9_100_I3K_08_05_2016_15_40_19_174_0.avi	1067.030	30.0	No focal subject	6	405.168		STATE	704.935	709.501	4.566
RI14D_R9_100_I3K_08_05_2016_15_40_19_174	2019-08-15 22:14:31	E:/Aggression Videos/Bailey1/RI14D_R9_100_I3K_08_05_2016_15_40_19_174_0.avi	1067.030	30.0	No focal subject	6	410.473		STATE	710.240	711.409	1.169
RI14D_R9_100_I3K_08_05_2016_15_40_19_174	2019-08-15 22:14:31	E:/Aggression Videos/Bailey1/RI14D_R9_100_I3K_08_05_2016_15_40_19_174_0.avi	1067.030	30.0	No focal subject	7	411.642		STATE	711.409	712.651	1.242
RI14D_R9_100_I3K_08_05_2016_15_40_19_174	2019-08-15 22:14:31	E:/Aggression Videos/Bailey1/RI14D_R9_100_I3K_08_05_2016_15_40_19_174_0.avi	1067.030	30.0	No focal subject	4	415.838		STATE	715.605	719.052	3.447
RI14D_R9_100_I3K_08_05_2016_15_40_19_174	2019-08-15 22:14:31	E:/Aggression Videos/Bailey1/RI14D_R9_100_I3K_08_05_2016_15_40_19_174_0.avi	1067.030	30.0	No focal subject	8	420.2		STATE	719.967	779.233	59.266
RI14D_R9_100_I3K_08_05_2016_15_40_19_174	2019-08-15 22:14:31	E:/Aggression Videos/Bailey1/RI14D_R9_100_I3K_08_05_2016_15_40_19_174_0.avi	1067.030	30.0	No focal subject	7	421.034		STATE	720.801	722.150	1.349
RI14D_R9_100_I3K_08_05_2016_15_40_19_174	2019-08-15 22:14:31	E:/Aggression Videos/Bailey1/RI14D_R9_100_I3K_08_05_2016_15_40_19_174_0.avi	1067.030	30.0	No focal subject	4	423.742		STATE	723.509	729.232	5.723
RI14D_R9_100_I3K_08_05_2016_15_40_19_174	2019-08-15 22:14:31	E:/Aggression Videos/Bailey1/RI14D_R9_100_I3K_08_05_2016_15_40_19_174_0.avi	1067.030	30.0	No focal subject	1	430.184		STATE	729.951	731.176	1.225
RI14D_R9_100_I3K_08_05_2016_15_40_19_174	2019-08-15 22:14:31	E:/Aggression Videos/Bailey1/RI14D_R9_100_I3K_08_05_2016_15_40_19_174_0.avi	1067.030	30.0	No focal subject	4	440.404		STATE	740.171	747.818	7.647
RI14D_R9_100_I3K_08_05_2016_15_40_19_174	2019-08-15 22:14:31	E:/Aggression Videos/Bailey1/RI14D_R9_100_I3K_08_05_2016_15_40_19_174_0.avi	1067.030	30.0	No focal subject	2	457.229		STATE	756.996	760.848	3.852
RI14D_R9_100_I3K_08_05_2016_15_40_19_174	2019-08-15 22:14:31	E:/Aggression Videos/Bailey1/RI14D_R9_100_I3K_08_05_2016_15_40_19_174_0.avi	1067.030	30.0	No focal subject	1	464.33		STATE	764.097	765.448	1.351
RI14D_R9_100_I3K_08_05_2016_15_40_19_174	2019-08-15 22:14:31	E:/Aggression Videos/Bailey1/RI14D_R9_100_I3K_08_05_2016_15_40_19_174_0.avi	1067.030	30.0	No focal subject	1	469.097		STATE	768.864	770.153	1.289
RI14D_R9_100_I3K_08_05_2016_15_40_19_174	2019-08-15 22:14:31	E:/Aggression Videos/Bailey1/RI14D_R9_100_I3K_08_05_2016_15_40_19_174_0.avi	1067.030	30.0	No focal subject	1	472.745		STATE	772.512	774.862	2.350
RI14D_R9_100_I3K_08_05_2016_15_40_19_174	2019-08-15 22:14:31	E:/Aggression Videos/Bailey1/RI14D_R9_100_I3K_08_05_2016_15_40_19_174_0.avi	1067.030	30.0	No focal subject	2	479.118		STATE	778.885	780.859	1.974
RI14D_R9_100_I3K_08_05_2016_15_40_19_174	2019-08-15 22:14:31	E:/Aggression Videos/Bailey1/RI14D_R9_100_I3K_08_05_2016_15_40_19_174_0.avi	1067.030	30.0	No focal subject	4	491.167		STATE	790.934	791.259	0.325
RI14D_R9_100_I3K_08_05_2016_15_40_19_174	2019-08-15 22:14:31	E:/Aggression Videos/Bailey1/RI14D_R9_100_I3K_08_05_2016_15_40_19_174_0.avi	1067.030	30.0	No focal subject	4	505.868		STATE	805.635	807.011	1.376
RI14D_R9_100_I3K_08_05_2016_15_40_19_174	2019-08-15 22:14:31	E:/Aggression Videos/Bailey1/RI14D_R9_100_I3K_08_05_2016_15_40_19_174_0.avi	1067.030	30.0	No focal subject	2	521.176		STATE	820.943	828.976	8.033
RI14D_R9_100_I3K_08_05_2016_15_40_19_174	2019-08-15 22:14:31	E:/Aggression Videos/Bailey1/RI14D_R9_100_I3K_08_05_2016_15_40_19_174_0.avi	1067.030	30.0	No focal subject	4	532.761		STATE	832.528	835.226	2.698
RI14D_R9_100_I3K_08_05_2016_15_40_19_174	2019-08-15 22:14:31	E:/Aggression Videos/Bailey1/RI14D_R9_100_I3K_08_05_2016_15_40_19_174_0.avi	1067.030	30.0	No focal subject	6	535.508		STATE	835.275	845.743	10.468
RI14D_R9_100_I3K_08_05_2016_15_40_19_174	2019-08-15 22:14:31	E:/Aggression Videos/Bailey1/RI14D_R9_100_I3K_08_05_2016_15_40_19_174_0.avi	1067.030	30.0	No focal subject	8	540.233		STATE	840.000	899.233	59.233
RI14D_R9_100_I3K_08_05_2016_15_40_19_174	2019-08-15 22:14:31	E:/Aggression Videos/Bailey1/RI14D_R9_100_I3K_08_05_2016_15_40_19_174_0.avi	1067.030	30.0	No focal subject	4	546.318		STATE	846.085	855.834	9.749
RI14D_R9_100_I3K_08_05_2016_15_40_19_174	2019-08-15 22:14:31	E:/Aggression Videos/Bailey1/RI14D_R9_100_I3K_08_05_2016_15_40_19_174_0.avi	1067.030	30.0	No focal subject	6	557.115		STATE	856.882	858.631	1.749
RI14D_R9_100_I3K_08_05_2016_15_40_19_174	2019-08-15 22:14:31	E:/Aggression Videos/Bailey1/RI14D_R9_100_I3K_08_05_2016_15_40_19_174_0.avi	1067.030	30.0	No focal subject	7	558.864		STATE	858.631	861.957	3.326
RI14D_R9_100_I3K_08_05_2016_15_40_19_174	2019-08-15 22:14:31	E:/Aggression Videos/Bailey1/RI14D_R9_100_I3K_08_05_2016_15_40_19_174_0.avi	1067.030	30.0	No focal subject	6	564.865		STATE	864.632	869.407	4.775
RI14D_R9_100_I3K_08_05_2016_15_40_19_174	2019-08-15 22:14:31	E:/Aggression Videos/Bailey1/RI14D_R9_100_I3K_08_05_2016_15_40_19_174_0.avi	1067.030	30.0	No focal subject	4	569.64		STATE	869.407	873.521	4.114
RI14D_R9_100_I3K_08_05_2016_15_40_19_174	2019-08-15 22:14:31	E:/Aggression Videos/Bailey1/RI14D_R9_100_I3K_08_05_2016_15_40_19_174_0.avi	1067.030	30.0	No focal subject	6	573.754		STATE	873.521	878.640	5.119
RI14D_R9_100_I3K_08_05_2016_15_40_19_174	2019-08-15 22:14:31	E:/Aggression Videos/Bailey1/RI14D_R9_100_I3K_08_05_2016_15_40_19_174_0.avi	1067.030	30.0	No focal subject	6	585.855		STATE	885.622	894.323	8.701
RI14D_R9_100_I3K_08_05_2016_15_40_19_174	2019-08-15 22:14:31	E:/Aggression Videos/Bailey1/RI14D_R9_100_I3K_08_05_2016_15_40_19_174_0.avi	1067.030	30.0	No focal subject	1	604.067		STATE	903.834	905.509	1.675
RI14D_R9_100_I3K_08_05_2016_15_40_19_174	2019-08-15 22:14:31	E:/Aggression Videos/Bailey1/RI14D_R9_100_I3K_08_05_2016_15_40_19_174_0.avi	1067.030	30.0	No focal subject	4	611.876		STATE	911.643	913.316	1.673
RI14D_R9_100_I3K_08_05_2016_15_40_19_174	2019-08-15 22:14:31	E:/Aggression Videos/Bailey1/RI14D_R9_100_I3K_08_05_2016_15_40_19_174_0.avi	1067.030	30.0	No focal subject	4	618.701		STATE	918.468	941.566	23.098
RI14D_R9_100_I3K_08_05_2016_15_40_19_174	2019-08-15 22:14:31	E:/Aggression Videos/Bailey1/RI14D_R9_100_I3K_08_05_2016_15_40_19_174_0.avi	1067.030	30.0	No focal subject	2	645.034		STATE	944.801	948.475	3.674
RI14D_R9_100_I3K_08_05_2016_15_40_19_174	2019-08-15 22:14:31	E:/Aggression Videos/Bailey1/RI14D_R9_100_I3K_08_05_2016_15_40_19_174_0.avi	1067.030	30.0	No focal subject	2	663.528		STATE	963.295	968.717	5.422
RI14D_R9_100_I3K_08_05_2016_15_40_19_174	2019-08-15 22:14:31	E:/Aggression Videos/Bailey1/RI14D_R9_100_I3K_08_05_2016_15_40_19_174_0.avi	1067.030	30.0	No focal subject	1	669.367		STATE	969.134	973.908	4.774
RI14D_R9_100_I3K_08_05_2016_15_40_19_174	2019-08-15 22:14:31	E:/Aggression Videos/Bailey1/RI14D_R9_100_I3K_08_05_2016_15_40_19_174_0.avi	1067.030	30.0	No focal subject	1	677.925		STATE	977.692	985.416	7.724
RI14D_R9_100_I3K_08_05_2016_15_40_19_174	2019-08-15 22:14:31	E:/Aggression Videos/Bailey1/RI14D_R9_100_I3K_08_05_2016_15_40_19_174_0.avi	1067.030	30.0	No focal subject	4	695.75		STATE	995.517	1001.016	5.499
RI14D_R9_100_I3K_08_05_2016_15_40_19_174	2019-08-15 22:14:31	E:/Aggression Videos/Bailey1/RI14D_R9_100_I3K_08_05_2016_15_40_19_174_0.avi	1067.030	30.0	No focal subject	7	701.584		STATE	1001.351	1006.792	5.441
RI14D_R9_100_I3K_08_05_2016_15_40_19_174	2019-08-15 22:14:31	E:/Aggression Videos/Bailey1/RI14D_R9_100_I3K_08_05_2016_15_40_19_174_0.avi	1067.030	30.0	No focal subject	6	710.499		STATE	1010.266	1015.283	5.017
RI14D_R9_100_I3K_08_05_2016_15_40_19_174	2019-08-15 22:14:31	E:/Aggression Videos/Bailey1/RI14D_R9_100_I3K_08_05_2016_15_40_19_174_0.avi	1067.030	30.0	No focal subject	4	715.516		STATE	1015.283	1019.558	4.275
RI14D_R9_100_I3K_08_05_2016_15_40_19_174	2019-08-15 22:14:31	E:/Aggression Videos/Bailey1/RI14D_R9_100_I3K_08_05_2016_15_40_19_174_0.avi	1067.030	30.0	No focal subject	1	723.859		STATE	1023.626	1025.551	1.925
RI14D_R9_100_I3K_08_05_2016_15_40_19_174	2019-08-15 22:14:31	E:/Aggression Videos/Bailey1/RI14D_R9_100_I3K_08_05_2016_15_40_19_174_0.avi	1067.030	30.0	No focal subject	2	729.382		STATE	1029.149	1033.400	4.251
RI14D_R9_100_I3K_08_05_2016_15_40_19_174	2019-08-15 22:14:31	E:/Aggression Videos/Bailey1/RI14D_R9_100_I3K_08_05_2016_15_40_19_174_0.avi	1067.030	30.0	No focal subject	1	739.674		STATE	1039.441	1040.991	1.550
RI14D_R9_100_I3K_08_05_2016_15_40_19_174	2019-08-15 22:14:31	E:/Aggression Videos/Bailey1/RI14D_R9_100_I3K_08_05_2016_15_40_19_174_0.avi	1067.030	30.0	No focal subject	1	743.947		STATE	1043.714	1044.839	1.125
RI14D_R9_100_I3K_08_05_2016_15_40_19_174	2019-08-15 22:14:31	E:/Aggression Videos/Bailey1/RI14D_R9_100_I3K_08_05_2016_15_40_19_174_0.avi	1067.030	30.0	No focal subject	2	755.647		STATE	1055.414	1060.591	5.177
RI14D_R9_100_I3K_08_05_2016_15_40_19_174	2019-08-15 22:14:31	E:/Aggression Videos/Bailey1/RI14D_R9_100_I3K_08_05_2016_15_40_19_174_0.avi	1067.030	30.0	No focal subject	6	760.824		STATE	1060.591	1065.392	4.801
RI14D_R9_100_I3K_08_05_2016_15_40_19_174	2019-08-15 22:14:31	E:/Aggression Videos/Bailey1/RI14D_R9_100_I3K_08_05_2016_15_40_19_174_0.avi	1067.030	30.0	No focal subject	7	765.625		STATE	1065.392	1066.741	1.349
						12

## Sheet: 15B
Observation id	Observation date	Media file	Total length	FPS	Subject	Behavior	Behavioral category	Modifiers	Behavior type	Start (s)	Stop (s)	Duration (s)	Comment start	Comment stop
RI15B_R9_101_I5J_07_12_2016_15_40_19_174	2019-08-17 21:23:23	E:/Aggression Videos/Bailey1/RI15B_R9_101_I5J_07_12_2016_15_40_19_174_0.avi	1082.800	30.0	No focal subject	0	0.001		POINT	300.884	300.884	NA
RI15B_R9_101_I5J_07_12_2016_15_40_19_174	2019-08-17 21:23:23	E:/Aggression Videos/Bailey1/RI15B_R9_101_I5J_07_12_2016_15_40_19_174_0.avi	1082.800	30.0	No focal subject	2	5.242		STATE	306.125	334.599	28.474
RI15B_R9_101_I5J_07_12_2016_15_40_19_174	2019-08-17 21:23:23	E:/Aggression Videos/Bailey1/RI15B_R9_101_I5J_07_12_2016_15_40_19_174_0.avi	1082.800	30.0	No focal subject	2	35.292		STATE	336.175	341.475	5.300
RI15B_R9_101_I5J_07_12_2016_15_40_19_174	2019-08-17 21:23:23	E:/Aggression Videos/Bailey1/RI15B_R9_101_I5J_07_12_2016_15_40_19_174_0.avi	1082.800	30.0	No focal subject	2	48.642		STATE	349.525	355.050	5.525
RI15B_R9_101_I5J_07_12_2016_15_40_19_174	2019-08-17 21:23:23	E:/Aggression Videos/Bailey1/RI15B_R9_101_I5J_07_12_2016_15_40_19_174_0.avi	1082.800	30.0	No focal subject	2	57.883		STATE	358.766	360.609	1.843
RI15B_R9_101_I5J_07_12_2016_15_40_19_174	2019-08-17 21:23:23	E:/Aggression Videos/Bailey1/RI15B_R9_101_I5J_07_12_2016_15_40_19_174_0.avi	1082.800	30.0	No focal subject	7	60		STATE	360.883	364.116	3.233
RI15B_R9_101_I5J_07_12_2016_15_40_19_174	2019-08-17 21:23:23	E:/Aggression Videos/Bailey1/RI15B_R9_101_I5J_07_12_2016_15_40_19_174_0.avi	1082.800	30.0	No focal subject	8	60.784		STATE	361.667	421.033	59.366
RI15B_R9_101_I5J_07_12_2016_15_40_19_174	2019-08-17 21:23:23	E:/Aggression Videos/Bailey1/RI15B_R9_101_I5J_07_12_2016_15_40_19_174_0.avi	1082.800	30.0	No focal subject	2	63.734		STATE	364.617	367.441	2.824
RI15B_R9_101_I5J_07_12_2016_15_40_19_174	2019-08-17 21:23:23	E:/Aggression Videos/Bailey1/RI15B_R9_101_I5J_07_12_2016_15_40_19_174_0.avi	1082.800	30.0	No focal subject	6	73.283		STATE	374.166	379.399	5.233
RI15B_R9_101_I5J_07_12_2016_15_40_19_174	2019-08-17 21:23:23	E:/Aggression Videos/Bailey1/RI15B_R9_101_I5J_07_12_2016_15_40_19_174_0.avi	1082.800	30.0	No focal subject	2	79.767		STATE	380.650	381.730	1.080
RI15B_R9_101_I5J_07_12_2016_15_40_19_174	2019-08-17 21:23:23	E:/Aggression Videos/Bailey1/RI15B_R9_101_I5J_07_12_2016_15_40_19_174_0.avi	1082.800	30.0	No focal subject	6	87.392		STATE	388.275	390.350	2.075
RI15B_R9_101_I5J_07_12_2016_15_40_19_174	2019-08-17 21:23:23	E:/Aggression Videos/Bailey1/RI15B_R9_101_I5J_07_12_2016_15_40_19_174_0.avi	1082.800	30.0	No focal subject	4	89.467		STATE	390.350	398.149	7.799
RI15B_R9_101_I5J_07_12_2016_15_40_19_174	2019-08-17 21:23:23	E:/Aggression Videos/Bailey1/RI15B_R9_101_I5J_07_12_2016_15_40_19_174_0.avi	1082.800	30.0	No focal subject	4	117.043		STATE	417.926	421.626	3.700
RI15B_R9_101_I5J_07_12_2016_15_40_19_174	2019-08-17 21:23:23	E:/Aggression Videos/Bailey1/RI15B_R9_101_I5J_07_12_2016_15_40_19_174_0.avi	1082.800	30.0	No focal subject	2	128.292		STATE	429.175	454.375	25.200
RI15B_R9_101_I5J_07_12_2016_15_40_19_174	2019-08-17 21:23:23	E:/Aggression Videos/Bailey1/RI15B_R9_101_I5J_07_12_2016_15_40_19_174_0.avi	1082.800	30.0	No focal subject	2	158.968		STATE	459.851	476.751	16.900
RI15B_R9_101_I5J_07_12_2016_15_40_19_174	2019-08-17 21:23:23	E:/Aggression Videos/Bailey1/RI15B_R9_101_I5J_07_12_2016_15_40_19_174_0.avi	1082.800	30.0	No focal subject	8	179.617		STATE	480.500	540.067	59.567
RI15B_R9_101_I5J_07_12_2016_15_40_19_174	2019-08-17 21:23:23	E:/Aggression Videos/Bailey1/RI15B_R9_101_I5J_07_12_2016_15_40_19_174_0.avi	1082.800	30.0	No focal subject	2	192.918		STATE	493.801	497.875	4.074
RI15B_R9_101_I5J_07_12_2016_15_40_19_174	2019-08-17 21:23:23	E:/Aggression Videos/Bailey1/RI15B_R9_101_I5J_07_12_2016_15_40_19_174_0.avi	1082.800	30.0	No focal subject	2	216.517		STATE	517.400	523.024	5.624
RI15B_R9_101_I5J_07_12_2016_15_40_19_174	2019-08-17 21:23:23	E:/Aggression Videos/Bailey1/RI15B_R9_101_I5J_07_12_2016_15_40_19_174_0.avi	1082.800	30.0	No focal subject	1	225.785		STATE	526.668	527.168	0.500
RI15B_R9_101_I5J_07_12_2016_15_40_19_174	2019-08-17 21:23:23	E:/Aggression Videos/Bailey1/RI15B_R9_101_I5J_07_12_2016_15_40_19_174_0.avi	1082.800	30.0	No focal subject	1	230.276		STATE	531.159	533.209	2.050
RI15B_R9_101_I5J_07_12_2016_15_40_19_174	2019-08-17 21:23:23	E:/Aggression Videos/Bailey1/RI15B_R9_101_I5J_07_12_2016_15_40_19_174_0.avi	1082.800	30.0	No focal subject	2	235.176		STATE	536.059	536.333	0.274
RI15B_R9_101_I5J_07_12_2016_15_40_19_174	2019-08-17 21:23:23	E:/Aggression Videos/Bailey1/RI15B_R9_101_I5J_07_12_2016_15_40_19_174_0.avi	1082.800	30.0	No focal subject	2	238.825		STATE	539.708	540.459	0.751
RI15B_R9_101_I5J_07_12_2016_15_40_19_174	2019-08-17 21:23:23	E:/Aggression Videos/Bailey1/RI15B_R9_101_I5J_07_12_2016_15_40_19_174_0.avi	1082.800	30.0	No focal subject	2	242.342		STATE	543.225	546.926	3.701
RI15B_R9_101_I5J_07_12_2016_15_40_19_174	2019-08-17 21:23:23	E:/Aggression Videos/Bailey1/RI15B_R9_101_I5J_07_12_2016_15_40_19_174_0.avi	1082.800	30.0	No focal subject	2	253.457		STATE	554.340	560.040	5.700
RI15B_R9_101_I5J_07_12_2016_15_40_19_174	2019-08-17 21:23:23	E:/Aggression Videos/Bailey1/RI15B_R9_101_I5J_07_12_2016_15_40_19_174_0.avi	1082.800	30.0	No focal subject	1	263.608		STATE	564.491	565.791	1.300
RI15B_R9_101_I5J_07_12_2016_15_40_19_174	2019-08-17 21:23:23	E:/Aggression Videos/Bailey1/RI15B_R9_101_I5J_07_12_2016_15_40_19_174_0.avi	1082.800	30.0	No focal subject	5	283.709		STATE	584.592	586.918	2.326
RI15B_R9_101_I5J_07_12_2016_15_40_19_174	2019-08-17 21:23:23	E:/Aggression Videos/Bailey1/RI15B_R9_101_I5J_07_12_2016_15_40_19_174_0.avi	1082.800	30.0	No focal subject	6	286.61		STATE	587.493	593.959	6.466
RI15B_R9_101_I5J_07_12_2016_15_40_19_174	2019-08-17 21:23:23	E:/Aggression Videos/Bailey1/RI15B_R9_101_I5J_07_12_2016_15_40_19_174_0.avi	1082.800	30.0	No focal subject	8	299.684		STATE	600.567	660.100	59.533
RI15B_R9_101_I5J_07_12_2016_15_40_19_174	2019-08-17 21:23:23	E:/Aggression Videos/Bailey1/RI15B_R9_101_I5J_07_12_2016_15_40_19_174_0.avi	1082.800	30.0	No focal subject	2	355.093		STATE	655.976	658.226	2.250
RI15B_R9_101_I5J_07_12_2016_15_40_19_174	2019-08-17 21:23:23	E:/Aggression Videos/Bailey1/RI15B_R9_101_I5J_07_12_2016_15_40_19_174_0.avi	1082.800	30.0	No focal subject	6	358.217		STATE	659.100	662.809	3.709
RI15B_R9_101_I5J_07_12_2016_15_40_19_174	2019-08-17 21:23:23	E:/Aggression Videos/Bailey1/RI15B_R9_101_I5J_07_12_2016_15_40_19_174_0.avi	1082.800	30.0	No focal subject	8	419.55		STATE	720.433	779.900	59.467
RI15B_R9_101_I5J_07_12_2016_15_40_19_174	2019-08-17 21:23:23	E:/Aggression Videos/Bailey1/RI15B_R9_101_I5J_07_12_2016_15_40_19_174_0.avi	1082.800	30.0	No focal subject	2	452.233		STATE	753.116	753.692	0.576
RI15B_R9_101_I5J_07_12_2016_15_40_19_174	2019-08-17 21:23:23	E:/Aggression Videos/Bailey1/RI15B_R9_101_I5J_07_12_2016_15_40_19_174_0.avi	1082.800	30.0	No focal subject	2	490.3		STATE	791.183	791.933	0.750
RI15B_R9_101_I5J_07_12_2016_15_40_19_174	2019-08-17 21:23:23	E:/Aggression Videos/Bailey1/RI15B_R9_101_I5J_07_12_2016_15_40_19_174_0.avi	1082.800	30.0	No focal subject	2	516.3		STATE	817.183	818.183	1.000
RI15B_R9_101_I5J_07_12_2016_15_40_19_174	2019-08-17 21:23:23	E:/Aggression Videos/Bailey1/RI15B_R9_101_I5J_07_12_2016_15_40_19_174_0.avi	1082.800	30.0	No focal subject	2	539.784		STATE	840.667	841.718	1.051
RI15B_R9_101_I5J_07_12_2016_15_40_19_174	2019-08-17 21:23:23	E:/Aggression Videos/Bailey1/RI15B_R9_101_I5J_07_12_2016_15_40_19_174_0.avi	1082.800	30.0	No focal subject	8	539.784		STATE	840.667	900.000	59.333
RI15B_R9_101_I5J_07_12_2016_15_40_19_174	2019-08-17 21:23:23	E:/Aggression Videos/Bailey1/RI15B_R9_101_I5J_07_12_2016_15_40_19_174_0.avi	1082.800	30.0	No focal subject	1	607.823		STATE	908.706	910.078	1.372
RI15B_R9_101_I5J_07_12_2016_15_40_19_174	2019-08-17 21:23:23	E:/Aggression Videos/Bailey1/RI15B_R9_101_I5J_07_12_2016_15_40_19_174_0.avi	1082.800	30.0	No focal subject	2	628.834		STATE	929.717	930.217	0.500
RI15B_R9_101_I5J_07_12_2016_15_40_19_174	2019-08-17 21:23:23	E:/Aggression Videos/Bailey1/RI15B_R9_101_I5J_07_12_2016_15_40_19_174_0.avi	1082.800	30.0	No focal subject	2	632.659		STATE	933.542	934.042	0.500
RI15B_R9_101_I5J_07_12_2016_15_40_19_174	2019-08-17 21:23:23	E:/Aggression Videos/Bailey1/RI15B_R9_101_I5J_07_12_2016_15_40_19_174_0.avi	1082.800	30.0	No focal subject	2	651.061		STATE	951.944	952.567	0.623
RI15B_R9_101_I5J_07_12_2016_15_40_19_174	2019-08-17 21:23:23	E:/Aggression Videos/Bailey1/RI15B_R9_101_I5J_07_12_2016_15_40_19_174_0.avi	1082.800	30.0	No focal subject	2	658.217		STATE	959.100	959.926	0.826
RI15B_R9_101_I5J_07_12_2016_15_40_19_174	2019-08-17 21:23:23	E:/Aggression Videos/Bailey1/RI15B_R9_101_I5J_07_12_2016_15_40_19_174_0.avi	1082.800	30.0	No focal subject	1	681.334		STATE	982.217	1000.757	18.540
RI15B_R9_101_I5J_07_12_2016_15_40_19_174	2019-08-17 21:23:23	E:/Aggression Videos/Bailey1/RI15B_R9_101_I5J_07_12_2016_15_40_19_174_0.avi	1082.800	30.0	No focal subject	2	706.099		STATE	1006.982	1008.633	1.651
RI15B_R9_101_I5J_07_12_2016_15_40_19_174	2019-08-17 21:23:23	E:/Aggression Videos/Bailey1/RI15B_R9_101_I5J_07_12_2016_15_40_19_174_0.avi	1082.800	30.0	No focal subject	1	719.401		STATE	1020.284	1020.859	0.575
RI15B_R9_101_I5J_07_12_2016_15_40_19_174	2019-08-17 21:23:23	E:/Aggression Videos/Bailey1/RI15B_R9_101_I5J_07_12_2016_15_40_19_174_0.avi	1082.800	30.0	No focal subject	2	761.666		STATE	1062.549	1063.624	1.075
RI15B_R9_101_I5J_07_12_2016_15_40_19_174	2019-08-17 21:23:23	E:/Aggression Videos/Bailey1/RI15B_R9_101_I5J_07_12_2016_15_40_19_174_0.avi	1082.800	30.0	No focal subject	2	780.642		STATE	1081.525	1082.226	0.701

[truncated: 27 more sheets: 15C, 15D, 16A, 16B, 16D, 23A, 23B, 23C, 25A, 25B, 25C, 25D, 26A, 26C, 27A, 27B, 27C, 27D, 27E, 29A …]
