# Supplementary material for: Cerebellar Purkinje cell activity modulates aggressive behavior
Source: eLife. 2020 Apr 28;9:e53229. doi: 10.7554/eLife.53229 (PMC7202893; doi:10.7554/eLife.53229)
Supplement: Figure 3—figure supplement 3—source data 2. [file elife-53229-fig3-figsupp3-data2.xlsx]

## Sheet: Event Counts
	Assay	Attacks		Social			Attacks		Social
	Light	Off	On	Off	On		Off	On	Off	On
	35A	1	0	14	9		1.33333	2.33333	10.3333	8.66667
	35B	2	6	7	9
	35C	1	1	10	8
	36A	2	0	7	8		3	3	8	8.33333
	36B	7	4	6	3
	36C	0	5	11	14
	37A	7	2	15	13		3	2.66667	10.6667	9.33333
	37B	2	3	4	3
	42A	0	3	13	12		3	5	5.33333	7
	42B	2	6	3	5
	42C	7	6	0	4
	43A	7	7	3	2		6.5	6	2.25	1
	43B	8	3	2	2
	43C	9	8	1	0
	43D	2	6	3	0
	50A	3	3	10	7		4.33333	3	6.33333	6.33333
	50B	5	4	2	2
	50C	5	2	7	10
	Isa199A	1	4	15	12		2.5	2	12	12.5
	Isa199B	4	0	9	13
	AVG	3.75	3.65	7.1	6.8		3.38095	3.42857	7.84524	7.59524
	SEM	0.644307	0.53447	1.08069	1.03517		0.617978	0.562093	1.30329	1.32929
	TTEST	0.887183		0.614197			0.91322		0.60504

## Sheet: 35A
Observation id	Observation date	Media file	Total length	FPS	Subject	Behavior	Behavioral category	Modifiers	Behavior type	Start (s)	Stop (s)	Duration (s)	Comment start	Comment stop
RI35A_R9_171_I3Q_11_07_2016_15_40_19_174	2019-09-15 19:39:21	E:/Aggression Videos/Bailey1/RI35A_R9_171_I3Q_11_07_2016_15_40_19_174_0.avi	1088.400	30.0	No focal subject	0	-0.235		POINT	299.433	299.433	NA
RI35A_R9_171_I3Q_11_07_2016_15_40_19_174	2019-09-15 19:39:21	E:/Aggression Videos/Bailey1/RI35A_R9_171_I3Q_11_07_2016_15_40_19_174_0.avi	1088.400	30.0	No focal subject	2	4.189		STATE	303.857	309.151	5.294
RI35A_R9_171_I3Q_11_07_2016_15_40_19_174	2019-09-15 19:39:21	E:/Aggression Videos/Bailey1/RI35A_R9_171_I3Q_11_07_2016_15_40_19_174_0.avi	1088.400	30.0	No focal subject	2	11.858		STATE	311.526	313.100	1.574
RI35A_R9_171_I3Q_11_07_2016_15_40_19_174	2019-09-15 19:39:21	E:/Aggression Videos/Bailey1/RI35A_R9_171_I3Q_11_07_2016_15_40_19_174_0.avi	1088.400	30.0	No focal subject	2	15.732		STATE	315.400	317.951	2.551
RI35A_R9_171_I3Q_11_07_2016_15_40_19_174	2019-09-15 19:39:21	E:/Aggression Videos/Bailey1/RI35A_R9_171_I3Q_11_07_2016_15_40_19_174_0.avi	1088.400	30.0	No focal subject	2	20.333		STATE	320.001	330.951	10.950
RI35A_R9_171_I3Q_11_07_2016_15_40_19_174	2019-09-15 19:39:21	E:/Aggression Videos/Bailey1/RI35A_R9_171_I3Q_11_07_2016_15_40_19_174_0.avi	1088.400	30.0	No focal subject	2	36.958		STATE	336.626	341.251	4.625
RI35A_R9_171_I3Q_11_07_2016_15_40_19_174	2019-09-15 19:39:21	E:/Aggression Videos/Bailey1/RI35A_R9_171_I3Q_11_07_2016_15_40_19_174_0.avi	1088.400	30.0	No focal subject	2	43.732		STATE	343.400	412.693	69.293
RI35A_R9_171_I3Q_11_07_2016_15_40_19_174	2019-09-15 19:39:21	E:/Aggression Videos/Bailey1/RI35A_R9_171_I3Q_11_07_2016_15_40_19_174_0.avi	1088.400	30.0	No focal subject	8	60		STATE	359.668	419.193	59.525
RI35A_R9_171_I3Q_11_07_2016_15_40_19_174	2019-09-15 19:39:21	E:/Aggression Videos/Bailey1/RI35A_R9_171_I3Q_11_07_2016_15_40_19_174_0.avi	1088.400	30.0	No focal subject	2	116.4		STATE	416.068	418.918	2.850
RI35A_R9_171_I3Q_11_07_2016_15_40_19_174	2019-09-15 19:39:21	E:/Aggression Videos/Bailey1/RI35A_R9_171_I3Q_11_07_2016_15_40_19_174_0.avi	1088.400	30.0	No focal subject	2	124.674		STATE	424.342	445.643	21.301
RI35A_R9_171_I3Q_11_07_2016_15_40_19_174	2019-09-15 19:39:21	E:/Aggression Videos/Bailey1/RI35A_R9_171_I3Q_11_07_2016_15_40_19_174_0.avi	1088.400	30.0	No focal subject	2	149.275		STATE	448.943	465.293	16.350
RI35A_R9_171_I3Q_11_07_2016_15_40_19_174	2019-09-15 19:39:21	E:/Aggression Videos/Bailey1/RI35A_R9_171_I3Q_11_07_2016_15_40_19_174_0.avi	1088.400	30.0	No focal subject	2	173.875		STATE	473.543	495.276	21.733
RI35A_R9_171_I3Q_11_07_2016_15_40_19_174	2019-09-15 19:39:21	E:/Aggression Videos/Bailey1/RI35A_R9_171_I3Q_11_07_2016_15_40_19_174_0.avi	1088.400	30.0	No focal subject	8	180.032		STATE	479.700	539.033	59.333
RI35A_R9_171_I3Q_11_07_2016_15_40_19_174	2019-09-15 19:39:21	E:/Aggression Videos/Bailey1/RI35A_R9_171_I3Q_11_07_2016_15_40_19_174_0.avi	1088.400	30.0	No focal subject	2	198.182		STATE	497.850	511.026	13.176
RI35A_R9_171_I3Q_11_07_2016_15_40_19_174	2019-09-15 19:39:21	E:/Aggression Videos/Bailey1/RI35A_R9_171_I3Q_11_07_2016_15_40_19_174_0.avi	1088.400	30.0	No focal subject	2	231.008		STATE	530.676	548.876	18.200
RI35A_R9_171_I3Q_11_07_2016_15_40_19_174	2019-09-15 19:39:21	E:/Aggression Videos/Bailey1/RI35A_R9_171_I3Q_11_07_2016_15_40_19_174_0.avi	1088.400	30.0	No focal subject	2	251.532		STATE	551.200	562.200	11.000
RI35A_R9_171_I3Q_11_07_2016_15_40_19_174	2019-09-15 19:39:21	E:/Aggression Videos/Bailey1/RI35A_R9_171_I3Q_11_07_2016_15_40_19_174_0.avi	1088.400	30.0	No focal subject	2	264.381		STATE	564.049	573.374	9.325
RI35A_R9_171_I3Q_11_07_2016_15_40_19_174	2019-09-15 19:39:21	E:/Aggression Videos/Bailey1/RI35A_R9_171_I3Q_11_07_2016_15_40_19_174_0.avi	1088.400	30.0	No focal subject	2	284.332		STATE	584.000	607.608	23.608
RI35A_R9_171_I3Q_11_07_2016_15_40_19_174	2019-09-15 19:39:21	E:/Aggression Videos/Bailey1/RI35A_R9_171_I3Q_11_07_2016_15_40_19_174_0.avi	1088.400	30.0	No focal subject	8	300.375		STATE	600.043	659.150	59.107
RI35A_R9_171_I3Q_11_07_2016_15_40_19_174	2019-09-15 19:39:21	E:/Aggression Videos/Bailey1/RI35A_R9_171_I3Q_11_07_2016_15_40_19_174_0.avi	1088.400	30.0	No focal subject	1	307.956		STATE	607.624	609.176	1.552
RI35A_R9_171_I3Q_11_07_2016_15_40_19_174	2019-09-15 19:39:21	E:/Aggression Videos/Bailey1/RI35A_R9_171_I3Q_11_07_2016_15_40_19_174_0.avi	1088.400	30.0	No focal subject	2	325.716		STATE	625.384	626.433	1.049
RI35A_R9_171_I3Q_11_07_2016_15_40_19_174	2019-09-15 19:39:21	E:/Aggression Videos/Bailey1/RI35A_R9_171_I3Q_11_07_2016_15_40_19_174_0.avi	1088.400	30.0	No focal subject	2	357.566		STATE	657.234	659.533	2.299
RI35A_R9_171_I3Q_11_07_2016_15_40_19_174	2019-09-15 19:39:21	E:/Aggression Videos/Bailey1/RI35A_R9_171_I3Q_11_07_2016_15_40_19_174_0.avi	1088.400	30.0	No focal subject	2	372.282		STATE	671.950	677.401	5.451
RI35A_R9_171_I3Q_11_07_2016_15_40_19_174	2019-09-15 19:39:21	E:/Aggression Videos/Bailey1/RI35A_R9_171_I3Q_11_07_2016_15_40_19_174_0.avi	1088.400	30.0	No focal subject	6	379.582		STATE	679.250	696.301	17.051
RI35A_R9_171_I3Q_11_07_2016_15_40_19_174	2019-09-15 19:39:21	E:/Aggression Videos/Bailey1/RI35A_R9_171_I3Q_11_07_2016_15_40_19_174_0.avi	1088.400	30.0	No focal subject	1	401.533		STATE	701.201	702.775	1.574
RI35A_R9_171_I3Q_11_07_2016_15_40_19_174	2019-09-15 19:39:21	E:/Aggression Videos/Bailey1/RI35A_R9_171_I3Q_11_07_2016_15_40_19_174_0.avi	1088.400	30.0	No focal subject	8	420.165		STATE	719.833	778.966	59.133
RI35A_R9_171_I3Q_11_07_2016_15_40_19_174	2019-09-15 19:39:21	E:/Aggression Videos/Bailey1/RI35A_R9_171_I3Q_11_07_2016_15_40_19_174_0.avi	1088.400	30.0	No focal subject	1	431.849		STATE	731.517	732.317	0.800
RI35A_R9_171_I3Q_11_07_2016_15_40_19_174	2019-09-15 19:39:21	E:/Aggression Videos/Bailey1/RI35A_R9_171_I3Q_11_07_2016_15_40_19_174_0.avi	1088.400	30.0	No focal subject	2	444.449		STATE	744.117	747.491	3.374
RI35A_R9_171_I3Q_11_07_2016_15_40_19_174	2019-09-15 19:39:21	E:/Aggression Videos/Bailey1/RI35A_R9_171_I3Q_11_07_2016_15_40_19_174_0.avi	1088.400	30.0	No focal subject	2	452.174		STATE	751.842	753.392	1.550
RI35A_R9_171_I3Q_11_07_2016_15_40_19_174	2019-09-15 19:39:21	E:/Aggression Videos/Bailey1/RI35A_R9_171_I3Q_11_07_2016_15_40_19_174_0.avi	1088.400	30.0	No focal subject	2	473.099		STATE	772.767	784.517	11.750
RI35A_R9_171_I3Q_11_07_2016_15_40_19_174	2019-09-15 19:39:21	E:/Aggression Videos/Bailey1/RI35A_R9_171_I3Q_11_07_2016_15_40_19_174_0.avi	1088.400	30.0	No focal subject	2	524.023		STATE	823.691	829.992	6.301
RI35A_R9_171_I3Q_11_07_2016_15_40_19_174	2019-09-15 19:39:21	E:/Aggression Videos/Bailey1/RI35A_R9_171_I3Q_11_07_2016_15_40_19_174_0.avi	1088.400	30.0	No focal subject	1	537.824		STATE	837.492	839.317	1.825
RI35A_R9_171_I3Q_11_07_2016_15_40_19_174	2019-09-15 19:39:21	E:/Aggression Videos/Bailey1/RI35A_R9_171_I3Q_11_07_2016_15_40_19_174_0.avi	1088.400	30.0	No focal subject	8	540.232		STATE	839.900	899.291	59.391
RI35A_R9_171_I3Q_11_07_2016_15_40_19_174	2019-09-15 19:39:21	E:/Aggression Videos/Bailey1/RI35A_R9_171_I3Q_11_07_2016_15_40_19_174_0.avi	1088.400	30.0	No focal subject	2	568.557		STATE	868.225	870.301	2.076
RI35A_R9_171_I3Q_11_07_2016_15_40_19_174	2019-09-15 19:39:21	E:/Aggression Videos/Bailey1/RI35A_R9_171_I3Q_11_07_2016_15_40_19_174_0.avi	1088.400	30.0	No focal subject	1	594.132		STATE	893.800	897.625	3.825
RI35A_R9_171_I3Q_11_07_2016_15_40_19_174	2019-09-15 19:39:21	E:/Aggression Videos/Bailey1/RI35A_R9_171_I3Q_11_07_2016_15_40_19_174_0.avi	1088.400	30.0	No focal subject	2	627.649		STATE	927.317	935.917	8.600
RI35A_R9_171_I3Q_11_07_2016_15_40_19_174	2019-09-15 19:39:21	E:/Aggression Videos/Bailey1/RI35A_R9_171_I3Q_11_07_2016_15_40_19_174_0.avi	1088.400	30.0	No focal subject	3	659.274		STATE	958.942	959.492	0.550
RI35A_R9_171_I3Q_11_07_2016_15_40_19_174	2019-09-15 19:39:21	E:/Aggression Videos/Bailey1/RI35A_R9_171_I3Q_11_07_2016_15_40_19_174_0.avi	1088.400	30.0	No focal subject	2	661.624		STATE	961.292	962.317	1.025
RI35A_R9_171_I3Q_11_07_2016_15_40_19_174	2019-09-15 19:39:21	E:/Aggression Videos/Bailey1/RI35A_R9_171_I3Q_11_07_2016_15_40_19_174_0.avi	1088.400	30.0	No focal subject	4	667.824		STATE	967.492	971.492	4.000
RI35A_R9_171_I3Q_11_07_2016_15_40_19_174	2019-09-15 19:39:21	E:/Aggression Videos/Bailey1/RI35A_R9_171_I3Q_11_07_2016_15_40_19_174_0.avi	1088.400	30.0	No focal subject	6	672.098		STATE	971.766	975.492	3.726
RI35A_R9_171_I3Q_11_07_2016_15_40_19_174	2019-09-15 19:39:21	E:/Aggression Videos/Bailey1/RI35A_R9_171_I3Q_11_07_2016_15_40_19_174_0.avi	1088.400	30.0	No focal subject	6	693.023		STATE	992.691	997.867	5.176
RI35A_R9_171_I3Q_11_07_2016_15_40_19_174	2019-09-15 19:39:21	E:/Aggression Videos/Bailey1/RI35A_R9_171_I3Q_11_07_2016_15_40_19_174_0.avi	1088.400	30.0	No focal subject	2	707.323		STATE	1006.991	1008.542	1.551
RI35A_R9_171_I3Q_11_07_2016_15_40_19_174	2019-09-15 19:39:21	E:/Aggression Videos/Bailey1/RI35A_R9_171_I3Q_11_07_2016_15_40_19_174_0.avi	1088.400	30.0	No focal subject	2	713.424		STATE	1013.092	1015.142	2.050
RI35A_R9_171_I3Q_11_07_2016_15_40_19_174	2019-09-15 19:39:21	E:/Aggression Videos/Bailey1/RI35A_R9_171_I3Q_11_07_2016_15_40_19_174_0.avi	1088.400	30.0	No focal subject	6	727.082		STATE	1026.750	1033.884	7.134
RI35A_R9_171_I3Q_11_07_2016_15_40_19_174	2019-09-15 19:39:21	E:/Aggression Videos/Bailey1/RI35A_R9_171_I3Q_11_07_2016_15_40_19_174_0.avi	1088.400	30.0	No focal subject	1	775.366		STATE	1075.034	1076.059	1.025

## Sheet: 35B
Observation id	Observation date	Media file	Total length	FPS	Subject	Behavior	Behavioral category	Modifiers	Behavior type	Start (s)	Stop (s)	Duration (s)	Comment start	Comment stop
RI35B_R9_171_I2P_11_29_2016_15_40_19_174	2019-09-15 20:03:46	E:/Aggression Videos/Bailey1/RI35B_R9_171_I2P_11_29_2016_15_40_19_174_0.avi	1083.070	30.0	No focal subject	0	-0.293		POINT	299.207	299.207	NA
RI35B_R9_171_I2P_11_29_2016_15_40_19_174	2019-09-15 20:03:46	E:/Aggression Videos/Bailey1/RI35B_R9_171_I2P_11_29_2016_15_40_19_174_0.avi	1083.070	30.0	No focal subject	2	8.001		STATE	307.501	334.839	27.338
RI35B_R9_171_I2P_11_29_2016_15_40_19_174	2019-09-15 20:03:46	E:/Aggression Videos/Bailey1/RI35B_R9_171_I2P_11_29_2016_15_40_19_174_0.avi	1083.070	30.0	No focal subject	6	54.1		STATE	353.600	355.351	1.751
RI35B_R9_171_I2P_11_29_2016_15_40_19_174	2019-09-15 20:03:46	E:/Aggression Videos/Bailey1/RI35B_R9_171_I2P_11_29_2016_15_40_19_174_0.avi	1083.070	30.0	No focal subject	2	57.701		STATE	357.201	359.726	2.525
RI35B_R9_171_I2P_11_29_2016_15_40_19_174	2019-09-15 20:03:46	E:/Aggression Videos/Bailey1/RI35B_R9_171_I2P_11_29_2016_15_40_19_174_0.avi	1083.070	30.0	No focal subject	8	60		STATE	359.500	418.943	59.443
RI35B_R9_171_I2P_11_29_2016_15_40_19_174	2019-09-15 20:03:46	E:/Aggression Videos/Bailey1/RI35B_R9_171_I2P_11_29_2016_15_40_19_174_0.avi	1083.070	30.0	No focal subject	2	93.226		STATE	392.726	394.600	1.874
RI35B_R9_171_I2P_11_29_2016_15_40_19_174	2019-09-15 20:03:46	E:/Aggression Videos/Bailey1/RI35B_R9_171_I2P_11_29_2016_15_40_19_174_0.avi	1083.070	30.0	No focal subject	2	98.554		STATE	398.054	398.850	0.796
RI35B_R9_171_I2P_11_29_2016_15_40_19_174	2019-09-15 20:03:46	E:/Aggression Videos/Bailey1/RI35B_R9_171_I2P_11_29_2016_15_40_19_174_0.avi	1083.070	30.0	No focal subject	2	151.4		STATE	450.900	459.000	8.100
RI35B_R9_171_I2P_11_29_2016_15_40_19_174	2019-09-15 20:03:46	E:/Aggression Videos/Bailey1/RI35B_R9_171_I2P_11_29_2016_15_40_19_174_0.avi	1083.070	30.0	No focal subject	6	168.223		STATE	467.723	470.549	2.826
RI35B_R9_171_I2P_11_29_2016_15_40_19_174	2019-09-15 20:03:46	E:/Aggression Videos/Bailey1/RI35B_R9_171_I2P_11_29_2016_15_40_19_174_0.avi	1083.070	30.0	No focal subject	8	180.183		STATE	479.683	539.000	59.317
RI35B_R9_171_I2P_11_29_2016_15_40_19_174	2019-09-15 20:03:46	E:/Aggression Videos/Bailey1/RI35B_R9_171_I2P_11_29_2016_15_40_19_174_0.avi	1083.070	30.0	No focal subject	6	182.292		STATE	481.792	488.183	6.391
RI35B_R9_171_I2P_11_29_2016_15_40_19_174	2019-09-15 20:03:46	E:/Aggression Videos/Bailey1/RI35B_R9_171_I2P_11_29_2016_15_40_19_174_0.avi	1083.070	30.0	No focal subject	6	198.013		STATE	497.513	504.084	6.571
RI35B_R9_171_I2P_11_29_2016_15_40_19_174	2019-09-15 20:03:46	E:/Aggression Videos/Bailey1/RI35B_R9_171_I2P_11_29_2016_15_40_19_174_0.avi	1083.070	30.0	No focal subject	6	211.409		STATE	510.909	512.012	1.103
RI35B_R9_171_I2P_11_29_2016_15_40_19_174	2019-09-15 20:03:46	E:/Aggression Videos/Bailey1/RI35B_R9_171_I2P_11_29_2016_15_40_19_174_0.avi	1083.070	30.0	No focal subject	4	212.528		STATE	512.028	513.351	1.323
RI35B_R9_171_I2P_11_29_2016_15_40_19_174	2019-09-15 20:03:46	E:/Aggression Videos/Bailey1/RI35B_R9_171_I2P_11_29_2016_15_40_19_174_0.avi	1083.070	30.0	No focal subject	6	213.851		STATE	513.351	517.300	3.949
RI35B_R9_171_I2P_11_29_2016_15_40_19_174	2019-09-15 20:03:46	E:/Aggression Videos/Bailey1/RI35B_R9_171_I2P_11_29_2016_15_40_19_174_0.avi	1083.070	30.0	No focal subject	6	222.229		STATE	521.729	527.275	5.546
RI35B_R9_171_I2P_11_29_2016_15_40_19_174	2019-09-15 20:03:46	E:/Aggression Videos/Bailey1/RI35B_R9_171_I2P_11_29_2016_15_40_19_174_0.avi	1083.070	30.0	No focal subject	4	233.869		STATE	533.369	534.718	1.349
RI35B_R9_171_I2P_11_29_2016_15_40_19_174	2019-09-15 20:03:46	E:/Aggression Videos/Bailey1/RI35B_R9_171_I2P_11_29_2016_15_40_19_174_0.avi	1083.070	30.0	No focal subject	6	239.567		STATE	539.067	542.667	3.600
RI35B_R9_171_I2P_11_29_2016_15_40_19_174	2019-09-15 20:03:46	E:/Aggression Videos/Bailey1/RI35B_R9_171_I2P_11_29_2016_15_40_19_174_0.avi	1083.070	30.0	No focal subject	4	244.901		STATE	544.401	546.500	2.099
RI35B_R9_171_I2P_11_29_2016_15_40_19_174	2019-09-15 20:03:46	E:/Aggression Videos/Bailey1/RI35B_R9_171_I2P_11_29_2016_15_40_19_174_0.avi	1083.070	30.0	No focal subject	2	291.771		STATE	591.271	600.847	9.576
RI35B_R9_171_I2P_11_29_2016_15_40_19_174	2019-09-15 20:03:46	E:/Aggression Videos/Bailey1/RI35B_R9_171_I2P_11_29_2016_15_40_19_174_0.avi	1083.070	30.0	No focal subject	8	300.171		STATE	599.671	659.105	59.434
RI35B_R9_171_I2P_11_29_2016_15_40_19_174	2019-09-15 20:03:46	E:/Aggression Videos/Bailey1/RI35B_R9_171_I2P_11_29_2016_15_40_19_174_0.avi	1083.070	30.0	No focal subject	1	309.347		STATE	608.847	609.097	0.250
RI35B_R9_171_I2P_11_29_2016_15_40_19_174	2019-09-15 20:03:46	E:/Aggression Videos/Bailey1/RI35B_R9_171_I2P_11_29_2016_15_40_19_174_0.avi	1083.070	30.0	No focal subject	1	325.131		STATE	624.631	625.156	0.525
RI35B_R9_171_I2P_11_29_2016_15_40_19_174	2019-09-15 20:03:46	E:/Aggression Videos/Bailey1/RI35B_R9_171_I2P_11_29_2016_15_40_19_174_0.avi	1083.070	30.0	No focal subject	2	331.684		STATE	631.184	632.456	1.272
RI35B_R9_171_I2P_11_29_2016_15_40_19_174	2019-09-15 20:03:46	E:/Aggression Videos/Bailey1/RI35B_R9_171_I2P_11_29_2016_15_40_19_174_0.avi	1083.070	30.0	No focal subject	2	402.731		STATE	702.231	709.205	6.974
RI35B_R9_171_I2P_11_29_2016_15_40_19_174	2019-09-15 20:03:46	E:/Aggression Videos/Bailey1/RI35B_R9_171_I2P_11_29_2016_15_40_19_174_0.avi	1083.070	30.0	No focal subject	2	417.631		STATE	717.131	722.531	5.400
RI35B_R9_171_I2P_11_29_2016_15_40_19_174	2019-09-15 20:03:46	E:/Aggression Videos/Bailey1/RI35B_R9_171_I2P_11_29_2016_15_40_19_174_0.avi	1083.070	30.0	No focal subject	8	420.505		STATE	720.005	779.333	59.328
RI35B_R9_171_I2P_11_29_2016_15_40_19_174	2019-09-15 20:03:46	E:/Aggression Videos/Bailey1/RI35B_R9_171_I2P_11_29_2016_15_40_19_174_0.avi	1083.070	30.0	No focal subject	2	435.655		STATE	735.155	744.781	9.626
RI35B_R9_171_I2P_11_29_2016_15_40_19_174	2019-09-15 20:03:46	E:/Aggression Videos/Bailey1/RI35B_R9_171_I2P_11_29_2016_15_40_19_174_0.avi	1083.070	30.0	No focal subject	2	451.53		STATE	751.030	753.605	2.575
RI35B_R9_171_I2P_11_29_2016_15_40_19_174	2019-09-15 20:03:46	E:/Aggression Videos/Bailey1/RI35B_R9_171_I2P_11_29_2016_15_40_19_174_0.avi	1083.070	30.0	No focal subject	1	455.956		STATE	755.456	757.256	1.800
RI35B_R9_171_I2P_11_29_2016_15_40_19_174	2019-09-15 20:03:46	E:/Aggression Videos/Bailey1/RI35B_R9_171_I2P_11_29_2016_15_40_19_174_0.avi	1083.070	30.0	No focal subject	2	458.68		STATE	758.180	763.435	5.255
RI35B_R9_171_I2P_11_29_2016_15_40_19_174	2019-09-15 20:03:46	E:/Aggression Videos/Bailey1/RI35B_R9_171_I2P_11_29_2016_15_40_19_174_0.avi	1083.070	30.0	No focal subject	2	467.706		STATE	767.206	770.835	3.629
RI35B_R9_171_I2P_11_29_2016_15_40_19_174	2019-09-15 20:03:46	E:/Aggression Videos/Bailey1/RI35B_R9_171_I2P_11_29_2016_15_40_19_174_0.avi	1083.070	30.0	No focal subject	2	480.205		STATE	779.705	801.739	22.034
RI35B_R9_171_I2P_11_29_2016_15_40_19_174	2019-09-15 20:03:46	E:/Aggression Videos/Bailey1/RI35B_R9_171_I2P_11_29_2016_15_40_19_174_0.avi	1083.070	30.0	No focal subject	4	528.684		STATE	828.184	832.592	4.408
RI35B_R9_171_I2P_11_29_2016_15_40_19_174	2019-09-15 20:03:46	E:/Aggression Videos/Bailey1/RI35B_R9_171_I2P_11_29_2016_15_40_19_174_0.avi	1083.070	30.0	No focal subject	8	541.184		STATE	840.684	900.437	59.753
RI35B_R9_171_I2P_11_29_2016_15_40_19_174	2019-09-15 20:03:46	E:/Aggression Videos/Bailey1/RI35B_R9_171_I2P_11_29_2016_15_40_19_174_0.avi	1083.070	30.0	No focal subject	2	557.27		STATE	856.770	859.362	2.592
RI35B_R9_171_I2P_11_29_2016_15_40_19_174	2019-09-15 20:03:46	E:/Aggression Videos/Bailey1/RI35B_R9_171_I2P_11_29_2016_15_40_19_174_0.avi	1083.070	30.0	No focal subject	2	563.59		STATE	863.090	868.112	5.022
RI35B_R9_171_I2P_11_29_2016_15_40_19_174	2019-09-15 20:03:46	E:/Aggression Videos/Bailey1/RI35B_R9_171_I2P_11_29_2016_15_40_19_174_0.avi	1083.070	30.0	No focal subject	2	629.312		STATE	928.812	930.891	2.079
RI35B_R9_171_I2P_11_29_2016_15_40_19_174	2019-09-15 20:03:46	E:/Aggression Videos/Bailey1/RI35B_R9_171_I2P_11_29_2016_15_40_19_174_0.avi	1083.070	30.0	No focal subject	2	637.89		STATE	937.390	943.436	6.046
RI35B_R9_171_I2P_11_29_2016_15_40_19_174	2019-09-15 20:03:46	E:/Aggression Videos/Bailey1/RI35B_R9_171_I2P_11_29_2016_15_40_19_174_0.avi	1083.070	30.0	No focal subject	4	651.168		STATE	950.668	953.746	3.078
RI35B_R9_171_I2P_11_29_2016_15_40_19_174	2019-09-15 20:03:46	E:/Aggression Videos/Bailey1/RI35B_R9_171_I2P_11_29_2016_15_40_19_174_0.avi	1083.070	30.0	No focal subject	7	662.4		STATE	961.900	965.279	3.379
RI35B_R9_171_I2P_11_29_2016_15_40_19_174	2019-09-15 20:03:46	E:/Aggression Videos/Bailey1/RI35B_R9_171_I2P_11_29_2016_15_40_19_174_0.avi	1083.070	30.0	No focal subject	4	672.445		STATE	971.945	972.423	0.478
RI35B_R9_171_I2P_11_29_2016_15_40_19_174	2019-09-15 20:03:46	E:/Aggression Videos/Bailey1/RI35B_R9_171_I2P_11_29_2016_15_40_19_174_0.avi	1083.070	30.0	No focal subject	2	702.828		STATE	1002.328	1003.378	1.050
RI35B_R9_171_I2P_11_29_2016_15_40_19_174	2019-09-15 20:03:46	E:/Aggression Videos/Bailey1/RI35B_R9_171_I2P_11_29_2016_15_40_19_174_0.avi	1083.070	30.0	No focal subject	2	741.903		STATE	1041.403	1044.304	2.901
RI35B_R9_171_I2P_11_29_2016_15_40_19_174	2019-09-15 20:03:46	E:/Aggression Videos/Bailey1/RI35B_R9_171_I2P_11_29_2016_15_40_19_174_0.avi	1083.070	30.0	No focal subject	2	767.254		STATE	1066.754	1067.803	1.049

## Sheet: 35C
Observation id	Observation date	Media file	Total length	FPS	Subject	Behavior	Behavioral category	Modifiers	Behavior type	Start (s)	Stop (s)	Duration (s)	Comment start	Comment stop
RI35C_R9_171_I2S_12_06_2016_15_40_19_174	2019-09-15 20:26:04	E:/Aggression Videos/Bailey1/RI35C_R9_171_I2S_12_06_2016_15_40_19_174_0.avi	919.430	30.0	No focal subject	0	-0.958		POINT	298.842	298.842	NA
RI35C_R9_171_I2S_12_06_2016_15_40_19_174	2019-09-15 20:26:04	E:/Aggression Videos/Bailey1/RI35C_R9_171_I2S_12_06_2016_15_40_19_174_0.avi	919.430	30.0	No focal subject	2	5.596		STATE	305.396	340.767	35.371
RI35C_R9_171_I2S_12_06_2016_15_40_19_174	2019-09-15 20:26:04	E:/Aggression Videos/Bailey1/RI35C_R9_171_I2S_12_06_2016_15_40_19_174_0.avi	919.430	30.0	No focal subject	2	47.466		STATE	347.266	354.542	7.276
RI35C_R9_171_I2S_12_06_2016_15_40_19_174	2019-09-15 20:26:04	E:/Aggression Videos/Bailey1/RI35C_R9_171_I2S_12_06_2016_15_40_19_174_0.avi	919.430	30.0	No focal subject	2	57.347		STATE	357.147	363.601	6.454
RI35C_R9_171_I2S_12_06_2016_15_40_19_174	2019-09-15 20:26:04	E:/Aggression Videos/Bailey1/RI35C_R9_171_I2S_12_06_2016_15_40_19_174_0.avi	919.430	30.0	No focal subject	8	61.283		STATE	361.083	420.542	59.459
RI35C_R9_171_I2S_12_06_2016_15_40_19_174	2019-09-15 20:26:04	E:/Aggression Videos/Bailey1/RI35C_R9_171_I2S_12_06_2016_15_40_19_174_0.avi	919.430	30.0	No focal subject	2	70.53		STATE	370.330	372.134	1.804
RI35C_R9_171_I2S_12_06_2016_15_40_19_174	2019-09-15 20:26:04	E:/Aggression Videos/Bailey1/RI35C_R9_171_I2S_12_06_2016_15_40_19_174_0.avi	919.430	30.0	No focal subject	2	82.575		STATE	382.375	391.885	9.510
RI35C_R9_171_I2S_12_06_2016_15_40_19_174	2019-09-15 20:26:04	E:/Aggression Videos/Bailey1/RI35C_R9_171_I2S_12_06_2016_15_40_19_174_0.avi	919.430	30.0	No focal subject	6	92.617		STATE	392.417	403.071	10.654
RI35C_R9_171_I2S_12_06_2016_15_40_19_174	2019-09-15 20:26:04	E:/Aggression Videos/Bailey1/RI35C_R9_171_I2S_12_06_2016_15_40_19_174_0.avi	919.430	30.0	No focal subject	2	119.716		STATE	419.516	425.767	6.251
RI35C_R9_171_I2S_12_06_2016_15_40_19_174	2019-09-15 20:26:04	E:/Aggression Videos/Bailey1/RI35C_R9_171_I2S_12_06_2016_15_40_19_174_0.avi	919.430	30.0	No focal subject	2	141.267		STATE	441.067	454.142	13.075
RI35C_R9_171_I2S_12_06_2016_15_40_19_174	2019-09-15 20:26:04	E:/Aggression Videos/Bailey1/RI35C_R9_171_I2S_12_06_2016_15_40_19_174_0.avi	919.430	30.0	No focal subject	8	179.683		STATE	479.483	546.968	67.485
RI35C_R9_171_I2S_12_06_2016_15_40_19_174	2019-09-15 20:26:04	E:/Aggression Videos/Bailey1/RI35C_R9_171_I2S_12_06_2016_15_40_19_174_0.avi	919.430	30.0	No focal subject	1	204.734		STATE	504.534	507.109	2.575
RI35C_R9_171_I2S_12_06_2016_15_40_19_174	2019-09-15 20:26:04	E:/Aggression Videos/Bailey1/RI35C_R9_171_I2S_12_06_2016_15_40_19_174_0.avi	919.430	30.0	No focal subject	2	216.108		STATE	515.908	535.358	19.450
RI35C_R9_171_I2S_12_06_2016_15_40_19_174	2019-09-15 20:26:04	E:/Aggression Videos/Bailey1/RI35C_R9_171_I2S_12_06_2016_15_40_19_174_0.avi	919.430	30.0	No focal subject	1	238.066		STATE	537.866	541.289	3.423
RI35C_R9_171_I2S_12_06_2016_15_40_19_174	2019-09-15 20:26:04	E:/Aggression Videos/Bailey1/RI35C_R9_171_I2S_12_06_2016_15_40_19_174_0.avi	919.430	30.0	No focal subject	1	252.733		STATE	552.533	553.309	0.776
RI35C_R9_171_I2S_12_06_2016_15_40_19_174	2019-09-15 20:26:04	E:/Aggression Videos/Bailey1/RI35C_R9_171_I2S_12_06_2016_15_40_19_174_0.avi	919.430	30.0	No focal subject	2	261.109		STATE	560.909	564.033	3.124
RI35C_R9_171_I2S_12_06_2016_15_40_19_174	2019-09-15 20:26:04	E:/Aggression Videos/Bailey1/RI35C_R9_171_I2S_12_06_2016_15_40_19_174_0.avi	919.430	30.0	No focal subject	6	266.334		STATE	566.134	575.725	9.591
RI35C_R9_171_I2S_12_06_2016_15_40_19_174	2019-09-15 20:26:04	E:/Aggression Videos/Bailey1/RI35C_R9_171_I2S_12_06_2016_15_40_19_174_0.avi	919.430	30.0	No focal subject	4	276.192		STATE	575.992	580.344	4.352
RI35C_R9_171_I2S_12_06_2016_15_40_19_174	2019-09-15 20:26:04	E:/Aggression Videos/Bailey1/RI35C_R9_171_I2S_12_06_2016_15_40_19_174_0.avi	919.430	30.0	No focal subject	1	280.559		STATE	580.359	582.451	2.092
RI35C_R9_171_I2S_12_06_2016_15_40_19_174	2019-09-15 20:26:04	E:/Aggression Videos/Bailey1/RI35C_R9_171_I2S_12_06_2016_15_40_19_174_0.avi	919.430	30.0	No focal subject	1	284.501		STATE	584.301	586.127	1.826
RI35C_R9_171_I2S_12_06_2016_15_40_19_174	2019-09-15 20:26:04	E:/Aggression Videos/Bailey1/RI35C_R9_171_I2S_12_06_2016_15_40_19_174_0.avi	919.430	30.0	No focal subject	1	295.701		STATE	595.501	598.125	2.624
RI35C_R9_171_I2S_12_06_2016_15_40_19_174	2019-09-15 20:26:04	E:/Aggression Videos/Bailey1/RI35C_R9_171_I2S_12_06_2016_15_40_19_174_0.avi	919.430	30.0	No focal subject	8	299.833		STATE	599.633	663.359	63.726
RI35C_R9_171_I2S_12_06_2016_15_40_19_174	2019-09-15 20:26:04	E:/Aggression Videos/Bailey1/RI35C_R9_171_I2S_12_06_2016_15_40_19_174_0.avi	919.430	30.0	No focal subject	1	327.95		STATE	627.750	629.599	1.849
RI35C_R9_171_I2S_12_06_2016_15_40_19_174	2019-09-15 20:26:04	E:/Aggression Videos/Bailey1/RI35C_R9_171_I2S_12_06_2016_15_40_19_174_0.avi	919.430	30.0	No focal subject	1	378.459		STATE	678.259	682.815	4.556
RI35C_R9_171_I2S_12_06_2016_15_40_19_174	2019-09-15 20:26:04	E:/Aggression Videos/Bailey1/RI35C_R9_171_I2S_12_06_2016_15_40_19_174_0.avi	919.430	30.0	No focal subject	2	383.808		STATE	683.608	685.466	1.858
RI35C_R9_171_I2S_12_06_2016_15_40_19_174	2019-09-15 20:26:04	E:/Aggression Videos/Bailey1/RI35C_R9_171_I2S_12_06_2016_15_40_19_174_0.avi	919.430	30.0	No focal subject	2	396.416		STATE	696.216	704.391	8.175
RI35C_R9_171_I2S_12_06_2016_15_40_19_174	2019-09-15 20:26:04	E:/Aggression Videos/Bailey1/RI35C_R9_171_I2S_12_06_2016_15_40_19_174_0.avi	919.430	30.0	No focal subject	2	409.992		STATE	709.792	712.141	2.349
RI35C_R9_171_I2S_12_06_2016_15_40_19_174	2019-09-15 20:26:04	E:/Aggression Videos/Bailey1/RI35C_R9_171_I2S_12_06_2016_15_40_19_174_0.avi	919.430	30.0	No focal subject	2	416.417		STATE	716.217	718.558	2.341
RI35C_R9_171_I2S_12_06_2016_15_40_19_174	2019-09-15 20:26:04	E:/Aggression Videos/Bailey1/RI35C_R9_171_I2S_12_06_2016_15_40_19_174_0.avi	919.430	30.0	No focal subject	8	419.7		STATE	719.500	782.017	62.517
RI35C_R9_171_I2S_12_06_2016_15_40_19_174	2019-09-15 20:26:04	E:/Aggression Videos/Bailey1/RI35C_R9_171_I2S_12_06_2016_15_40_19_174_0.avi	919.430	30.0	No focal subject	2	420.951		STATE	720.751	738.476	17.725
RI35C_R9_171_I2S_12_06_2016_15_40_19_174	2019-09-15 20:26:04	E:/Aggression Videos/Bailey1/RI35C_R9_171_I2S_12_06_2016_15_40_19_174_0.avi	919.430	30.0	No focal subject	2	442.9		STATE	742.700	744.226	1.526
RI35C_R9_171_I2S_12_06_2016_15_40_19_174	2019-09-15 20:26:04	E:/Aggression Videos/Bailey1/RI35C_R9_171_I2S_12_06_2016_15_40_19_174_0.avi	919.430	30.0	No focal subject	1	448.551		STATE	748.351	750.950	2.599
RI35C_R9_171_I2S_12_06_2016_15_40_19_174	2019-09-15 20:26:04	E:/Aggression Videos/Bailey1/RI35C_R9_171_I2S_12_06_2016_15_40_19_174_0.avi	919.430	30.0	No focal subject	2	452.976		STATE	752.776	754.376	1.600
RI35C_R9_171_I2S_12_06_2016_15_40_19_174	2019-09-15 20:26:04	E:/Aggression Videos/Bailey1/RI35C_R9_171_I2S_12_06_2016_15_40_19_174_0.avi	919.430	30.0	No focal subject	2	462.926		STATE	762.726	770.450	7.724
RI35C_R9_171_I2S_12_06_2016_15_40_19_174	2019-09-15 20:26:04	E:/Aggression Videos/Bailey1/RI35C_R9_171_I2S_12_06_2016_15_40_19_174_0.avi	919.430	30.0	No focal subject	1	486.092		STATE	785.892	788.017	2.125
RI35C_R9_171_I2S_12_06_2016_15_40_19_174	2019-09-15 20:26:04	E:/Aggression Videos/Bailey1/RI35C_R9_171_I2S_12_06_2016_15_40_19_174_0.avi	919.430	30.0	No focal subject	2	535.795		STATE	835.595	839.267	3.672
RI35C_R9_171_I2S_12_06_2016_15_40_19_174	2019-09-15 20:26:04	E:/Aggression Videos/Bailey1/RI35C_R9_171_I2S_12_06_2016_15_40_19_174_0.avi	919.430	30.0	No focal subject	8	540.067		STATE	839.867	901.401	61.534
RI35C_R9_171_I2S_12_06_2016_15_40_19_174	2019-09-15 20:26:04	E:/Aggression Videos/Bailey1/RI35C_R9_171_I2S_12_06_2016_15_40_19_174_0.avi	919.430	30.0	No focal subject	2	609.449		STATE	909.249	914.167	4.918

## Sheet: 36A
Observation id	Observation date	Media file	Total length	FPS	Subject	Behavior	Behavioral category	Modifiers	Behavior type	Start (s)	Stop (s)	Duration (s)	Comment start	Comment stop
RI36A_R9_172_I4Q_11_08_2016_15_40_19_174	2019-09-15 20:49:11	E:/Aggression Videos/Bailey1/RI36A_R9_172_I4Q_11_08_2016_15_40_19_174_0.avi	1094.270	30.0	No focal subject	0	-0.983		POINT	299.234	299.234	NA
RI36A_R9_172_I4Q_11_08_2016_15_40_19_174	2019-09-15 20:49:11	E:/Aggression Videos/Bailey1/RI36A_R9_172_I4Q_11_08_2016_15_40_19_174_0.avi	1094.270	30.0	No focal subject	2	1.093		STATE	301.310	328.610	27.300
RI36A_R9_172_I4Q_11_08_2016_15_40_19_174	2019-09-15 20:49:11	E:/Aggression Videos/Bailey1/RI36A_R9_172_I4Q_11_08_2016_15_40_19_174_0.avi	1094.270	30.0	No focal subject	2	41.818		STATE	342.035	345.334	3.299
RI36A_R9_172_I4Q_11_08_2016_15_40_19_174	2019-09-15 20:49:11	E:/Aggression Videos/Bailey1/RI36A_R9_172_I4Q_11_08_2016_15_40_19_174_0.avi	1094.270	30.0	No focal subject	2	49.543		STATE	349.760	366.535	16.775
RI36A_R9_172_I4Q_11_08_2016_15_40_19_174	2019-09-15 20:49:11	E:/Aggression Videos/Bailey1/RI36A_R9_172_I4Q_11_08_2016_15_40_19_174_0.avi	1094.270	30.0	No focal subject	8	60		STATE	360.217	419.350	59.133
RI36A_R9_172_I4Q_11_08_2016_15_40_19_174	2019-09-15 20:49:11	E:/Aggression Videos/Bailey1/RI36A_R9_172_I4Q_11_08_2016_15_40_19_174_0.avi	1094.270	30.0	No focal subject	2	67.874		STATE	368.091	371.883	3.792
RI36A_R9_172_I4Q_11_08_2016_15_40_19_174	2019-09-15 20:49:11	E:/Aggression Videos/Bailey1/RI36A_R9_172_I4Q_11_08_2016_15_40_19_174_0.avi	1094.270	30.0	No focal subject	2	83.016		STATE	383.233	391.060	7.827
RI36A_R9_172_I4Q_11_08_2016_15_40_19_174	2019-09-15 20:49:11	E:/Aggression Videos/Bailey1/RI36A_R9_172_I4Q_11_08_2016_15_40_19_174_0.avi	1094.270	30.0	No focal subject	2	93.166		STATE	393.383	398.334	4.951
RI36A_R9_172_I4Q_11_08_2016_15_40_19_174	2019-09-15 20:49:11	E:/Aggression Videos/Bailey1/RI36A_R9_172_I4Q_11_08_2016_15_40_19_174_0.avi	1094.270	30.0	No focal subject	2	103.524		STATE	403.741	417.634	13.893
RI36A_R9_172_I4Q_11_08_2016_15_40_19_174	2019-09-15 20:49:11	E:/Aggression Videos/Bailey1/RI36A_R9_172_I4Q_11_08_2016_15_40_19_174_0.avi	1094.270	30.0	No focal subject	2	120.492		STATE	420.709	426.133	5.424
RI36A_R9_172_I4Q_11_08_2016_15_40_19_174	2019-09-15 20:49:11	E:/Aggression Videos/Bailey1/RI36A_R9_172_I4Q_11_08_2016_15_40_19_174_0.avi	1094.270	30.0	No focal subject	2	133.917		STATE	434.134	435.734	1.600
RI36A_R9_172_I4Q_11_08_2016_15_40_19_174	2019-09-15 20:49:11	E:/Aggression Videos/Bailey1/RI36A_R9_172_I4Q_11_08_2016_15_40_19_174_0.avi	1094.270	30.0	No focal subject	2	139.441		STATE	439.658	450.534	10.876
RI36A_R9_172_I4Q_11_08_2016_15_40_19_174	2019-09-15 20:49:11	E:/Aggression Videos/Bailey1/RI36A_R9_172_I4Q_11_08_2016_15_40_19_174_0.avi	1094.270	30.0	No focal subject	3	176.526		STATE	476.743	479.117	2.374
RI36A_R9_172_I4Q_11_08_2016_15_40_19_174	2019-09-15 20:49:11	E:/Aggression Videos/Bailey1/RI36A_R9_172_I4Q_11_08_2016_15_40_19_174_0.avi	1094.270	30.0	No focal subject	8	180.217		STATE	480.434	540.093	59.659
RI36A_R9_172_I4Q_11_08_2016_15_40_19_174	2019-09-15 20:49:11	E:/Aggression Videos/Bailey1/RI36A_R9_172_I4Q_11_08_2016_15_40_19_174_0.avi	1094.270	30.0	No focal subject	2	197.717		STATE	497.934	501.584	3.650
RI36A_R9_172_I4Q_11_08_2016_15_40_19_174	2019-09-15 20:49:11	E:/Aggression Videos/Bailey1/RI36A_R9_172_I4Q_11_08_2016_15_40_19_174_0.avi	1094.270	30.0	No focal subject	2	208.467		STATE	508.684	521.518	12.834
RI36A_R9_172_I4Q_11_08_2016_15_40_19_174	2019-09-15 20:49:11	E:/Aggression Videos/Bailey1/RI36A_R9_172_I4Q_11_08_2016_15_40_19_174_0.avi	1094.270	30.0	No focal subject	6	271.201		STATE	571.418	629.468	58.050
RI36A_R9_172_I4Q_11_08_2016_15_40_19_174	2019-09-15 20:49:11	E:/Aggression Videos/Bailey1/RI36A_R9_172_I4Q_11_08_2016_15_40_19_174_0.avi	1094.270	30.0	No focal subject	8	300.109		STATE	600.326	658.966	58.640
RI36A_R9_172_I4Q_11_08_2016_15_40_19_174	2019-09-15 20:49:11	E:/Aggression Videos/Bailey1/RI36A_R9_172_I4Q_11_08_2016_15_40_19_174_0.avi	1094.270	30.0	No focal subject	1	337.999		STATE	638.216	639.717	1.501
RI36A_R9_172_I4Q_11_08_2016_15_40_19_174	2019-09-15 20:49:11	E:/Aggression Videos/Bailey1/RI36A_R9_172_I4Q_11_08_2016_15_40_19_174_0.avi	1094.270	30.0	No focal subject	1	341.849		STATE	642.066	644.909	2.843
RI36A_R9_172_I4Q_11_08_2016_15_40_19_174	2019-09-15 20:49:11	E:/Aggression Videos/Bailey1/RI36A_R9_172_I4Q_11_08_2016_15_40_19_174_0.avi	1094.270	30.0	No focal subject	2	355.399		STATE	655.616	655.883	0.267
RI36A_R9_172_I4Q_11_08_2016_15_40_19_174	2019-09-15 20:49:11	E:/Aggression Videos/Bailey1/RI36A_R9_172_I4Q_11_08_2016_15_40_19_174_0.avi	1094.270	30.0	No focal subject	1	357.373		STATE	657.590	658.591	1.001
RI36A_R9_172_I4Q_11_08_2016_15_40_19_174	2019-09-15 20:49:11	E:/Aggression Videos/Bailey1/RI36A_R9_172_I4Q_11_08_2016_15_40_19_174_0.avi	1094.270	30.0	No focal subject	1	373.782		STATE	673.999	676.873	2.874
RI36A_R9_172_I4Q_11_08_2016_15_40_19_174	2019-09-15 20:49:11	E:/Aggression Videos/Bailey1/RI36A_R9_172_I4Q_11_08_2016_15_40_19_174_0.avi	1094.270	30.0	No focal subject	1	381.232		STATE	681.449	684.249	2.800
RI36A_R9_172_I4Q_11_08_2016_15_40_19_174	2019-09-15 20:49:11	E:/Aggression Videos/Bailey1/RI36A_R9_172_I4Q_11_08_2016_15_40_19_174_0.avi	1094.270	30.0	No focal subject	1	388.607		STATE	688.824	699.998	11.174
RI36A_R9_172_I4Q_11_08_2016_15_40_19_174	2019-09-15 20:49:11	E:/Aggression Videos/Bailey1/RI36A_R9_172_I4Q_11_08_2016_15_40_19_174_0.avi	1094.270	30.0	No focal subject	8	420.032		STATE	720.249	779.681	59.432
RI36A_R9_172_I4Q_11_08_2016_15_40_19_174	2019-09-15 20:49:11	E:/Aggression Videos/Bailey1/RI36A_R9_172_I4Q_11_08_2016_15_40_19_174_0.avi	1094.270	30.0	No focal subject	1	422.682		STATE	722.899	729.898	6.999
RI36A_R9_172_I4Q_11_08_2016_15_40_19_174	2019-09-15 20:49:11	E:/Aggression Videos/Bailey1/RI36A_R9_172_I4Q_11_08_2016_15_40_19_174_0.avi	1094.270	30.0	No focal subject	1	446.357		STATE	746.574	748.125	1.551
RI36A_R9_172_I4Q_11_08_2016_15_40_19_174	2019-09-15 20:49:11	E:/Aggression Videos/Bailey1/RI36A_R9_172_I4Q_11_08_2016_15_40_19_174_0.avi	1094.270	30.0	No focal subject	2	454.907		STATE	755.124	756.673	1.549
RI36A_R9_172_I4Q_11_08_2016_15_40_19_174	2019-09-15 20:49:11	E:/Aggression Videos/Bailey1/RI36A_R9_172_I4Q_11_08_2016_15_40_19_174_0.avi	1094.270	30.0	No focal subject	1	473.506		STATE	773.723	783.307	9.584
RI36A_R9_172_I4Q_11_08_2016_15_40_19_174	2019-09-15 20:49:11	E:/Aggression Videos/Bailey1/RI36A_R9_172_I4Q_11_08_2016_15_40_19_174_0.avi	1094.270	30.0	No focal subject	2	490.339		STATE	790.556	791.615	1.059
RI36A_R9_172_I4Q_11_08_2016_15_40_19_174	2019-09-15 20:49:11	E:/Aggression Videos/Bailey1/RI36A_R9_172_I4Q_11_08_2016_15_40_19_174_0.avi	1094.270	30.0	No focal subject	5	492.198		STATE	792.415	793.166	0.751
RI36A_R9_172_I4Q_11_08_2016_15_40_19_174	2019-09-15 20:49:11	E:/Aggression Videos/Bailey1/RI36A_R9_172_I4Q_11_08_2016_15_40_19_174_0.avi	1094.270	30.0	No focal subject	6	493.199		STATE	793.416	806.523	13.107
RI36A_R9_172_I4Q_11_08_2016_15_40_19_174	2019-09-15 20:49:11	E:/Aggression Videos/Bailey1/RI36A_R9_172_I4Q_11_08_2016_15_40_19_174_0.avi	1094.270	30.0	No focal subject	8	542.965		STATE	843.182	902.566	59.384
RI36A_R9_172_I4Q_11_08_2016_15_40_19_174	2019-09-15 20:49:11	E:/Aggression Videos/Bailey1/RI36A_R9_172_I4Q_11_08_2016_15_40_19_174_0.avi	1094.270	30.0	No focal subject	1	574.606		STATE	874.823	875.323	0.500
RI36A_R9_172_I4Q_11_08_2016_15_40_19_174	2019-09-15 20:49:11	E:/Aggression Videos/Bailey1/RI36A_R9_172_I4Q_11_08_2016_15_40_19_174_0.avi	1094.270	30.0	No focal subject	1	642.807		STATE	943.024	944.048	1.024
RI36A_R9_172_I4Q_11_08_2016_15_40_19_174	2019-09-15 20:49:11	E:/Aggression Videos/Bailey1/RI36A_R9_172_I4Q_11_08_2016_15_40_19_174_0.avi	1094.270	30.0	No focal subject	7	669.332		STATE	969.549	969.824	0.275
RI36A_R9_172_I4Q_11_08_2016_15_40_19_174	2019-09-15 20:49:11	E:/Aggression Videos/Bailey1/RI36A_R9_172_I4Q_11_08_2016_15_40_19_174_0.avi	1094.270	30.0	No focal subject	1	679.47		STATE	979.687	983.787	4.100
RI36A_R9_172_I4Q_11_08_2016_15_40_19_174	2019-09-15 20:49:11	E:/Aggression Videos/Bailey1/RI36A_R9_172_I4Q_11_08_2016_15_40_19_174_0.avi	1094.270	30.0	No focal subject	1	691.72		STATE	991.937	992.463	0.526
RI36A_R9_172_I4Q_11_08_2016_15_40_19_174	2019-09-15 20:49:11	E:/Aggression Videos/Bailey1/RI36A_R9_172_I4Q_11_08_2016_15_40_19_174_0.avi	1094.270	30.0	No focal subject	1	769.621		STATE	1069.838	1086.113	16.275

## Sheet: 36B
Observation id	Observation date	Media file	Total length	FPS	Subject	Behavior	Behavioral category	Modifiers	Behavior type	Start (s)	Stop (s)	Duration (s)	Comment start	Comment stop
RI36B_R9_172_I2R_12_08_2016_15_40_19_174	2019-09-15 21:15:45	E:/Aggression Videos/Bailey1/RI36B_R9_172_I2R_12_08_2016_15_40_19_174_0.avi	1087.100	30.0	No focal subject	0	-0.008		POINT	299.759	299.759	NA
RI36B_R9_172_I2R_12_08_2016_15_40_19_174	2019-09-15 21:15:45	E:/Aggression Videos/Bailey1/RI36B_R9_172_I2R_12_08_2016_15_40_19_174_0.avi	1087.100	30.0	No focal subject	2	2.323		STATE	302.090	313.760	11.670
RI36B_R9_172_I2R_12_08_2016_15_40_19_174	2019-09-15 21:15:45	E:/Aggression Videos/Bailey1/RI36B_R9_172_I2R_12_08_2016_15_40_19_174_0.avi	1087.100	30.0	No focal subject	2	18.167		STATE	317.934	329.859	11.925
RI36B_R9_172_I2R_12_08_2016_15_40_19_174	2019-09-15 21:15:45	E:/Aggression Videos/Bailey1/RI36B_R9_172_I2R_12_08_2016_15_40_19_174_0.avi	1087.100	30.0	No focal subject	2	32.892		STATE	332.659	351.089	18.430
RI36B_R9_172_I2R_12_08_2016_15_40_19_174	2019-09-15 21:15:45	E:/Aggression Videos/Bailey1/RI36B_R9_172_I2R_12_08_2016_15_40_19_174_0.avi	1087.100	30.0	No focal subject	8	60		STATE	359.767	419.126	59.359
RI36B_R9_172_I2R_12_08_2016_15_40_19_174	2019-09-15 21:15:45	E:/Aggression Videos/Bailey1/RI36B_R9_172_I2R_12_08_2016_15_40_19_174_0.avi	1087.100	30.0	No focal subject	2	65.792		STATE	365.559	370.009	4.450
RI36B_R9_172_I2R_12_08_2016_15_40_19_174	2019-09-15 21:15:45	E:/Aggression Videos/Bailey1/RI36B_R9_172_I2R_12_08_2016_15_40_19_174_0.avi	1087.100	30.0	No focal subject	2	78.866		STATE	378.633	406.734	28.101
RI36B_R9_172_I2R_12_08_2016_15_40_19_174	2019-09-15 21:15:45	E:/Aggression Videos/Bailey1/RI36B_R9_172_I2R_12_08_2016_15_40_19_174_0.avi	1087.100	30.0	No focal subject	3	122.759		STATE	422.526	422.801	0.275
RI36B_R9_172_I2R_12_08_2016_15_40_19_174	2019-09-15 21:15:45	E:/Aggression Videos/Bailey1/RI36B_R9_172_I2R_12_08_2016_15_40_19_174_0.avi	1087.100	30.0	No focal subject	2	145.357		STATE	445.124	448.332	3.208
RI36B_R9_172_I2R_12_08_2016_15_40_19_174	2019-09-15 21:15:45	E:/Aggression Videos/Bailey1/RI36B_R9_172_I2R_12_08_2016_15_40_19_174_0.avi	1087.100	30.0	No focal subject	2	157.985		STATE	457.752	459.081	1.329
RI36B_R9_172_I2R_12_08_2016_15_40_19_174	2019-09-15 21:15:45	E:/Aggression Videos/Bailey1/RI36B_R9_172_I2R_12_08_2016_15_40_19_174_0.avi	1087.100	30.0	No focal subject	6	160.314		STATE	460.081	466.698	6.617
RI36B_R9_172_I2R_12_08_2016_15_40_19_174	2019-09-15 21:15:45	E:/Aggression Videos/Bailey1/RI36B_R9_172_I2R_12_08_2016_15_40_19_174_0.avi	1087.100	30.0	No focal subject	4	167.457		STATE	467.224	470.837	3.613
RI36B_R9_172_I2R_12_08_2016_15_40_19_174	2019-09-15 21:15:45	E:/Aggression Videos/Bailey1/RI36B_R9_172_I2R_12_08_2016_15_40_19_174_0.avi	1087.100	30.0	No focal subject	3	175.994		STATE	475.761	477.537	1.776
RI36B_R9_172_I2R_12_08_2016_15_40_19_174	2019-09-15 21:15:45	E:/Aggression Videos/Bailey1/RI36B_R9_172_I2R_12_08_2016_15_40_19_174_0.avi	1087.100	30.0	No focal subject	8	180.246		STATE	480.013	539.200	59.187
RI36B_R9_172_I2R_12_08_2016_15_40_19_174	2019-09-15 21:15:45	E:/Aggression Videos/Bailey1/RI36B_R9_172_I2R_12_08_2016_15_40_19_174_0.avi	1087.100	30.0	No focal subject	6	187.35		STATE	487.117	496.288	9.171
RI36B_R9_172_I2R_12_08_2016_15_40_19_174	2019-09-15 21:15:45	E:/Aggression Videos/Bailey1/RI36B_R9_172_I2R_12_08_2016_15_40_19_174_0.avi	1087.100	30.0	No focal subject	6	199.125		STATE	498.892	502.591	3.699
RI36B_R9_172_I2R_12_08_2016_15_40_19_174	2019-09-15 21:15:45	E:/Aggression Videos/Bailey1/RI36B_R9_172_I2R_12_08_2016_15_40_19_174_0.avi	1087.100	30.0	No focal subject	3	202.839		STATE	502.606	504.113	1.507
RI36B_R9_172_I2R_12_08_2016_15_40_19_174	2019-09-15 21:15:45	E:/Aggression Videos/Bailey1/RI36B_R9_172_I2R_12_08_2016_15_40_19_174_0.avi	1087.100	30.0	No focal subject	1	214.02		STATE	513.787	515.562	1.775
RI36B_R9_172_I2R_12_08_2016_15_40_19_174	2019-09-15 21:15:45	E:/Aggression Videos/Bailey1/RI36B_R9_172_I2R_12_08_2016_15_40_19_174_0.avi	1087.100	30.0	No focal subject	4	233.471		STATE	533.238	535.353	2.115
RI36B_R9_172_I2R_12_08_2016_15_40_19_174	2019-09-15 21:15:45	E:/Aggression Videos/Bailey1/RI36B_R9_172_I2R_12_08_2016_15_40_19_174_0.avi	1087.100	30.0	No focal subject	1	251.026		STATE	550.793	552.118	1.325
RI36B_R9_172_I2R_12_08_2016_15_40_19_174	2019-09-15 21:15:45	E:/Aggression Videos/Bailey1/RI36B_R9_172_I2R_12_08_2016_15_40_19_174_0.avi	1087.100	30.0	No focal subject	8	300.517		STATE	600.284	659.484	59.200
RI36B_R9_172_I2R_12_08_2016_15_40_19_174	2019-09-15 21:15:45	E:/Aggression Videos/Bailey1/RI36B_R9_172_I2R_12_08_2016_15_40_19_174_0.avi	1087.100	30.0	No focal subject	2	327.691		STATE	627.458	630.308	2.850
RI36B_R9_172_I2R_12_08_2016_15_40_19_174	2019-09-15 21:15:45	E:/Aggression Videos/Bailey1/RI36B_R9_172_I2R_12_08_2016_15_40_19_174_0.avi	1087.100	30.0	No focal subject	1	356.217		STATE	655.984	659.484	3.500
RI36B_R9_172_I2R_12_08_2016_15_40_19_174	2019-09-15 21:15:45	E:/Aggression Videos/Bailey1/RI36B_R9_172_I2R_12_08_2016_15_40_19_174_0.avi	1087.100	30.0	No focal subject	2	381.498		STATE	681.265	685.840	4.575
RI36B_R9_172_I2R_12_08_2016_15_40_19_174	2019-09-15 21:15:45	E:/Aggression Videos/Bailey1/RI36B_R9_172_I2R_12_08_2016_15_40_19_174_0.avi	1087.100	30.0	No focal subject	6	390.939		STATE	690.706	695.365	4.659
RI36B_R9_172_I2R_12_08_2016_15_40_19_174	2019-09-15 21:15:45	E:/Aggression Videos/Bailey1/RI36B_R9_172_I2R_12_08_2016_15_40_19_174_0.avi	1087.100	30.0	No focal subject	4	396.115		STATE	695.882	702.034	6.152
RI36B_R9_172_I2R_12_08_2016_15_40_19_174	2019-09-15 21:15:45	E:/Aggression Videos/Bailey1/RI36B_R9_172_I2R_12_08_2016_15_40_19_174_0.avi	1087.100	30.0	No focal subject	6	402.768		STATE	702.535	709.485	6.950
RI36B_R9_172_I2R_12_08_2016_15_40_19_174	2019-09-15 21:15:45	E:/Aggression Videos/Bailey1/RI36B_R9_172_I2R_12_08_2016_15_40_19_174_0.avi	1087.100	30.0	No focal subject	5	410		STATE	709.767	711.568	1.801
RI36B_R9_172_I2R_12_08_2016_15_40_19_174	2019-09-15 21:15:45	E:/Aggression Videos/Bailey1/RI36B_R9_172_I2R_12_08_2016_15_40_19_174_0.avi	1087.100	30.0	No focal subject	4	414.159		STATE	713.926	716.801	2.875
RI36B_R9_172_I2R_12_08_2016_15_40_19_174	2019-09-15 21:15:45	E:/Aggression Videos/Bailey1/RI36B_R9_172_I2R_12_08_2016_15_40_19_174_0.avi	1087.100	30.0	No focal subject	6	418.884		STATE	718.651	723.326	4.675
RI36B_R9_172_I2R_12_08_2016_15_40_19_174	2019-09-15 21:15:45	E:/Aggression Videos/Bailey1/RI36B_R9_172_I2R_12_08_2016_15_40_19_174_0.avi	1087.100	30.0	No focal subject	8	420.466		STATE	720.233	779.493	59.260
RI36B_R9_172_I2R_12_08_2016_15_40_19_174	2019-09-15 21:15:45	E:/Aggression Videos/Bailey1/RI36B_R9_172_I2R_12_08_2016_15_40_19_174_0.avi	1087.100	30.0	No focal subject	4	424.859		STATE	724.626	726.726	2.100
RI36B_R9_172_I2R_12_08_2016_15_40_19_174	2019-09-15 21:15:45	E:/Aggression Videos/Bailey1/RI36B_R9_172_I2R_12_08_2016_15_40_19_174_0.avi	1087.100	30.0	No focal subject	1	482.017		STATE	781.784	782.916	1.132
RI36B_R9_172_I2R_12_08_2016_15_40_19_174	2019-09-15 21:15:45	E:/Aggression Videos/Bailey1/RI36B_R9_172_I2R_12_08_2016_15_40_19_174_0.avi	1087.100	30.0	No focal subject	5	512.893		STATE	812.660	814.459	1.799
RI36B_R9_172_I2R_12_08_2016_15_40_19_174	2019-09-15 21:15:45	E:/Aggression Videos/Bailey1/RI36B_R9_172_I2R_12_08_2016_15_40_19_174_0.avi	1087.100	30.0	No focal subject	6	517.717		STATE	817.484	824.409	6.925
RI36B_R9_172_I2R_12_08_2016_15_40_19_174	2019-09-15 21:15:45	E:/Aggression Videos/Bailey1/RI36B_R9_172_I2R_12_08_2016_15_40_19_174_0.avi	1087.100	30.0	No focal subject	4	525.433		STATE	825.200	827.527	2.327
RI36B_R9_172_I2R_12_08_2016_15_40_19_174	2019-09-15 21:15:45	E:/Aggression Videos/Bailey1/RI36B_R9_172_I2R_12_08_2016_15_40_19_174_0.avi	1087.100	30.0	No focal subject	6	528.034		STATE	827.801	831.700	3.899
RI36B_R9_172_I2R_12_08_2016_15_40_19_174	2019-09-15 21:15:45	E:/Aggression Videos/Bailey1/RI36B_R9_172_I2R_12_08_2016_15_40_19_174_0.avi	1087.100	30.0	No focal subject	6	535.858		STATE	835.625	842.151	6.526
RI36B_R9_172_I2R_12_08_2016_15_40_19_174	2019-09-15 21:15:45	E:/Aggression Videos/Bailey1/RI36B_R9_172_I2R_12_08_2016_15_40_19_174_0.avi	1087.100	30.0	No focal subject	8	540.758		STATE	840.525	899.367	58.842
RI36B_R9_172_I2R_12_08_2016_15_40_19_174	2019-09-15 21:15:45	E:/Aggression Videos/Bailey1/RI36B_R9_172_I2R_12_08_2016_15_40_19_174_0.avi	1087.100	30.0	No focal subject	6	544.025		STATE	843.792	844.484	0.692
RI36B_R9_172_I2R_12_08_2016_15_40_19_174	2019-09-15 21:15:45	E:/Aggression Videos/Bailey1/RI36B_R9_172_I2R_12_08_2016_15_40_19_174_0.avi	1087.100	30.0	No focal subject	6	547.375		STATE	847.142	849.842	2.700
RI36B_R9_172_I2R_12_08_2016_15_40_19_174	2019-09-15 21:15:45	E:/Aggression Videos/Bailey1/RI36B_R9_172_I2R_12_08_2016_15_40_19_174_0.avi	1087.100	30.0	No focal subject	1	601.924		STATE	901.691	906.442	4.751
RI36B_R9_172_I2R_12_08_2016_15_40_19_174	2019-09-15 21:15:45	E:/Aggression Videos/Bailey1/RI36B_R9_172_I2R_12_08_2016_15_40_19_174_0.avi	1087.100	30.0	No focal subject	1	609.275		STATE	909.042	910.591	1.549
RI36B_R9_172_I2R_12_08_2016_15_40_19_174	2019-09-15 21:15:45	E:/Aggression Videos/Bailey1/RI36B_R9_172_I2R_12_08_2016_15_40_19_174_0.avi	1087.100	30.0	No focal subject	1	626.349		STATE	926.116	927.392	1.276
RI36B_R9_172_I2R_12_08_2016_15_40_19_174	2019-09-15 21:15:45	E:/Aggression Videos/Bailey1/RI36B_R9_172_I2R_12_08_2016_15_40_19_174_0.avi	1087.100	30.0	No focal subject	1	638.974		STATE	938.741	980.692	41.951
RI36B_R9_172_I2R_12_08_2016_15_40_19_174	2019-09-15 21:15:45	E:/Aggression Videos/Bailey1/RI36B_R9_172_I2R_12_08_2016_15_40_19_174_0.avi	1087.100	30.0	No focal subject	2	691.124		STATE	990.891	993.441	2.550
RI36B_R9_172_I2R_12_08_2016_15_40_19_174	2019-09-15 21:15:45	E:/Aggression Videos/Bailey1/RI36B_R9_172_I2R_12_08_2016_15_40_19_174_0.avi	1087.100	30.0	No focal subject	2	709.425		STATE	1009.192	1010.467	1.275
RI36B_R9_172_I2R_12_08_2016_15_40_19_174	2019-09-15 21:15:45	E:/Aggression Videos/Bailey1/RI36B_R9_172_I2R_12_08_2016_15_40_19_174_0.avi	1087.100	30.0	No focal subject	6	712.249		STATE	1012.016	1022.067	10.051
RI36B_R9_172_I2R_12_08_2016_15_40_19_174	2019-09-15 21:15:45	E:/Aggression Videos/Bailey1/RI36B_R9_172_I2R_12_08_2016_15_40_19_174_0.avi	1087.100	30.0	No focal subject	6	725.675		STATE	1025.442	1030.467	5.025
RI36B_R9_172_I2R_12_08_2016_15_40_19_174	2019-09-15 21:15:45	E:/Aggression Videos/Bailey1/RI36B_R9_172_I2R_12_08_2016_15_40_19_174_0.avi	1087.100	30.0	No focal subject	4	733.032		STATE	1032.799	1034.599	1.800
RI36B_R9_172_I2R_12_08_2016_15_40_19_174	2019-09-15 21:15:45	E:/Aggression Videos/Bailey1/RI36B_R9_172_I2R_12_08_2016_15_40_19_174_0.avi	1087.100	30.0	No focal subject	5	736.708		STATE	1036.475	1038.792	2.317
RI36B_R9_172_I2R_12_08_2016_15_40_19_174	2019-09-15 21:15:45	E:/Aggression Videos/Bailey1/RI36B_R9_172_I2R_12_08_2016_15_40_19_174_0.avi	1087.100	30.0	No focal subject	4	740.325		STATE	1040.092	1042.443	2.351
RI36B_R9_172_I2R_12_08_2016_15_40_19_174	2019-09-15 21:15:45	E:/Aggression Videos/Bailey1/RI36B_R9_172_I2R_12_08_2016_15_40_19_174_0.avi	1087.100	30.0	No focal subject	1	776.004		STATE	1075.771	1077.596	1.825
RI36B_R9_172_I2R_12_08_2016_15_40_19_174	2019-09-15 21:15:45	E:/Aggression Videos/Bailey1/RI36B_R9_172_I2R_12_08_2016_15_40_19_174_0.avi	1087.100	30.0	No focal subject	2	780.151		STATE	1079.918	1080.716	0.798

## Sheet: 36C
Observation id	Observation date	Media file	Total length	FPS	Subject	Behavior	Behavioral category	Modifiers	Behavior type	Start (s)	Stop (s)	Duration (s)	Comment start	Comment stop
RI36C_R9_172_I2U_12_16_2016_15_40_19_174	2019-09-11 21:22:05	E:/Aggression Videos/Heather1/RI36C_R9_172_I2U_12_16_2016_15_40_19_174_0.avi	1071.670	30.0	No focal subject	0	-0.004		POINT	299.679	299.679	NA
RI36C_R9_172_I2U_12_16_2016_15_40_19_174	2019-09-11 21:22:05	E:/Aggression Videos/Heather1/RI36C_R9_172_I2U_12_16_2016_15_40_19_174_0.avi	1071.670	30.0	No focal subject	2	6.572		STATE	306.255	309.154	2.899
RI36C_R9_172_I2U_12_16_2016_15_40_19_174	2019-09-11 21:22:05	E:/Aggression Videos/Heather1/RI36C_R9_172_I2U_12_16_2016_15_40_19_174_0.avi	1071.670	30.0	No focal subject	2	11.518		STATE	311.201	313.801	2.600
RI36C_R9_172_I2U_12_16_2016_15_40_19_174	2019-09-11 21:22:05	E:/Aggression Videos/Heather1/RI36C_R9_172_I2U_12_16_2016_15_40_19_174_0.avi	1071.670	30.0	No focal subject	2	15.693		STATE	315.376	324.500	9.124
RI36C_R9_172_I2U_12_16_2016_15_40_19_174	2019-09-11 21:22:05	E:/Aggression Videos/Heather1/RI36C_R9_172_I2U_12_16_2016_15_40_19_174_0.avi	1071.670	30.0	No focal subject	2	29.018		STATE	328.701	333.626	4.925
RI36C_R9_172_I2U_12_16_2016_15_40_19_174	2019-09-11 21:22:05	E:/Aggression Videos/Heather1/RI36C_R9_172_I2U_12_16_2016_15_40_19_174_0.avi	1071.670	30.0	No focal subject	2	38.899		STATE	338.582	351.055	12.473
RI36C_R9_172_I2U_12_16_2016_15_40_19_174	2019-09-11 21:22:05	E:/Aggression Videos/Heather1/RI36C_R9_172_I2U_12_16_2016_15_40_19_174_0.avi	1071.670	30.0	No focal subject	2	53.973		STATE	353.656	360.400	6.744
RI36C_R9_172_I2U_12_16_2016_15_40_19_174	2019-09-11 21:22:05	E:/Aggression Videos/Heather1/RI36C_R9_172_I2U_12_16_2016_15_40_19_174_0.avi	1071.670	30.0	No focal subject	8	60		STATE	359.683	418.775	59.092
RI36C_R9_172_I2U_12_16_2016_15_40_19_174	2019-09-11 21:22:05	E:/Aggression Videos/Heather1/RI36C_R9_172_I2U_12_16_2016_15_40_19_174_0.avi	1071.670	30.0	No focal subject	2	84.318		STATE	384.001	387.625	3.624
RI36C_R9_172_I2U_12_16_2016_15_40_19_174	2019-09-11 21:22:05	E:/Aggression Videos/Heather1/RI36C_R9_172_I2U_12_16_2016_15_40_19_174_0.avi	1071.670	30.0	No focal subject	2	162.267		STATE	461.950	463.525	1.575
RI36C_R9_172_I2U_12_16_2016_15_40_19_174	2019-09-11 21:22:05	E:/Aggression Videos/Heather1/RI36C_R9_172_I2U_12_16_2016_15_40_19_174_0.avi	1071.670	30.0	No focal subject	1	175.246		STATE	474.929	477.255	2.326
RI36C_R9_172_I2U_12_16_2016_15_40_19_174	2019-09-11 21:22:05	E:/Aggression Videos/Heather1/RI36C_R9_172_I2U_12_16_2016_15_40_19_174_0.avi	1071.670	30.0	No focal subject	8	179.797		STATE	479.480	538.978	59.498
RI36C_R9_172_I2U_12_16_2016_15_40_19_174	2019-09-11 21:22:05	E:/Aggression Videos/Heather1/RI36C_R9_172_I2U_12_16_2016_15_40_19_174_0.avi	1071.670	30.0	No focal subject	2	200.712		STATE	500.395	511.071	10.676
RI36C_R9_172_I2U_12_16_2016_15_40_19_174	2019-09-11 21:22:05	E:/Aggression Videos/Heather1/RI36C_R9_172_I2U_12_16_2016_15_40_19_174_0.avi	1071.670	30.0	No focal subject	1	212.721		STATE	512.404	514.194	1.790
RI36C_R9_172_I2U_12_16_2016_15_40_19_174	2019-09-11 21:22:05	E:/Aggression Videos/Heather1/RI36C_R9_172_I2U_12_16_2016_15_40_19_174_0.avi	1071.670	30.0	No focal subject	2	228.571		STATE	528.254	531.379	3.125
RI36C_R9_172_I2U_12_16_2016_15_40_19_174	2019-09-11 21:22:05	E:/Aggression Videos/Heather1/RI36C_R9_172_I2U_12_16_2016_15_40_19_174_0.avi	1071.670	30.0	No focal subject	2	233.496		STATE	533.179	535.503	2.324
RI36C_R9_172_I2U_12_16_2016_15_40_19_174	2019-09-11 21:22:05	E:/Aggression Videos/Heather1/RI36C_R9_172_I2U_12_16_2016_15_40_19_174_0.avi	1071.670	30.0	No focal subject	6	236.346		STATE	536.029	543.820	7.791
RI36C_R9_172_I2U_12_16_2016_15_40_19_174	2019-09-11 21:22:05	E:/Aggression Videos/Heather1/RI36C_R9_172_I2U_12_16_2016_15_40_19_174_0.avi	1071.670	30.0	No focal subject	4	246.212		STATE	545.895	548.745	2.850
RI36C_R9_172_I2U_12_16_2016_15_40_19_174	2019-09-11 21:22:05	E:/Aggression Videos/Heather1/RI36C_R9_172_I2U_12_16_2016_15_40_19_174_0.avi	1071.670	30.0	No focal subject	4	252.663		STATE	552.346	553.646	1.300
RI36C_R9_172_I2U_12_16_2016_15_40_19_174	2019-09-11 21:22:05	E:/Aggression Videos/Heather1/RI36C_R9_172_I2U_12_16_2016_15_40_19_174_0.avi	1071.670	30.0	No focal subject	2	263.89		STATE	563.573	565.174	1.601
RI36C_R9_172_I2U_12_16_2016_15_40_19_174	2019-09-11 21:22:05	E:/Aggression Videos/Heather1/RI36C_R9_172_I2U_12_16_2016_15_40_19_174_0.avi	1071.670	30.0	No focal subject	2	280.838		STATE	580.521	581.575	1.054
RI36C_R9_172_I2U_12_16_2016_15_40_19_174	2019-09-11 21:22:05	E:/Aggression Videos/Heather1/RI36C_R9_172_I2U_12_16_2016_15_40_19_174_0.avi	1071.670	30.0	No focal subject	1	295.238		STATE	594.921	595.720	0.799
RI36C_R9_172_I2U_12_16_2016_15_40_19_174	2019-09-11 21:22:05	E:/Aggression Videos/Heather1/RI36C_R9_172_I2U_12_16_2016_15_40_19_174_0.avi	1071.670	30.0	No focal subject	8	299.917		STATE	599.600	659.059	59.459
RI36C_R9_172_I2U_12_16_2016_15_40_19_174	2019-09-11 21:22:05	E:/Aggression Videos/Heather1/RI36C_R9_172_I2U_12_16_2016_15_40_19_174_0.avi	1071.670	30.0	No focal subject	1	307.472		STATE	607.155	610.055	2.900
RI36C_R9_172_I2U_12_16_2016_15_40_19_174	2019-09-11 21:22:05	E:/Aggression Videos/Heather1/RI36C_R9_172_I2U_12_16_2016_15_40_19_174_0.avi	1071.670	30.0	No focal subject	1	314.884		STATE	614.567	617.121	2.554
RI36C_R9_172_I2U_12_16_2016_15_40_19_174	2019-09-11 21:22:05	E:/Aggression Videos/Heather1/RI36C_R9_172_I2U_12_16_2016_15_40_19_174_0.avi	1071.670	30.0	No focal subject	1	319.618		STATE	619.301	621.401	2.100
RI36C_R9_172_I2U_12_16_2016_15_40_19_174	2019-09-11 21:22:05	E:/Aggression Videos/Heather1/RI36C_R9_172_I2U_12_16_2016_15_40_19_174_0.avi	1071.670	30.0	No focal subject	2	328.842		STATE	628.525	631.450	2.925
RI36C_R9_172_I2U_12_16_2016_15_40_19_174	2019-09-11 21:22:05	E:/Aggression Videos/Heather1/RI36C_R9_172_I2U_12_16_2016_15_40_19_174_0.avi	1071.670	30.0	No focal subject	6	332.576		STATE	632.259	643.493	11.234
RI36C_R9_172_I2U_12_16_2016_15_40_19_174	2019-09-11 21:22:05	E:/Aggression Videos/Heather1/RI36C_R9_172_I2U_12_16_2016_15_40_19_174_0.avi	1071.670	30.0	No focal subject	4	344.81		STATE	644.493	645.387	0.894
RI36C_R9_172_I2U_12_16_2016_15_40_19_174	2019-09-11 21:22:05	E:/Aggression Videos/Heather1/RI36C_R9_172_I2U_12_16_2016_15_40_19_174_0.avi	1071.670	30.0	No focal subject	6	345.72		STATE	645.403	650.367	4.964
RI36C_R9_172_I2U_12_16_2016_15_40_19_174	2019-09-11 21:22:05	E:/Aggression Videos/Heather1/RI36C_R9_172_I2U_12_16_2016_15_40_19_174_0.avi	1071.670	30.0	No focal subject	6	351.984		STATE	651.667	655.893	4.226
RI36C_R9_172_I2U_12_16_2016_15_40_19_174	2019-09-11 21:22:05	E:/Aggression Videos/Heather1/RI36C_R9_172_I2U_12_16_2016_15_40_19_174_0.avi	1071.670	30.0	No focal subject	6	357.784		STATE	657.467	660.568	3.101
RI36C_R9_172_I2U_12_16_2016_15_40_19_174	2019-09-11 21:22:05	E:/Aggression Videos/Heather1/RI36C_R9_172_I2U_12_16_2016_15_40_19_174_0.avi	1071.670	30.0	No focal subject	4	370.809		STATE	670.492	671.542	1.050
RI36C_R9_172_I2U_12_16_2016_15_40_19_174	2019-09-11 21:22:05	E:/Aggression Videos/Heather1/RI36C_R9_172_I2U_12_16_2016_15_40_19_174_0.avi	1071.670	30.0	No focal subject	8	419.55		STATE	719.233	778.559	59.326
RI36C_R9_172_I2U_12_16_2016_15_40_19_174	2019-09-11 21:22:05	E:/Aggression Videos/Heather1/RI36C_R9_172_I2U_12_16_2016_15_40_19_174_0.avi	1071.670	30.0	No focal subject	2	428.75		STATE	728.433	733.433	5.000
RI36C_R9_172_I2U_12_16_2016_15_40_19_174	2019-09-11 21:22:05	E:/Aggression Videos/Heather1/RI36C_R9_172_I2U_12_16_2016_15_40_19_174_0.avi	1071.670	30.0	No focal subject	2	436.35		STATE	736.033	739.392	3.359
RI36C_R9_172_I2U_12_16_2016_15_40_19_174	2019-09-11 21:22:05	E:/Aggression Videos/Heather1/RI36C_R9_172_I2U_12_16_2016_15_40_19_174_0.avi	1071.670	30.0	No focal subject	2	446		STATE	745.683	749.359	3.676
RI36C_R9_172_I2U_12_16_2016_15_40_19_174	2019-09-11 21:22:05	E:/Aggression Videos/Heather1/RI36C_R9_172_I2U_12_16_2016_15_40_19_174_0.avi	1071.670	30.0	No focal subject	2	484.775		STATE	784.458	786.033	1.575
RI36C_R9_172_I2U_12_16_2016_15_40_19_174	2019-09-11 21:22:05	E:/Aggression Videos/Heather1/RI36C_R9_172_I2U_12_16_2016_15_40_19_174_0.avi	1071.670	30.0	No focal subject	1	487.217		STATE	786.900	787.675	0.775
RI36C_R9_172_I2U_12_16_2016_15_40_19_174	2019-09-11 21:22:05	E:/Aggression Videos/Heather1/RI36C_R9_172_I2U_12_16_2016_15_40_19_174_0.avi	1071.670	30.0	No focal subject	2	491.592		STATE	791.275	793.351	2.076
RI36C_R9_172_I2U_12_16_2016_15_40_19_174	2019-09-11 21:22:05	E:/Aggression Videos/Heather1/RI36C_R9_172_I2U_12_16_2016_15_40_19_174_0.avi	1071.670	30.0	No focal subject	1	501.919		STATE	801.602	811.517	9.915
RI36C_R9_172_I2U_12_16_2016_15_40_19_174	2019-09-11 21:22:05	E:/Aggression Videos/Heather1/RI36C_R9_172_I2U_12_16_2016_15_40_19_174_0.avi	1071.670	30.0	No focal subject	8	540.178		STATE	839.861	899.096	59.235
RI36C_R9_172_I2U_12_16_2016_15_40_19_174	2019-09-11 21:22:05	E:/Aggression Videos/Heather1/RI36C_R9_172_I2U_12_16_2016_15_40_19_174_0.avi	1071.670	30.0	No focal subject	2	543.883		STATE	843.566	844.092	0.526
RI36C_R9_172_I2U_12_16_2016_15_40_19_174	2019-09-11 21:22:05	E:/Aggression Videos/Heather1/RI36C_R9_172_I2U_12_16_2016_15_40_19_174_0.avi	1071.670	30.0	No focal subject	2	554.233		STATE	853.916	856.595	2.679
RI36C_R9_172_I2U_12_16_2016_15_40_19_174	2019-09-11 21:22:05	E:/Aggression Videos/Heather1/RI36C_R9_172_I2U_12_16_2016_15_40_19_174_0.avi	1071.670	30.0	No focal subject	2	560.587		STATE	860.270	861.024	0.754
RI36C_R9_172_I2U_12_16_2016_15_40_19_174	2019-09-11 21:22:05	E:/Aggression Videos/Heather1/RI36C_R9_172_I2U_12_16_2016_15_40_19_174_0.avi	1071.670	30.0	No focal subject	2	574.513		STATE	874.196	875.971	1.775
RI36C_R9_172_I2U_12_16_2016_15_40_19_174	2019-09-11 21:22:05	E:/Aggression Videos/Heather1/RI36C_R9_172_I2U_12_16_2016_15_40_19_174_0.avi	1071.670	30.0	No focal subject	1	587.938		STATE	887.621	888.122	0.501
RI36C_R9_172_I2U_12_16_2016_15_40_19_174	2019-09-11 21:22:05	E:/Aggression Videos/Heather1/RI36C_R9_172_I2U_12_16_2016_15_40_19_174_0.avi	1071.670	30.0	No focal subject	2	589.293		STATE	888.976	892.621	3.645
RI36C_R9_172_I2U_12_16_2016_15_40_19_174	2019-09-11 21:22:05	E:/Aggression Videos/Heather1/RI36C_R9_172_I2U_12_16_2016_15_40_19_174_0.avi	1071.670	30.0	No focal subject	2	594.537		STATE	894.220	909.646	15.426
RI36C_R9_172_I2U_12_16_2016_15_40_19_174	2019-09-11 21:22:05	E:/Aggression Videos/Heather1/RI36C_R9_172_I2U_12_16_2016_15_40_19_174_0.avi	1071.670	30.0	No focal subject	2	621.038		STATE	920.721	931.671	10.950
RI36C_R9_172_I2U_12_16_2016_15_40_19_174	2019-09-11 21:22:05	E:/Aggression Videos/Heather1/RI36C_R9_172_I2U_12_16_2016_15_40_19_174_0.avi	1071.670	30.0	No focal subject	2	659.484		STATE	959.167	970.192	11.025
RI36C_R9_172_I2U_12_16_2016_15_40_19_174	2019-09-11 21:22:05	E:/Aggression Videos/Heather1/RI36C_R9_172_I2U_12_16_2016_15_40_19_174_0.avi	1071.670	30.0	No focal subject	2	675.581		STATE	975.264	993.266	18.002
RI36C_R9_172_I2U_12_16_2016_15_40_19_174	2019-09-11 21:22:05	E:/Aggression Videos/Heather1/RI36C_R9_172_I2U_12_16_2016_15_40_19_174_0.avi	1071.670	30.0	No focal subject	2	697.255		STATE	996.938	1005.789	8.851
RI36C_R9_172_I2U_12_16_2016_15_40_19_174	2019-09-11 21:22:05	E:/Aggression Videos/Heather1/RI36C_R9_172_I2U_12_16_2016_15_40_19_174_0.avi	1071.670	30.0	No focal subject	2	709.23		STATE	1008.913	1011.291	2.378
RI36C_R9_172_I2U_12_16_2016_15_40_19_174	2019-09-11 21:22:05	E:/Aggression Videos/Heather1/RI36C_R9_172_I2U_12_16_2016_15_40_19_174_0.avi	1071.670	30.0	No focal subject	6	741.879		STATE	1041.562	1055.304	13.742
RI36C_R9_172_I2U_12_16_2016_15_40_19_174	2019-09-11 21:22:05	E:/Aggression Videos/Heather1/RI36C_R9_172_I2U_12_16_2016_15_40_19_174_0.avi	1071.670	30.0	No focal subject	6	764.301		STATE	1063.984	1065.038	1.054
RI36C_R9_172_I2U_12_16_2016_15_40_19_174	2019-09-11 21:22:05	E:/Aggression Videos/Heather1/RI36C_R9_172_I2U_12_16_2016_15_40_19_174_0.avi	1071.670	30.0	No focal subject	6	767.205		STATE	1066.888	1068.217	1.329

## Sheet: 37A
Observation id	Observation date	Media file	Total length	FPS	Subject	Behavior	Behavioral category	Modifiers	Behavior type	Start (s)	Stop (s)	Duration (s)	Comment start	Comment stop
RI37A_R9_173_I5Q_11_08_2016_15_40_19_174	2019-09-16 19:14:56	E:/Aggression Videos/Bailey1/RI37A_R9_173_I5Q_11_08_2016_15_40_19_174_0.avi	962.730	30.0	No focal subject	0	-0.4		POINT	299.600	299.600	NA
RI37A_R9_173_I5Q_11_08_2016_15_40_19_174	2019-09-16 19:14:56	E:/Aggression Videos/Bailey1/RI37A_R9_173_I5Q_11_08_2016_15_40_19_174_0.avi	962.730	30.0	No focal subject	2	10.001		STATE	310.001	320.600	10.599
RI37A_R9_173_I5Q_11_08_2016_15_40_19_174	2019-09-16 19:14:56	E:/Aggression Videos/Bailey1/RI37A_R9_173_I5Q_11_08_2016_15_40_19_174_0.avi	962.730	30.0	No focal subject	2	23.375		STATE	323.375	328.475	5.100
RI37A_R9_173_I5Q_11_08_2016_15_40_19_174	2019-09-16 19:14:56	E:/Aggression Videos/Bailey1/RI37A_R9_173_I5Q_11_08_2016_15_40_19_174_0.avi	962.730	30.0	No focal subject	2	31.325		STATE	331.325	334.676	3.351
RI37A_R9_173_I5Q_11_08_2016_15_40_19_174	2019-09-16 19:14:56	E:/Aggression Videos/Bailey1/RI37A_R9_173_I5Q_11_08_2016_15_40_19_174_0.avi	962.730	30.0	No focal subject	2	36.251		STATE	336.251	339.101	2.850
RI37A_R9_173_I5Q_11_08_2016_15_40_19_174	2019-09-16 19:14:56	E:/Aggression Videos/Bailey1/RI37A_R9_173_I5Q_11_08_2016_15_40_19_174_0.avi	962.730	30.0	No focal subject	2	41.725		STATE	341.725	349.401	7.676
RI37A_R9_173_I5Q_11_08_2016_15_40_19_174	2019-09-16 19:14:56	E:/Aggression Videos/Bailey1/RI37A_R9_173_I5Q_11_08_2016_15_40_19_174_0.avi	962.730	30.0	No focal subject	2	51.725		STATE	351.725	357.400	5.675
RI37A_R9_173_I5Q_11_08_2016_15_40_19_174	2019-09-16 19:14:56	E:/Aggression Videos/Bailey1/RI37A_R9_173_I5Q_11_08_2016_15_40_19_174_0.avi	962.730	30.0	No focal subject	2	59.201		STATE	359.201	377.626	18.425
RI37A_R9_173_I5Q_11_08_2016_15_40_19_174	2019-09-16 19:14:56	E:/Aggression Videos/Bailey1/RI37A_R9_173_I5Q_11_08_2016_15_40_19_174_0.avi	962.730	30.0	No focal subject	8	60		STATE	360.000	419.443	59.443
RI37A_R9_173_I5Q_11_08_2016_15_40_19_174	2019-09-16 19:14:56	E:/Aggression Videos/Bailey1/RI37A_R9_173_I5Q_11_08_2016_15_40_19_174_0.avi	962.730	30.0	No focal subject	2	81.275		STATE	381.275	392.401	11.126
RI37A_R9_173_I5Q_11_08_2016_15_40_19_174	2019-09-16 19:14:56	E:/Aggression Videos/Bailey1/RI37A_R9_173_I5Q_11_08_2016_15_40_19_174_0.avi	962.730	30.0	No focal subject	2	99.825		STATE	399.825	407.301	7.476
RI37A_R9_173_I5Q_11_08_2016_15_40_19_174	2019-09-16 19:14:56	E:/Aggression Videos/Bailey1/RI37A_R9_173_I5Q_11_08_2016_15_40_19_174_0.avi	962.730	30.0	No focal subject	2	113.051		STATE	413.051	426.501	13.450
RI37A_R9_173_I5Q_11_08_2016_15_40_19_174	2019-09-16 19:14:56	E:/Aggression Videos/Bailey1/RI37A_R9_173_I5Q_11_08_2016_15_40_19_174_0.avi	962.730	30.0	No focal subject	2	129.345		STATE	429.345	437.070	7.725
RI37A_R9_173_I5Q_11_08_2016_15_40_19_174	2019-09-16 19:14:56	E:/Aggression Videos/Bailey1/RI37A_R9_173_I5Q_11_08_2016_15_40_19_174_0.avi	962.730	30.0	No focal subject	2	149.244		STATE	449.244	452.070	2.826
RI37A_R9_173_I5Q_11_08_2016_15_40_19_174	2019-09-16 19:14:56	E:/Aggression Videos/Bailey1/RI37A_R9_173_I5Q_11_08_2016_15_40_19_174_0.avi	962.730	30.0	No focal subject	2	156.969		STATE	456.969	477.595	20.626
RI37A_R9_173_I5Q_11_08_2016_15_40_19_174	2019-09-16 19:14:56	E:/Aggression Videos/Bailey1/RI37A_R9_173_I5Q_11_08_2016_15_40_19_174_0.avi	962.730	30.0	No focal subject	8	180.102		STATE	480.102	539.527	59.425
RI37A_R9_173_I5Q_11_08_2016_15_40_19_174	2019-09-16 19:14:56	E:/Aggression Videos/Bailey1/RI37A_R9_173_I5Q_11_08_2016_15_40_19_174_0.avi	962.730	30.0	No focal subject	1	184.478		STATE	484.478	485.853	1.375
RI37A_R9_173_I5Q_11_08_2016_15_40_19_174	2019-09-16 19:14:56	E:/Aggression Videos/Bailey1/RI37A_R9_173_I5Q_11_08_2016_15_40_19_174_0.avi	962.730	30.0	No focal subject	2	190.303		STATE	490.303	492.654	2.351
RI37A_R9_173_I5Q_11_08_2016_15_40_19_174	2019-09-16 19:14:56	E:/Aggression Videos/Bailey1/RI37A_R9_173_I5Q_11_08_2016_15_40_19_174_0.avi	962.730	30.0	No focal subject	2	227.603		STATE	527.603	528.902	1.299
RI37A_R9_173_I5Q_11_08_2016_15_40_19_174	2019-09-16 19:14:56	E:/Aggression Videos/Bailey1/RI37A_R9_173_I5Q_11_08_2016_15_40_19_174_0.avi	962.730	30.0	No focal subject	2	250.452		STATE	550.452	553.528	3.076
RI37A_R9_173_I5Q_11_08_2016_15_40_19_174	2019-09-16 19:14:56	E:/Aggression Videos/Bailey1/RI37A_R9_173_I5Q_11_08_2016_15_40_19_174_0.avi	962.730	30.0	No focal subject	6	255.302		STATE	555.302	572.552	17.250
RI37A_R9_173_I5Q_11_08_2016_15_40_19_174	2019-09-16 19:14:56	E:/Aggression Videos/Bailey1/RI37A_R9_173_I5Q_11_08_2016_15_40_19_174_0.avi	962.730	30.0	No focal subject	2	289.328		STATE	589.328	589.877	0.549
RI37A_R9_173_I5Q_11_08_2016_15_40_19_174	2019-09-16 19:14:56	E:/Aggression Videos/Bailey1/RI37A_R9_173_I5Q_11_08_2016_15_40_19_174_0.avi	962.730	30.0	No focal subject	1	296.636		STATE	596.636	599.210	2.574
RI37A_R9_173_I5Q_11_08_2016_15_40_19_174	2019-09-16 19:14:56	E:/Aggression Videos/Bailey1/RI37A_R9_173_I5Q_11_08_2016_15_40_19_174_0.avi	962.730	30.0	No focal subject	2	299.77		STATE	599.770	607.819	8.049
RI37A_R9_173_I5Q_11_08_2016_15_40_19_174	2019-09-16 19:14:56	E:/Aggression Videos/Bailey1/RI37A_R9_173_I5Q_11_08_2016_15_40_19_174_0.avi	962.730	30.0	No focal subject	8	300.06		STATE	600.060	659.728	59.668
RI37A_R9_173_I5Q_11_08_2016_15_40_19_174	2019-09-16 19:14:56	E:/Aggression Videos/Bailey1/RI37A_R9_173_I5Q_11_08_2016_15_40_19_174_0.avi	962.730	30.0	No focal subject	1	314.544		STATE	614.544	617.119	2.575
RI37A_R9_173_I5Q_11_08_2016_15_40_19_174	2019-09-16 19:14:56	E:/Aggression Videos/Bailey1/RI37A_R9_173_I5Q_11_08_2016_15_40_19_174_0.avi	962.730	30.0	No focal subject	2	318.944		STATE	618.944	621.020	2.076
RI37A_R9_173_I5Q_11_08_2016_15_40_19_174	2019-09-16 19:14:56	E:/Aggression Videos/Bailey1/RI37A_R9_173_I5Q_11_08_2016_15_40_19_174_0.avi	962.730	30.0	No focal subject	2	323.645		STATE	623.645	624.220	0.575
RI37A_R9_173_I5Q_11_08_2016_15_40_19_174	2019-09-16 19:14:56	E:/Aggression Videos/Bailey1/RI37A_R9_173_I5Q_11_08_2016_15_40_19_174_0.avi	962.730	30.0	No focal subject	2	328.269		STATE	628.269	630.569	2.300
RI37A_R9_173_I5Q_11_08_2016_15_40_19_174	2019-09-16 19:14:56	E:/Aggression Videos/Bailey1/RI37A_R9_173_I5Q_11_08_2016_15_40_19_174_0.avi	962.730	30.0	No focal subject	1	336.244		STATE	636.244	636.744	0.500
RI37A_R9_173_I5Q_11_08_2016_15_40_19_174	2019-09-16 19:14:56	E:/Aggression Videos/Bailey1/RI37A_R9_173_I5Q_11_08_2016_15_40_19_174_0.avi	962.730	30.0	No focal subject	1	339.394		STATE	639.394	640.469	1.075
RI37A_R9_173_I5Q_11_08_2016_15_40_19_174	2019-09-16 19:14:56	E:/Aggression Videos/Bailey1/RI37A_R9_173_I5Q_11_08_2016_15_40_19_174_0.avi	962.730	30.0	No focal subject	2	341.793		STATE	641.793	642.294	0.501
RI37A_R9_173_I5Q_11_08_2016_15_40_19_174	2019-09-16 19:14:56	E:/Aggression Videos/Bailey1/RI37A_R9_173_I5Q_11_08_2016_15_40_19_174_0.avi	962.730	30.0	No focal subject	2	347.943		STATE	647.943	652.319	4.376
RI37A_R9_173_I5Q_11_08_2016_15_40_19_174	2019-09-16 19:14:56	E:/Aggression Videos/Bailey1/RI37A_R9_173_I5Q_11_08_2016_15_40_19_174_0.avi	962.730	30.0	No focal subject	2	355.868		STATE	655.868	656.368	0.500
RI37A_R9_173_I5Q_11_08_2016_15_40_19_174	2019-09-16 19:14:56	E:/Aggression Videos/Bailey1/RI37A_R9_173_I5Q_11_08_2016_15_40_19_174_0.avi	962.730	30.0	No focal subject	2	363.793		STATE	663.793	664.293	0.500
RI37A_R9_173_I5Q_11_08_2016_15_40_19_174	2019-09-16 19:14:56	E:/Aggression Videos/Bailey1/RI37A_R9_173_I5Q_11_08_2016_15_40_19_174_0.avi	962.730	30.0	No focal subject	2	369.194		STATE	669.194	669.710	0.516
RI37A_R9_173_I5Q_11_08_2016_15_40_19_174	2019-09-16 19:14:56	E:/Aggression Videos/Bailey1/RI37A_R9_173_I5Q_11_08_2016_15_40_19_174_0.avi	962.730	30.0	No focal subject	6	370.461		STATE	670.461	679.851	9.390
RI37A_R9_173_I5Q_11_08_2016_15_40_19_174	2019-09-16 19:14:56	E:/Aggression Videos/Bailey1/RI37A_R9_173_I5Q_11_08_2016_15_40_19_174_0.avi	962.730	30.0	No focal subject	4	380.127		STATE	680.127	682.428	2.301
RI37A_R9_173_I5Q_11_08_2016_15_40_19_174	2019-09-16 19:14:56	E:/Aggression Videos/Bailey1/RI37A_R9_173_I5Q_11_08_2016_15_40_19_174_0.avi	962.730	30.0	No focal subject	6	382.953		STATE	682.953	686.602	3.649
RI37A_R9_173_I5Q_11_08_2016_15_40_19_174	2019-09-16 19:14:56	E:/Aggression Videos/Bailey1/RI37A_R9_173_I5Q_11_08_2016_15_40_19_174_0.avi	962.730	30.0	No focal subject	6	389.229		STATE	689.229	699.928	10.699
RI37A_R9_173_I5Q_11_08_2016_15_40_19_174	2019-09-16 19:14:56	E:/Aggression Videos/Bailey1/RI37A_R9_173_I5Q_11_08_2016_15_40_19_174_0.avi	962.730	30.0	No focal subject	6	408.003		STATE	708.003	721.336	13.333
RI37A_R9_173_I5Q_11_08_2016_15_40_19_174	2019-09-16 19:14:56	E:/Aggression Videos/Bailey1/RI37A_R9_173_I5Q_11_08_2016_15_40_19_174_0.avi	962.730	30.0	No focal subject	8	420.353		STATE	720.353	779.636	59.283
RI37A_R9_173_I5Q_11_08_2016_15_40_19_174	2019-09-16 19:14:56	E:/Aggression Videos/Bailey1/RI37A_R9_173_I5Q_11_08_2016_15_40_19_174_0.avi	962.730	30.0	No focal subject	6	423.711		STATE	723.711	727.311	3.600
RI37A_R9_173_I5Q_11_08_2016_15_40_19_174	2019-09-16 19:14:56	E:/Aggression Videos/Bailey1/RI37A_R9_173_I5Q_11_08_2016_15_40_19_174_0.avi	962.730	30.0	No focal subject	1	427.593		STATE	727.593	729.418	1.825
RI37A_R9_173_I5Q_11_08_2016_15_40_19_174	2019-09-16 19:14:56	E:/Aggression Videos/Bailey1/RI37A_R9_173_I5Q_11_08_2016_15_40_19_174_0.avi	962.730	30.0	No focal subject	4	430.543		STATE	730.543	732.344	1.801
RI37A_R9_173_I5Q_11_08_2016_15_40_19_174	2019-09-16 19:14:56	E:/Aggression Videos/Bailey1/RI37A_R9_173_I5Q_11_08_2016_15_40_19_174_0.avi	962.730	30.0	No focal subject	1	450.86		STATE	750.860	751.386	0.526
RI37A_R9_173_I5Q_11_08_2016_15_40_19_174	2019-09-16 19:14:56	E:/Aggression Videos/Bailey1/RI37A_R9_173_I5Q_11_08_2016_15_40_19_174_0.avi	962.730	30.0	No focal subject	1	459.611		STATE	759.611	760.419	0.808
RI37A_R9_173_I5Q_11_08_2016_15_40_19_174	2019-09-16 19:14:56	E:/Aggression Videos/Bailey1/RI37A_R9_173_I5Q_11_08_2016_15_40_19_174_0.avi	962.730	30.0	No focal subject	2	464.669		STATE	764.669	767.793	3.124
RI37A_R9_173_I5Q_11_08_2016_15_40_19_174	2019-09-16 19:14:56	E:/Aggression Videos/Bailey1/RI37A_R9_173_I5Q_11_08_2016_15_40_19_174_0.avi	962.730	30.0	No focal subject	6	472.169		STATE	772.169	779.669	7.500
RI37A_R9_173_I5Q_11_08_2016_15_40_19_174	2019-09-16 19:14:56	E:/Aggression Videos/Bailey1/RI37A_R9_173_I5Q_11_08_2016_15_40_19_174_0.avi	962.730	30.0	No focal subject	4	483.068		STATE	783.068	784.361	1.293
RI37A_R9_173_I5Q_11_08_2016_15_40_19_174	2019-09-16 19:14:56	E:/Aggression Videos/Bailey1/RI37A_R9_173_I5Q_11_08_2016_15_40_19_174_0.avi	962.730	30.0	No focal subject	1	485.703		STATE	785.703	786.228	0.525
RI37A_R9_173_I5Q_11_08_2016_15_40_19_174	2019-09-16 19:14:56	E:/Aggression Videos/Bailey1/RI37A_R9_173_I5Q_11_08_2016_15_40_19_174_0.avi	962.730	30.0	No focal subject	6	488.527		STATE	788.527	791.944	3.417
RI37A_R9_173_I5Q_11_08_2016_15_40_19_174	2019-09-16 19:14:56	E:/Aggression Videos/Bailey1/RI37A_R9_173_I5Q_11_08_2016_15_40_19_174_0.avi	962.730	30.0	No focal subject	4	492.444		STATE	792.444	794.244	1.800
RI37A_R9_173_I5Q_11_08_2016_15_40_19_174	2019-09-16 19:14:56	E:/Aggression Videos/Bailey1/RI37A_R9_173_I5Q_11_08_2016_15_40_19_174_0.avi	962.730	30.0	No focal subject	1	496.219		STATE	796.219	798.894	2.675
RI37A_R9_173_I5Q_11_08_2016_15_40_19_174	2019-09-16 19:14:56	E:/Aggression Videos/Bailey1/RI37A_R9_173_I5Q_11_08_2016_15_40_19_174_0.avi	962.730	30.0	No focal subject	6	501.493		STATE	801.493	810.494	9.001
RI37A_R9_173_I5Q_11_08_2016_15_40_19_174	2019-09-16 19:14:56	E:/Aggression Videos/Bailey1/RI37A_R9_173_I5Q_11_08_2016_15_40_19_174_0.avi	962.730	30.0	No focal subject	3	513.303		STATE	813.303	813.578	0.275
RI37A_R9_173_I5Q_11_08_2016_15_40_19_174	2019-09-16 19:14:56	E:/Aggression Videos/Bailey1/RI37A_R9_173_I5Q_11_08_2016_15_40_19_174_0.avi	962.730	30.0	No focal subject	4	515.661		STATE	815.661	816.710	1.049
RI37A_R9_173_I5Q_11_08_2016_15_40_19_174	2019-09-16 19:14:56	E:/Aggression Videos/Bailey1/RI37A_R9_173_I5Q_11_08_2016_15_40_19_174_0.avi	962.730	30.0	No focal subject	1	518.794		STATE	818.794	819.902	1.108
RI37A_R9_173_I5Q_11_08_2016_15_40_19_174	2019-09-16 19:14:56	E:/Aggression Videos/Bailey1/RI37A_R9_173_I5Q_11_08_2016_15_40_19_174_0.avi	962.730	30.0	No focal subject	1	525.885		STATE	825.885	827.960	2.075
RI37A_R9_173_I5Q_11_08_2016_15_40_19_174	2019-09-16 19:14:56	E:/Aggression Videos/Bailey1/RI37A_R9_173_I5Q_11_08_2016_15_40_19_174_0.avi	962.730	30.0	No focal subject	7	534.044		STATE	834.044	834.568	0.524
RI37A_R9_173_I5Q_11_08_2016_15_40_19_174	2019-09-16 19:14:56	E:/Aggression Videos/Bailey1/RI37A_R9_173_I5Q_11_08_2016_15_40_19_174_0.avi	962.730	30.0	No focal subject	8	540.386		STATE	840.386	899.944	59.558
RI37A_R9_173_I5Q_11_08_2016_15_40_19_174	2019-09-16 19:14:56	E:/Aggression Videos/Bailey1/RI37A_R9_173_I5Q_11_08_2016_15_40_19_174_0.avi	962.730	30.0	No focal subject	1	549.01		STATE	849.010	854.910	5.900
RI37A_R9_173_I5Q_11_08_2016_15_40_19_174	2019-09-16 19:14:56	E:/Aggression Videos/Bailey1/RI37A_R9_173_I5Q_11_08_2016_15_40_19_174_0.avi	962.730	30.0	No focal subject	1	557.194		STATE	857.194	859.319	2.125
RI37A_R9_173_I5Q_11_08_2016_15_40_19_174	2019-09-16 19:14:56	E:/Aggression Videos/Bailey1/RI37A_R9_173_I5Q_11_08_2016_15_40_19_174_0.avi	962.730	30.0	No focal subject	7	561.919		STATE	861.919	865.368	3.449
RI37A_R9_173_I5Q_11_08_2016_15_40_19_174	2019-09-16 19:14:56	E:/Aggression Videos/Bailey1/RI37A_R9_173_I5Q_11_08_2016_15_40_19_174_0.avi	962.730	30.0	No focal subject	1	570.343		STATE	870.343	872.143	1.800
RI37A_R9_173_I5Q_11_08_2016_15_40_19_174	2019-09-16 19:14:56	E:/Aggression Videos/Bailey1/RI37A_R9_173_I5Q_11_08_2016_15_40_19_174_0.avi	962.730	30.0	No focal subject	2	593.068		STATE	893.068	897.918	4.850
RI37A_R9_173_I5Q_11_08_2016_15_40_19_174	2019-09-16 19:14:56	E:/Aggression Videos/Bailey1/RI37A_R9_173_I5Q_11_08_2016_15_40_19_174_0.avi	962.730	30.0	No focal subject	1	609.493		STATE	909.493	910.993	1.500
RI37A_R9_173_I5Q_11_08_2016_15_40_19_174	2019-09-16 19:14:56	E:/Aggression Videos/Bailey1/RI37A_R9_173_I5Q_11_08_2016_15_40_19_174_0.avi	962.730	30.0	No focal subject	2	615.944		STATE	915.944	917.468	1.524
RI37A_R9_173_I5Q_11_08_2016_15_40_19_174	2019-09-16 19:14:56	E:/Aggression Videos/Bailey1/RI37A_R9_173_I5Q_11_08_2016_15_40_19_174_0.avi	962.730	30.0	No focal subject	6	631.419		STATE	931.419	938.753	7.334
RI37A_R9_173_I5Q_11_08_2016_15_40_19_174	2019-09-16 19:14:56	E:/Aggression Videos/Bailey1/RI37A_R9_173_I5Q_11_08_2016_15_40_19_174_0.avi	962.730	30.0	No focal subject	1	643.564		STATE	943.564	946.390	2.826
RI37A_R9_173_I5Q_11_08_2016_15_40_19_174	2019-09-16 19:14:56	E:/Aggression Videos/Bailey1/RI37A_R9_173_I5Q_11_08_2016_15_40_19_174_0.avi	962.730	30.0	No focal subject	4	650.444		STATE	950.444	952.265	1.821
RI37A_R9_173_I5Q_11_08_2016_15_40_19_174	2019-09-16 19:14:56	E:/Aggression Videos/Bailey1/RI37A_R9_173_I5Q_11_08_2016_15_40_19_174_0.avi	962.730	30.0	No focal subject	1	654.815		STATE	954.815	958.164	3.349

## Sheet: 37B
Observation id	Observation date	Media file	Total length	FPS	Subject	Behavior	Behavioral category	Modifiers	Behavior type	Start (s)	Stop (s)	Duration (s)	Comment start	Comment stop
RI37B_R9_173_I3P_11_29_2016_15_40_19_174	2019-09-16 19:36:58	E:/Aggression Videos/Bailey1/RI37B_R9_173_I3P_11_29_2016_15_40_19_174_0.avi	1093.770	30.0	No focal subject	0	-0.516		POINT	299.643	299.643	NA
RI37B_R9_173_I3P_11_29_2016_15_40_19_174	2019-09-16 19:36:58	E:/Aggression Videos/Bailey1/RI37B_R9_173_I3P_11_29_2016_15_40_19_174_0.avi	1093.770	30.0	No focal subject	2	19.984		STATE	320.143	345.733	25.590
RI37B_R9_173_I3P_11_29_2016_15_40_19_174	2019-09-16 19:36:58	E:/Aggression Videos/Bailey1/RI37B_R9_173_I3P_11_29_2016_15_40_19_174_0.avi	1093.770	30.0	No focal subject	6	46.35		STATE	346.509	362.584	16.075
RI37B_R9_173_I3P_11_29_2016_15_40_19_174	2019-09-16 19:36:58	E:/Aggression Videos/Bailey1/RI37B_R9_173_I3P_11_29_2016_15_40_19_174_0.avi	1093.770	30.0	No focal subject	8	60		STATE	360.159	419.733	59.574
RI37B_R9_173_I3P_11_29_2016_15_40_19_174	2019-09-16 19:36:58	E:/Aggression Videos/Bailey1/RI37B_R9_173_I3P_11_29_2016_15_40_19_174_0.avi	1093.770	30.0	No focal subject	1	68.754		STATE	368.913	369.437	0.524
RI37B_R9_173_I3P_11_29_2016_15_40_19_174	2019-09-16 19:36:58	E:/Aggression Videos/Bailey1/RI37B_R9_173_I3P_11_29_2016_15_40_19_174_0.avi	1093.770	30.0	No focal subject	1	83.404		STATE	383.563	384.063	0.500
RI37B_R9_173_I3P_11_29_2016_15_40_19_174	2019-09-16 19:36:58	E:/Aggression Videos/Bailey1/RI37B_R9_173_I3P_11_29_2016_15_40_19_174_0.avi	1093.770	30.0	No focal subject	2	91.854		STATE	392.013	394.838	2.825
RI37B_R9_173_I3P_11_29_2016_15_40_19_174	2019-09-16 19:36:58	E:/Aggression Videos/Bailey1/RI37B_R9_173_I3P_11_29_2016_15_40_19_174_0.avi	1093.770	30.0	No focal subject	4	96.645		STATE	396.804	398.056	1.252
RI37B_R9_173_I3P_11_29_2016_15_40_19_174	2019-09-16 19:36:58	E:/Aggression Videos/Bailey1/RI37B_R9_173_I3P_11_29_2016_15_40_19_174_0.avi	1093.770	30.0	No focal subject	6	108.796		STATE	408.955	419.630	10.675
RI37B_R9_173_I3P_11_29_2016_15_40_19_174	2019-09-16 19:36:58	E:/Aggression Videos/Bailey1/RI37B_R9_173_I3P_11_29_2016_15_40_19_174_0.avi	1093.770	30.0	No focal subject	4	121.778		STATE	421.937	423.258	1.321
RI37B_R9_173_I3P_11_29_2016_15_40_19_174	2019-09-16 19:36:58	E:/Aggression Videos/Bailey1/RI37B_R9_173_I3P_11_29_2016_15_40_19_174_0.avi	1093.770	30.0	No focal subject	4	126.537		STATE	426.696	429.581	2.885
RI37B_R9_173_I3P_11_29_2016_15_40_19_174	2019-09-16 19:36:58	E:/Aggression Videos/Bailey1/RI37B_R9_173_I3P_11_29_2016_15_40_19_174_0.avi	1093.770	30.0	No focal subject	4	134.234		STATE	434.393	435.192	0.799
RI37B_R9_173_I3P_11_29_2016_15_40_19_174	2019-09-16 19:36:58	E:/Aggression Videos/Bailey1/RI37B_R9_173_I3P_11_29_2016_15_40_19_174_0.avi	1093.770	30.0	No focal subject	1	143.308		STATE	443.467	446.017	2.550
RI37B_R9_173_I3P_11_29_2016_15_40_19_174	2019-09-16 19:36:58	E:/Aggression Videos/Bailey1/RI37B_R9_173_I3P_11_29_2016_15_40_19_174_0.avi	1093.770	30.0	No focal subject	4	149.783		STATE	449.942	452.218	2.276
RI37B_R9_173_I3P_11_29_2016_15_40_19_174	2019-09-16 19:36:58	E:/Aggression Videos/Bailey1/RI37B_R9_173_I3P_11_29_2016_15_40_19_174_0.avi	1093.770	30.0	No focal subject	2	169.223		STATE	469.382	471.433	2.051
RI37B_R9_173_I3P_11_29_2016_15_40_19_174	2019-09-16 19:36:58	E:/Aggression Videos/Bailey1/RI37B_R9_173_I3P_11_29_2016_15_40_19_174_0.avi	1093.770	30.0	No focal subject	6	174.875		STATE	475.034	479.508	4.474
RI37B_R9_173_I3P_11_29_2016_15_40_19_174	2019-09-16 19:36:58	E:/Aggression Videos/Bailey1/RI37B_R9_173_I3P_11_29_2016_15_40_19_174_0.avi	1093.770	30.0	No focal subject	8	179.941		STATE	480.100	539.500	59.400
RI37B_R9_173_I3P_11_29_2016_15_40_19_174	2019-09-16 19:36:58	E:/Aggression Videos/Bailey1/RI37B_R9_173_I3P_11_29_2016_15_40_19_174_0.avi	1093.770	30.0	No focal subject	1	180.166		STATE	480.325	483.674	3.349
RI37B_R9_173_I3P_11_29_2016_15_40_19_174	2019-09-16 19:36:58	E:/Aggression Videos/Bailey1/RI37B_R9_173_I3P_11_29_2016_15_40_19_174_0.avi	1093.770	30.0	No focal subject	1	184.434		STATE	484.593	488.118	3.525
RI37B_R9_173_I3P_11_29_2016_15_40_19_174	2019-09-16 19:36:58	E:/Aggression Videos/Bailey1/RI37B_R9_173_I3P_11_29_2016_15_40_19_174_0.avi	1093.770	30.0	No focal subject	1	196.183		STATE	496.342	503.042	6.700
RI37B_R9_173_I3P_11_29_2016_15_40_19_174	2019-09-16 19:36:58	E:/Aggression Videos/Bailey1/RI37B_R9_173_I3P_11_29_2016_15_40_19_174_0.avi	1093.770	30.0	No focal subject	4	205.583		STATE	505.742	506.492	0.750
RI37B_R9_173_I3P_11_29_2016_15_40_19_174	2019-09-16 19:36:58	E:/Aggression Videos/Bailey1/RI37B_R9_173_I3P_11_29_2016_15_40_19_174_0.avi	1093.770	30.0	No focal subject	1	206.333		STATE	506.492	508.593	2.101
RI37B_R9_173_I3P_11_29_2016_15_40_19_174	2019-09-16 19:36:58	E:/Aggression Videos/Bailey1/RI37B_R9_173_I3P_11_29_2016_15_40_19_174_0.avi	1093.770	30.0	No focal subject	6	219.083		STATE	519.242	526.667	7.425
RI37B_R9_173_I3P_11_29_2016_15_40_19_174	2019-09-16 19:36:58	E:/Aggression Videos/Bailey1/RI37B_R9_173_I3P_11_29_2016_15_40_19_174_0.avi	1093.770	30.0	No focal subject	1	231.958		STATE	532.117	533.868	1.751
RI37B_R9_173_I3P_11_29_2016_15_40_19_174	2019-09-16 19:36:58	E:/Aggression Videos/Bailey1/RI37B_R9_173_I3P_11_29_2016_15_40_19_174_0.avi	1093.770	30.0	No focal subject	8	300.158		STATE	600.317	659.659	59.342
RI37B_R9_173_I3P_11_29_2016_15_40_19_174	2019-09-16 19:36:58	E:/Aggression Videos/Bailey1/RI37B_R9_173_I3P_11_29_2016_15_40_19_174_0.avi	1093.770	30.0	No focal subject	1	330.559		STATE	630.718	630.992	0.274
RI37B_R9_173_I3P_11_29_2016_15_40_19_174	2019-09-16 19:36:58	E:/Aggression Videos/Bailey1/RI37B_R9_173_I3P_11_29_2016_15_40_19_174_0.avi	1093.770	30.0	No focal subject	5	368.1		STATE	668.259	669.309	1.050
RI37B_R9_173_I3P_11_29_2016_15_40_19_174	2019-09-16 19:36:58	E:/Aggression Videos/Bailey1/RI37B_R9_173_I3P_11_29_2016_15_40_19_174_0.avi	1093.770	30.0	No focal subject	1	372.828		STATE	672.987	675.358	2.371
RI37B_R9_173_I3P_11_29_2016_15_40_19_174	2019-09-16 19:36:58	E:/Aggression Videos/Bailey1/RI37B_R9_173_I3P_11_29_2016_15_40_19_174_0.avi	1093.770	30.0	No focal subject	4	391.808		STATE	691.967	692.467	0.500
RI37B_R9_173_I3P_11_29_2016_15_40_19_174	2019-09-16 19:36:58	E:/Aggression Videos/Bailey1/RI37B_R9_173_I3P_11_29_2016_15_40_19_174_0.avi	1093.770	30.0	No focal subject	8	420.041		STATE	720.200	779.519	59.319
RI37B_R9_173_I3P_11_29_2016_15_40_19_174	2019-09-16 19:36:58	E:/Aggression Videos/Bailey1/RI37B_R9_173_I3P_11_29_2016_15_40_19_174_0.avi	1093.770	30.0	No focal subject	2	428.074		STATE	728.233	729.501	1.268
RI37B_R9_173_I3P_11_29_2016_15_40_19_174	2019-09-16 19:36:58	E:/Aggression Videos/Bailey1/RI37B_R9_173_I3P_11_29_2016_15_40_19_174_0.avi	1093.770	30.0	No focal subject	2	433.141		STATE	733.300	733.800	0.500
RI37B_R9_173_I3P_11_29_2016_15_40_19_174	2019-09-16 19:36:58	E:/Aggression Videos/Bailey1/RI37B_R9_173_I3P_11_29_2016_15_40_19_174_0.avi	1093.770	30.0	No focal subject	7	449.499		STATE	749.658	750.959	1.301
RI37B_R9_173_I3P_11_29_2016_15_40_19_174	2019-09-16 19:36:58	E:/Aggression Videos/Bailey1/RI37B_R9_173_I3P_11_29_2016_15_40_19_174_0.avi	1093.770	30.0	No focal subject	6	450.815		STATE	750.974	756.161	5.187
RI37B_R9_173_I3P_11_29_2016_15_40_19_174	2019-09-16 19:36:58	E:/Aggression Videos/Bailey1/RI37B_R9_173_I3P_11_29_2016_15_40_19_174_0.avi	1093.770	30.0	No focal subject	3	456.801		STATE	756.960	757.460	0.500
RI37B_R9_173_I3P_11_29_2016_15_40_19_174	2019-09-16 19:36:58	E:/Aggression Videos/Bailey1/RI37B_R9_173_I3P_11_29_2016_15_40_19_174_0.avi	1093.770	30.0	No focal subject	3	457.801		STATE	757.960	758.985	1.025
RI37B_R9_173_I3P_11_29_2016_15_40_19_174	2019-09-16 19:36:58	E:/Aggression Videos/Bailey1/RI37B_R9_173_I3P_11_29_2016_15_40_19_174_0.avi	1093.770	30.0	No focal subject	1	460.167		STATE	760.326	764.251	3.925
RI37B_R9_173_I3P_11_29_2016_15_40_19_174	2019-09-16 19:36:58	E:/Aggression Videos/Bailey1/RI37B_R9_173_I3P_11_29_2016_15_40_19_174_0.avi	1093.770	30.0	No focal subject	1	465.635		STATE	765.794	766.568	0.774
RI37B_R9_173_I3P_11_29_2016_15_40_19_174	2019-09-16 19:36:58	E:/Aggression Videos/Bailey1/RI37B_R9_173_I3P_11_29_2016_15_40_19_174_0.avi	1093.770	30.0	No focal subject	2	489.813		STATE	789.972	790.474	0.502
RI37B_R9_173_I3P_11_29_2016_15_40_19_174	2019-09-16 19:36:58	E:/Aggression Videos/Bailey1/RI37B_R9_173_I3P_11_29_2016_15_40_19_174_0.avi	1093.770	30.0	No focal subject	2	512.185		STATE	812.344	815.422	3.078
RI37B_R9_173_I3P_11_29_2016_15_40_19_174	2019-09-16 19:36:58	E:/Aggression Videos/Bailey1/RI37B_R9_173_I3P_11_29_2016_15_40_19_174_0.avi	1093.770	30.0	No focal subject	8	540.71		STATE	840.869	900.250	59.381
RI37B_R9_173_I3P_11_29_2016_15_40_19_174	2019-09-16 19:36:58	E:/Aggression Videos/Bailey1/RI37B_R9_173_I3P_11_29_2016_15_40_19_174_0.avi	1093.770	30.0	No focal subject	3	712.966		STATE	1013.125	1014.650	1.525
RI37B_R9_173_I3P_11_29_2016_15_40_19_174	2019-09-16 19:36:58	E:/Aggression Videos/Bailey1/RI37B_R9_173_I3P_11_29_2016_15_40_19_174_0.avi	1093.770	30.0	No focal subject	1	756.295		STATE	1056.454	1057.830	1.376
RI37B_R9_173_I3P_11_29_2016_15_40_19_174	2019-09-16 19:36:58	E:/Aggression Videos/Bailey1/RI37B_R9_173_I3P_11_29_2016_15_40_19_174_0.avi	1093.770	30.0	No focal subject	6	764.792		STATE	1064.951	1066.026	1.075
RI37B_R9_173_I3P_11_29_2016_15_40_19_174	2019-09-16 19:36:58	E:/Aggression Videos/Bailey1/RI37B_R9_173_I3P_11_29_2016_15_40_19_174_0.avi	1093.770	30.0	No focal subject	3	782.324		STATE	1082.483	1082.733	0.250
RI37B_R9_173_I3P_11_29_2016_15_40_19_174	2019-09-16 19:36:58	E:/Aggression Videos/Bailey1/RI37B_R9_173_I3P_11_29_2016_15_40_19_174_0.avi	1093.770	30.0	No focal subject	1	788.408		STATE	1088.567	1089.592	1.025

## Sheet: 42A
Observation id	Observation date	Media file	Total length	FPS	Subject	Behavior	Behavioral category	Modifiers	Behavior type	Start (s)	Stop (s)	Duration (s)	Comment start	Comment stop
RI42A_R9_179_I2S_11_09_2016_15_40_19_174	2019-09-16 20:01:00	E:/Aggression Videos/Bailey1/RI42A_R9_179_I2S_11_09_2016_15_40_19_174_0.avi	1083.430	30.0	No focal subject	0	-1.624		POINT	298.376	298.376	NA
RI42A_R9_179_I2S_11_09_2016_15_40_19_174	2019-09-16 20:01:00	E:/Aggression Videos/Bailey1/RI42A_R9_179_I2S_11_09_2016_15_40_19_174_0.avi	1083.430	30.0	No focal subject	2	6.992		STATE	306.992	330.234	23.242
RI42A_R9_179_I2S_11_09_2016_15_40_19_174	2019-09-16 20:01:00	E:/Aggression Videos/Bailey1/RI42A_R9_179_I2S_11_09_2016_15_40_19_174_0.avi	1083.430	30.0	No focal subject	2	31.767		STATE	331.767	343.810	12.043
RI42A_R9_179_I2S_11_09_2016_15_40_19_174	2019-09-16 20:01:00	E:/Aggression Videos/Bailey1/RI42A_R9_179_I2S_11_09_2016_15_40_19_174_0.avi	1083.430	30.0	No focal subject	2	45.088		STATE	345.088	362.188	17.100
RI42A_R9_179_I2S_11_09_2016_15_40_19_174	2019-09-16 20:01:00	E:/Aggression Videos/Bailey1/RI42A_R9_179_I2S_11_09_2016_15_40_19_174_0.avi	1083.430	30.0	No focal subject	8	62.051		STATE	362.051	421.384	59.333
RI42A_R9_179_I2S_11_09_2016_15_40_19_174	2019-09-16 20:01:00	E:/Aggression Videos/Bailey1/RI42A_R9_179_I2S_11_09_2016_15_40_19_174_0.avi	1083.430	30.0	No focal subject	2	64.268		STATE	364.268	365.792	1.524
RI42A_R9_179_I2S_11_09_2016_15_40_19_174	2019-09-16 20:01:00	E:/Aggression Videos/Bailey1/RI42A_R9_179_I2S_11_09_2016_15_40_19_174_0.avi	1083.430	30.0	No focal subject	2	70.667		STATE	370.667	381.492	10.825
RI42A_R9_179_I2S_11_09_2016_15_40_19_174	2019-09-16 20:01:00	E:/Aggression Videos/Bailey1/RI42A_R9_179_I2S_11_09_2016_15_40_19_174_0.avi	1083.430	30.0	No focal subject	2	87.243		STATE	387.243	396.943	9.700
RI42A_R9_179_I2S_11_09_2016_15_40_19_174	2019-09-16 20:01:00	E:/Aggression Videos/Bailey1/RI42A_R9_179_I2S_11_09_2016_15_40_19_174_0.avi	1083.430	30.0	No focal subject	6	101.443		STATE	401.443	420.218	18.775
RI42A_R9_179_I2S_11_09_2016_15_40_19_174	2019-09-16 20:01:00	E:/Aggression Videos/Bailey1/RI42A_R9_179_I2S_11_09_2016_15_40_19_174_0.avi	1083.430	30.0	No focal subject	2	121.243		STATE	421.243	424.143	2.900
RI42A_R9_179_I2S_11_09_2016_15_40_19_174	2019-09-16 20:01:00	E:/Aggression Videos/Bailey1/RI42A_R9_179_I2S_11_09_2016_15_40_19_174_0.avi	1083.430	30.0	No focal subject	2	134.516		STATE	434.516	438.408	3.892
RI42A_R9_179_I2S_11_09_2016_15_40_19_174	2019-09-16 20:01:00	E:/Aggression Videos/Bailey1/RI42A_R9_179_I2S_11_09_2016_15_40_19_174_0.avi	1083.430	30.0	No focal subject	2	149.712		STATE	449.712	477.688	27.976
RI42A_R9_179_I2S_11_09_2016_15_40_19_174	2019-09-16 20:01:00	E:/Aggression Videos/Bailey1/RI42A_R9_179_I2S_11_09_2016_15_40_19_174_0.avi	1083.430	30.0	No focal subject	8	179.642		STATE	479.642	539.025	59.383
RI42A_R9_179_I2S_11_09_2016_15_40_19_174	2019-09-16 20:01:00	E:/Aggression Videos/Bailey1/RI42A_R9_179_I2S_11_09_2016_15_40_19_174_0.avi	1083.430	30.0	No focal subject	2	187.567		STATE	487.567	490.991	3.424
RI42A_R9_179_I2S_11_09_2016_15_40_19_174	2019-09-16 20:01:00	E:/Aggression Videos/Bailey1/RI42A_R9_179_I2S_11_09_2016_15_40_19_174_0.avi	1083.430	30.0	No focal subject	2	201.817		STATE	501.817	506.442	4.625
RI42A_R9_179_I2S_11_09_2016_15_40_19_174	2019-09-16 20:01:00	E:/Aggression Videos/Bailey1/RI42A_R9_179_I2S_11_09_2016_15_40_19_174_0.avi	1083.430	30.0	No focal subject	2	209.067		STATE	509.067	521.843	12.776
RI42A_R9_179_I2S_11_09_2016_15_40_19_174	2019-09-16 20:01:00	E:/Aggression Videos/Bailey1/RI42A_R9_179_I2S_11_09_2016_15_40_19_174_0.avi	1083.430	30.0	No focal subject	2	228.542		STATE	528.542	541.068	12.526
RI42A_R9_179_I2S_11_09_2016_15_40_19_174	2019-09-16 20:01:00	E:/Aggression Videos/Bailey1/RI42A_R9_179_I2S_11_09_2016_15_40_19_174_0.avi	1083.430	30.0	No focal subject	2	243.642		STATE	543.642	547.468	3.826
RI42A_R9_179_I2S_11_09_2016_15_40_19_174	2019-09-16 20:01:00	E:/Aggression Videos/Bailey1/RI42A_R9_179_I2S_11_09_2016_15_40_19_174_0.avi	1083.430	30.0	No focal subject	2	249.319		STATE	549.319	557.142	7.823
RI42A_R9_179_I2S_11_09_2016_15_40_19_174	2019-09-16 20:01:00	E:/Aggression Videos/Bailey1/RI42A_R9_179_I2S_11_09_2016_15_40_19_174_0.avi	1083.430	30.0	No focal subject	2	261.567		STATE	561.567	574.093	12.526
RI42A_R9_179_I2S_11_09_2016_15_40_19_174	2019-09-16 20:01:00	E:/Aggression Videos/Bailey1/RI42A_R9_179_I2S_11_09_2016_15_40_19_174_0.avi	1083.430	30.0	No focal subject	8	289.183		STATE	589.183	648.386	59.203
RI42A_R9_179_I2S_11_09_2016_15_40_19_174	2019-09-16 20:01:00	E:/Aggression Videos/Bailey1/RI42A_R9_179_I2S_11_09_2016_15_40_19_174_0.avi	1083.430	30.0	No focal subject	1	337.077		STATE	637.077	638.353	1.276
RI42A_R9_179_I2S_11_09_2016_15_40_19_174	2019-09-16 20:01:00	E:/Aggression Videos/Bailey1/RI42A_R9_179_I2S_11_09_2016_15_40_19_174_0.avi	1083.430	30.0	No focal subject	2	348.377		STATE	648.377	649.153	0.776
RI42A_R9_179_I2S_11_09_2016_15_40_19_174	2019-09-16 20:01:00	E:/Aggression Videos/Bailey1/RI42A_R9_179_I2S_11_09_2016_15_40_19_174_0.avi	1083.430	30.0	No focal subject	3	364.243		STATE	664.243	664.743	0.500
RI42A_R9_179_I2S_11_09_2016_15_40_19_174	2019-09-16 20:01:00	E:/Aggression Videos/Bailey1/RI42A_R9_179_I2S_11_09_2016_15_40_19_174_0.avi	1083.430	30.0	No focal subject	3	383.161		STATE	683.161	683.685	0.524
RI42A_R9_179_I2S_11_09_2016_15_40_19_174	2019-09-16 20:01:00	E:/Aggression Videos/Bailey1/RI42A_R9_179_I2S_11_09_2016_15_40_19_174_0.avi	1083.430	30.0	No focal subject	2	392.286		STATE	692.286	698.410	6.124
RI42A_R9_179_I2S_11_09_2016_15_40_19_174	2019-09-16 20:01:00	E:/Aggression Videos/Bailey1/RI42A_R9_179_I2S_11_09_2016_15_40_19_174_0.avi	1083.430	30.0	No focal subject	8	419.819		STATE	719.819	778.902	59.083
RI42A_R9_179_I2S_11_09_2016_15_40_19_174	2019-09-16 20:01:00	E:/Aggression Videos/Bailey1/RI42A_R9_179_I2S_11_09_2016_15_40_19_174_0.avi	1083.430	30.0	No focal subject	2	437.793		STATE	737.793	745.393	7.600
RI42A_R9_179_I2S_11_09_2016_15_40_19_174	2019-09-16 20:01:00	E:/Aggression Videos/Bailey1/RI42A_R9_179_I2S_11_09_2016_15_40_19_174_0.avi	1083.430	30.0	No focal subject	2	450.193		STATE	750.193	756.551	6.358
RI42A_R9_179_I2S_11_09_2016_15_40_19_174	2019-09-16 20:01:00	E:/Aggression Videos/Bailey1/RI42A_R9_179_I2S_11_09_2016_15_40_19_174_0.avi	1083.430	30.0	No focal subject	1	459.627		STATE	759.627	765.353	5.726
RI42A_R9_179_I2S_11_09_2016_15_40_19_174	2019-09-16 20:01:00	E:/Aggression Videos/Bailey1/RI42A_R9_179_I2S_11_09_2016_15_40_19_174_0.avi	1083.430	30.0	No focal subject	2	481.903		STATE	781.903	788.961	7.058
RI42A_R9_179_I2S_11_09_2016_15_40_19_174	2019-09-16 20:01:00	E:/Aggression Videos/Bailey1/RI42A_R9_179_I2S_11_09_2016_15_40_19_174_0.avi	1083.430	30.0	No focal subject	2	532.793		STATE	832.793	836.676	3.883
RI42A_R9_179_I2S_11_09_2016_15_40_19_174	2019-09-16 20:01:00	E:/Aggression Videos/Bailey1/RI42A_R9_179_I2S_11_09_2016_15_40_19_174_0.avi	1083.430	30.0	No focal subject	2	539.326		STATE	839.326	844.276	4.950
RI42A_R9_179_I2S_11_09_2016_15_40_19_174	2019-09-16 20:01:00	E:/Aggression Videos/Bailey1/RI42A_R9_179_I2S_11_09_2016_15_40_19_174_0.avi	1083.430	30.0	No focal subject	8	539.86		STATE	839.860	899.210	59.350
RI42A_R9_179_I2S_11_09_2016_15_40_19_174	2019-09-16 20:01:00	E:/Aggression Videos/Bailey1/RI42A_R9_179_I2S_11_09_2016_15_40_19_174_0.avi	1083.430	30.0	No focal subject	2	550.827		STATE	850.827	851.852	1.025
RI42A_R9_179_I2S_11_09_2016_15_40_19_174	2019-09-16 20:01:00	E:/Aggression Videos/Bailey1/RI42A_R9_179_I2S_11_09_2016_15_40_19_174_0.avi	1083.430	30.0	No focal subject	2	561.756		STATE	861.756	871.218	9.462
RI42A_R9_179_I2S_11_09_2016_15_40_19_174	2019-09-16 20:01:00	E:/Aggression Videos/Bailey1/RI42A_R9_179_I2S_11_09_2016_15_40_19_174_0.avi	1083.430	30.0	No focal subject	6	571.218		STATE	871.218	880.822	9.604
RI42A_R9_179_I2S_11_09_2016_15_40_19_174	2019-09-16 20:01:00	E:/Aggression Videos/Bailey1/RI42A_R9_179_I2S_11_09_2016_15_40_19_174_0.avi	1083.430	30.0	No focal subject	6	586.038		STATE	886.038	917.286	31.248
RI42A_R9_179_I2S_11_09_2016_15_40_19_174	2019-09-16 20:01:00	E:/Aggression Videos/Bailey1/RI42A_R9_179_I2S_11_09_2016_15_40_19_174_0.avi	1083.430	30.0	No focal subject	4	631.603		STATE	931.603	935.011	3.408
RI42A_R9_179_I2S_11_09_2016_15_40_19_174	2019-09-16 20:01:00	E:/Aggression Videos/Bailey1/RI42A_R9_179_I2S_11_09_2016_15_40_19_174_0.avi	1083.430	30.0	No focal subject	6	635.286		STATE	935.286	955.510	20.224
RI42A_R9_179_I2S_11_09_2016_15_40_19_174	2019-09-16 20:01:00	E:/Aggression Videos/Bailey1/RI42A_R9_179_I2S_11_09_2016_15_40_19_174_0.avi	1083.430	30.0	No focal subject	4	658.46		STATE	958.460	961.735	3.275
RI42A_R9_179_I2S_11_09_2016_15_40_19_174	2019-09-16 20:01:00	E:/Aggression Videos/Bailey1/RI42A_R9_179_I2S_11_09_2016_15_40_19_174_0.avi	1083.430	30.0	No focal subject	6	662.485		STATE	962.485	974.559	12.074
RI42A_R9_179_I2S_11_09_2016_15_40_19_174	2019-09-16 20:01:00	E:/Aggression Videos/Bailey1/RI42A_R9_179_I2S_11_09_2016_15_40_19_174_0.avi	1083.430	30.0	No focal subject	4	675.369		STATE	975.369	978.794	3.425
RI42A_R9_179_I2S_11_09_2016_15_40_19_174	2019-09-16 20:01:00	E:/Aggression Videos/Bailey1/RI42A_R9_179_I2S_11_09_2016_15_40_19_174_0.avi	1083.430	30.0	No focal subject	6	679.294		STATE	979.294	983.264	3.970
RI42A_R9_179_I2S_11_09_2016_15_40_19_174	2019-09-16 20:01:00	E:/Aggression Videos/Bailey1/RI42A_R9_179_I2S_11_09_2016_15_40_19_174_0.avi	1083.430	30.0	No focal subject	4	683.279		STATE	983.279	987.168	3.889
RI42A_R9_179_I2S_11_09_2016_15_40_19_174	2019-09-16 20:01:00	E:/Aggression Videos/Bailey1/RI42A_R9_179_I2S_11_09_2016_15_40_19_174_0.avi	1083.430	30.0	No focal subject	1	735.893		STATE	1035.893	1037.193	1.300
RI42A_R9_179_I2S_11_09_2016_15_40_19_174	2019-09-16 20:01:00	E:/Aggression Videos/Bailey1/RI42A_R9_179_I2S_11_09_2016_15_40_19_174_0.avi	1083.430	30.0	No focal subject	2	744.022		STATE	1044.022	1062.572	18.550
RI42A_R9_179_I2S_11_09_2016_15_40_19_174	2019-09-16 20:01:00	E:/Aggression Videos/Bailey1/RI42A_R9_179_I2S_11_09_2016_15_40_19_174_0.avi	1083.430	30.0	No focal subject	2	773.422		STATE	1073.422	1082.525	9.103

[truncated: 11 more sheets: 42B, 42C, 43A, 43B, 43C, 43D, 50A, 50B, 50C, Isa199A, Isa199B]
