# Supplementary material for: Cerebellar Purkinje cell activity modulates aggressive behavior
Source: eLife. 2020 Apr 28;9:e53229. doi: 10.7554/eLife.53229 (PMC7202893; doi:10.7554/eLife.53229)
Supplement: Figure 3—source data 1. [file elife-53229-fig3-data1.xlsx]

## Sheet: Event Count
Behavior counts by Assay															Behavior counts by Animal
	Attack		Social		Grooming		Tail Rattles		Lateral Threat		Chase				Attack		Social		Grooming		Tail Rattles		Lateral Threat		Chase
Light	Off	On	Off	On	Off	On	Off	On	Off	On	Off	On			Off	On	Off	On	Off	On	Off	On	Off	On	Off	On
1B	3	2	10	14	3	5	0	0	0	0	0	0		1B	3	2	10	14	3	5	0	0	0	0	0	0
5A	6	13	10	13	2	0	0	0	7	7	0	0		5A	6.66667	8	8	9.33333	3	2.66667	0.666667	0	6.33333	4.66667	0.333333	0
5B	10	7	8	5	1	7	1	0	9	6	0	0		5B
5C	4	4	6	10	6	1	1	0	3	1	1	0		5C
8B	3	5	8	6	0	7	0	0	1	0	0	0		8B	2	4.33333	9.66667	7.33333	0.666667	5.33333	0.333333	0	0.666667	1	0	0
8C	1	3	13	8	2	2	1	0	1	3	0	0		8C
8D	2	5	8	8	0	7	0	0	0	0	0	0		8D
11D	4	3	4	4	7	8	2	1	2	1	0	0		11D	4	3	4	4	7	8	2	1	2	1	0	0
18A	7	5	3	2	3	8	0	0	1	1	0	0		18A	4.5	3.75	7.25	7.5	4	6.25	0	0	2.75	3.25	0.25	0
18B	5	2	6	8	7	6	0	0	4	5	0	0		18B
18D	2	2	14	15	2	1	0	0	2	0	0	0		18D
18E	4	6	6	5	4	10	0	0	4	7	1	0		18E
19A	9	10	7	10	3	4	0	0	8	3	0	0		19A	4.66667	7	6.33333	7	7.66667	4.33333	0	0.333333	4	2.66667	0	0
19C	2	3	8	9	7	4	0	1	3	0	0	0		19C
19E	3	8	4	2	13	5	0	0	1	5	0	0		19E
21B	2	8	6	2	1	4	2	1	1	0	0	0		21B	2.5	5	6	2.5	2.5	5.5	1	1	0.5	0	0	0
21E	3	2	6	3	4	7	0	1	0	0	0	0		21E
31C	4	5	16	11	4	6	0	0	1	2	0	0		31C	3	7.5	12.5	7.5	5.5	5.5	0	0	1.5	6	0	2
31E	2	10	9	4	7	5	0	0	2	10	0	4		31E
32D	5	4	9	9	4	6	0	0	2	0	0	0		32D	4	4.5	9.5	8.5	5	5.5	0	0.5	2.5	0	0	0.5
32E	3	5	10	8	6	5	0	1	3	0	0	1		32E
Isa195A	2	3	17	7	1	5	0	0	0	0	0	0		Isa195A	2	3	17	7	1	5	0	0	0	0	0	0
Isa196A	1	4	9	8	4	6	1	1	0	0	0	0		Isa196A	4	5	12.75	8.25	6	4.5	0.25	0.25	1.25	1.5	0	0
Isa196B	5	5	6	6	2	2	0	0	0	0	0	0		Isa196B
Isa196C	8	9	16	10	7	5	0	0	5	4	0	0		Isa196C
Isa196D	2	2	20	9	11	5	0	0	0	2	0	0		Isa196D
R6(A6)	5	8	7	0	0	7	0	0	0	1	0	0		R6(A6)	5.5	8.5	5	0	2	7.5	0	0.5	0	0.5	0	0
R6(A12)	6	9	3	0	4	8	0	1	0	0	0	0		R6(A12)
7_13(A20)	7	5	1	0	6	4	2	1	3	2	0	1		7_13(A20)	6.5	5.5	1	0	5.5	8.5	1.5	2	4	1.5	0	0.5
7_13(A34)	6	6	1	0	5	13	1	3	5	1	0	0		7_13(A34)
7_18(A24)	1	7	10	8	0	4	1	0	0	2	0	0		7_18(A24)	3	8.5	7.5	5.5	3	8.5	1	0	2	2.5	0	0
7_18(A35)	5	10	5	3	6	13	1	0	4	3	0	0		7_18(A35)
7_20(A26)	7	9	4	1	5	11	0	0	7	7	0	1		7_20(A26)	6.5	8	3.5	1	9.5	11.5	0	0.5	5	4	0	0.5
7_20(A36)	6	7	3	1	14	12	0	1	3	1	0	0		7_20(A36)
	4.26471	5.76471	8.02941	6.14706	4.44118	5.97059	0.382353	0.352941	2.41176	2.17647	0.0588235	0.205882			4.12222	5.57222	8	5.96111	4.35556	6.23889	0.45	0.405556	2.16667	1.90556	0.0388889	0.233333
	0.403436	0.492472	0.783617	0.724086	0.594375	0.548024	0.111821	0.110761	0.432869	0.459541	0.0409594	0.125098			0.411626	0.566297	1.05713	0.995654	0.653413	0.567114	0.166627	0.145675	0.502441	0.487873	0.0268085	0.136858
	0.00324332		0.00334894		0.0368484		0.812469		0.573462		0.281768				0.0132401		0.0330266		0.0125192		0.740587		0.556548		0.198436
		Avg	SEM	Mouse1	Mouse2	Mouse3	Mouse4	Mouse5	Mouse6	Mouse7	Mouse8	Mouse9	Mouse10	Mouse11	Mouse12	Mouse13	Mouse14	Mouse15
Attack	Off	4.12222	0.411626	3	6.66667	2	4	4.5	4.66667	2.5	3	4	2	4	5.5	6.5	3	6.5
	On	5.57222	0.566297	2	8	4.33333	3	3.75	7	5	7.5	4.5	3	5	8.5	5.5	8.5	8
Social	Off	8	1.05713	10	8	9.66667	4	7.25	6.33333	6	12.5	9.5	17	12.75	5	1	7.5	3.5
	On	5.96111	0.995654	14	9.33333	7.33333	4	7.5	7	2.5	7.5	8.5	7	8.25	0	0	5.5	1
Grooming	Off	4.35556	0.653413	3	3	0.666667	7	4	7.66667	2.5	5.5	5	1	6	2	5.5	3	9.5
	On	6.23889	0.567114	5	2.66667	5.33333	8	6.25	4.33333	5.5	5.5	5.5	5	4.5	7.5	8.5	8.5	11.5
Tail Rattles	Off	0.45	0.166627	0	0.666667	0.333333	2	0	0	1	0	0	0	0.25	0	1.5	1	0
	On	0.405556	0.145675	0	0	0	1	0	0.333333	1	0	0.5	0	0.25	0.5	2	0	0.5
Lateral Threat	Off	2.16667	0.502441	0	6.33333	0.666667	2	2.75	4	0.5	1.5	2.5	0	1.25	0	4	2	5
	On	1.90556	0.487873	0	4.66667	1	1	3.25	2.66667	0	6	0	0	1.5	0.5	1.5	2.5	4
Chase	Off	0.0388889	0.0268085	0	0.333333	0	0	0.25	0	0	0	0	0	0	0	0	0	0
	On	0.233333	0.136858	0	0	0	0	0	0	0	2	0.5	0	0	0	0.5	0	0.5

## Sheet: Event Duration
Behavior counts by Assay															Behavior counts by Animal
	Attack		Social		Grooming		Tail Rattles		Lateral Threat		Chase				Attack		Social		Grooming		Tail Rattles		Lateral Threat		Chase
Light	Off	On	Off	On	Off	On	Off	On	Off	On	Off	On			Off	On	Off	On	Off	On	Off	On	Off	On	Off	On
1B	27.439	14.613	68.092	57.116	5.2	9.152	0	0	0	0	0	0		1B	27.439	14.613	68.092	57.116	5.2	9.152	0	0	0	0	0	0
5A	19.682	58.046	86.868	79.623	5.425	0	0	0	7.476	11.62	0	0		5A	29.279	46.5635	59.143	47.7997	7.58567	4.163	0.250667	0	15.7203	11.7887	0.283333	0
5B	50.548	35.081	36.037	24.293	3.975	11.914	0.501	0	21.108	21.696	0	0		5B
5C	17.607		54.524	39.483	13.357	0.575	0.251	0	18.577	2.05	0.85	0		5C
8B	12.182	28.148	54.016	21.192	0	34.2	0	0	2.136	0	0	0		8B	8.36	20.0017	57.0457	27.6757	1.1	25.788	0.072	0	1.56167	4.176	0	0
8C	1.316	8.376	56.732	28.935	3.3	7.775	0.216	0	2.549	12.528	0	0		8C
8D	11.582	23.481	60.389	32.9	0	35.389	0	0	0	0	0	0		8D
11D	25.583	7.918	11.074	7.974	24.971	16.345	1.531	0.251	3.068	2.651	0	0		11D	25.583	7.918	11.074	7.974	24.971	16.345	1.531	0.251	3.068	2.651	0	0
18A	96.3	58.965	32.909	10.349	31.774	24.393	0	0	4.55	1.426	0	0		18A	34.2503	29.7642	44.5877	33.0955	13.0932	12.2995	0	0	7.24025	5.09025	0.25025	0
18B	18.54	16.823	32.365	20.728	12.171	6.222	0	0	4.706	8.759	0	0		18B
18D	4.217	4.649	83.493	82.094	2.395	1.949	0	0	3.125	0	0	0		18D
18E	17.944	38.62	29.584	19.211	6.033	16.634	0	0	16.58	10.176	1.001	0		18E
19A	56.9	73.059	72.2	57.299	7.151	19.401	0	0	23.592	6.226	0	0		19A	24.028	46.4137	47.1007	49.3303	29.1147	13.6573	0	0.166667	11.486	8.55733	0	0
19C	6.242	16.374	39.374	79.805	20.012	11.524	0	0.5	9.54	0	0	0		19C
19E	8.942	49.808	29.728	10.887	60.181	10.047	0	0	1.326	19.446	0	0		19E
21B	4.923	30.593	38.706	2.873	0.8	4.151	1.009	0.251	0.8	0	0	0		21B	9.577	18.3545	34.3375	5.0315	3.2695	8.677	0.5045	0.7345	0.4	0	0	0
21E	14.231	6.116	29.969	7.19	5.739	13.203	0	1.218	0	0	0	0		21E
31C	17.384	21.818	52.983	96.976	10.085	13.324	0	0	2.95	4.902	0	0		31C	12.841	41.9635	46.992	56.8115	14.1335	14.2775	0	0	5.0735	18.29	0	1.6955
31E	8.298	62.109	41.001	16.647	18.182	15.231	0	0	7.197	31.678	0	3.391		31E
32D	43.892	23.12	42.079	31.916	12.726	11.549	0	0	3.925	0	0	0		32D	27.8115	23.6575	42.051	24.807	12.526	8.2605	0	0.4	4.81	0	0	0.902
32E	11.731	24.195	42.023	17.698	12.326	4.972	0	0.8	5.695	0	0	1.804		32E
Isa195A	4.562	9.983	61.577	19.564	9	3.704	0	0	0	0	0	0		Isa195A	4.562	9.983	61.577	19.564	9	3.704	0	0	0	0	0	0
Isa196A	0.75	5.596	114.292	45.71	5.345	15.999	0.25	0.75	0	0	0	0		Isa196A	23.7627	15.609	77.7568	31.9553	10.6905	7.72175	0.0625	0.1875	1.52175	2.515	0	0
Isa196B	29.753	5.609	32.994	10.907	16.001	2.906	0	0	0	0	0	0		Isa196B
Isa196C	35.126	26.074	63.53	22.406	7.917	6.998	0	0	6.087	4.311	0	0		Isa196C
Isa196D	29.422	25.157	100.211	48.798	13.499	4.984	0	0	0	5.749	0	0		Isa196D
R6(A6)	36.05	33.877	61.417	0	0	37.38	0	0	0	4.126	0	0		R6(A6)	32.4125	36.284	42.1455	0	2.887	33.441	0	0.262	0	2.063	0	0
R6(A12)	28.775	38.691	22.874	0	5.774	29.502	0	0.524	0	0	0	0		R6(A12)
7_13(A20)	86.102	56.811	5.727	0	14.348	47.852	1.924	0.524	6.163	5.202	0	0.801		7_13(A20)	68.673	53.2825	9.961	0	17.5235	52.952	1.5955	1.718	8.097	3.526	0	0.4005
7_13(A34)	51.244	49.754	14.195	0	20.699	58.052	1.267	2.912	10.031	1.85	0	0		7_13(A34)
7_18(A24)	13.3	81.87	210.787	49.82	0	3.215	1.033	0	0	5.652	0	0		7_18(A24)	22.57	71.9205	135.044	39.5085	8.5	32.121	0.908	0	2.696	7.879	0	0
7_18(A35)	31.84	61.971	59.301	29.197	17	61.027	0.783	0	5.392	10.106	0	0		7_18(A35)
7_20(A26)	77.093	100.59	62.841	12.3	9.723	28.014	0	0	23.881	17.711	0	1.001		7_20(A26)	60.5835	73.0735	61.4705	6.787	16.6935	28.719	0	0.6755	15.661	9.118	0	0.5005
7_20(A36)	44.074	45.557	60.1	1.274	23.664	29.424	0	1.351	7.441	0.525	0	0		7_20(A36)
	27.7522	34.6501	54.8233	28.9754	11.7286	17.559	0.257794	0.267088	5.82044	5.54088	0.0544412	0.205794			27.4488	33.9601	53.2252	27.1637	11.7525	18.0852	0.328278	0.293011	5.1557	5.04362	0.0355722	0.233233
	4.11329	4.24347	6.28172	4.53632	1.99882	2.74283	0.0871047	0.101199	1.20583	1.30267	0.0380418	0.115458			4.54882	5.45714	7.59334	5.2174	2.05354	3.56197	0.145144	0.119803	1.40418	1.35183	0.0242921	0.125038
	0.111763		8.07148e-05		0.0824959		0.933332		0.839452		0.232089				0.189342		0.00218176		0.133814		0.782843		0.929943		0.156329
		Avg	SEM	Mouse1	Mouse2	Mouse3	Mouse4	Mouse5	Mouse6	Mouse7	Mouse8	Mouse9	Mouse10	Mouse11	Mouse12	Mouse13	Mouse14	Mouse15
Attack	Off	4.12222	0.411626	3	6.66667	2	4	4.5	4.66667	2.5	3	4	2	4	5.5	6.5	3	6.5
	On	5.57222	0.566297	2	8	4.33333	3	3.75	7	5	7.5	4.5	3	5	8.5	5.5	8.5	8
Social	Off	8	1.05713	10	8	9.66667	4	7.25	6.33333	6	12.5	9.5	17	12.75	5	1	7.5	3.5
	On	5.96111	0.995654	14	9.33333	7.33333	4	7.5	7	2.5	7.5	8.5	7	8.25	0	0	5.5	1
Grooming	Off	4.35556	0.653413	3	3	0.666667	7	4	7.66667	2.5	5.5	5	1	6	2	5.5	3	9.5
	On	6.23889	0.567114	5	2.66667	5.33333	8	6.25	4.33333	5.5	5.5	5.5	5	4.5	7.5	8.5	8.5	11.5
Tail Rattles	Off	0.45	0.166627	0	0.666667	0.333333	2	0	0	1	0	0	0	0.25	0	1.5	1	0
	On	0.405556	0.145675	0	0	0	1	0	0.333333	1	0	0.5	0	0.25	0.5	2	0	0.5
Lateral Threat	Off	2.16667	0.502441	0	6.33333	0.666667	2	2.75	4	0.5	1.5	2.5	0	1.25	0	4	2	5
	On	1.90556	0.487873	0	4.66667	1	1	3.25	2.66667	0	6	0	0	1.5	0.5	1.5	2.5	4
Chase	Off	0.0388889	0.0268085	0	0.333333	0	0	0.25	0	0	0	0	0	0	0	0	0	0
	On	0.233333	0.136858	0	0	0	0	0	0	0	2	0.5	0	0	0	0.5	0	0.5

## Sheet: Event coding
Assay start	0
Grooming	1
Social	2
Tail Rattles	3
Lateral Threat	4
Chase	5
Attack	6
Light On	8

## Sheet: 1B
Observation id	Observation date	Media file	Total length	FPS	Subject	Behavior	Behavioral category	Modifiers	Behavior type	Start (s)	Stop (s)	Duration (s)	Comment start	Comment stop
RI1B_R9_42_I2A_04_11_2016_15_40_19_174	2019-08-24 10:52:25	E:/Aggression Videos/Bailey2/RI1B_R9_42_I2A_04_11_2016_15_40_19_174_0.avi	1009.800	30.0	No focal subject	0	-0.583		POINT	227.784	227.784	NA
RI1B_R9_42_I2A_04_11_2016_15_40_19_174	2019-08-24 10:52:25	E:/Aggression Videos/Bailey2/RI1B_R9_42_I2A_04_11_2016_15_40_19_174_0.avi	1009.800	30.0	No focal subject	2	4.317		STATE	232.684	254.550	21.866
RI1B_R9_42_I2A_04_11_2016_15_40_19_174	2019-08-24 10:52:25	E:/Aggression Videos/Bailey2/RI1B_R9_42_I2A_04_11_2016_15_40_19_174_0.avi	1009.800	30.0	No focal subject	6	28.543		STATE	256.910	260.226	3.316
RI1B_R9_42_I2A_04_11_2016_15_40_19_174	2019-08-24 10:52:25	E:/Aggression Videos/Bailey2/RI1B_R9_42_I2A_04_11_2016_15_40_19_174_0.avi	1009.800	30.0	No focal subject	6	31.918		STATE	260.285	272.709	12.424
RI1B_R9_42_I2A_04_11_2016_15_40_19_174	2019-08-24 10:52:25	E:/Aggression Videos/Bailey2/RI1B_R9_42_I2A_04_11_2016_15_40_19_174_0.avi	1009.800	30.0	No focal subject	6	47.743		STATE	276.110	287.809	11.699
RI1B_R9_42_I2A_04_11_2016_15_40_19_174	2019-08-24 10:52:25	E:/Aggression Videos/Bailey2/RI1B_R9_42_I2A_04_11_2016_15_40_19_174_0.avi	1009.800	30.0	No focal subject	8	60		STATE	288.367	348.367	60.000
RI1B_R9_42_I2A_04_11_2016_15_40_19_174	2019-08-24 10:52:25	E:/Aggression Videos/Bailey2/RI1B_R9_42_I2A_04_11_2016_15_40_19_174_0.avi	1009.800	30.0	No focal subject	6	60.526		STATE	288.893	295.932	7.039
RI1B_R9_42_I2A_04_11_2016_15_40_19_174	2019-08-24 10:52:25	E:/Aggression Videos/Bailey2/RI1B_R9_42_I2A_04_11_2016_15_40_19_174_0.avi	1009.800	30.0	No focal subject	6	69.843		STATE	298.210	305.784	7.574
RI1B_R9_42_I2A_04_11_2016_15_40_19_174	2019-08-24 10:52:25	E:/Aggression Videos/Bailey2/RI1B_R9_42_I2A_04_11_2016_15_40_19_174_0.avi	1009.800	30.0	No focal subject	1	88.791		STATE	317.158	318.435	1.277
RI1B_R9_42_I2A_04_11_2016_15_40_19_174	2019-08-24 10:52:25	E:/Aggression Videos/Bailey2/RI1B_R9_42_I2A_04_11_2016_15_40_19_174_0.avi	1009.800	30.0	No focal subject	2	90.593		STATE	318.960	320.834	1.874
RI1B_R9_42_I2A_04_11_2016_15_40_19_174	2019-08-24 10:52:25	E:/Aggression Videos/Bailey2/RI1B_R9_42_I2A_04_11_2016_15_40_19_174_0.avi	1009.800	30.0	No focal subject	1	95.634		STATE	324.001	325.576	1.575
RI1B_R9_42_I2A_04_11_2016_15_40_19_174	2019-08-24 10:52:25	E:/Aggression Videos/Bailey2/RI1B_R9_42_I2A_04_11_2016_15_40_19_174_0.avi	1009.800	30.0	No focal subject	2	150.942		STATE	379.309	383.834	4.525
RI1B_R9_42_I2A_04_11_2016_15_40_19_174	2019-08-24 10:52:25	E:/Aggression Videos/Bailey2/RI1B_R9_42_I2A_04_11_2016_15_40_19_174_0.avi	1009.800	30.0	No focal subject	1	171.867		STATE	400.234	400.984	0.750
RI1B_R9_42_I2A_04_11_2016_15_40_19_174	2019-08-24 10:52:25	E:/Aggression Videos/Bailey2/RI1B_R9_42_I2A_04_11_2016_15_40_19_174_0.avi	1009.800	30.0	No focal subject	2	179.566		STATE	407.933	408.458	0.525
RI1B_R9_42_I2A_04_11_2016_15_40_19_174	2019-08-24 10:52:25	E:/Aggression Videos/Bailey2/RI1B_R9_42_I2A_04_11_2016_15_40_19_174_0.avi	1009.800	30.0	No focal subject	8	180.066		STATE	408.433	468.667	60.234
RI1B_R9_42_I2A_04_11_2016_15_40_19_174	2019-08-24 10:52:25	E:/Aggression Videos/Bailey2/RI1B_R9_42_I2A_04_11_2016_15_40_19_174_0.avi	1009.800	30.0	No focal subject	2	188.692		STATE	417.059	422.233	5.174
RI1B_R9_42_I2A_04_11_2016_15_40_19_174	2019-08-24 10:52:25	E:/Aggression Videos/Bailey2/RI1B_R9_42_I2A_04_11_2016_15_40_19_174_0.avi	1009.800	30.0	No focal subject	2	196.416		STATE	424.783	432.709	7.926
RI1B_R9_42_I2A_04_11_2016_15_40_19_174	2019-08-24 10:52:25	E:/Aggression Videos/Bailey2/RI1B_R9_42_I2A_04_11_2016_15_40_19_174_0.avi	1009.800	30.0	No focal subject	2	214.191		STATE	442.558	446.958	4.400
RI1B_R9_42_I2A_04_11_2016_15_40_19_174	2019-08-24 10:52:25	E:/Aggression Videos/Bailey2/RI1B_R9_42_I2A_04_11_2016_15_40_19_174_0.avi	1009.800	30.0	No focal subject	2	220.916		STATE	449.283	460.333	11.050
RI1B_R9_42_I2A_04_11_2016_15_40_19_174	2019-08-24 10:52:25	E:/Aggression Videos/Bailey2/RI1B_R9_42_I2A_04_11_2016_15_40_19_174_0.avi	1009.800	30.0	No focal subject	2	238.893		STATE	467.260	474.859	7.599
RI1B_R9_42_I2A_04_11_2016_15_40_19_174	2019-08-24 10:52:25	E:/Aggression Videos/Bailey2/RI1B_R9_42_I2A_04_11_2016_15_40_19_174_0.avi	1009.800	30.0	No focal subject	2	259.617		STATE	487.984	496.259	8.275
RI1B_R9_42_I2A_04_11_2016_15_40_19_174	2019-08-24 10:52:25	E:/Aggression Videos/Bailey2/RI1B_R9_42_I2A_04_11_2016_15_40_19_174_0.avi	1009.800	30.0	No focal subject	2	279.591		STATE	507.958	511.333	3.375
RI1B_R9_42_I2A_04_11_2016_15_40_19_174	2019-08-24 10:52:25	E:/Aggression Videos/Bailey2/RI1B_R9_42_I2A_04_11_2016_15_40_19_174_0.avi	1009.800	30.0	No focal subject	2	287.117		STATE	515.484	526.434	10.950
RI1B_R9_42_I2A_04_11_2016_15_40_19_174	2019-08-24 10:52:25	E:/Aggression Videos/Bailey2/RI1B_R9_42_I2A_04_11_2016_15_40_19_174_0.avi	1009.800	30.0	No focal subject	1	300.393		STATE	528.760	531.709	2.949
RI1B_R9_42_I2A_04_11_2016_15_40_19_174	2019-08-24 10:52:25	E:/Aggression Videos/Bailey2/RI1B_R9_42_I2A_04_11_2016_15_40_19_174_0.avi	1009.800	30.0	No focal subject	2	309.542		STATE	537.909	538.426	0.517
RI1B_R9_42_I2A_04_11_2016_15_40_19_174	2019-08-24 10:52:25	E:/Aggression Videos/Bailey2/RI1B_R9_42_I2A_04_11_2016_15_40_19_174_0.avi	1009.800	30.0	No focal subject	2	316.084		STATE	544.451	545.726	1.275
RI1B_R9_42_I2A_04_11_2016_15_40_19_174	2019-08-24 10:52:25	E:/Aggression Videos/Bailey2/RI1B_R9_42_I2A_04_11_2016_15_40_19_174_0.avi	1009.800	30.0	No focal subject	1	323.142		STATE	551.509	553.834	2.325
RI1B_R9_42_I2A_04_11_2016_15_40_19_174	2019-08-24 10:52:25	E:/Aggression Videos/Bailey2/RI1B_R9_42_I2A_04_11_2016_15_40_19_174_0.avi	1009.800	30.0	No focal subject	2	347.491		STATE	575.858	580.483	4.625
RI1B_R9_42_I2A_04_11_2016_15_40_19_174	2019-08-24 10:52:25	E:/Aggression Videos/Bailey2/RI1B_R9_42_I2A_04_11_2016_15_40_19_174_0.avi	1009.800	30.0	No focal subject	2	394.089		STATE	622.456	632.908	10.452
RI1B_R9_42_I2A_04_11_2016_15_40_19_174	2019-08-24 10:52:25	E:/Aggression Videos/Bailey2/RI1B_R9_42_I2A_04_11_2016_15_40_19_174_0.avi	1009.800	30.0	No focal subject	1	407.197		STATE	635.564	636.613	1.049
RI1B_R9_42_I2A_04_11_2016_15_40_19_174	2019-08-24 10:52:25	E:/Aggression Videos/Bailey2/RI1B_R9_42_I2A_04_11_2016_15_40_19_174_0.avi	1009.800	30.0	No focal subject	2	412.672		STATE	641.039	646.764	5.725
RI1B_R9_42_I2A_04_11_2016_15_40_19_174	2019-08-24 10:52:25	E:/Aggression Videos/Bailey2/RI1B_R9_42_I2A_04_11_2016_15_40_19_174_0.avi	1009.800	30.0	No focal subject	8	420.133		STATE	648.500	708.467	59.967
RI1B_R9_42_I2A_04_11_2016_15_40_19_174	2019-08-24 10:52:25	E:/Aggression Videos/Bailey2/RI1B_R9_42_I2A_04_11_2016_15_40_19_174_0.avi	1009.800	30.0	No focal subject	2	446.908		STATE	675.275	678.675	3.400
RI1B_R9_42_I2A_04_11_2016_15_40_19_174	2019-08-24 10:52:25	E:/Aggression Videos/Bailey2/RI1B_R9_42_I2A_04_11_2016_15_40_19_174_0.avi	1009.800	30.0	No focal subject	2	459.133		STATE	687.500	691.350	3.850
RI1B_R9_42_I2A_04_11_2016_15_40_19_174	2019-08-24 10:52:25	E:/Aggression Videos/Bailey2/RI1B_R9_42_I2A_04_11_2016_15_40_19_174_0.avi	1009.800	30.0	No focal subject	1	467.799		STATE	696.166	697.192	1.026
RI1B_R9_42_I2A_04_11_2016_15_40_19_174	2019-08-24 10:52:25	E:/Aggression Videos/Bailey2/RI1B_R9_42_I2A_04_11_2016_15_40_19_174_0.avi	1009.800	30.0	No focal subject	2	473.899		STATE	702.266	704.868	2.602
RI1B_R9_42_I2A_04_11_2016_15_40_19_174	2019-08-24 10:52:25	E:/Aggression Videos/Bailey2/RI1B_R9_42_I2A_04_11_2016_15_40_19_174_0.avi	1009.800	30.0	No focal subject	1	485.749		STATE	714.116	717.517	3.401
RI1B_R9_42_I2A_04_11_2016_15_40_19_174	2019-08-24 10:52:25	E:/Aggression Videos/Bailey2/RI1B_R9_42_I2A_04_11_2016_15_40_19_174_0.avi	1009.800	30.0	No focal subject	2	510.925		STATE	739.292	740.567	1.275
RI1B_R9_42_I2A_04_11_2016_15_40_19_174	2019-08-24 10:52:25	E:/Aggression Videos/Bailey2/RI1B_R9_42_I2A_04_11_2016_15_40_19_174_0.avi	1009.800	30.0	No focal subject	2	527.625		STATE	755.992	757.116	1.124
RI1B_R9_42_I2A_04_11_2016_15_40_19_174	2019-08-24 10:52:25	E:/Aggression Videos/Bailey2/RI1B_R9_42_I2A_04_11_2016_15_40_19_174_0.avi	1009.800	30.0	No focal subject	8	540.233		STATE	768.600	828.633	60.033
RI1B_R9_42_I2A_04_11_2016_15_40_19_174	2019-08-24 10:52:25	E:/Aggression Videos/Bailey2/RI1B_R9_42_I2A_04_11_2016_15_40_19_174_0.avi	1009.800	30.0	No focal subject	2	545.034		STATE	773.401	774.825	1.424
RI1B_R9_42_I2A_04_11_2016_15_40_19_174	2019-08-24 10:52:25	E:/Aggression Videos/Bailey2/RI1B_R9_42_I2A_04_11_2016_15_40_19_174_0.avi	1009.800	30.0	No focal subject	2	556.309		STATE	784.676	786.076	1.400
RI1B_R9_42_I2A_04_11_2016_15_40_19_174	2019-08-24 10:52:25	E:/Aggression Videos/Bailey2/RI1B_R9_42_I2A_04_11_2016_15_40_19_174_0.avi	1009.800	30.0	No focal subject	2	648.941		STATE	877.308	890.983	13.675
RI1B_R9_42_I2A_04_11_2016_15_40_19_174	2019-08-24 10:52:25	E:/Aggression Videos/Bailey2/RI1B_R9_42_I2A_04_11_2016_15_40_19_174_0.avi	1009.800	30.0	No focal subject	2	669.531		STATE	897.898	903.867	5.969
RI1B_R9_42_I2A_04_11_2016_15_40_19_174	2019-08-24 10:52:25	E:/Aggression Videos/Bailey2/RI1B_R9_42_I2A_04_11_2016_15_40_19_174_0.avi	1009.800	30.0	No focal subject	2	684.772		STATE	913.139	921.290	8.151
RI1B_R9_42_I2A_04_11_2016_15_40_19_174	2019-08-24 10:52:25	E:/Aggression Videos/Bailey2/RI1B_R9_42_I2A_04_11_2016_15_40_19_174_0.avi	1009.800	30.0	No focal subject	2	696.422		STATE	924.789	936.939	12.150
RI1B_R9_42_I2A_04_11_2016_15_40_19_174	2019-08-24 10:52:25	E:/Aggression Videos/Bailey2/RI1B_R9_42_I2A_04_11_2016_15_40_19_174_0.avi	1009.800	30.0	No focal subject	2	745.747		STATE	974.114	978.939	4.825
RI1B_R9_42_I2A_04_11_2016_15_40_19_174	2019-08-24 10:52:25	E:/Aggression Videos/Bailey2/RI1B_R9_42_I2A_04_11_2016_15_40_19_174_0.avi	1009.800	30.0	No focal subject	1	770.114		STATE	998.481	1000.480	1.999

## Sheet: 5A
Observation id	Observation date	Media file	Total length	FPS	Subject	Behavior	Behavioral category	Modifiers	Behavior type	Start (s)	Stop (s)	Duration (s)	Comment start	Comment stop
RI5A_R9_74_I3C_04_15_2016_15_40_19_174	2019-08-24 21:13:17	E:/Aggression Videos/Bailey2/RI5A_R9_74_I3C_04_15_2016_15_40_19_174_0.avi	1070.530	30.0	No focal subject	0	-1.749		POINT	288.951	288.951	NA
RI5A_R9_74_I3C_04_15_2016_15_40_19_174	2019-08-24 21:13:17	E:/Aggression Videos/Bailey2/RI5A_R9_74_I3C_04_15_2016_15_40_19_174_0.avi	1070.530	30.0	No focal subject	2	10.101		STATE	300.801	305.450	4.649
RI5A_R9_74_I3C_04_15_2016_15_40_19_174	2019-08-24 21:13:17	E:/Aggression Videos/Bailey2/RI5A_R9_74_I3C_04_15_2016_15_40_19_174_0.avi	1070.530	30.0	No focal subject	2	17.576		STATE	308.276	309.043	0.767
RI5A_R9_74_I3C_04_15_2016_15_40_19_174	2019-08-24 21:13:17	E:/Aggression Videos/Bailey2/RI5A_R9_74_I3C_04_15_2016_15_40_19_174_0.avi	1070.530	30.0	No focal subject	2	22.024		STATE	312.724	338.500	25.776
RI5A_R9_74_I3C_04_15_2016_15_40_19_174	2019-08-24 21:13:17	E:/Aggression Videos/Bailey2/RI5A_R9_74_I3C_04_15_2016_15_40_19_174_0.avi	1070.530	30.0	No focal subject	2	49.65		STATE	340.350	358.850	18.500
RI5A_R9_74_I3C_04_15_2016_15_40_19_174	2019-08-24 21:13:17	E:/Aggression Videos/Bailey2/RI5A_R9_74_I3C_04_15_2016_15_40_19_174_0.avi	1070.530	30.0	No focal subject	8	60		STATE	350.700	410.267	59.567
RI5A_R9_74_I3C_04_15_2016_15_40_19_174	2019-08-24 21:13:17	E:/Aggression Videos/Bailey2/RI5A_R9_74_I3C_04_15_2016_15_40_19_174_0.avi	1070.530	30.0	No focal subject	2	75.475		STATE	366.175	368.800	2.625
RI5A_R9_74_I3C_04_15_2016_15_40_19_174	2019-08-24 21:13:17	E:/Aggression Videos/Bailey2/RI5A_R9_74_I3C_04_15_2016_15_40_19_174_0.avi	1070.530	30.0	No focal subject	2	79.151		STATE	369.851	377.025	7.174
RI5A_R9_74_I3C_04_15_2016_15_40_19_174	2019-08-24 21:13:17	E:/Aggression Videos/Bailey2/RI5A_R9_74_I3C_04_15_2016_15_40_19_174_0.avi	1070.530	30.0	No focal subject	2	88.401		STATE	379.101	381.450	2.349
RI5A_R9_74_I3C_04_15_2016_15_40_19_174	2019-08-24 21:13:17	E:/Aggression Videos/Bailey2/RI5A_R9_74_I3C_04_15_2016_15_40_19_174_0.avi	1070.530	30.0	No focal subject	2	96.201		STATE	386.901	397.225	10.324
RI5A_R9_74_I3C_04_15_2016_15_40_19_174	2019-08-24 21:13:17	E:/Aggression Videos/Bailey2/RI5A_R9_74_I3C_04_15_2016_15_40_19_174_0.avi	1070.530	30.0	No focal subject	2	107.8		STATE	398.500	405.827	7.327
RI5A_R9_74_I3C_04_15_2016_15_40_19_174	2019-08-24 21:13:17	E:/Aggression Videos/Bailey2/RI5A_R9_74_I3C_04_15_2016_15_40_19_174_0.avi	1070.530	30.0	No focal subject	2	115.651		STATE	406.351	425.458	19.107
RI5A_R9_74_I3C_04_15_2016_15_40_19_174	2019-08-24 21:13:17	E:/Aggression Videos/Bailey2/RI5A_R9_74_I3C_04_15_2016_15_40_19_174_0.avi	1070.530	30.0	No focal subject	2	140.083		STATE	430.783	436.218	5.435
RI5A_R9_74_I3C_04_15_2016_15_40_19_174	2019-08-24 21:13:17	E:/Aggression Videos/Bailey2/RI5A_R9_74_I3C_04_15_2016_15_40_19_174_0.avi	1070.530	30.0	No focal subject	6	147.068		STATE	437.768	444.494	6.726
RI5A_R9_74_I3C_04_15_2016_15_40_19_174	2019-08-24 21:13:17	E:/Aggression Videos/Bailey2/RI5A_R9_74_I3C_04_15_2016_15_40_19_174_0.avi	1070.530	30.0	No focal subject	4	154.593		STATE	445.293	446.043	0.750
RI5A_R9_74_I3C_04_15_2016_15_40_19_174	2019-08-24 21:13:17	E:/Aggression Videos/Bailey2/RI5A_R9_74_I3C_04_15_2016_15_40_19_174_0.avi	1070.530	30.0	No focal subject	6	155.343		STATE	446.043	448.750	2.707
RI5A_R9_74_I3C_04_15_2016_15_40_19_174	2019-08-24 21:13:17	E:/Aggression Videos/Bailey2/RI5A_R9_74_I3C_04_15_2016_15_40_19_174_0.avi	1070.530	30.0	No focal subject	6	161		STATE	451.700	456.533	4.833
RI5A_R9_74_I3C_04_15_2016_15_40_19_174	2019-08-24 21:13:17	E:/Aggression Videos/Bailey2/RI5A_R9_74_I3C_04_15_2016_15_40_19_174_0.avi	1070.530	30.0	No focal subject	6	166.623		STATE	457.323	459.615	2.292
RI5A_R9_74_I3C_04_15_2016_15_40_19_174	2019-08-24 21:13:17	E:/Aggression Videos/Bailey2/RI5A_R9_74_I3C_04_15_2016_15_40_19_174_0.avi	1070.530	30.0	No focal subject	4	175.766		STATE	466.466	468.799	2.333
RI5A_R9_74_I3C_04_15_2016_15_40_19_174	2019-08-24 21:13:17	E:/Aggression Videos/Bailey2/RI5A_R9_74_I3C_04_15_2016_15_40_19_174_0.avi	1070.530	30.0	No focal subject	6	178.649		STATE	469.349	471.149	1.800
RI5A_R9_74_I3C_04_15_2016_15_40_19_174	2019-08-24 21:13:17	E:/Aggression Videos/Bailey2/RI5A_R9_74_I3C_04_15_2016_15_40_19_174_0.avi	1070.530	30.0	No focal subject	8	179.4		STATE	470.100	530.233	60.133
RI5A_R9_74_I3C_04_15_2016_15_40_19_174	2019-08-24 21:13:17	E:/Aggression Videos/Bailey2/RI5A_R9_74_I3C_04_15_2016_15_40_19_174_0.avi	1070.530	30.0	No focal subject	6	181.973		STATE	472.673	474.249	1.576
RI5A_R9_74_I3C_04_15_2016_15_40_19_174	2019-08-24 21:13:17	E:/Aggression Videos/Bailey2/RI5A_R9_74_I3C_04_15_2016_15_40_19_174_0.avi	1070.530	30.0	No focal subject	4	184.855		STATE	475.555	477.173	1.618
RI5A_R9_74_I3C_04_15_2016_15_40_19_174	2019-08-24 21:13:17	E:/Aggression Videos/Bailey2/RI5A_R9_74_I3C_04_15_2016_15_40_19_174_0.avi	1070.530	30.0	No focal subject	4	190.658		STATE	481.358	482.158	0.800
RI5A_R9_74_I3C_04_15_2016_15_40_19_174	2019-08-24 21:13:17	E:/Aggression Videos/Bailey2/RI5A_R9_74_I3C_04_15_2016_15_40_19_174_0.avi	1070.530	30.0	No focal subject	6	193.007		STATE	483.707	487.007	3.300
RI5A_R9_74_I3C_04_15_2016_15_40_19_174	2019-08-24 21:13:17	E:/Aggression Videos/Bailey2/RI5A_R9_74_I3C_04_15_2016_15_40_19_174_0.avi	1070.530	30.0	No focal subject	4	198.226		STATE	488.926	489.476	0.550
RI5A_R9_74_I3C_04_15_2016_15_40_19_174	2019-08-24 21:13:17	E:/Aggression Videos/Bailey2/RI5A_R9_74_I3C_04_15_2016_15_40_19_174_0.avi	1070.530	30.0	No focal subject	7	202.517		STATE	493.217	494.218	1.001
RI5A_R9_74_I3C_04_15_2016_15_40_19_174	2019-08-24 21:13:17	E:/Aggression Videos/Bailey2/RI5A_R9_74_I3C_04_15_2016_15_40_19_174_0.avi	1070.530	30.0	No focal subject	6	206.543		STATE	497.243	500.568	3.325
RI5A_R9_74_I3C_04_15_2016_15_40_19_174	2019-08-24 21:13:17	E:/Aggression Videos/Bailey2/RI5A_R9_74_I3C_04_15_2016_15_40_19_174_0.avi	1070.530	30.0	No focal subject	6	211.393		STATE	502.093	503.418	1.325
RI5A_R9_74_I3C_04_15_2016_15_40_19_174	2019-08-24 21:13:17	E:/Aggression Videos/Bailey2/RI5A_R9_74_I3C_04_15_2016_15_40_19_174_0.avi	1070.530	30.0	No focal subject	6	217.567		STATE	508.267	511.142	2.875
RI5A_R9_74_I3C_04_15_2016_15_40_19_174	2019-08-24 21:13:17	E:/Aggression Videos/Bailey2/RI5A_R9_74_I3C_04_15_2016_15_40_19_174_0.avi	1070.530	30.0	No focal subject	2	235.993		STATE	526.693	533.868	7.175
RI5A_R9_74_I3C_04_15_2016_15_40_19_174	2019-08-24 21:13:17	E:/Aggression Videos/Bailey2/RI5A_R9_74_I3C_04_15_2016_15_40_19_174_0.avi	1070.530	30.0	No focal subject	4	246.426		STATE	537.126	537.901	0.775
RI5A_R9_74_I3C_04_15_2016_15_40_19_174	2019-08-24 21:13:17	E:/Aggression Videos/Bailey2/RI5A_R9_74_I3C_04_15_2016_15_40_19_174_0.avi	1070.530	30.0	No focal subject	4	249.925		STATE	540.625	541.401	0.776
RI5A_R9_74_I3C_04_15_2016_15_40_19_174	2019-08-24 21:13:17	E:/Aggression Videos/Bailey2/RI5A_R9_74_I3C_04_15_2016_15_40_19_174_0.avi	1070.530	30.0	No focal subject	1	251.226		STATE	541.926	542.450	0.524
RI5A_R9_74_I3C_04_15_2016_15_40_19_174	2019-08-24 21:13:17	E:/Aggression Videos/Bailey2/RI5A_R9_74_I3C_04_15_2016_15_40_19_174_0.avi	1070.530	30.0	No focal subject	4	253.154		STATE	543.854	544.629	0.775
RI5A_R9_74_I3C_04_15_2016_15_40_19_174	2019-08-24 21:13:17	E:/Aggression Videos/Bailey2/RI5A_R9_74_I3C_04_15_2016_15_40_19_174_0.avi	1070.530	30.0	No focal subject	2	264.804		STATE	555.504	563.003	7.499
RI5A_R9_74_I3C_04_15_2016_15_40_19_174	2019-08-24 21:13:17	E:/Aggression Videos/Bailey2/RI5A_R9_74_I3C_04_15_2016_15_40_19_174_0.avi	1070.530	30.0	No focal subject	2	294.919		STATE	585.619	592.408	6.789
RI5A_R9_74_I3C_04_15_2016_15_40_19_174	2019-08-24 21:13:17	E:/Aggression Videos/Bailey2/RI5A_R9_74_I3C_04_15_2016_15_40_19_174_0.avi	1070.530	30.0	No focal subject	8	299.667		STATE	590.367	650.467	60.100
RI5A_R9_74_I3C_04_15_2016_15_40_19_174	2019-08-24 21:13:17	E:/Aggression Videos/Bailey2/RI5A_R9_74_I3C_04_15_2016_15_40_19_174_0.avi	1070.530	30.0	No focal subject	2	314.933		STATE	605.633	611.858	6.225
RI5A_R9_74_I3C_04_15_2016_15_40_19_174	2019-08-24 21:13:17	E:/Aggression Videos/Bailey2/RI5A_R9_74_I3C_04_15_2016_15_40_19_174_0.avi	1070.530	30.0	No focal subject	2	324.758		STATE	615.458	617.758	2.300
RI5A_R9_74_I3C_04_15_2016_15_40_19_174	2019-08-24 21:13:17	E:/Aggression Videos/Bailey2/RI5A_R9_74_I3C_04_15_2016_15_40_19_174_0.avi	1070.530	30.0	No focal subject	6	335.858		STATE	626.558	629.801	3.243
RI5A_R9_74_I3C_04_15_2016_15_40_19_174	2019-08-24 21:13:17	E:/Aggression Videos/Bailey2/RI5A_R9_74_I3C_04_15_2016_15_40_19_174_0.avi	1070.530	30.0	No focal subject	4	341.476		STATE	632.176	637.466	5.290
RI5A_R9_74_I3C_04_15_2016_15_40_19_174	2019-08-24 21:13:17	E:/Aggression Videos/Bailey2/RI5A_R9_74_I3C_04_15_2016_15_40_19_174_0.avi	1070.530	30.0	No focal subject	4	351.102		STATE	641.802	642.576	0.774
RI5A_R9_74_I3C_04_15_2016_15_40_19_174	2019-08-24 21:13:17	E:/Aggression Videos/Bailey2/RI5A_R9_74_I3C_04_15_2016_15_40_19_174_0.avi	1070.530	30.0	No focal subject	6	355.522		STATE	646.222	650.943	4.721
RI5A_R9_74_I3C_04_15_2016_15_40_19_174	2019-08-24 21:13:17	E:/Aggression Videos/Bailey2/RI5A_R9_74_I3C_04_15_2016_15_40_19_174_0.avi	1070.530	30.0	No focal subject	4	361.108		STATE	651.808	652.600	0.792
RI5A_R9_74_I3C_04_15_2016_15_40_19_174	2019-08-24 21:13:17	E:/Aggression Videos/Bailey2/RI5A_R9_74_I3C_04_15_2016_15_40_19_174_0.avi	1070.530	30.0	No focal subject	4	377.391		STATE	668.091	669.366	1.275
RI5A_R9_74_I3C_04_15_2016_15_40_19_174	2019-08-24 21:13:17	E:/Aggression Videos/Bailey2/RI5A_R9_74_I3C_04_15_2016_15_40_19_174_0.avi	1070.530	30.0	No focal subject	2	386.501		STATE	677.201	679.554	2.353
RI5A_R9_74_I3C_04_15_2016_15_40_19_174	2019-08-24 21:13:17	E:/Aggression Videos/Bailey2/RI5A_R9_74_I3C_04_15_2016_15_40_19_174_0.avi	1070.530	30.0	No focal subject	2	407.15		STATE	697.850	711.700	13.850
RI5A_R9_74_I3C_04_15_2016_15_40_19_174	2019-08-24 21:13:17	E:/Aggression Videos/Bailey2/RI5A_R9_74_I3C_04_15_2016_15_40_19_174_0.avi	1070.530	30.0	No focal subject	8	419.7		STATE	710.400	770.400	60.000
RI5A_R9_74_I3C_04_15_2016_15_40_19_174	2019-08-24 21:13:17	E:/Aggression Videos/Bailey2/RI5A_R9_74_I3C_04_15_2016_15_40_19_174_0.avi	1070.530	30.0	No focal subject	2	424.076		STATE	714.776	724.354	9.578
RI5A_R9_74_I3C_04_15_2016_15_40_19_174	2019-08-24 21:13:17	E:/Aggression Videos/Bailey2/RI5A_R9_74_I3C_04_15_2016_15_40_19_174_0.avi	1070.530	30.0	No focal subject	6	446.626		STATE	737.326	743.601	6.275
RI5A_R9_74_I3C_04_15_2016_15_40_19_174	2019-08-24 21:13:17	E:/Aggression Videos/Bailey2/RI5A_R9_74_I3C_04_15_2016_15_40_19_174_0.avi	1070.530	30.0	No focal subject	4	453.95		STATE	744.650	745.451	0.801
RI5A_R9_74_I3C_04_15_2016_15_40_19_174	2019-08-24 21:13:17	E:/Aggression Videos/Bailey2/RI5A_R9_74_I3C_04_15_2016_15_40_19_174_0.avi	1070.530	30.0	No focal subject	6	458.271		STATE	748.971	751.392	2.421
RI5A_R9_74_I3C_04_15_2016_15_40_19_174	2019-08-24 21:13:17	E:/Aggression Videos/Bailey2/RI5A_R9_74_I3C_04_15_2016_15_40_19_174_0.avi	1070.530	30.0	No focal subject	6	464.617		STATE	755.317	765.533	10.216
RI5A_R9_74_I3C_04_15_2016_15_40_19_174	2019-08-24 21:13:17	E:/Aggression Videos/Bailey2/RI5A_R9_74_I3C_04_15_2016_15_40_19_174_0.avi	1070.530	30.0	No focal subject	2	475.883		STATE	766.583	768.365	1.782
RI5A_R9_74_I3C_04_15_2016_15_40_19_174	2019-08-24 21:13:17	E:/Aggression Videos/Bailey2/RI5A_R9_74_I3C_04_15_2016_15_40_19_174_0.avi	1070.530	30.0	No focal subject	6	485.826		STATE	776.526	777.850	1.324
RI5A_R9_74_I3C_04_15_2016_15_40_19_174	2019-08-24 21:13:17	E:/Aggression Videos/Bailey2/RI5A_R9_74_I3C_04_15_2016_15_40_19_174_0.avi	1070.530	30.0	No focal subject	1	520.65		STATE	811.350	816.251	4.901
RI5A_R9_74_I3C_04_15_2016_15_40_19_174	2019-08-24 21:13:17	E:/Aggression Videos/Bailey2/RI5A_R9_74_I3C_04_15_2016_15_40_19_174_0.avi	1070.530	30.0	No focal subject	2	533.251		STATE	823.951	825.201	1.250
RI5A_R9_74_I3C_04_15_2016_15_40_19_174	2019-08-24 21:13:17	E:/Aggression Videos/Bailey2/RI5A_R9_74_I3C_04_15_2016_15_40_19_174_0.avi	1070.530	30.0	No focal subject	8	539.733		STATE	830.433	890.533	60.100
RI5A_R9_74_I3C_04_15_2016_15_40_19_174	2019-08-24 21:13:17	E:/Aggression Videos/Bailey2/RI5A_R9_74_I3C_04_15_2016_15_40_19_174_0.avi	1070.530	30.0	No focal subject	2	540.784		STATE	831.484	832.016	0.532
RI5A_R9_74_I3C_04_15_2016_15_40_19_174	2019-08-24 21:13:17	E:/Aggression Videos/Bailey2/RI5A_R9_74_I3C_04_15_2016_15_40_19_174_0.avi	1070.530	30.0	No focal subject	2	554.541		STATE	845.241	848.366	3.125
RI5A_R9_74_I3C_04_15_2016_15_40_19_174	2019-08-24 21:13:17	E:/Aggression Videos/Bailey2/RI5A_R9_74_I3C_04_15_2016_15_40_19_174_0.avi	1070.530	30.0	No focal subject	6	567.317		STATE	858.017	863.026	5.009
RI5A_R9_74_I3C_04_15_2016_15_40_19_174	2019-08-24 21:13:17	E:/Aggression Videos/Bailey2/RI5A_R9_74_I3C_04_15_2016_15_40_19_174_0.avi	1070.530	30.0	No focal subject	6	575.484		STATE	866.184	870.668	4.484
RI5A_R9_74_I3C_04_15_2016_15_40_19_174	2019-08-24 21:13:17	E:/Aggression Videos/Bailey2/RI5A_R9_74_I3C_04_15_2016_15_40_19_174_0.avi	1070.530	30.0	No focal subject	4	580.08		STATE	870.780	872.567	1.787
RI5A_R9_74_I3C_04_15_2016_15_40_19_174	2019-08-24 21:13:17	E:/Aggression Videos/Bailey2/RI5A_R9_74_I3C_04_15_2016_15_40_19_174_0.avi	1070.530	30.0	No focal subject	6	587.116		STATE	877.816	887.092	9.276
RI5A_R9_74_I3C_04_15_2016_15_40_19_174	2019-08-24 21:13:17	E:/Aggression Videos/Bailey2/RI5A_R9_74_I3C_04_15_2016_15_40_19_174_0.avi	1070.530	30.0	No focal subject	1	606.71		STATE	897.410	903.934	6.524
RI5A_R9_74_I3C_04_15_2016_15_40_19_174	2019-08-24 21:13:17	E:/Aggression Videos/Bailey2/RI5A_R9_74_I3C_04_15_2016_15_40_19_174_0.avi	1070.530	30.0	No focal subject	2	622.533		STATE	913.233	914.308	1.075
RI5A_R9_74_I3C_04_15_2016_15_40_19_174	2019-08-24 21:13:17	E:/Aggression Videos/Bailey2/RI5A_R9_74_I3C_04_15_2016_15_40_19_174_0.avi	1070.530	30.0	No focal subject	1	650.966		STATE	941.666	942.692	1.026
RI5A_R9_74_I3C_04_15_2016_15_40_19_174	2019-08-24 21:13:17	E:/Aggression Videos/Bailey2/RI5A_R9_74_I3C_04_15_2016_15_40_19_174_0.avi	1070.530	30.0	No focal subject	1	657.466		STATE	948.166	953.416	5.250
RI5A_R9_74_I3C_04_15_2016_15_40_19_174	2019-08-24 21:13:17	E:/Aggression Videos/Bailey2/RI5A_R9_74_I3C_04_15_2016_15_40_19_174_0.avi	1070.530	30.0	No focal subject	2	673.342		STATE	964.042	967.192	3.150
RI5A_R9_74_I3C_04_15_2016_15_40_19_174	2019-08-24 21:13:17	E:/Aggression Videos/Bailey2/RI5A_R9_74_I3C_04_15_2016_15_40_19_174_0.avi	1070.530	30.0	No focal subject	1	688.967		STATE	979.667	980.441	0.774
RI5A_R9_74_I3C_04_15_2016_15_40_19_174	2019-08-24 21:13:17	E:/Aggression Videos/Bailey2/RI5A_R9_74_I3C_04_15_2016_15_40_19_174_0.avi	1070.530	30.0	No focal subject	1	704.041		STATE	994.741	996.591	1.850
RI5A_R9_74_I3C_04_15_2016_15_40_19_174	2019-08-24 21:13:17	E:/Aggression Videos/Bailey2/RI5A_R9_74_I3C_04_15_2016_15_40_19_174_0.avi	1070.530	30.0	No focal subject	1	708.092		STATE	998.792	1007.892	9.100
RI5A_R9_74_I3C_04_15_2016_15_40_19_174	2019-08-24 21:13:17	E:/Aggression Videos/Bailey2/RI5A_R9_74_I3C_04_15_2016_15_40_19_174_0.avi	1070.530	30.0	No focal subject	1	722.534		STATE	1013.234	1014.509	1.275
RI5A_R9_74_I3C_04_15_2016_15_40_19_174	2019-08-24 21:13:17	E:/Aggression Videos/Bailey2/RI5A_R9_74_I3C_04_15_2016_15_40_19_174_0.avi	1070.530	30.0	No focal subject	1	724.675		STATE	1015.375	1019.016	3.641
RI5A_R9_74_I3C_04_15_2016_15_40_19_174	2019-08-24 21:13:17	E:/Aggression Videos/Bailey2/RI5A_R9_74_I3C_04_15_2016_15_40_19_174_0.avi	1070.530	30.0	No focal subject	2	728.316		STATE	1019.016	1022.841	3.825
RI5A_R9_74_I3C_04_15_2016_15_40_19_174	2019-08-24 21:13:17	E:/Aggression Videos/Bailey2/RI5A_R9_74_I3C_04_15_2016_15_40_19_174_0.avi	1070.530	30.0	No focal subject	2	766.491		STATE	1057.191	1058.691	1.500

## Sheet: 5B
Observation id	Observation date	Media file	Total length	FPS	Subject	Behavior	Behavioral category	Modifiers	Behavior type	Start (s)	Stop (s)	Duration (s)	Comment start	Comment stop
RI5B_R9_74_I1B_04_22_2016_15_40_19_174	2019-08-25 10:26:05	E:/Aggression Videos/Bailey2/RI5B_R9_74_I1B_04_22_2016_15_40_19_174_0.avi	1075.170	30.0	No focal subject	0	-0.598		POINT	293.135	293.135	NA	0:04:53.135000
RI5B_R9_74_I1B_04_22_2016_15_40_19_174	2019-08-25 10:26:05	E:/Aggression Videos/Bailey2/RI5B_R9_74_I1B_04_22_2016_15_40_19_174_0.avi	1075.170	30.0	No focal subject	2	20.327		STATE	314.060	327.293	13.233	0:05:14.060000
RI5B_R9_74_I1B_04_22_2016_15_40_19_174	2019-08-25 10:26:05	E:/Aggression Videos/Bailey2/RI5B_R9_74_I1B_04_22_2016_15_40_19_174_0.avi	1075.170	30.0	No focal subject	6	34.81		STATE	328.543	335.193	6.650	0:05:28.543000
RI5B_R9_74_I1B_04_22_2016_15_40_19_174	2019-08-25 10:26:05	E:/Aggression Videos/Bailey2/RI5B_R9_74_I1B_04_22_2016_15_40_19_174_0.avi	1075.170	30.0	No focal subject	2	44.56		STATE	338.293	345.993	7.700	0:05:38.293000
RI5B_R9_74_I1B_04_22_2016_15_40_19_174	2019-08-25 10:26:05	E:/Aggression Videos/Bailey2/RI5B_R9_74_I1B_04_22_2016_15_40_19_174_0.avi	1075.170	30.0	No focal subject	2	57.059		STATE	350.792	356.243	5.451	0:05:50.792000
RI5B_R9_74_I1B_04_22_2016_15_40_19_174	2019-08-25 10:26:05	E:/Aggression Videos/Bailey2/RI5B_R9_74_I1B_04_22_2016_15_40_19_174_0.avi	1075.170	30.0	No focal subject	8	60		STATE	353.733	413.700	59.967	0:05:53.733000
RI5B_R9_74_I1B_04_22_2016_15_40_19_174	2019-08-25 10:26:05	E:/Aggression Videos/Bailey2/RI5B_R9_74_I1B_04_22_2016_15_40_19_174_0.avi	1075.170	30.0	No focal subject	2	75.776		STATE	369.509	373.126	3.617	0:06:09.509000
RI5B_R9_74_I1B_04_22_2016_15_40_19_174	2019-08-25 10:26:05	E:/Aggression Videos/Bailey2/RI5B_R9_74_I1B_04_22_2016_15_40_19_174_0.avi	1075.170	30.0	No focal subject	6	81.768		STATE	375.501	378.150	2.649	0:06:15.501000
RI5B_R9_74_I1B_04_22_2016_15_40_19_174	2019-08-25 10:26:05	E:/Aggression Videos/Bailey2/RI5B_R9_74_I1B_04_22_2016_15_40_19_174_0.avi	1075.170	30.0	No focal subject	4	86.86		STATE	380.593	383.717	3.124	0:06:20.593000
RI5B_R9_74_I1B_04_22_2016_15_40_19_174	2019-08-25 10:26:05	E:/Aggression Videos/Bailey2/RI5B_R9_74_I1B_04_22_2016_15_40_19_174_0.avi	1075.170	30.0	No focal subject	6	97.26		STATE	390.993	398.643	7.650	0:06:30.993000
RI5B_R9_74_I1B_04_22_2016_15_40_19_174	2019-08-25 10:26:05	E:/Aggression Videos/Bailey2/RI5B_R9_74_I1B_04_22_2016_15_40_19_174_0.avi	1075.170	30.0	No focal subject	4	111.664		STATE	405.397	406.948	1.551	0:06:45.397000
RI5B_R9_74_I1B_04_22_2016_15_40_19_174	2019-08-25 10:26:05	E:/Aggression Videos/Bailey2/RI5B_R9_74_I1B_04_22_2016_15_40_19_174_0.avi	1075.170	30.0	No focal subject	7	124.86		STATE	418.593	420.392	1.799	0:06:58.593000
RI5B_R9_74_I1B_04_22_2016_15_40_19_174	2019-08-25 10:26:05	E:/Aggression Videos/Bailey2/RI5B_R9_74_I1B_04_22_2016_15_40_19_174_0.avi	1075.170	30.0	No focal subject	6	129.164		STATE	422.897	427.543	4.646	0:07:02.897000
RI5B_R9_74_I1B_04_22_2016_15_40_19_174	2019-08-25 10:26:05	E:/Aggression Videos/Bailey2/RI5B_R9_74_I1B_04_22_2016_15_40_19_174_0.avi	1075.170	30.0	No focal subject	6	136.697		STATE	430.430	434.101	3.671	0:07:10.430000
RI5B_R9_74_I1B_04_22_2016_15_40_19_174	2019-08-25 10:26:05	E:/Aggression Videos/Bailey2/RI5B_R9_74_I1B_04_22_2016_15_40_19_174_0.avi	1075.170	30.0	No focal subject	4	140.384		STATE	434.117	435.150	1.033	0:07:14.117000
RI5B_R9_74_I1B_04_22_2016_15_40_19_174	2019-08-25 10:26:05	E:/Aggression Videos/Bailey2/RI5B_R9_74_I1B_04_22_2016_15_40_19_174_0.avi	1075.170	30.0	No focal subject	6	141.918		STATE	435.651	438.650	2.999	0:07:15.651000
RI5B_R9_74_I1B_04_22_2016_15_40_19_174	2019-08-25 10:26:05	E:/Aggression Videos/Bailey2/RI5B_R9_74_I1B_04_22_2016_15_40_19_174_0.avi	1075.170	30.0	No focal subject	3	146.85		STATE	440.583	441.084	0.501	0:07:20.583000
RI5B_R9_74_I1B_04_22_2016_15_40_19_174	2019-08-25 10:26:05	E:/Aggression Videos/Bailey2/RI5B_R9_74_I1B_04_22_2016_15_40_19_174_0.avi	1075.170	30.0	No focal subject	6	150.651		STATE	444.384	447.184	2.800	0:07:24.384000
RI5B_R9_74_I1B_04_22_2016_15_40_19_174	2019-08-25 10:26:05	E:/Aggression Videos/Bailey2/RI5B_R9_74_I1B_04_22_2016_15_40_19_174_0.avi	1075.170	30.0	No focal subject	4	171.131		STATE	464.864	466.433	1.569	0:07:44.864000
RI5B_R9_74_I1B_04_22_2016_15_40_19_174	2019-08-25 10:26:05	E:/Aggression Videos/Bailey2/RI5B_R9_74_I1B_04_22_2016_15_40_19_174_0.avi	1075.170	30.0	No focal subject	6	172.951		STATE	466.684	470.333	3.649	0:07:46.684000
RI5B_R9_74_I1B_04_22_2016_15_40_19_174	2019-08-25 10:26:05	E:/Aggression Videos/Bailey2/RI5B_R9_74_I1B_04_22_2016_15_40_19_174_0.avi	1075.170	30.0	No focal subject	2	178.375		STATE	472.108	473.383	1.275	0:07:52.108000
RI5B_R9_74_I1B_04_22_2016_15_40_19_174	2019-08-25 10:26:05	E:/Aggression Videos/Bailey2/RI5B_R9_74_I1B_04_22_2016_15_40_19_174_0.avi	1075.170	30.0	No focal subject	8	179.867		STATE	473.600	533.833	60.233	0:07:53.600000
RI5B_R9_74_I1B_04_22_2016_15_40_19_174	2019-08-25 10:26:05	E:/Aggression Videos/Bailey2/RI5B_R9_74_I1B_04_22_2016_15_40_19_174_0.avi	1075.170	30.0	No focal subject	1	184.467		STATE	478.200	480.500	2.300	0:07:58.200000
RI5B_R9_74_I1B_04_22_2016_15_40_19_174	2019-08-25 10:26:05	E:/Aggression Videos/Bailey2/RI5B_R9_74_I1B_04_22_2016_15_40_19_174_0.avi	1075.170	30.0	No focal subject	1	191.577		STATE	485.310	487.350	2.040	0:08:05.310000
RI5B_R9_74_I1B_04_22_2016_15_40_19_174	2019-08-25 10:26:05	E:/Aggression Videos/Bailey2/RI5B_R9_74_I1B_04_22_2016_15_40_19_174_0.avi	1075.170	30.0	No focal subject	2	195.401		STATE	489.134	490.734	1.600	0:08:09.134000
RI5B_R9_74_I1B_04_22_2016_15_40_19_174	2019-08-25 10:26:05	E:/Aggression Videos/Bailey2/RI5B_R9_74_I1B_04_22_2016_15_40_19_174_0.avi	1075.170	30.0	No focal subject	6	200.701		STATE	494.434	505.659	11.225	0:08:14.434000
RI5B_R9_74_I1B_04_22_2016_15_40_19_174	2019-08-25 10:26:05	E:/Aggression Videos/Bailey2/RI5B_R9_74_I1B_04_22_2016_15_40_19_174_0.avi	1075.170	30.0	No focal subject	1	217.151		STATE	510.884	512.159	1.275	0:08:30.884000
RI5B_R9_74_I1B_04_22_2016_15_40_19_174	2019-08-25 10:26:05	E:/Aggression Videos/Bailey2/RI5B_R9_74_I1B_04_22_2016_15_40_19_174_0.avi	1075.170	30.0	No focal subject	2	221.707		STATE	515.440	520.359	4.919	0:08:35.440000
RI5B_R9_74_I1B_04_22_2016_15_40_19_174	2019-08-25 10:26:05	E:/Aggression Videos/Bailey2/RI5B_R9_74_I1B_04_22_2016_15_40_19_174_0.avi	1075.170	30.0	No focal subject	1	232.742		STATE	526.475	528.250	1.775	0:08:46.475000
RI5B_R9_74_I1B_04_22_2016_15_40_19_174	2019-08-25 10:26:05	E:/Aggression Videos/Bailey2/RI5B_R9_74_I1B_04_22_2016_15_40_19_174_0.avi	1075.170	30.0	No focal subject	2	239.092		STATE	532.825	534.850	2.025	0:08:52.825000
RI5B_R9_74_I1B_04_22_2016_15_40_19_174	2019-08-25 10:26:05	E:/Aggression Videos/Bailey2/RI5B_R9_74_I1B_04_22_2016_15_40_19_174_0.avi	1075.170	30.0	No focal subject	2	261.825		STATE	555.558	555.858	0.300	0:09:15.558000
RI5B_R9_74_I1B_04_22_2016_15_40_19_174	2019-08-25 10:26:05	E:/Aggression Videos/Bailey2/RI5B_R9_74_I1B_04_22_2016_15_40_19_174_0.avi	1075.170	30.0	No focal subject	6	263.853		STATE	557.586	574.517	16.931	0:09:17.586000
RI5B_R9_74_I1B_04_22_2016_15_40_19_174	2019-08-25 10:26:05	E:/Aggression Videos/Bailey2/RI5B_R9_74_I1B_04_22_2016_15_40_19_174_0.avi	1075.170	30.0	No focal subject	4	281.084		STATE	574.817	576.218	1.401	0:09:34.817000
RI5B_R9_74_I1B_04_22_2016_15_40_19_174	2019-08-25 10:26:05	E:/Aggression Videos/Bailey2/RI5B_R9_74_I1B_04_22_2016_15_40_19_174_0.avi	1075.170	30.0	No focal subject	4	284.119		STATE	577.852	580.005	2.153	0:09:37.852000
RI5B_R9_74_I1B_04_22_2016_15_40_19_174	2019-08-25 10:26:05	E:/Aggression Videos/Bailey2/RI5B_R9_74_I1B_04_22_2016_15_40_19_174_0.avi	1075.170	30.0	No focal subject	6	286.567		STATE	580.300	583.426	3.126	0:09:40.300000
RI5B_R9_74_I1B_04_22_2016_15_40_19_174	2019-08-25 10:26:05	E:/Aggression Videos/Bailey2/RI5B_R9_74_I1B_04_22_2016_15_40_19_174_0.avi	1075.170	30.0	No focal subject	4	290.118		STATE	583.851	586.826	2.975	0:09:43.851000
RI5B_R9_74_I1B_04_22_2016_15_40_19_174	2019-08-25 10:26:05	E:/Aggression Videos/Bailey2/RI5B_R9_74_I1B_04_22_2016_15_40_19_174_0.avi	1075.170	30.0	No focal subject	2	297.135		STATE	590.868	592.043	1.175	0:09:50.868000
RI5B_R9_74_I1B_04_22_2016_15_40_19_174	2019-08-25 10:26:05	E:/Aggression Videos/Bailey2/RI5B_R9_74_I1B_04_22_2016_15_40_19_174_0.avi	1075.170	30.0	No focal subject	8	300.067		STATE	593.800	653.900	60.100	0:09:53.800000
RI5B_R9_74_I1B_04_22_2016_15_40_19_174	2019-08-25 10:26:05	E:/Aggression Videos/Bailey2/RI5B_R9_74_I1B_04_22_2016_15_40_19_174_0.avi	1075.170	30.0	No focal subject	6	304.842		STATE	598.575	605.830	7.255	0:09:58.575000
RI5B_R9_74_I1B_04_22_2016_15_40_19_174	2019-08-25 10:26:05	E:/Aggression Videos/Bailey2/RI5B_R9_74_I1B_04_22_2016_15_40_19_174_0.avi	1075.170	30.0	No focal subject	4	315.326		STATE	609.059	612.508	3.449	0:10:09.059000
RI5B_R9_74_I1B_04_22_2016_15_40_19_174	2019-08-25 10:26:05	E:/Aggression Videos/Bailey2/RI5B_R9_74_I1B_04_22_2016_15_40_19_174_0.avi	1075.170	30.0	No focal subject	2	327.217		STATE	620.950	633.082	12.132	0:10:20.950000
RI5B_R9_74_I1B_04_22_2016_15_40_19_174	2019-08-25 10:26:05	E:/Aggression Videos/Bailey2/RI5B_R9_74_I1B_04_22_2016_15_40_19_174_0.avi	1075.170	30.0	No focal subject	1	341.048		STATE	634.781	635.331	0.550	0:10:34.781000
RI5B_R9_74_I1B_04_22_2016_15_40_19_174	2019-08-25 10:26:05	E:/Aggression Videos/Bailey2/RI5B_R9_74_I1B_04_22_2016_15_40_19_174_0.avi	1075.170	30.0	No focal subject	4	348.988		STATE	642.721	647.895	5.174	0:10:42.721000
RI5B_R9_74_I1B_04_22_2016_15_40_19_174	2019-08-25 10:26:05	E:/Aggression Videos/Bailey2/RI5B_R9_74_I1B_04_22_2016_15_40_19_174_0.avi	1075.170	30.0	No focal subject	6	355.279		STATE	649.012	650.988	1.976	0:10:49.012000
RI5B_R9_74_I1B_04_22_2016_15_40_19_174	2019-08-25 10:26:05	E:/Aggression Videos/Bailey2/RI5B_R9_74_I1B_04_22_2016_15_40_19_174_0.avi	1075.170	30.0	No focal subject	1	385.618		STATE	679.351	683.326	3.975	0:11:19.351000
RI5B_R9_74_I1B_04_22_2016_15_40_19_174	2019-08-25 10:26:05	E:/Aggression Videos/Bailey2/RI5B_R9_74_I1B_04_22_2016_15_40_19_174_0.avi	1075.170	30.0	No focal subject	4	401.725		STATE	695.458	698.784	3.326	0:11:35.458000
RI5B_R9_74_I1B_04_22_2016_15_40_19_174	2019-08-25 10:26:05	E:/Aggression Videos/Bailey2/RI5B_R9_74_I1B_04_22_2016_15_40_19_174_0.avi	1075.170	30.0	No focal subject	4	407.092		STATE	700.825	704.051	3.226	0:11:40.825000
RI5B_R9_74_I1B_04_22_2016_15_40_19_174	2019-08-25 10:26:05	E:/Aggression Videos/Bailey2/RI5B_R9_74_I1B_04_22_2016_15_40_19_174_0.avi	1075.170	30.0	No focal subject	8	420.067		STATE	713.800	773.933	60.133	0:11:53.800000
RI5B_R9_74_I1B_04_22_2016_15_40_19_174	2019-08-25 10:26:05	E:/Aggression Videos/Bailey2/RI5B_R9_74_I1B_04_22_2016_15_40_19_174_0.avi	1075.170	30.0	No focal subject	1	453.393		STATE	747.126	749.425	2.299	0:12:27.126000
RI5B_R9_74_I1B_04_22_2016_15_40_19_174	2019-08-25 10:26:05	E:/Aggression Videos/Bailey2/RI5B_R9_74_I1B_04_22_2016_15_40_19_174_0.avi	1075.170	30.0	No focal subject	2	505.791		STATE	799.524	804.401	4.877	0:13:19.524000
RI5B_R9_74_I1B_04_22_2016_15_40_19_174	2019-08-25 10:26:05	E:/Aggression Videos/Bailey2/RI5B_R9_74_I1B_04_22_2016_15_40_19_174_0.avi	1075.170	30.0	No focal subject	2	519.492		STATE	813.225	815.251	2.026	0:13:33.225000
RI5B_R9_74_I1B_04_22_2016_15_40_19_174	2019-08-25 10:26:05	E:/Aggression Videos/Bailey2/RI5B_R9_74_I1B_04_22_2016_15_40_19_174_0.avi	1075.170	30.0	No focal subject	6	521.816		STATE	815.549	817.259	1.710	0:13:35.549000
RI5B_R9_74_I1B_04_22_2016_15_40_19_174	2019-08-25 10:26:05	E:/Aggression Videos/Bailey2/RI5B_R9_74_I1B_04_22_2016_15_40_19_174_0.avi	1075.170	30.0	No focal subject	4	524.101		STATE	817.834	821.235	3.401	0:13:37.834000
RI5B_R9_74_I1B_04_22_2016_15_40_19_174	2019-08-25 10:26:05	E:/Aggression Videos/Bailey2/RI5B_R9_74_I1B_04_22_2016_15_40_19_174_0.avi	1075.170	30.0	No focal subject	6	528.327		STATE	822.060	826.426	4.366	0:13:42.060000
RI5B_R9_74_I1B_04_22_2016_15_40_19_174	2019-08-25 10:26:05	E:/Aggression Videos/Bailey2/RI5B_R9_74_I1B_04_22_2016_15_40_19_174_0.avi	1075.170	30.0	No focal subject	4	536.093		STATE	829.826	831.850	2.024	0:13:49.826000
RI5B_R9_74_I1B_04_22_2016_15_40_19_174	2019-08-25 10:26:05	E:/Aggression Videos/Bailey2/RI5B_R9_74_I1B_04_22_2016_15_40_19_174_0.avi	1075.170	30.0	No focal subject	8	540.234		STATE	833.967	893.900	59.933	0:13:53.967000
RI5B_R9_74_I1B_04_22_2016_15_40_19_174	2019-08-25 10:26:05	E:/Aggression Videos/Bailey2/RI5B_R9_74_I1B_04_22_2016_15_40_19_174_0.avi	1075.170	30.0	No focal subject	6	544.034		STATE	837.767	839.191	1.424	0:13:57.767000
RI5B_R9_74_I1B_04_22_2016_15_40_19_174	2019-08-25 10:26:05	E:/Aggression Videos/Bailey2/RI5B_R9_74_I1B_04_22_2016_15_40_19_174_0.avi	1075.170	30.0	No focal subject	6	549.16		STATE	842.893	845.795	2.902	0:14:02.893000
RI5B_R9_74_I1B_04_22_2016_15_40_19_174	2019-08-25 10:26:05	E:/Aggression Videos/Bailey2/RI5B_R9_74_I1B_04_22_2016_15_40_19_174_0.avi	1075.170	30.0	No focal subject	4	552.359		STATE	846.092	848.667	2.575	0:14:06.092000
RI5B_R9_74_I1B_04_22_2016_15_40_19_174	2019-08-25 10:26:05	E:/Aggression Videos/Bailey2/RI5B_R9_74_I1B_04_22_2016_15_40_19_174_0.avi	1075.170	30.0	No focal subject	4	559.595		STATE	853.328	859.151	5.823	0:14:13.328000
RI5B_R9_74_I1B_04_22_2016_15_40_19_174	2019-08-25 10:26:05	E:/Aggression Videos/Bailey2/RI5B_R9_74_I1B_04_22_2016_15_40_19_174_0.avi	1075.170	30.0	No focal subject	1	575.293		STATE	869.026	870.701	1.675	0:14:29.026000
RI5B_R9_74_I1B_04_22_2016_15_40_19_174	2019-08-25 10:26:05	E:/Aggression Videos/Bailey2/RI5B_R9_74_I1B_04_22_2016_15_40_19_174_0.avi	1075.170	30.0	No focal subject	6	624.844		STATE	918.577	922.767	4.190	0:15:18.577000
RI5B_R9_74_I1B_04_22_2016_15_40_19_174	2019-08-25 10:26:05	E:/Aggression Videos/Bailey2/RI5B_R9_74_I1B_04_22_2016_15_40_19_174_0.avi	1075.170	30.0	No focal subject	4	632.601		STATE	926.334	928.358	2.024	0:15:26.334000
RI5B_R9_74_I1B_04_22_2016_15_40_19_174	2019-08-25 10:26:05	E:/Aggression Videos/Bailey2/RI5B_R9_74_I1B_04_22_2016_15_40_19_174_0.avi	1075.170	30.0	No focal subject	1	659.67		STATE	953.403	963.175	9.772	0:15:53.403000
RI5B_R9_74_I1B_04_22_2016_15_40_19_174	2019-08-25 10:26:05	E:/Aggression Videos/Bailey2/RI5B_R9_74_I1B_04_22_2016_15_40_19_174_0.avi	1075.170	30.0	No focal subject	1	686.367		STATE	980.100	981.226	1.126	0:16:20.100000
RI5B_R9_74_I1B_04_22_2016_15_40_19_174	2019-08-25 10:26:05	E:/Aggression Videos/Bailey2/RI5B_R9_74_I1B_04_22_2016_15_40_19_174_0.avi	1075.170	30.0	No focal subject	1	730.285		STATE	1024.018	1026.292	2.274	0:17:04.018000
RI5B_R9_74_I1B_04_22_2016_15_40_19_174	2019-08-25 10:26:05	E:/Aggression Videos/Bailey2/RI5B_R9_74_I1B_04_22_2016_15_40_19_174_0.avi	1075.170	30.0	No focal subject	1	737.733		STATE	1031.466	1036.793	5.327	0:17:11.466000

## Sheet: 5C
Observation id	Observation date	Media file	Total length	FPS	Subject	Behavior	Behavioral category	Modifiers	Behavior type	Start (s)	Stop (s)	Duration (s)	Comment start	Comment stop
RI5C_R9_74_I1J_07_13_2016_15_40_19_174	2019-08-26 18:57:31	E:/Aggression Videos/Bailey2/RI5C_R9_74_I1J_07_13_2016_15_40_19_174_0.avi	1080.470	30.0	No focal subject	0	4.169		POINT	302.702	302.702	NA	0:05:02.702000
RI5C_R9_74_I1J_07_13_2016_15_40_19_174	2019-08-26 18:57:31	E:/Aggression Videos/Bailey2/RI5C_R9_74_I1J_07_13_2016_15_40_19_174_0.avi	1080.470	30.0	No focal subject	2	18.242		STATE	316.775	322.901	6.126	0:05:16.775000
RI5C_R9_74_I1J_07_13_2016_15_40_19_174	2019-08-26 18:57:31	E:/Aggression Videos/Bailey2/RI5C_R9_74_I1J_07_13_2016_15_40_19_174_0.avi	1080.470	30.0	No focal subject	2	25.918		STATE	324.451	345.567	21.116	0:05:24.451000
RI5C_R9_74_I1J_07_13_2016_15_40_19_174	2019-08-26 18:57:31	E:/Aggression Videos/Bailey2/RI5C_R9_74_I1J_07_13_2016_15_40_19_174_0.avi	1080.470	30.0	No focal subject	2	48.451		STATE	346.984	367.984	21.000	0:05:46.984000
RI5C_R9_74_I1J_07_13_2016_15_40_19_174	2019-08-26 18:57:31	E:/Aggression Videos/Bailey2/RI5C_R9_74_I1J_07_13_2016_15_40_19_174_0.avi	1080.470	30.0	No focal subject	8	60		STATE	358.533	420.167	61.634	0:05:58.533000
						6	64							Skyler added, because the face bite looks like the one counted at 13:52
RI5C_R9_74_I1J_07_13_2016_15_40_19_174	2019-08-26 18:57:31	E:/Aggression Videos/Bailey2/RI5C_R9_74_I1J_07_13_2016_15_40_19_174_0.avi	1080.470	30.0	No focal subject	2	75.359		STATE	373.892	376.218	2.326	0:06:13.892000
RI5C_R9_74_I1J_07_13_2016_15_40_19_174	2019-08-26 18:57:31	E:/Aggression Videos/Bailey2/RI5C_R9_74_I1J_07_13_2016_15_40_19_174_0.avi	1080.470	30.0	No focal subject	6	80.742		STATE	379.275	381.050	1.775	0:06:19.275000
RI5C_R9_74_I1J_07_13_2016_15_40_19_174	2019-08-26 18:57:31	E:/Aggression Videos/Bailey2/RI5C_R9_74_I1J_07_13_2016_15_40_19_174_0.avi	1080.470	30.0	No focal subject	2	91.46		STATE	389.993	393.142	3.149	0:06:29.993000
RI5C_R9_74_I1J_07_13_2016_15_40_19_174	2019-08-26 18:57:31	E:/Aggression Videos/Bailey2/RI5C_R9_74_I1J_07_13_2016_15_40_19_174_0.avi	1080.470	30.0	No focal subject	2	101.86		STATE	400.393	409.393	9.000	0:06:40.393000
RI5C_R9_74_I1J_07_13_2016_15_40_19_174	2019-08-26 18:57:31	E:/Aggression Videos/Bailey2/RI5C_R9_74_I1J_07_13_2016_15_40_19_174_0.avi	1080.470	30.0	No focal subject	4	147.376		STATE	445.909	451.009	5.100	0:07:25.909000
RI5C_R9_74_I1J_07_13_2016_15_40_19_174	2019-08-26 18:57:31	E:/Aggression Videos/Bailey2/RI5C_R9_74_I1J_07_13_2016_15_40_19_174_0.avi	1080.470	30.0	No focal subject	6	156.625		STATE	455.158	459.483	4.325	0:07:35.158000
RI5C_R9_74_I1J_07_13_2016_15_40_19_174	2019-08-26 18:57:31	E:/Aggression Videos/Bailey2/RI5C_R9_74_I1J_07_13_2016_15_40_19_174_0.avi	1080.470	30.0	No focal subject	3	161.234		STATE	459.767	460.018	0.251	0:07:39.767000
RI5C_R9_74_I1J_07_13_2016_15_40_19_174	2019-08-26 18:57:31	E:/Aggression Videos/Bailey2/RI5C_R9_74_I1J_07_13_2016_15_40_19_174_0.avi	1080.470	30.0	No focal subject	1	165.743		STATE	464.276	465.625	1.349	0:07:44.276000
RI5C_R9_74_I1J_07_13_2016_15_40_19_174	2019-08-26 18:57:31	E:/Aggression Videos/Bailey2/RI5C_R9_74_I1J_07_13_2016_15_40_19_174_0.avi	1080.470	30.0	No focal subject	2	179.893		STATE	478.426	479.976	1.550	0:07:58.426000
RI5C_R9_74_I1J_07_13_2016_15_40_19_174	2019-08-26 18:57:31	E:/Aggression Videos/Bailey2/RI5C_R9_74_I1J_07_13_2016_15_40_19_174_0.avi	1080.470	30.0	No focal subject	8	181.267		STATE	479.800	540.068	60.268	0:07:59.800000
RI5C_R9_74_I1J_07_13_2016_15_40_19_174	2019-08-26 18:57:31	E:/Aggression Videos/Bailey2/RI5C_R9_74_I1J_07_13_2016_15_40_19_174_0.avi	1080.470	30.0	No focal subject	2	186.418		STATE	484.951	488.351	3.400	0:08:04.951000
RI5C_R9_74_I1J_07_13_2016_15_40_19_174	2019-08-26 18:57:31	E:/Aggression Videos/Bailey2/RI5C_R9_74_I1J_07_13_2016_15_40_19_174_0.avi	1080.470	30.0	No focal subject	6	215.742		STATE	514.275	520.301	6.026	0:08:34.275000
RI5C_R9_74_I1J_07_13_2016_15_40_19_174	2019-08-26 18:57:31	E:/Aggression Videos/Bailey2/RI5C_R9_74_I1J_07_13_2016_15_40_19_174_0.avi	1080.470	30.0	No focal subject	6	231.118		STATE	529.651	533.483	3.832	0:08:49.651000
RI5C_R9_74_I1J_07_13_2016_15_40_19_174	2019-08-26 18:57:31	E:/Aggression Videos/Bailey2/RI5C_R9_74_I1J_07_13_2016_15_40_19_174_0.avi	1080.470	30.0	No focal subject	4	235.8		STATE	534.333	536.383	2.050	0:08:54.333000
RI5C_R9_74_I1J_07_13_2016_15_40_19_174	2019-08-26 18:57:31	E:/Aggression Videos/Bailey2/RI5C_R9_74_I1J_07_13_2016_15_40_19_174_0.avi	1080.470	30.0	No focal subject	2	239.685		STATE	538.218	539.018	0.800	0:08:58.218000
RI5C_R9_74_I1J_07_13_2016_15_40_19_174	2019-08-26 18:57:31	E:/Aggression Videos/Bailey2/RI5C_R9_74_I1J_07_13_2016_15_40_19_174_0.avi	1080.470	30.0	No focal subject	2	267.953		STATE	566.486	566.717	0.231	0:09:26.486000
RI5C_R9_74_I1J_07_13_2016_15_40_19_174	2019-08-26 18:57:31	E:/Aggression Videos/Bailey2/RI5C_R9_74_I1J_07_13_2016_15_40_19_174_0.avi	1080.470	30.0	No focal subject	1	274.91		STATE	573.443	580.893	7.450	0:09:33.443000
RI5C_R9_74_I1J_07_13_2016_15_40_19_174	2019-08-26 18:57:31	E:/Aggression Videos/Bailey2/RI5C_R9_74_I1J_07_13_2016_15_40_19_174_0.avi	1080.470	30.0	No focal subject	8	301.534		STATE	600.067	660.167	60.100	0:10:00.067000
RI5C_R9_74_I1J_07_13_2016_15_40_19_174	2019-08-26 18:57:31	E:/Aggression Videos/Bailey2/RI5C_R9_74_I1J_07_13_2016_15_40_19_174_0.avi	1080.470	30.0	No focal subject	1	309.11		STATE	607.643	608.218	0.575	0:10:07.643000
RI5C_R9_74_I1J_07_13_2016_15_40_19_174	2019-08-26 18:57:31	E:/Aggression Videos/Bailey2/RI5C_R9_74_I1J_07_13_2016_15_40_19_174_0.avi	1080.470	30.0	No focal subject	2	333.285		STATE	631.818	637.767	5.949	0:10:31.818000
RI5C_R9_74_I1J_07_13_2016_15_40_19_174	2019-08-26 18:57:31	E:/Aggression Videos/Bailey2/RI5C_R9_74_I1J_07_13_2016_15_40_19_174_0.avi	1080.470	30.0	No focal subject	1	364.325		STATE	662.858	663.685	0.827	0:11:02.858000
RI5C_R9_74_I1J_07_13_2016_15_40_19_174	2019-08-26 18:57:31	E:/Aggression Videos/Bailey2/RI5C_R9_74_I1J_07_13_2016_15_40_19_174_0.avi	1080.470	30.0	No focal subject	1	369.867		STATE	668.400	669.226	0.826	0:11:08.400000
RI5C_R9_74_I1J_07_13_2016_15_40_19_174	2019-08-26 18:57:31	E:/Aggression Videos/Bailey2/RI5C_R9_74_I1J_07_13_2016_15_40_19_174_0.avi	1080.470	30.0	No focal subject	2	388.967		STATE	687.500	692.001	4.501	0:11:27.500000
RI5C_R9_74_I1J_07_13_2016_15_40_19_174	2019-08-26 18:57:31	E:/Aggression Videos/Bailey2/RI5C_R9_74_I1J_07_13_2016_15_40_19_174_0.avi	1080.470	30.0	No focal subject	1	395.521		STATE	694.054	694.935	0.881	0:11:34.054000
RI5C_R9_74_I1J_07_13_2016_15_40_19_174	2019-08-26 18:57:31	E:/Aggression Videos/Bailey2/RI5C_R9_74_I1J_07_13_2016_15_40_19_174_0.avi	1080.470	30.0	No focal subject	8	421.534		STATE	720.067	780.133	60.066	0:12:00.067000
RI5C_R9_74_I1J_07_13_2016_15_40_19_174	2019-08-26 18:57:31	E:/Aggression Videos/Bailey2/RI5C_R9_74_I1J_07_13_2016_15_40_19_174_0.avi	1080.470	30.0	No focal subject	2	433.96		STATE	732.493	733.943	1.450	0:12:12.493000
RI5C_R9_74_I1J_07_13_2016_15_40_19_174	2019-08-26 18:57:31	E:/Aggression Videos/Bailey2/RI5C_R9_74_I1J_07_13_2016_15_40_19_174_0.avi	1080.470	30.0	No focal subject	2	439.985		STATE	738.518	747.393	8.875	0:12:18.518000
RI5C_R9_74_I1J_07_13_2016_15_40_19_174	2019-08-26 18:57:31	E:/Aggression Videos/Bailey2/RI5C_R9_74_I1J_07_13_2016_15_40_19_174_0.avi	1080.470	30.0	No focal subject	2	461.967		STATE	760.500	764.726	4.226	0:12:40.500000
RI5C_R9_74_I1J_07_13_2016_15_40_19_174	2019-08-26 18:57:31	E:/Aggression Videos/Bailey2/RI5C_R9_74_I1J_07_13_2016_15_40_19_174_0.avi	1080.470	30.0	No focal subject	4	485.326		STATE	783.859	793.010	9.151	0:13:03.859000
RI5C_R9_74_I1J_07_13_2016_15_40_19_174	2019-08-26 18:57:31	E:/Aggression Videos/Bailey2/RI5C_R9_74_I1J_07_13_2016_15_40_19_174_0.avi	1080.470	30.0	No focal subject	6	495.668		STATE	794.201	801.474	7.273	0:13:14.201000
RI5C_R9_74_I1J_07_13_2016_15_40_19_174	2019-08-26 18:57:31	E:/Aggression Videos/Bailey2/RI5C_R9_74_I1J_07_13_2016_15_40_19_174_0.avi	1080.470	30.0	No focal subject	6	505.276		STATE	803.809	808.093	4.284	0:13:23.809000
RI5C_R9_74_I1J_07_13_2016_15_40_19_174	2019-08-26 18:57:31	E:/Aggression Videos/Bailey2/RI5C_R9_74_I1J_07_13_2016_15_40_19_174_0.avi	1080.470	30.0	No focal subject	5	510.685		STATE	809.218	810.068	0.850	0:13:29.218000
RI5C_R9_74_I1J_07_13_2016_15_40_19_174	2019-08-26 18:57:31	E:/Aggression Videos/Bailey2/RI5C_R9_74_I1J_07_13_2016_15_40_19_174_0.avi	1080.470	30.0	No focal subject	4	511.833		STATE	810.366	814.692	4.326	0:13:30.366000
RI5C_R9_74_I1J_07_13_2016_15_40_19_174	2019-08-26 18:57:31	E:/Aggression Videos/Bailey2/RI5C_R9_74_I1J_07_13_2016_15_40_19_174_0.avi	1080.470	30.0	No focal subject	6	533.759		STATE	832.292	834.017	1.725	0:13:52.292000
RI5C_R9_74_I1J_07_13_2016_15_40_19_174	2019-08-26 18:57:31	E:/Aggression Videos/Bailey2/RI5C_R9_74_I1J_07_13_2016_15_40_19_174_0.avi	1080.470	30.0	No focal subject	1	538.534		STATE	837.067	839.091	2.024	0:13:57.067000
RI5C_R9_74_I1J_07_13_2016_15_40_19_174	2019-08-26 18:57:31	E:/Aggression Videos/Bailey2/RI5C_R9_74_I1J_07_13_2016_15_40_19_174_0.avi	1080.470	30.0	No focal subject	8	542.967		STATE	841.500	900.267	58.767	0:14:01.500000
RI5C_R9_74_I1J_07_13_2016_15_40_19_174	2019-08-26 18:57:31	E:/Aggression Videos/Bailey2/RI5C_R9_74_I1J_07_13_2016_15_40_19_174_0.avi	1080.470	30.0	No focal subject	2	559.317		STATE	857.850	858.158	0.308	0:14:17.850000
RI5C_R9_74_I1J_07_13_2016_15_40_19_174	2019-08-26 18:57:31	E:/Aggression Videos/Bailey2/RI5C_R9_74_I1J_07_13_2016_15_40_19_174_0.avi	1080.470	30.0	No focal subject	2	603.158		STATE	901.691	901.992	0.301	0:15:01.691000
RI5C_R9_74_I1J_07_13_2016_15_40_19_174	2019-08-26 18:57:31	E:/Aggression Videos/Bailey2/RI5C_R9_74_I1J_07_13_2016_15_40_19_174_0.avi	1080.470	30.0	No focal subject	2	673.659		STATE	972.192	975.666	3.474	0:16:12.192000
RI5C_R9_74_I1J_07_13_2016_15_40_19_174	2019-08-26 18:57:31	E:/Aggression Videos/Bailey2/RI5C_R9_74_I1J_07_13_2016_15_40_19_174_0.avi	1080.470	30.0	No focal subject	3	677.434		STATE	975.967	976.541	0.574	0:16:15.967000
RI5C_R9_74_I1J_07_13_2016_15_40_19_174	2019-08-26 18:57:31	E:/Aggression Videos/Bailey2/RI5C_R9_74_I1J_07_13_2016_15_40_19_174_0.avi	1080.470	30.0	No focal subject	4	677.434		STATE	975.967	979.291	3.324	0:16:15.967000
RI5C_R9_74_I1J_07_13_2016_15_40_19_174	2019-08-26 18:57:31	E:/Aggression Videos/Bailey2/RI5C_R9_74_I1J_07_13_2016_15_40_19_174_0.avi	1080.470	30.0	No focal subject	6	699.134		STATE	997.667	1000.767	3.100	0:16:37.667000
RI5C_R9_74_I1J_07_13_2016_15_40_19_174	2019-08-26 18:57:31	E:/Aggression Videos/Bailey2/RI5C_R9_74_I1J_07_13_2016_15_40_19_174_0.avi	1080.470	30.0	No focal subject	4	702.533		STATE	1001.066	1001.916	0.850	0:16:41.066000
RI5C_R9_74_I1J_07_13_2016_15_40_19_174	2019-08-26 18:57:31	E:/Aggression Videos/Bailey2/RI5C_R9_74_I1J_07_13_2016_15_40_19_174_0.avi	1080.470	30.0	No focal subject	3	708.834		STATE	1007.367	1009.093	1.726	0:16:47.367000
RI5C_R9_74_I1J_07_13_2016_15_40_19_174	2019-08-26 18:57:31	E:/Aggression Videos/Bailey2/RI5C_R9_74_I1J_07_13_2016_15_40_19_174_0.avi	1080.470	30.0	No focal subject	1	719.909		STATE	1018.442	1019.017	0.575	0:16:58.442000
RI5C_R9_74_I1J_07_13_2016_15_40_19_174	2019-08-26 18:57:31	E:/Aggression Videos/Bailey2/RI5C_R9_74_I1J_07_13_2016_15_40_19_174_0.avi	1080.470	30.0	No focal subject	1	723.667		STATE	1022.200	1025.876	3.676	0:17:02.200000
RI5C_R9_74_I1J_07_13_2016_15_40_19_174	2019-08-26 18:57:31	E:/Aggression Videos/Bailey2/RI5C_R9_74_I1J_07_13_2016_15_40_19_174_0.avi	1080.470	30.0	No focal subject	4	758.536		STATE	1057.069	1060.831	3.762	0:17:37.069000
RI5C_R9_74_I1J_07_13_2016_15_40_19_174	2019-08-26 18:57:31	E:/Aggression Videos/Bailey2/RI5C_R9_74_I1J_07_13_2016_15_40_19_174_0.avi	1080.470	30.0	No focal subject	5	762.896		STATE	1061.429	1062.279	0.850	0:17:41.429000
RI5C_R9_74_I1J_07_13_2016_15_40_19_174	2019-08-26 18:57:31	E:/Aggression Videos/Bailey2/RI5C_R9_74_I1J_07_13_2016_15_40_19_174_0.avi	1080.470	30.0	No focal subject	4	763.761		STATE	1062.294	1064.847	2.553	0:17:42.294000
RI5C_R9_74_I1J_07_13_2016_15_40_19_174	2019-08-26 18:57:31	E:/Aggression Videos/Bailey2/RI5C_R9_74_I1J_07_13_2016_15_40_19_174_0.avi	1080.470	30.0	No focal subject	4	768.563		STATE	1067.096	1068.222	1.126	0:17:47.096000

## Sheet: 8B
Observation id	Observation date	Media file	Total length	FPS	Subject	Behavior	Behavioral category	Modifiers	Behavior type	Start (s)	Stop (s)	Duration (s)	Comment start	Comment stop
RI8B_R9_93_I5N_08_17_2016_15_40_19_174	2019-08-26 19:22:56	E:/Aggression Videos/Bailey2/RI8B_R9_93_I5N_08_17_2016_15_40_19_174_0.avi	1079.730	30.0	No focal subject	0	-0.207		POINT	299.126	299.126	NA
RI8B_R9_93_I5N_08_17_2016_15_40_19_174	2019-08-26 19:22:56	E:/Aggression Videos/Bailey2/RI8B_R9_93_I5N_08_17_2016_15_40_19_174_0.avi	1079.730	30.0	No focal subject	2	9.793		STATE	309.126	328.350	19.224
RI8B_R9_93_I5N_08_17_2016_15_40_19_174	2019-08-26 19:22:56	E:/Aggression Videos/Bailey2/RI8B_R9_93_I5N_08_17_2016_15_40_19_174_0.avi	1079.730	30.0	No focal subject	2	31.152		STATE	330.485	332.360	1.875
RI8B_R9_93_I5N_08_17_2016_15_40_19_174	2019-08-26 19:22:56	E:/Aggression Videos/Bailey2/RI8B_R9_93_I5N_08_17_2016_15_40_19_174_0.avi	1079.730	30.0	No focal subject	2	36.627		STATE	335.960	347.634	11.674
RI8B_R9_93_I5N_08_17_2016_15_40_19_174	2019-08-26 19:22:56	E:/Aggression Videos/Bailey2/RI8B_R9_93_I5N_08_17_2016_15_40_19_174_0.avi	1079.730	30.0	No focal subject	8	60		STATE	359.333	419.300	59.967
RI8B_R9_93_I5N_08_17_2016_15_40_19_174	2019-08-26 19:22:56	E:/Aggression Videos/Bailey2/RI8B_R9_93_I5N_08_17_2016_15_40_19_174_0.avi	1079.730	30.0	No focal subject	2	64.176		STATE	363.509	370.742	7.233
RI8B_R9_93_I5N_08_17_2016_15_40_19_174	2019-08-26 19:22:56	E:/Aggression Videos/Bailey2/RI8B_R9_93_I5N_08_17_2016_15_40_19_174_0.avi	1079.730	30.0	No focal subject	6	72.335		STATE	371.668	378.842	7.174
RI8B_R9_93_I5N_08_17_2016_15_40_19_174	2019-08-26 19:22:56	E:/Aggression Videos/Bailey2/RI8B_R9_93_I5N_08_17_2016_15_40_19_174_0.avi	1079.730	30.0	No focal subject	2	84.618		STATE	383.951	386.376	2.425
RI8B_R9_93_I5N_08_17_2016_15_40_19_174	2019-08-26 19:22:56	E:/Aggression Videos/Bailey2/RI8B_R9_93_I5N_08_17_2016_15_40_19_174_0.avi	1079.730	30.0	No focal subject	2	132.751		STATE	432.084	436.352	4.268
RI8B_R9_93_I5N_08_17_2016_15_40_19_174	2019-08-26 19:22:56	E:/Aggression Videos/Bailey2/RI8B_R9_93_I5N_08_17_2016_15_40_19_174_0.avi	1079.730	30.0	No focal subject	6	138.801		STATE	438.134	439.183	1.049
RI8B_R9_93_I5N_08_17_2016_15_40_19_174	2019-08-26 19:22:56	E:/Aggression Videos/Bailey2/RI8B_R9_93_I5N_08_17_2016_15_40_19_174_0.avi	1079.730	30.0	No focal subject	2	144.501		STATE	443.834	445.884	2.050
RI8B_R9_93_I5N_08_17_2016_15_40_19_174	2019-08-26 19:22:56	E:/Aggression Videos/Bailey2/RI8B_R9_93_I5N_08_17_2016_15_40_19_174_0.avi	1079.730	30.0	No focal subject	6	156.426		STATE	455.759	462.792	7.033
RI8B_R9_93_I5N_08_17_2016_15_40_19_174	2019-08-26 19:22:56	E:/Aggression Videos/Bailey2/RI8B_R9_93_I5N_08_17_2016_15_40_19_174_0.avi	1079.730	30.0	No focal subject	8	180.067		STATE	479.400	539.433	60.033
RI8B_R9_93_I5N_08_17_2016_15_40_19_174	2019-08-26 19:22:56	E:/Aggression Videos/Bailey2/RI8B_R9_93_I5N_08_17_2016_15_40_19_174_0.avi	1079.730	30.0	No focal subject	2	189.143		STATE	488.476	488.993	0.517
RI8B_R9_93_I5N_08_17_2016_15_40_19_174	2019-08-26 19:22:56	E:/Aggression Videos/Bailey2/RI8B_R9_93_I5N_08_17_2016_15_40_19_174_0.avi	1079.730	30.0	No focal subject	6	192.484		STATE	491.817	503.317	11.500
RI8B_R9_93_I5N_08_17_2016_15_40_19_174	2019-08-26 19:22:56	E:/Aggression Videos/Bailey2/RI8B_R9_93_I5N_08_17_2016_15_40_19_174_0.avi	1079.730	30.0	No focal subject	1	211.234		STATE	510.567	511.317	0.750
RI8B_R9_93_I5N_08_17_2016_15_40_19_174	2019-08-26 19:22:56	E:/Aggression Videos/Bailey2/RI8B_R9_93_I5N_08_17_2016_15_40_19_174_0.avi	1079.730	30.0	No focal subject	1	216.134		STATE	515.467	515.718	0.251
RI8B_R9_93_I5N_08_17_2016_15_40_19_174	2019-08-26 19:22:56	E:/Aggression Videos/Bailey2/RI8B_R9_93_I5N_08_17_2016_15_40_19_174_0.avi	1079.730	30.0	No focal subject	1	219.759		STATE	519.092	524.818	5.726
RI8B_R9_93_I5N_08_17_2016_15_40_19_174	2019-08-26 19:22:56	E:/Aggression Videos/Bailey2/RI8B_R9_93_I5N_08_17_2016_15_40_19_174_0.avi	1079.730	30.0	No focal subject	6	274.325		STATE	573.658	577.758	4.100
RI8B_R9_93_I5N_08_17_2016_15_40_19_174	2019-08-26 19:22:56	E:/Aggression Videos/Bailey2/RI8B_R9_93_I5N_08_17_2016_15_40_19_174_0.avi	1079.730	30.0	No focal subject	8	300.134		STATE	599.467	659.533	60.066
RI8B_R9_93_I5N_08_17_2016_15_40_19_174	2019-08-26 19:22:56	E:/Aggression Videos/Bailey2/RI8B_R9_93_I5N_08_17_2016_15_40_19_174_0.avi	1079.730	30.0	No focal subject	2	320.632		STATE	619.965	620.758	0.793
RI8B_R9_93_I5N_08_17_2016_15_40_19_174	2019-08-26 19:22:56	E:/Aggression Videos/Bailey2/RI8B_R9_93_I5N_08_17_2016_15_40_19_174_0.avi	1079.730	30.0	No focal subject	7	354.901		STATE	654.234	654.758	0.524
RI8B_R9_93_I5N_08_17_2016_15_40_19_174	2019-08-26 19:22:56	E:/Aggression Videos/Bailey2/RI8B_R9_93_I5N_08_17_2016_15_40_19_174_0.avi	1079.730	30.0	No focal subject	2	381.384		STATE	680.717	686.717	6.000
RI8B_R9_93_I5N_08_17_2016_15_40_19_174	2019-08-26 19:22:56	E:/Aggression Videos/Bailey2/RI8B_R9_93_I5N_08_17_2016_15_40_19_174_0.avi	1079.730	30.0	No focal subject	2	419.733		STATE	719.066	724.342	5.276
RI8B_R9_93_I5N_08_17_2016_15_40_19_174	2019-08-26 19:22:56	E:/Aggression Videos/Bailey2/RI8B_R9_93_I5N_08_17_2016_15_40_19_174_0.avi	1079.730	30.0	No focal subject	8	420.167		STATE	719.500	779.533	60.033
RI8B_R9_93_I5N_08_17_2016_15_40_19_174	2019-08-26 19:22:56	E:/Aggression Videos/Bailey2/RI8B_R9_93_I5N_08_17_2016_15_40_19_174_0.avi	1079.730	30.0	No focal subject	2	446.326		STATE	745.659	752.759	7.100
RI8B_R9_93_I5N_08_17_2016_15_40_19_174	2019-08-26 19:22:56	E:/Aggression Videos/Bailey2/RI8B_R9_93_I5N_08_17_2016_15_40_19_174_0.avi	1079.730	30.0	No focal subject	6	454.075		STATE	753.408	753.908	0.500
RI8B_R9_93_I5N_08_17_2016_15_40_19_174	2019-08-26 19:22:56	E:/Aggression Videos/Bailey2/RI8B_R9_93_I5N_08_17_2016_15_40_19_174_0.avi	1079.730	30.0	No focal subject	2	463.326		STATE	762.659	765.783	3.124
RI8B_R9_93_I5N_08_17_2016_15_40_19_174	2019-08-26 19:22:56	E:/Aggression Videos/Bailey2/RI8B_R9_93_I5N_08_17_2016_15_40_19_174_0.avi	1079.730	30.0	No focal subject	6	467.726		STATE	767.059	770.908	3.849
RI8B_R9_93_I5N_08_17_2016_15_40_19_174	2019-08-26 19:22:56	E:/Aggression Videos/Bailey2/RI8B_R9_93_I5N_08_17_2016_15_40_19_174_0.avi	1079.730	30.0	No focal subject	2	492.051		STATE	791.384	795.033	3.649
RI8B_R9_93_I5N_08_17_2016_15_40_19_174	2019-08-26 19:22:56	E:/Aggression Videos/Bailey2/RI8B_R9_93_I5N_08_17_2016_15_40_19_174_0.avi	1079.730	30.0	No focal subject	4	525.848		STATE	825.181	827.317	2.136
RI8B_R9_93_I5N_08_17_2016_15_40_19_174	2019-08-26 19:22:56	E:/Aggression Videos/Bailey2/RI8B_R9_93_I5N_08_17_2016_15_40_19_174_0.avi	1079.730	30.0	No focal subject	8	540.234		STATE	839.567	899.900	60.333
RI8B_R9_93_I5N_08_17_2016_15_40_19_174	2019-08-26 19:22:56	E:/Aggression Videos/Bailey2/RI8B_R9_93_I5N_08_17_2016_15_40_19_174_0.avi	1079.730	30.0	No focal subject	1	541.658		STATE	840.991	846.242	5.251
RI8B_R9_93_I5N_08_17_2016_15_40_19_174	2019-08-26 19:22:56	E:/Aggression Videos/Bailey2/RI8B_R9_93_I5N_08_17_2016_15_40_19_174_0.avi	1079.730	30.0	No focal subject	6	552.676		STATE	852.009	857.134	5.125
RI8B_R9_93_I5N_08_17_2016_15_40_19_174	2019-08-26 19:22:56	E:/Aggression Videos/Bailey2/RI8B_R9_93_I5N_08_17_2016_15_40_19_174_0.avi	1079.730	30.0	No focal subject	1	561.446		STATE	860.779	874.678	13.899
RI8B_R9_93_I5N_08_17_2016_15_40_19_174	2019-08-26 19:22:56	E:/Aggression Videos/Bailey2/RI8B_R9_93_I5N_08_17_2016_15_40_19_174_0.avi	1079.730	30.0	No focal subject	1	581.971		STATE	881.304	888.329	7.025
RI8B_R9_93_I5N_08_17_2016_15_40_19_174	2019-08-26 19:22:56	E:/Aggression Videos/Bailey2/RI8B_R9_93_I5N_08_17_2016_15_40_19_174_0.avi	1079.730	30.0	No focal subject	1	595.164		STATE	894.497	895.795	1.298
RI8B_R9_93_I5N_08_17_2016_15_40_19_174	2019-08-26 19:22:56	E:/Aggression Videos/Bailey2/RI8B_R9_93_I5N_08_17_2016_15_40_19_174_0.avi	1079.730	30.0	No focal subject	2	704.092		STATE	1003.425	1005.776	2.351
RI8B_R9_93_I5N_08_17_2016_15_40_19_174	2019-08-26 19:22:56	E:/Aggression Videos/Bailey2/RI8B_R9_93_I5N_08_17_2016_15_40_19_174_0.avi	1079.730	30.0	No focal subject	1	707.009		STATE	1006.342	1006.866	0.524
RI8B_R9_93_I5N_08_17_2016_15_40_19_174	2019-08-26 19:22:56	E:/Aggression Videos/Bailey2/RI8B_R9_93_I5N_08_17_2016_15_40_19_174_0.avi	1079.730	30.0	No focal subject	1	715.383		STATE	1014.716	1017.541	2.825
RI8B_R9_93_I5N_08_17_2016_15_40_19_174	2019-08-26 19:22:56	E:/Aggression Videos/Bailey2/RI8B_R9_93_I5N_08_17_2016_15_40_19_174_0.avi	1079.730	30.0	No focal subject	2	723.983		STATE	1023.316	1028.742	5.426

## Sheet: 8C
Observation id	Observation date	Media file	Total length	FPS	Subject	Behavior	Behavioral category	Modifiers	Behavior type	Start (s)	Stop (s)	Duration (s)	Comment start	Comment stop
RI8C_R9_93_I1N_08_24_2016_15_40_19_174	2019-08-26 21:12:14	E:/Aggression Videos/Bailey2/RI8C_R9_93_I1N_08_24_2016_15_40_19_174_0.avi	1077.930	30.0	No focal subject	0	9.914		POINT	309.681	309.681	NA
RI8C_R9_93_I1N_08_24_2016_15_40_19_174	2019-08-26 21:12:14	E:/Aggression Videos/Bailey2/RI8C_R9_93_I1N_08_24_2016_15_40_19_174_0.avi	1077.930	30.0	No focal subject	2	13.158		STATE	312.925	318.375	5.450
RI8C_R9_93_I1N_08_24_2016_15_40_19_174	2019-08-26 21:12:14	E:/Aggression Videos/Bailey2/RI8C_R9_93_I1N_08_24_2016_15_40_19_174_0.avi	1077.930	30.0	No focal subject	2	21.759		STATE	321.526	327.001	5.475
RI8C_R9_93_I1N_08_24_2016_15_40_19_174	2019-08-26 21:12:14	E:/Aggression Videos/Bailey2/RI8C_R9_93_I1N_08_24_2016_15_40_19_174_0.avi	1077.930	30.0	No focal subject	2	30.883		STATE	330.650	336.550	5.900
RI8C_R9_93_I1N_08_24_2016_15_40_19_174	2019-08-26 21:12:14	E:/Aggression Videos/Bailey2/RI8C_R9_93_I1N_08_24_2016_15_40_19_174_0.avi	1077.930	30.0	No focal subject	6	48.166		STATE	347.933	348.683	0.750
RI8C_R9_93_I1N_08_24_2016_15_40_19_174	2019-08-26 21:12:14	E:/Aggression Videos/Bailey2/RI8C_R9_93_I1N_08_24_2016_15_40_19_174_0.avi	1077.930	30.0	No focal subject	8	60		STATE	359.767	419.733	59.966
RI8C_R9_93_I1N_08_24_2016_15_40_19_174	2019-08-26 21:12:14	E:/Aggression Videos/Bailey2/RI8C_R9_93_I1N_08_24_2016_15_40_19_174_0.avi	1077.930	30.0	No focal subject	2	60.267		STATE	360.034	370.559	10.525
RI8C_R9_93_I1N_08_24_2016_15_40_19_174	2019-08-26 21:12:14	E:/Aggression Videos/Bailey2/RI8C_R9_93_I1N_08_24_2016_15_40_19_174_0.avi	1077.930	30.0	No focal subject	1	71.825		STATE	371.592	372.367	0.775
RI8C_R9_93_I1N_08_24_2016_15_40_19_174	2019-08-26 21:12:14	E:/Aggression Videos/Bailey2/RI8C_R9_93_I1N_08_24_2016_15_40_19_174_0.avi	1077.930	30.0	No focal subject	2	75.176		STATE	374.943	378.067	3.124
RI8C_R9_93_I1N_08_24_2016_15_40_19_174	2019-08-26 21:12:14	E:/Aggression Videos/Bailey2/RI8C_R9_93_I1N_08_24_2016_15_40_19_174_0.avi	1077.930	30.0	No focal subject	2	86.125		STATE	385.892	395.143	9.251
RI8C_R9_93_I1N_08_24_2016_15_40_19_174	2019-08-26 21:12:14	E:/Aggression Videos/Bailey2/RI8C_R9_93_I1N_08_24_2016_15_40_19_174_0.avi	1077.930	30.0	No focal subject	2	99.551		STATE	399.318	404.443	5.125
RI8C_R9_93_I1N_08_24_2016_15_40_19_174	2019-08-26 21:12:14	E:/Aggression Videos/Bailey2/RI8C_R9_93_I1N_08_24_2016_15_40_19_174_0.avi	1077.930	30.0	No focal subject	2	135.491		STATE	435.258	439.158	3.900
RI8C_R9_93_I1N_08_24_2016_15_40_19_174	2019-08-26 21:12:14	E:/Aggression Videos/Bailey2/RI8C_R9_93_I1N_08_24_2016_15_40_19_174_0.avi	1077.930	30.0	No focal subject	2	159.367		STATE	459.134	461.459	2.325
RI8C_R9_93_I1N_08_24_2016_15_40_19_174	2019-08-26 21:12:14	E:/Aggression Videos/Bailey2/RI8C_R9_93_I1N_08_24_2016_15_40_19_174_0.avi	1077.930	30.0	No focal subject	6	164.792		STATE	464.559	467.434	2.875
RI8C_R9_93_I1N_08_24_2016_15_40_19_174	2019-08-26 21:12:14	E:/Aggression Videos/Bailey2/RI8C_R9_93_I1N_08_24_2016_15_40_19_174_0.avi	1077.930	30.0	No focal subject	7	170.767		STATE	470.534	471.084	0.550
RI8C_R9_93_I1N_08_24_2016_15_40_19_174	2019-08-26 21:12:14	E:/Aggression Videos/Bailey2/RI8C_R9_93_I1N_08_24_2016_15_40_19_174_0.avi	1077.930	30.0	No focal subject	3	171.851		STATE	471.618	471.834	0.216
RI8C_R9_93_I1N_08_24_2016_15_40_19_174	2019-08-26 21:12:14	E:/Aggression Videos/Bailey2/RI8C_R9_93_I1N_08_24_2016_15_40_19_174_0.avi	1077.930	30.0	No focal subject	8	179.833		STATE	479.600	539.900	60.300
RI8C_R9_93_I1N_08_24_2016_15_40_19_174	2019-08-26 21:12:14	E:/Aggression Videos/Bailey2/RI8C_R9_93_I1N_08_24_2016_15_40_19_174_0.avi	1077.930	30.0	No focal subject	6	181.159		STATE	480.926	482.242	1.316
RI8C_R9_93_I1N_08_24_2016_15_40_19_174	2019-08-26 21:12:14	E:/Aggression Videos/Bailey2/RI8C_R9_93_I1N_08_24_2016_15_40_19_174_0.avi	1077.930	30.0	No focal subject	2	193.475		STATE	493.242	494.493	1.251
RI8C_R9_93_I1N_08_24_2016_15_40_19_174	2019-08-26 21:12:14	E:/Aggression Videos/Bailey2/RI8C_R9_93_I1N_08_24_2016_15_40_19_174_0.avi	1077.930	30.0	No focal subject	2	201.176		STATE	500.943	502.267	1.324
RI8C_R9_93_I1N_08_24_2016_15_40_19_174	2019-08-26 21:12:14	E:/Aggression Videos/Bailey2/RI8C_R9_93_I1N_08_24_2016_15_40_19_174_0.avi	1077.930	30.0	No focal subject	2	210.749		STATE	510.516	512.566	2.050
RI8C_R9_93_I1N_08_24_2016_15_40_19_174	2019-08-26 21:12:14	E:/Aggression Videos/Bailey2/RI8C_R9_93_I1N_08_24_2016_15_40_19_174_0.avi	1077.930	30.0	No focal subject	2	255.532		STATE	555.299	556.324	1.025
RI8C_R9_93_I1N_08_24_2016_15_40_19_174	2019-08-26 21:12:14	E:/Aggression Videos/Bailey2/RI8C_R9_93_I1N_08_24_2016_15_40_19_174_0.avi	1077.930	30.0	No focal subject	1	267.526		STATE	567.293	568.093	0.800
RI8C_R9_93_I1N_08_24_2016_15_40_19_174	2019-08-26 21:12:14	E:/Aggression Videos/Bailey2/RI8C_R9_93_I1N_08_24_2016_15_40_19_174_0.avi	1077.930	30.0	No focal subject	2	277.5		STATE	577.267	579.569	2.302
RI8C_R9_93_I1N_08_24_2016_15_40_19_174	2019-08-26 21:12:14	E:/Aggression Videos/Bailey2/RI8C_R9_93_I1N_08_24_2016_15_40_19_174_0.avi	1077.930	30.0	No focal subject	2	292.892		STATE	592.659	595.043	2.384
RI8C_R9_93_I1N_08_24_2016_15_40_19_174	2019-08-26 21:12:14	E:/Aggression Videos/Bailey2/RI8C_R9_93_I1N_08_24_2016_15_40_19_174_0.avi	1077.930	30.0	No focal subject	8	300.266		STATE	600.033	659.967	59.934
RI8C_R9_93_I1N_08_24_2016_15_40_19_174	2019-08-26 21:12:14	E:/Aggression Videos/Bailey2/RI8C_R9_93_I1N_08_24_2016_15_40_19_174_0.avi	1077.930	30.0	No focal subject	2	314.667		STATE	614.434	615.983	1.549
RI8C_R9_93_I1N_08_24_2016_15_40_19_174	2019-08-26 21:12:14	E:/Aggression Videos/Bailey2/RI8C_R9_93_I1N_08_24_2016_15_40_19_174_0.avi	1077.930	30.0	No focal subject	2	335.716		STATE	635.483	638.333	2.850
RI8C_R9_93_I1N_08_24_2016_15_40_19_174	2019-08-26 21:12:14	E:/Aggression Videos/Bailey2/RI8C_R9_93_I1N_08_24_2016_15_40_19_174_0.avi	1077.930	30.0	No focal subject	4	372.467		STATE	672.234	675.934	3.700
RI8C_R9_93_I1N_08_24_2016_15_40_19_174	2019-08-26 21:12:14	E:/Aggression Videos/Bailey2/RI8C_R9_93_I1N_08_24_2016_15_40_19_174_0.avi	1077.930	30.0	No focal subject	4	384.882		STATE	684.649	692.018	7.369
RI8C_R9_93_I1N_08_24_2016_15_40_19_174	2019-08-26 21:12:14	E:/Aggression Videos/Bailey2/RI8C_R9_93_I1N_08_24_2016_15_40_19_174_0.avi	1077.930	30.0	No focal subject	6	405.925		STATE	705.692	710.443	4.751
RI8C_R9_93_I1N_08_24_2016_15_40_19_174	2019-08-26 21:12:14	E:/Aggression Videos/Bailey2/RI8C_R9_93_I1N_08_24_2016_15_40_19_174_0.avi	1077.930	30.0	No focal subject	8	420.2		STATE	719.967	779.967	60.000
RI8C_R9_93_I1N_08_24_2016_15_40_19_174	2019-08-26 21:12:14	E:/Aggression Videos/Bailey2/RI8C_R9_93_I1N_08_24_2016_15_40_19_174_0.avi	1077.930	30.0	No focal subject	2	446.376		STATE	746.143	755.317	9.174
RI8C_R9_93_I1N_08_24_2016_15_40_19_174	2019-08-26 21:12:14	E:/Aggression Videos/Bailey2/RI8C_R9_93_I1N_08_24_2016_15_40_19_174_0.avi	1077.930	30.0	No focal subject	2	464.267		STATE	764.034	767.134	3.100
RI8C_R9_93_I1N_08_24_2016_15_40_19_174	2019-08-26 21:12:14	E:/Aggression Videos/Bailey2/RI8C_R9_93_I1N_08_24_2016_15_40_19_174_0.avi	1077.930	30.0	No focal subject	1	484.999		STATE	784.766	791.741	6.975
RI8C_R9_93_I1N_08_24_2016_15_40_19_174	2019-08-26 21:12:14	E:/Aggression Videos/Bailey2/RI8C_R9_93_I1N_08_24_2016_15_40_19_174_0.avi	1077.930	30.0	No focal subject	2	499.275		STATE	799.042	801.600	2.558
RI8C_R9_93_I1N_08_24_2016_15_40_19_174	2019-08-26 21:12:14	E:/Aggression Videos/Bailey2/RI8C_R9_93_I1N_08_24_2016_15_40_19_174_0.avi	1077.930	30.0	No focal subject	7	508.158		STATE	807.925	809.650	1.725
RI8C_R9_93_I1N_08_24_2016_15_40_19_174	2019-08-26 21:12:14	E:/Aggression Videos/Bailey2/RI8C_R9_93_I1N_08_24_2016_15_40_19_174_0.avi	1077.930	30.0	No focal subject	4	520.65		STATE	820.417	821.876	1.459
RI8C_R9_93_I1N_08_24_2016_15_40_19_174	2019-08-26 21:12:14	E:/Aggression Videos/Bailey2/RI8C_R9_93_I1N_08_24_2016_15_40_19_174_0.avi	1077.930	30.0	No focal subject	8	540.233		STATE	840.000	900.067	60.067
RI8C_R9_93_I1N_08_24_2016_15_40_19_174	2019-08-26 21:12:14	E:/Aggression Videos/Bailey2/RI8C_R9_93_I1N_08_24_2016_15_40_19_174_0.avi	1077.930	30.0	No focal subject	4	541.084		STATE	840.851	843.400	2.549
RI8C_R9_93_I1N_08_24_2016_15_40_19_174	2019-08-26 21:12:14	E:/Aggression Videos/Bailey2/RI8C_R9_93_I1N_08_24_2016_15_40_19_174_0.avi	1077.930	30.0	No focal subject	2	556.883		STATE	856.650	861.675	5.025
RI8C_R9_93_I1N_08_24_2016_15_40_19_174	2019-08-26 21:12:14	E:/Aggression Videos/Bailey2/RI8C_R9_93_I1N_08_24_2016_15_40_19_174_0.avi	1077.930	30.0	No focal subject	1	565.031		STATE	864.798	867.323	2.525
RI8C_R9_93_I1N_08_24_2016_15_40_19_174	2019-08-26 21:12:14	E:/Aggression Videos/Bailey2/RI8C_R9_93_I1N_08_24_2016_15_40_19_174_0.avi	1077.930	30.0	No focal subject	4	601.576		STATE	901.343	903.041	1.698
RI8C_R9_93_I1N_08_24_2016_15_40_19_174	2019-08-26 21:12:14	E:/Aggression Videos/Bailey2/RI8C_R9_93_I1N_08_24_2016_15_40_19_174_0.avi	1077.930	30.0	No focal subject	6	603.824		STATE	903.591	904.742	1.151
RI8C_R9_93_I1N_08_24_2016_15_40_19_174	2019-08-26 21:12:14	E:/Aggression Videos/Bailey2/RI8C_R9_93_I1N_08_24_2016_15_40_19_174_0.avi	1077.930	30.0	No focal subject	4	605.267		STATE	905.034	907.833	2.799
RI8C_R9_93_I1N_08_24_2016_15_40_19_174	2019-08-26 21:12:14	E:/Aggression Videos/Bailey2/RI8C_R9_93_I1N_08_24_2016_15_40_19_174_0.avi	1077.930	30.0	No focal subject	6	609.224		STATE	908.991	914.017	5.026
RI8C_R9_93_I1N_08_24_2016_15_40_19_174	2019-08-26 21:12:14	E:/Aggression Videos/Bailey2/RI8C_R9_93_I1N_08_24_2016_15_40_19_174_0.avi	1077.930	30.0	No focal subject	1	615.033		STATE	914.800	915.676	0.876
RI8C_R9_93_I1N_08_24_2016_15_40_19_174	2019-08-26 21:12:14	E:/Aggression Videos/Bailey2/RI8C_R9_93_I1N_08_24_2016_15_40_19_174_0.avi	1077.930	30.0	No focal subject	6	620.184		STATE	919.951	922.225	2.274
RI8C_R9_93_I1N_08_24_2016_15_40_19_174	2019-08-26 21:12:14	E:/Aggression Videos/Bailey2/RI8C_R9_93_I1N_08_24_2016_15_40_19_174_0.avi	1077.930	30.0	No focal subject	1	719.832		STATE	1019.599	1028.526	8.927
RI8C_R9_93_I1N_08_24_2016_15_40_19_174	2019-08-26 21:12:14	E:/Aggression Videos/Bailey2/RI8C_R9_93_I1N_08_24_2016_15_40_19_174_0.avi	1077.930	30.0	No focal subject	1	756.642		STATE	1056.409	1058.259	1.850
RI8C_R9_93_I1N_08_24_2016_15_40_19_174	2019-08-26 21:12:14	E:/Aggression Videos/Bailey2/RI8C_R9_93_I1N_08_24_2016_15_40_19_174_0.avi	1077.930	30.0	No focal subject	1	769.686		STATE	1069.453	1074.403	4.950

## Sheet: 8D
Observation id	Observation date	Media file	Total length	FPS	Subject	Behavior	Behavioral category	Modifiers	Behavior type	Start (s)	Stop (s)	Duration (s)	Comment start	Comment stop
RI8D_R9_93_I5N_08_17_2016_15_40_19_174	2019-08-26 21:39:16	E:/Aggression Videos/Bailey2/RI8D_R9_93_I5N_08_17_2016_15_40_19_174_1.avi	1079.630	30.0	No focal subject	0	-0.165		POINT	299.035	299.035	NA
RI8D_R9_93_I5N_08_17_2016_15_40_19_174	2019-08-26 21:39:16	E:/Aggression Videos/Bailey2/RI8D_R9_93_I5N_08_17_2016_15_40_19_174_1.avi	1079.630	30.0	No focal subject	2	10.91		STATE	310.110	328.485	18.375
RI8D_R9_93_I5N_08_17_2016_15_40_19_174	2019-08-26 21:39:16	E:/Aggression Videos/Bailey2/RI8D_R9_93_I5N_08_17_2016_15_40_19_174_1.avi	1079.630	30.0	No focal subject	2	31.634		STATE	330.834	332.385	1.551
RI8D_R9_93_I5N_08_17_2016_15_40_19_174	2019-08-26 21:39:16	E:/Aggression Videos/Bailey2/RI8D_R9_93_I5N_08_17_2016_15_40_19_174_1.avi	1079.630	30.0	No focal subject	2	36.56		STATE	335.760	347.335	11.575
RI8D_R9_93_I5N_08_17_2016_15_40_19_174	2019-08-26 21:39:16	E:/Aggression Videos/Bailey2/RI8D_R9_93_I5N_08_17_2016_15_40_19_174_1.avi	1079.630	30.0	No focal subject	8	60		STATE	359.200	419.532	60.332
RI8D_R9_93_I5N_08_17_2016_15_40_19_174	2019-08-26 21:39:16	E:/Aggression Videos/Bailey2/RI8D_R9_93_I5N_08_17_2016_15_40_19_174_1.avi	1079.630	30.0	No focal subject	2	64.281		STATE	363.481	372.627	9.146
RI8D_R9_93_I5N_08_17_2016_15_40_19_174	2019-08-26 21:39:16	E:/Aggression Videos/Bailey2/RI8D_R9_93_I5N_08_17_2016_15_40_19_174_1.avi	1079.630	30.0	No focal subject	6	74.201		STATE	373.401	378.755	5.354
RI8D_R9_93_I5N_08_17_2016_15_40_19_174	2019-08-26 21:39:16	E:/Aggression Videos/Bailey2/RI8D_R9_93_I5N_08_17_2016_15_40_19_174_1.avi	1079.630	30.0	No focal subject	2	83.456		STATE	382.656	386.130	3.474
RI8D_R9_93_I5N_08_17_2016_15_40_19_174	2019-08-26 21:39:16	E:/Aggression Videos/Bailey2/RI8D_R9_93_I5N_08_17_2016_15_40_19_174_1.avi	1079.630	30.0	No focal subject	2	132.718		STATE	431.918	440.027	8.109
RI8D_R9_93_I5N_08_17_2016_15_40_19_174	2019-08-26 21:39:16	E:/Aggression Videos/Bailey2/RI8D_R9_93_I5N_08_17_2016_15_40_19_174_1.avi	1079.630	30.0	No focal subject	2	143.249		STATE	442.449	445.978	3.529
RI8D_R9_93_I5N_08_17_2016_15_40_19_174	2019-08-26 21:39:16	E:/Aggression Videos/Bailey2/RI8D_R9_93_I5N_08_17_2016_15_40_19_174_1.avi	1079.630	30.0	No focal subject	6	156.61		STATE	455.810	463.567	7.757
RI8D_R9_93_I5N_08_17_2016_15_40_19_174	2019-08-26 21:39:16	E:/Aggression Videos/Bailey2/RI8D_R9_93_I5N_08_17_2016_15_40_19_174_1.avi	1079.630	30.0	No focal subject	8	180.609		STATE	479.809	539.410	59.601
RI8D_R9_93_I5N_08_17_2016_15_40_19_174	2019-08-26 21:39:16	E:/Aggression Videos/Bailey2/RI8D_R9_93_I5N_08_17_2016_15_40_19_174_1.avi	1079.630	30.0	No focal subject	2	188.089		STATE	487.289	489.685	2.396
RI8D_R9_93_I5N_08_17_2016_15_40_19_174	2019-08-26 21:39:16	E:/Aggression Videos/Bailey2/RI8D_R9_93_I5N_08_17_2016_15_40_19_174_1.avi	1079.630	30.0	No focal subject	6	193.109		STATE	492.309	502.559	10.250
RI8D_R9_93_I5N_08_17_2016_15_40_19_174	2019-08-26 21:39:16	E:/Aggression Videos/Bailey2/RI8D_R9_93_I5N_08_17_2016_15_40_19_174_1.avi	1079.630	30.0	No focal subject	1	211.342		STATE	510.542	510.792	0.250
RI8D_R9_93_I5N_08_17_2016_15_40_19_174	2019-08-26 21:39:16	E:/Aggression Videos/Bailey2/RI8D_R9_93_I5N_08_17_2016_15_40_19_174_1.avi	1079.630	30.0	No focal subject	1	216.185		STATE	515.385	515.659	0.274
RI8D_R9_93_I5N_08_17_2016_15_40_19_174	2019-08-26 21:39:16	E:/Aggression Videos/Bailey2/RI8D_R9_93_I5N_08_17_2016_15_40_19_174_1.avi	1079.630	30.0	No focal subject	1	219.489		STATE	518.689	525.760	7.071
RI8D_R9_93_I5N_08_17_2016_15_40_19_174	2019-08-26 21:39:16	E:/Aggression Videos/Bailey2/RI8D_R9_93_I5N_08_17_2016_15_40_19_174_1.avi	1079.630	30.0	No focal subject	6	274.135		STATE	573.335	577.160	3.825
RI8D_R9_93_I5N_08_17_2016_15_40_19_174	2019-08-26 21:39:16	E:/Aggression Videos/Bailey2/RI8D_R9_93_I5N_08_17_2016_15_40_19_174_1.avi	1079.630	30.0	No focal subject	8	300.133		STATE	599.333	659.750	60.417
RI8D_R9_93_I5N_08_17_2016_15_40_19_174	2019-08-26 21:39:16	E:/Aggression Videos/Bailey2/RI8D_R9_93_I5N_08_17_2016_15_40_19_174_1.avi	1079.630	30.0	No focal subject	2	318.825		STATE	618.025	620.335	2.310
RI8D_R9_93_I5N_08_17_2016_15_40_19_174	2019-08-26 21:39:16	E:/Aggression Videos/Bailey2/RI8D_R9_93_I5N_08_17_2016_15_40_19_174_1.avi	1079.630	30.0	No focal subject	2	353.549		STATE	652.749	655.282	2.533
RI8D_R9_93_I5N_08_17_2016_15_40_19_174	2019-08-26 21:39:16	E:/Aggression Videos/Bailey2/RI8D_R9_93_I5N_08_17_2016_15_40_19_174_1.avi	1079.630	30.0	No focal subject	2	378.179		STATE	677.379	687.178	9.799
RI8D_R9_93_I5N_08_17_2016_15_40_19_174	2019-08-26 21:39:16	E:/Aggression Videos/Bailey2/RI8D_R9_93_I5N_08_17_2016_15_40_19_174_1.avi	1079.630	30.0	No focal subject	2	420.133		STATE	719.333	722.156	2.823
RI8D_R9_93_I5N_08_17_2016_15_40_19_174	2019-08-26 21:39:16	E:/Aggression Videos/Bailey2/RI8D_R9_93_I5N_08_17_2016_15_40_19_174_1.avi	1079.630	30.0	No focal subject	8	420.664		STATE	719.864	779.333	59.469
RI8D_R9_93_I5N_08_17_2016_15_40_19_174	2019-08-26 21:39:16	E:/Aggression Videos/Bailey2/RI8D_R9_93_I5N_08_17_2016_15_40_19_174_1.avi	1079.630	30.0	No focal subject	2	445.423		STATE	744.623	752.781	8.158
RI8D_R9_93_I5N_08_17_2016_15_40_19_174	2019-08-26 21:39:16	E:/Aggression Videos/Bailey2/RI8D_R9_93_I5N_08_17_2016_15_40_19_174_1.avi	1079.630	30.0	No focal subject	2	464.512		STATE	763.712	765.772	2.060
RI8D_R9_93_I5N_08_17_2016_15_40_19_174	2019-08-26 21:39:16	E:/Aggression Videos/Bailey2/RI8D_R9_93_I5N_08_17_2016_15_40_19_174_1.avi	1079.630	30.0	No focal subject	6	468.747		STATE	767.947	768.697	0.750
RI8D_R9_93_I5N_08_17_2016_15_40_19_174	2019-08-26 21:39:16	E:/Aggression Videos/Bailey2/RI8D_R9_93_I5N_08_17_2016_15_40_19_174_1.avi	1079.630	30.0	No focal subject	6	471.022		STATE	770.222	770.723	0.501
RI8D_R9_93_I5N_08_17_2016_15_40_19_174	2019-08-26 21:39:16	E:/Aggression Videos/Bailey2/RI8D_R9_93_I5N_08_17_2016_15_40_19_174_1.avi	1079.630	30.0	No focal subject	2	492.962		STATE	792.162	795.013	2.851
RI8D_R9_93_I5N_08_17_2016_15_40_19_174	2019-08-26 21:39:16	E:/Aggression Videos/Bailey2/RI8D_R9_93_I5N_08_17_2016_15_40_19_174_1.avi	1079.630	30.0	No focal subject	2	525.901		STATE	825.101	829.701	4.600
RI8D_R9_93_I5N_08_17_2016_15_40_19_174	2019-08-26 21:39:16	E:/Aggression Videos/Bailey2/RI8D_R9_93_I5N_08_17_2016_15_40_19_174_1.avi	1079.630	30.0	No focal subject	8	541.832		STATE	841.032	899.733	58.701
RI8D_R9_93_I5N_08_17_2016_15_40_19_174	2019-08-26 21:39:16	E:/Aggression Videos/Bailey2/RI8D_R9_93_I5N_08_17_2016_15_40_19_174_1.avi	1079.630	30.0	No focal subject	1	541.851		STATE	841.051	847.201	6.150
RI8D_R9_93_I5N_08_17_2016_15_40_19_174	2019-08-26 21:39:16	E:/Aggression Videos/Bailey2/RI8D_R9_93_I5N_08_17_2016_15_40_19_174_1.avi	1079.630	30.0	No focal subject	6	552.375		STATE	851.575	858.201	6.626
RI8D_R9_93_I5N_08_17_2016_15_40_19_174	2019-08-26 21:39:16	E:/Aggression Videos/Bailey2/RI8D_R9_93_I5N_08_17_2016_15_40_19_174_1.avi	1079.630	30.0	No focal subject	1	562.701		STATE	861.901	874.850	12.949
RI8D_R9_93_I5N_08_17_2016_15_40_19_174	2019-08-26 21:39:16	E:/Aggression Videos/Bailey2/RI8D_R9_93_I5N_08_17_2016_15_40_19_174_1.avi	1079.630	30.0	No focal subject	1	581.2		STATE	880.400	888.051	7.651
RI8D_R9_93_I5N_08_17_2016_15_40_19_174	2019-08-26 21:39:16	E:/Aggression Videos/Bailey2/RI8D_R9_93_I5N_08_17_2016_15_40_19_174_1.avi	1079.630	30.0	No focal subject	1	595.882		STATE	895.082	896.126	1.044
RI8D_R9_93_I5N_08_17_2016_15_40_19_174	2019-08-26 21:39:16	E:/Aggression Videos/Bailey2/RI8D_R9_93_I5N_08_17_2016_15_40_19_174_1.avi	1079.630	30.0	No focal subject	2	691.633		STATE	990.833	991.359	0.526
RI8D_R9_93_I5N_08_17_2016_15_40_19_174	2019-08-26 21:39:16	E:/Aggression Videos/Bailey2/RI8D_R9_93_I5N_08_17_2016_15_40_19_174_1.avi	1079.630	30.0	No focal subject	2	724.359		STATE	1023.559	1029.184	5.625
						7

[truncated: 21 more sheets: 11D, 18A, 18B, 18C, 18D, 18E, 19A, 19C, 19E, 21B, 21E, 31C, 31E, 32D, 32E, Isa195A, Isa195B, Isa196A, Isa196B, Isa196C …]
