# Supplementary material for: Cerebellar Purkinje cell activity modulates aggressive behavior
Source: eLife. 2020 Apr 28;9:e53229. doi: 10.7554/eLife.53229 (PMC7202893; doi:10.7554/eLife.53229)
Supplement: Figure 3—source data 2. [file elife-53229-fig3-data2.xlsx]

## Sheet: Event Counts
	Assay	Attacks		Social			Attacks		Social
	Light	Off	On	Off	On		Off	On	Off	On
	44B	9	6	2	4		9	6	2	4
	45A	4	5	6	3		4	5	6	3
	46A	10	9	5	2		10	9	5	2
	47B	8	6	8	4		8	6	8	4
	51A	1	1	4	4		5.25	5	4.75	3.5
	51B	8	10	6	7
	51C	4	3	5	2
	51D	8	6	4	1
						AVG	7.25	6.2	5.15	3.3
						SEM	1.13468	0.734847	0.973396	0.374166
						P	0.203262		0.155717

## Sheet: 44B
Observation id	Observation date	Media file	Total length	FPS	Subject	Behavior	Behavioral category	Modifiers	Behavior type	Start (s)	Stop (s)	Duration (s)	Comment start	Comment stop
RI44B_R9_181_I3P_12_01_2016_15_40_19_174	2019-09-21 21:29:17	E:/Aggression Videos/From Chris/Newer Videos/RI44B_R9_181_I3P_12_01_2016_15_40_19_174_0.avi	906.630	30.0	No focal subject	0	2.242		POINT	302.275	302.275	NA
RI44B_R9_181_I3P_12_01_2016_15_40_19_174	2019-09-21 21:29:17	E:/Aggression Videos/From Chris/Newer Videos/RI44B_R9_181_I3P_12_01_2016_15_40_19_174_0.avi	906.630	30.0	No focal subject	2	4.368		STATE	304.401	313.600	9.199
RI44B_R9_181_I3P_12_01_2016_15_40_19_174	2019-09-21 21:29:17	E:/Aggression Videos/From Chris/Newer Videos/RI44B_R9_181_I3P_12_01_2016_15_40_19_174_0.avi	906.630	30.0	No focal subject	1	25.709		STATE	325.742	327.321	1.579
RI44B_R9_181_I3P_12_01_2016_15_40_19_174	2019-09-21 21:29:17	E:/Aggression Videos/From Chris/Newer Videos/RI44B_R9_181_I3P_12_01_2016_15_40_19_174_0.avi	906.630	30.0	No focal subject	1	51.601		STATE	351.634	353.459	1.825
RI44B_R9_181_I3P_12_01_2016_15_40_19_174	2019-09-21 21:29:17	E:/Aggression Videos/From Chris/Newer Videos/RI44B_R9_181_I3P_12_01_2016_15_40_19_174_0.avi	906.630	30.0	No focal subject	8	60		STATE	360.033	419.542	59.509
RI44B_R9_181_I3P_12_01_2016_15_40_19_174	2019-09-21 21:29:17	E:/Aggression Videos/From Chris/Newer Videos/RI44B_R9_181_I3P_12_01_2016_15_40_19_174_0.avi	906.630	30.0	No focal subject	2	65.279		STATE	365.312	367.658	2.346
RI44B_R9_181_I3P_12_01_2016_15_40_19_174	2019-09-21 21:29:17	E:/Aggression Videos/From Chris/Newer Videos/RI44B_R9_181_I3P_12_01_2016_15_40_19_174_0.avi	906.630	30.0	No focal subject	2	82.18		STATE	382.213	384.058	1.845
RI44B_R9_181_I3P_12_01_2016_15_40_19_174	2019-09-21 21:29:17	E:/Aggression Videos/From Chris/Newer Videos/RI44B_R9_181_I3P_12_01_2016_15_40_19_174_0.avi	906.630	30.0	No focal subject	2	87.15		STATE	387.183	390.033	2.850
RI44B_R9_181_I3P_12_01_2016_15_40_19_174	2019-09-21 21:29:17	E:/Aggression Videos/From Chris/Newer Videos/RI44B_R9_181_I3P_12_01_2016_15_40_19_174_0.avi	906.630	30.0	No focal subject	1	94.7		STATE	394.733	395.488	0.755
RI44B_R9_181_I3P_12_01_2016_15_40_19_174	2019-09-21 21:29:17	E:/Aggression Videos/From Chris/Newer Videos/RI44B_R9_181_I3P_12_01_2016_15_40_19_174_0.avi	906.630	30.0	No focal subject	6	104.359		STATE	404.392	413.317	8.925
RI44B_R9_181_I3P_12_01_2016_15_40_19_174	2019-09-21 21:29:17	E:/Aggression Videos/From Chris/Newer Videos/RI44B_R9_181_I3P_12_01_2016_15_40_19_174_0.avi	906.630	30.0	No focal subject	6	121.609		STATE	421.642	432.292	10.650
RI44B_R9_181_I3P_12_01_2016_15_40_19_174	2019-09-21 21:29:17	E:/Aggression Videos/From Chris/Newer Videos/RI44B_R9_181_I3P_12_01_2016_15_40_19_174_0.avi	906.630	30.0	No focal subject	4	136.189		STATE	436.222	437.826	1.604
RI44B_R9_181_I3P_12_01_2016_15_40_19_174	2019-09-21 21:29:17	E:/Aggression Videos/From Chris/Newer Videos/RI44B_R9_181_I3P_12_01_2016_15_40_19_174_0.avi	906.630	30.0	No focal subject	1	142.151		STATE	442.184	445.283	3.099
RI44B_R9_181_I3P_12_01_2016_15_40_19_174	2019-09-21 21:29:17	E:/Aggression Videos/From Chris/Newer Videos/RI44B_R9_181_I3P_12_01_2016_15_40_19_174_0.avi	906.630	30.0	No focal subject	6	150.701		STATE	450.734	468.909	18.175
RI44B_R9_181_I3P_12_01_2016_15_40_19_174	2019-09-21 21:29:17	E:/Aggression Videos/From Chris/Newer Videos/RI44B_R9_181_I3P_12_01_2016_15_40_19_174_0.avi	906.630	30.0	No focal subject	7	170.276		STATE	470.309	471.876	1.567
RI44B_R9_181_I3P_12_01_2016_15_40_19_174	2019-09-21 21:29:17	E:/Aggression Videos/From Chris/Newer Videos/RI44B_R9_181_I3P_12_01_2016_15_40_19_174_0.avi	906.630	30.0	No focal subject	7	175.4		STATE	475.433	480.558	5.125
RI44B_R9_181_I3P_12_01_2016_15_40_19_174	2019-09-21 21:29:17	E:/Aggression Videos/From Chris/Newer Videos/RI44B_R9_181_I3P_12_01_2016_15_40_19_174_0.avi	906.630	30.0	No focal subject	8	180.034		STATE	480.067	539.475	59.408
RI44B_R9_181_I3P_12_01_2016_15_40_19_174	2019-09-21 21:29:17	E:/Aggression Videos/From Chris/Newer Videos/RI44B_R9_181_I3P_12_01_2016_15_40_19_174_0.avi	906.630	30.0	No focal subject	6	180.825		STATE	480.858	482.184	1.326
RI44B_R9_181_I3P_12_01_2016_15_40_19_174	2019-09-21 21:29:17	E:/Aggression Videos/From Chris/Newer Videos/RI44B_R9_181_I3P_12_01_2016_15_40_19_174_0.avi	906.630	30.0	No focal subject	4	182.434		STATE	482.467	483.492	1.025
RI44B_R9_181_I3P_12_01_2016_15_40_19_174	2019-09-21 21:29:17	E:/Aggression Videos/From Chris/Newer Videos/RI44B_R9_181_I3P_12_01_2016_15_40_19_174_0.avi	906.630	30.0	No focal subject	1	217.558		STATE	517.591	519.123	1.532
RI44B_R9_181_I3P_12_01_2016_15_40_19_174	2019-09-21 21:29:17	E:/Aggression Videos/From Chris/Newer Videos/RI44B_R9_181_I3P_12_01_2016_15_40_19_174_0.avi	906.630	30.0	No focal subject	2	221.434		STATE	521.467	523.017	1.550
RI44B_R9_181_I3P_12_01_2016_15_40_19_174	2019-09-21 21:29:17	E:/Aggression Videos/From Chris/Newer Videos/RI44B_R9_181_I3P_12_01_2016_15_40_19_174_0.avi	906.630	30.0	No focal subject	2	254.143		STATE	554.176	558.654	4.478
RI44B_R9_181_I3P_12_01_2016_15_40_19_174	2019-09-21 21:29:17	E:/Aggression Videos/From Chris/Newer Videos/RI44B_R9_181_I3P_12_01_2016_15_40_19_174_0.avi	906.630	30.0	No focal subject	6	258.636		STATE	558.669	570.843	12.174
RI44B_R9_181_I3P_12_01_2016_15_40_19_174	2019-09-21 21:29:17	E:/Aggression Videos/From Chris/Newer Videos/RI44B_R9_181_I3P_12_01_2016_15_40_19_174_0.avi	906.630	30.0	No focal subject	6	281.885		STATE	581.918	588.193	6.275
RI44B_R9_181_I3P_12_01_2016_15_40_19_174	2019-09-21 21:29:17	E:/Aggression Videos/From Chris/Newer Videos/RI44B_R9_181_I3P_12_01_2016_15_40_19_174_0.avi	906.630	30.0	No focal subject	4	288.175		STATE	588.208	591.621	3.413
RI44B_R9_181_I3P_12_01_2016_15_40_19_174	2019-09-21 21:29:17	E:/Aggression Videos/From Chris/Newer Videos/RI44B_R9_181_I3P_12_01_2016_15_40_19_174_0.avi	906.630	30.0	No focal subject	8	300.2		STATE	600.233	659.500	59.267
RI44B_R9_181_I3P_12_01_2016_15_40_19_174	2019-09-21 21:29:17	E:/Aggression Videos/From Chris/Newer Videos/RI44B_R9_181_I3P_12_01_2016_15_40_19_174_0.avi	906.630	30.0	No focal subject	6	302.152		STATE	602.185	612.162	9.977
RI44B_R9_181_I3P_12_01_2016_15_40_19_174	2019-09-21 21:29:17	E:/Aggression Videos/From Chris/Newer Videos/RI44B_R9_181_I3P_12_01_2016_15_40_19_174_0.avi	906.630	30.0	No focal subject	4	312.901		STATE	612.934	613.984	1.050
RI44B_R9_181_I3P_12_01_2016_15_40_19_174	2019-09-21 21:29:17	E:/Aggression Videos/From Chris/Newer Videos/RI44B_R9_181_I3P_12_01_2016_15_40_19_174_0.avi	906.630	30.0	No focal subject	1	323.551		STATE	623.584	624.384	0.800
RI44B_R9_181_I3P_12_01_2016_15_40_19_174	2019-09-21 21:29:17	E:/Aggression Videos/From Chris/Newer Videos/RI44B_R9_181_I3P_12_01_2016_15_40_19_174_0.avi	906.630	30.0	No focal subject	1	330.135		STATE	630.168	631.742	1.574
RI44B_R9_181_I3P_12_01_2016_15_40_19_174	2019-09-21 21:29:17	E:/Aggression Videos/From Chris/Newer Videos/RI44B_R9_181_I3P_12_01_2016_15_40_19_174_0.avi	906.630	30.0	No focal subject	1	334.167		STATE	634.200	635.751	1.551
RI44B_R9_181_I3P_12_01_2016_15_40_19_174	2019-09-21 21:29:17	E:/Aggression Videos/From Chris/Newer Videos/RI44B_R9_181_I3P_12_01_2016_15_40_19_174_0.avi	906.630	30.0	No focal subject	1	359.567		STATE	659.600	671.900	12.300
RI44B_R9_181_I3P_12_01_2016_15_40_19_174	2019-09-21 21:29:17	E:/Aggression Videos/From Chris/Newer Videos/RI44B_R9_181_I3P_12_01_2016_15_40_19_174_0.avi	906.630	30.0	No focal subject	6	389.142		STATE	689.175	699.376	10.201
RI44B_R9_181_I3P_12_01_2016_15_40_19_174	2019-09-21 21:29:17	E:/Aggression Videos/From Chris/Newer Videos/RI44B_R9_181_I3P_12_01_2016_15_40_19_174_0.avi	906.630	30.0	No focal subject	7	399.609		STATE	699.642	701.166	1.524
RI44B_R9_181_I3P_12_01_2016_15_40_19_174	2019-09-21 21:29:17	E:/Aggression Videos/From Chris/Newer Videos/RI44B_R9_181_I3P_12_01_2016_15_40_19_174_0.avi	906.630	30.0	No focal subject	6	401.133		STATE	701.166	702.441	1.275
RI44B_R9_181_I3P_12_01_2016_15_40_19_174	2019-09-21 21:29:17	E:/Aggression Videos/From Chris/Newer Videos/RI44B_R9_181_I3P_12_01_2016_15_40_19_174_0.avi	906.630	30.0	No focal subject	6	404.858		STATE	704.891	706.967	2.076
RI44B_R9_181_I3P_12_01_2016_15_40_19_174	2019-09-21 21:29:17	E:/Aggression Videos/From Chris/Newer Videos/RI44B_R9_181_I3P_12_01_2016_15_40_19_174_0.avi	906.630	30.0	No focal subject	4	406.949		STATE	706.982	712.116	5.134
RI44B_R9_181_I3P_12_01_2016_15_40_19_174	2019-09-21 21:29:17	E:/Aggression Videos/From Chris/Newer Videos/RI44B_R9_181_I3P_12_01_2016_15_40_19_174_0.avi	906.630	30.0	No focal subject	6	412.158		STATE	712.191	714.016	1.825
RI44B_R9_181_I3P_12_01_2016_15_40_19_174	2019-09-21 21:29:17	E:/Aggression Videos/From Chris/Newer Videos/RI44B_R9_181_I3P_12_01_2016_15_40_19_174_0.avi	906.630	30.0	No focal subject	4	417.33		STATE	717.363	719.434	2.071
RI44B_R9_181_I3P_12_01_2016_15_40_19_174	2019-09-21 21:29:17	E:/Aggression Videos/From Chris/Newer Videos/RI44B_R9_181_I3P_12_01_2016_15_40_19_174_0.avi	906.630	30.0	No focal subject	8	420.333		STATE	720.366	779.579	59.213
RI44B_R9_181_I3P_12_01_2016_15_40_19_174	2019-09-21 21:29:17	E:/Aggression Videos/From Chris/Newer Videos/RI44B_R9_181_I3P_12_01_2016_15_40_19_174_0.avi	906.630	30.0	No focal subject	4	423.678		STATE	723.711	725.576	1.865
RI44B_R9_181_I3P_12_01_2016_15_40_19_174	2019-09-21 21:29:17	E:/Aggression Videos/From Chris/Newer Videos/RI44B_R9_181_I3P_12_01_2016_15_40_19_174_0.avi	906.630	30.0	No focal subject	7	431.455		STATE	731.488	733.788	2.300
RI44B_R9_181_I3P_12_01_2016_15_40_19_174	2019-09-21 21:29:17	E:/Aggression Videos/From Chris/Newer Videos/RI44B_R9_181_I3P_12_01_2016_15_40_19_174_0.avi	906.630	30.0	No focal subject	1	437.213		STATE	737.246	745.221	7.975
RI44B_R9_181_I3P_12_01_2016_15_40_19_174	2019-09-21 21:29:17	E:/Aggression Videos/From Chris/Newer Videos/RI44B_R9_181_I3P_12_01_2016_15_40_19_174_0.avi	906.630	30.0	No focal subject	4	450.885		STATE	750.918	753.278	2.360
RI44B_R9_181_I3P_12_01_2016_15_40_19_174	2019-09-21 21:29:17	E:/Aggression Videos/From Chris/Newer Videos/RI44B_R9_181_I3P_12_01_2016_15_40_19_174_0.avi	906.630	30.0	No focal subject	6	454.038		STATE	754.071	755.728	1.657
RI44B_R9_181_I3P_12_01_2016_15_40_19_174	2019-09-21 21:29:17	E:/Aggression Videos/From Chris/Newer Videos/RI44B_R9_181_I3P_12_01_2016_15_40_19_174_0.avi	906.630	30.0	No focal subject	1	456.196		STATE	756.229	758.853	2.624
RI44B_R9_181_I3P_12_01_2016_15_40_19_174	2019-09-21 21:29:17	E:/Aggression Videos/From Chris/Newer Videos/RI44B_R9_181_I3P_12_01_2016_15_40_19_174_0.avi	906.630	30.0	No focal subject	6	459.849		STATE	759.882	765.858	5.976
RI44B_R9_181_I3P_12_01_2016_15_40_19_174	2019-09-21 21:29:17	E:/Aggression Videos/From Chris/Newer Videos/RI44B_R9_181_I3P_12_01_2016_15_40_19_174_0.avi	906.630	30.0	No focal subject	1	472.624		STATE	772.657	792.882	20.225
RI44B_R9_181_I3P_12_01_2016_15_40_19_174	2019-09-21 21:29:17	E:/Aggression Videos/From Chris/Newer Videos/RI44B_R9_181_I3P_12_01_2016_15_40_19_174_0.avi	906.630	30.0	No focal subject	1	497.29		STATE	797.323	799.677	2.354
RI44B_R9_181_I3P_12_01_2016_15_40_19_174	2019-09-21 21:29:17	E:/Aggression Videos/From Chris/Newer Videos/RI44B_R9_181_I3P_12_01_2016_15_40_19_174_0.avi	906.630	30.0	No focal subject	1	504.643		STATE	804.676	806.505	1.829
RI44B_R9_181_I3P_12_01_2016_15_40_19_174	2019-09-21 21:29:17	E:/Aggression Videos/From Chris/Newer Videos/RI44B_R9_181_I3P_12_01_2016_15_40_19_174_0.avi	906.630	30.0	No focal subject	6	519.189		STATE	819.222	831.272	12.050
RI44B_R9_181_I3P_12_01_2016_15_40_19_174	2019-09-21 21:29:17	E:/Aggression Videos/From Chris/Newer Videos/RI44B_R9_181_I3P_12_01_2016_15_40_19_174_0.avi	906.630	30.0	No focal subject	4	532.048		STATE	832.081	832.856	0.775
RI44B_R9_181_I3P_12_01_2016_15_40_19_174	2019-09-21 21:29:17	E:/Aggression Videos/From Chris/Newer Videos/RI44B_R9_181_I3P_12_01_2016_15_40_19_174_0.avi	906.630	30.0	No focal subject	4	534.123		STATE	834.156	839.883	5.727
RI44B_R9_181_I3P_12_01_2016_15_40_19_174	2019-09-21 21:29:17	E:/Aggression Videos/From Chris/Newer Videos/RI44B_R9_181_I3P_12_01_2016_15_40_19_174_0.avi	906.630	30.0	No focal subject	8	540.546		STATE	840.579	899.820	59.241
RI44B_R9_181_I3P_12_01_2016_15_40_19_174	2019-09-21 21:29:17	E:/Aggression Videos/From Chris/Newer Videos/RI44B_R9_181_I3P_12_01_2016_15_40_19_174_0.avi	906.630	30.0	No focal subject	6	575.796		STATE	875.829	883.619	7.790
RI44B_R9_181_I3P_12_01_2016_15_40_19_174	2019-09-21 21:29:17	E:/Aggression Videos/From Chris/Newer Videos/RI44B_R9_181_I3P_12_01_2016_15_40_19_174_0.avi	906.630	30.0	No focal subject	4	584.381		STATE	884.414	885.988	1.574
RI44B_R9_181_I3P_12_01_2016_15_40_19_174	2019-09-21 21:29:17	E:/Aggression Videos/From Chris/Newer Videos/RI44B_R9_181_I3P_12_01_2016_15_40_19_174_0.avi	906.630	30.0	No focal subject	4	594.177		STATE	894.210	899.953	5.743
RI44B_R9_181_I3P_12_01_2016_15_40_19_174	2019-09-21 21:29:17	E:/Aggression Videos/From Chris/Newer Videos/RI44B_R9_181_I3P_12_01_2016_15_40_19_174_0.avi	906.630	30.0	No focal subject	1	601.687		STATE	901.720	904.746	3.026

## Sheet: 45A
Observation id	Observation date	Media file	Total length	FPS	Subject	Behavior	Behavioral category	Modifiers	Behavior type	Start (s)	Stop (s)	Duration (s)	Comment start	Comment stop
RI45A_R9_182_I4R_11_21_2016_15_40_19_174	2019-09-21 21:50:59	E:/Aggression Videos/From Chris/Newer Videos/RI45A_R9_182_I4R_11_21_2016_15_40_19_174_0.avi	1078.870	30.0	No focal subject	0	1.892		POINT	302.092	302.092	NA
RI45A_R9_182_I4R_11_21_2016_15_40_19_174	2019-09-21 21:50:59	E:/Aggression Videos/From Chris/Newer Videos/RI45A_R9_182_I4R_11_21_2016_15_40_19_174_0.avi	1078.870	30.0	No focal subject	2	13.442		STATE	313.642	323.017	9.375
RI45A_R9_182_I4R_11_21_2016_15_40_19_174	2019-09-21 21:50:59	E:/Aggression Videos/From Chris/Newer Videos/RI45A_R9_182_I4R_11_21_2016_15_40_19_174_0.avi	1078.870	30.0	No focal subject	2	28.018		STATE	328.218	339.093	10.875
RI45A_R9_182_I4R_11_21_2016_15_40_19_174	2019-09-21 21:50:59	E:/Aggression Videos/From Chris/Newer Videos/RI45A_R9_182_I4R_11_21_2016_15_40_19_174_0.avi	1078.870	30.0	No focal subject	2	40.217		STATE	340.417	354.950	14.533
RI45A_R9_182_I4R_11_21_2016_15_40_19_174	2019-09-21 21:50:59	E:/Aggression Videos/From Chris/Newer Videos/RI45A_R9_182_I4R_11_21_2016_15_40_19_174_0.avi	1078.870	30.0	No focal subject	2	56.867		STATE	357.067	370.651	13.584
RI45A_R9_182_I4R_11_21_2016_15_40_19_174	2019-09-21 21:50:59	E:/Aggression Videos/From Chris/Newer Videos/RI45A_R9_182_I4R_11_21_2016_15_40_19_174_0.avi	1078.870	30.0	No focal subject	8	65.034		STATE	365.234	419.742	54.508
RI45A_R9_182_I4R_11_21_2016_15_40_19_174	2019-09-21 21:50:59	E:/Aggression Videos/From Chris/Newer Videos/RI45A_R9_182_I4R_11_21_2016_15_40_19_174_0.avi	1078.870	30.0	No focal subject	6	70.975		STATE	371.175	373.246	2.071
RI45A_R9_182_I4R_11_21_2016_15_40_19_174	2019-09-21 21:50:59	E:/Aggression Videos/From Chris/Newer Videos/RI45A_R9_182_I4R_11_21_2016_15_40_19_174_0.avi	1078.870	30.0	No focal subject	1	115.718		STATE	415.918	417.197	1.279
RI45A_R9_182_I4R_11_21_2016_15_40_19_174	2019-09-21 21:50:59	E:/Aggression Videos/From Chris/Newer Videos/RI45A_R9_182_I4R_11_21_2016_15_40_19_174_0.avi	1078.870	30.0	No focal subject	1	128.426		STATE	428.626	429.151	0.525
RI45A_R9_182_I4R_11_21_2016_15_40_19_174	2019-09-21 21:50:59	E:/Aggression Videos/From Chris/Newer Videos/RI45A_R9_182_I4R_11_21_2016_15_40_19_174_0.avi	1078.870	30.0	No focal subject	6	142.5		STATE	442.700	449.930	7.230
RI45A_R9_182_I4R_11_21_2016_15_40_19_174	2019-09-21 21:50:59	E:/Aggression Videos/From Chris/Newer Videos/RI45A_R9_182_I4R_11_21_2016_15_40_19_174_0.avi	1078.870	30.0	No focal subject	6	176.767		STATE	476.967	486.383	9.416
RI45A_R9_182_I4R_11_21_2016_15_40_19_174	2019-09-21 21:50:59	E:/Aggression Videos/From Chris/Newer Videos/RI45A_R9_182_I4R_11_21_2016_15_40_19_174_0.avi	1078.870	30.0	No focal subject	8	179.951		STATE	480.151	540.083	59.932
RI45A_R9_182_I4R_11_21_2016_15_40_19_174	2019-09-21 21:50:59	E:/Aggression Videos/From Chris/Newer Videos/RI45A_R9_182_I4R_11_21_2016_15_40_19_174_0.avi	1078.870	30.0	No focal subject	6	193.93		STATE	494.130	500.730	6.600
RI45A_R9_182_I4R_11_21_2016_15_40_19_174	2019-09-21 21:50:59	E:/Aggression Videos/From Chris/Newer Videos/RI45A_R9_182_I4R_11_21_2016_15_40_19_174_0.avi	1078.870	30.0	No focal subject	1	210.2		STATE	510.400	510.775	0.375
RI45A_R9_182_I4R_11_21_2016_15_40_19_174	2019-09-21 21:50:59	E:/Aggression Videos/From Chris/Newer Videos/RI45A_R9_182_I4R_11_21_2016_15_40_19_174_0.avi	1078.870	30.0	No focal subject	6	217.201		STATE	517.401	527.354	9.953
RI45A_R9_182_I4R_11_21_2016_15_40_19_174	2019-09-21 21:50:59	E:/Aggression Videos/From Chris/Newer Videos/RI45A_R9_182_I4R_11_21_2016_15_40_19_174_0.avi	1078.870	30.0	No focal subject	6	244.288		STATE	544.488	550.600	6.112
RI45A_R9_182_I4R_11_21_2016_15_40_19_174	2019-09-21 21:50:59	E:/Aggression Videos/From Chris/Newer Videos/RI45A_R9_182_I4R_11_21_2016_15_40_19_174_0.avi	1078.870	30.0	No focal subject	7	250.901		STATE	551.101	553.601	2.500
RI45A_R9_182_I4R_11_21_2016_15_40_19_174	2019-09-21 21:50:59	E:/Aggression Videos/From Chris/Newer Videos/RI45A_R9_182_I4R_11_21_2016_15_40_19_174_0.avi	1078.870	30.0	No focal subject	6	262.016		STATE	562.216	571.782	9.566
RI45A_R9_182_I4R_11_21_2016_15_40_19_174	2019-09-21 21:50:59	E:/Aggression Videos/From Chris/Newer Videos/RI45A_R9_182_I4R_11_21_2016_15_40_19_174_0.avi	1078.870	30.0	No focal subject	1	279.98		STATE	580.180	581.755	1.575
RI45A_R9_182_I4R_11_21_2016_15_40_19_174	2019-09-21 21:50:59	E:/Aggression Videos/From Chris/Newer Videos/RI45A_R9_182_I4R_11_21_2016_15_40_19_174_0.avi	1078.870	30.0	No focal subject	1	287.055		STATE	587.255	588.825	1.570
RI45A_R9_182_I4R_11_21_2016_15_40_19_174	2019-09-21 21:50:59	E:/Aggression Videos/From Chris/Newer Videos/RI45A_R9_182_I4R_11_21_2016_15_40_19_174_0.avi	1078.870	30.0	No focal subject	8	299.993		STATE	600.193	660.067	59.874
RI45A_R9_182_I4R_11_21_2016_15_40_19_174	2019-09-21 21:50:59	E:/Aggression Videos/From Chris/Newer Videos/RI45A_R9_182_I4R_11_21_2016_15_40_19_174_0.avi	1078.870	30.0	No focal subject	1	302.201		STATE	602.401	603.476	1.075
RI45A_R9_182_I4R_11_21_2016_15_40_19_174	2019-09-21 21:50:59	E:/Aggression Videos/From Chris/Newer Videos/RI45A_R9_182_I4R_11_21_2016_15_40_19_174_0.avi	1078.870	30.0	No focal subject	1	317.809		STATE	618.009	618.908	0.899
RI45A_R9_182_I4R_11_21_2016_15_40_19_174	2019-09-21 21:50:59	E:/Aggression Videos/From Chris/Newer Videos/RI45A_R9_182_I4R_11_21_2016_15_40_19_174_0.avi	1078.870	30.0	No focal subject	2	331.383		STATE	631.583	634.434	2.851
RI45A_R9_182_I4R_11_21_2016_15_40_19_174	2019-09-21 21:50:59	E:/Aggression Videos/From Chris/Newer Videos/RI45A_R9_182_I4R_11_21_2016_15_40_19_174_0.avi	1078.870	30.0	No focal subject	1	352.109		STATE	652.309	653.359	1.050
RI45A_R9_182_I4R_11_21_2016_15_40_19_174	2019-09-21 21:50:59	E:/Aggression Videos/From Chris/Newer Videos/RI45A_R9_182_I4R_11_21_2016_15_40_19_174_0.avi	1078.870	30.0	No focal subject	1	377.461		STATE	677.661	679.209	1.548
RI45A_R9_182_I4R_11_21_2016_15_40_19_174	2019-09-21 21:50:59	E:/Aggression Videos/From Chris/Newer Videos/RI45A_R9_182_I4R_11_21_2016_15_40_19_174_0.avi	1078.870	30.0	No focal subject	2	388.259		STATE	688.459	693.287	4.828
RI45A_R9_182_I4R_11_21_2016_15_40_19_174	2019-09-21 21:50:59	E:/Aggression Videos/From Chris/Newer Videos/RI45A_R9_182_I4R_11_21_2016_15_40_19_174_0.avi	1078.870	30.0	No focal subject	1	397.591		STATE	697.791	699.913	2.122
RI45A_R9_182_I4R_11_21_2016_15_40_19_174	2019-09-21 21:50:59	E:/Aggression Videos/From Chris/Newer Videos/RI45A_R9_182_I4R_11_21_2016_15_40_19_174_0.avi	1078.870	30.0	No focal subject	8	420.083		STATE	720.283	780.117	59.834
RI45A_R9_182_I4R_11_21_2016_15_40_19_174	2019-09-21 21:50:59	E:/Aggression Videos/From Chris/Newer Videos/RI45A_R9_182_I4R_11_21_2016_15_40_19_174_0.avi	1078.870	30.0	No focal subject	1	425.458		STATE	725.658	739.758	14.100
RI45A_R9_182_I4R_11_21_2016_15_40_19_174	2019-09-21 21:50:59	E:/Aggression Videos/From Chris/Newer Videos/RI45A_R9_182_I4R_11_21_2016_15_40_19_174_0.avi	1078.870	30.0	No focal subject	2	452.859		STATE	753.059	754.909	1.850
RI45A_R9_182_I4R_11_21_2016_15_40_19_174	2019-09-21 21:50:59	E:/Aggression Videos/From Chris/Newer Videos/RI45A_R9_182_I4R_11_21_2016_15_40_19_174_0.avi	1078.870	30.0	No focal subject	2	463.433		STATE	763.633	772.333	8.700
RI45A_R9_182_I4R_11_21_2016_15_40_19_174	2019-09-21 21:50:59	E:/Aggression Videos/From Chris/Newer Videos/RI45A_R9_182_I4R_11_21_2016_15_40_19_174_0.avi	1078.870	30.0	No focal subject	1	472.133		STATE	772.333	773.933	1.600
RI45A_R9_182_I4R_11_21_2016_15_40_19_174	2019-09-21 21:50:59	E:/Aggression Videos/From Chris/Newer Videos/RI45A_R9_182_I4R_11_21_2016_15_40_19_174_0.avi	1078.870	30.0	No focal subject	1	474.866		STATE	775.066	776.841	1.775
RI45A_R9_182_I4R_11_21_2016_15_40_19_174	2019-09-21 21:50:59	E:/Aggression Videos/From Chris/Newer Videos/RI45A_R9_182_I4R_11_21_2016_15_40_19_174_0.avi	1078.870	30.0	No focal subject	2	493.043		STATE	793.243	797.891	4.648
RI45A_R9_182_I4R_11_21_2016_15_40_19_174	2019-09-21 21:50:59	E:/Aggression Videos/From Chris/Newer Videos/RI45A_R9_182_I4R_11_21_2016_15_40_19_174_0.avi	1078.870	30.0	No focal subject	1	520.174		STATE	820.374	822.200	1.826
RI45A_R9_182_I4R_11_21_2016_15_40_19_174	2019-09-21 21:50:59	E:/Aggression Videos/From Chris/Newer Videos/RI45A_R9_182_I4R_11_21_2016_15_40_19_174_0.avi	1078.870	30.0	No focal subject	4	535.999		STATE	836.199	837.242	1.043
RI45A_R9_182_I4R_11_21_2016_15_40_19_174	2019-09-21 21:50:59	E:/Aggression Videos/From Chris/Newer Videos/RI45A_R9_182_I4R_11_21_2016_15_40_19_174_0.avi	1078.870	30.0	No focal subject	8	540.125		STATE	840.325	900.483	60.158
RI45A_R9_182_I4R_11_21_2016_15_40_19_174	2019-09-21 21:50:59	E:/Aggression Videos/From Chris/Newer Videos/RI45A_R9_182_I4R_11_21_2016_15_40_19_174_0.avi	1078.870	30.0	No focal subject	6	550.825		STATE	851.025	865.849	14.824
RI45A_R9_182_I4R_11_21_2016_15_40_19_174	2019-09-21 21:50:59	E:/Aggression Videos/From Chris/Newer Videos/RI45A_R9_182_I4R_11_21_2016_15_40_19_174_0.avi	1078.870	30.0	No focal subject	6	597.037		STATE	897.237	909.083	11.846
RI45A_R9_182_I4R_11_21_2016_15_40_19_174	2019-09-21 21:50:59	E:/Aggression Videos/From Chris/Newer Videos/RI45A_R9_182_I4R_11_21_2016_15_40_19_174_0.avi	1078.870	30.0	No focal subject	1	630.905		STATE	931.105	933.753	2.648
RI45A_R9_182_I4R_11_21_2016_15_40_19_174	2019-09-21 21:50:59	E:/Aggression Videos/From Chris/Newer Videos/RI45A_R9_182_I4R_11_21_2016_15_40_19_174_0.avi	1078.870	30.0	No focal subject	1	640.349		STATE	940.549	942.102	1.553
RI45A_R9_182_I4R_11_21_2016_15_40_19_174	2019-09-21 21:50:59	E:/Aggression Videos/From Chris/Newer Videos/RI45A_R9_182_I4R_11_21_2016_15_40_19_174_0.avi	1078.870	30.0	No focal subject	1	653.228		STATE	953.428	958.655	5.227
RI45A_R9_182_I4R_11_21_2016_15_40_19_174	2019-09-21 21:50:59	E:/Aggression Videos/From Chris/Newer Videos/RI45A_R9_182_I4R_11_21_2016_15_40_19_174_0.avi	1078.870	30.0	No focal subject	1	671.927		STATE	972.127	987.357	15.230
RI45A_R9_182_I4R_11_21_2016_15_40_19_174	2019-09-21 21:50:59	E:/Aggression Videos/From Chris/Newer Videos/RI45A_R9_182_I4R_11_21_2016_15_40_19_174_0.avi	1078.870	30.0	No focal subject	1	690.791		STATE	990.991	1000.591	9.600
RI45A_R9_182_I4R_11_21_2016_15_40_19_174	2019-09-21 21:50:59	E:/Aggression Videos/From Chris/Newer Videos/RI45A_R9_182_I4R_11_21_2016_15_40_19_174_0.avi	1078.870	30.0	No focal subject	1	701.641		STATE	1001.841	1003.390	1.549
RI45A_R9_182_I4R_11_21_2016_15_40_19_174	2019-09-21 21:50:59	E:/Aggression Videos/From Chris/Newer Videos/RI45A_R9_182_I4R_11_21_2016_15_40_19_174_0.avi	1078.870	30.0	No focal subject	1	707.041		STATE	1007.241	1008.015	0.774
RI45A_R9_182_I4R_11_21_2016_15_40_19_174	2019-09-21 21:50:59	E:/Aggression Videos/From Chris/Newer Videos/RI45A_R9_182_I4R_11_21_2016_15_40_19_174_0.avi	1078.870	30.0	No focal subject	1	731.766		STATE	1031.966	1032.766	0.800
RI45A_R9_182_I4R_11_21_2016_15_40_19_174	2019-09-21 21:50:59	E:/Aggression Videos/From Chris/Newer Videos/RI45A_R9_182_I4R_11_21_2016_15_40_19_174_0.avi	1078.870	30.0	No focal subject	2	742.865		STATE	1043.065	1045.690	2.625
RI45A_R9_182_I4R_11_21_2016_15_40_19_174	2019-09-21 21:50:59	E:/Aggression Videos/From Chris/Newer Videos/RI45A_R9_182_I4R_11_21_2016_15_40_19_174_0.avi	1078.870	30.0	No focal subject	1	775.916		STATE	1076.116	1077.566	1.450

## Sheet: 46A
Observation id	Observation date	Media file	Total length	FPS	Subject	Behavior	Behavioral category	Modifiers	Behavior type	Start (s)	Stop (s)	Duration (s)	Comment start	Comment stop
RI46A_R9_184_I1S_11_28_2016_15_40_19_174	2019-09-23 20:32:38	E:/Aggression Videos/From Chris/Newer Videos/RI46A_R9_184_I1S_11_28_2016_15_40_19_174_0.avi	951.900	30.0	No focal subject	0	0.748		POINT	300.816	300.816	NA
RI46A_R9_184_I1S_11_28_2016_15_40_19_174	2019-09-23 20:32:38	E:/Aggression Videos/From Chris/Newer Videos/RI46A_R9_184_I1S_11_28_2016_15_40_19_174_0.avi	951.900	30.0	No focal subject	3	7.95		STATE	308.018	308.725	0.707
RI46A_R9_184_I1S_11_28_2016_15_40_19_174	2019-09-23 20:32:38	E:/Aggression Videos/From Chris/Newer Videos/RI46A_R9_184_I1S_11_28_2016_15_40_19_174_0.avi	951.900	30.0	No focal subject	3	12.691		STATE	312.759	313.535	0.776
RI46A_R9_184_I1S_11_28_2016_15_40_19_174	2019-09-23 20:32:38	E:/Aggression Videos/From Chris/Newer Videos/RI46A_R9_184_I1S_11_28_2016_15_40_19_174_0.avi	951.900	30.0	No focal subject	2	23.066		STATE	323.134	397.746	74.612
RI46A_R9_184_I1S_11_28_2016_15_40_19_174	2019-09-23 20:32:38	E:/Aggression Videos/From Chris/Newer Videos/RI46A_R9_184_I1S_11_28_2016_15_40_19_174_0.avi	951.900	30.0	No focal subject	8	60		STATE	360.068	420.226	60.158
RI46A_R9_184_I1S_11_28_2016_15_40_19_174	2019-09-23 20:32:38	E:/Aggression Videos/From Chris/Newer Videos/RI46A_R9_184_I1S_11_28_2016_15_40_19_174_0.avi	951.900	30.0	No focal subject	2	107.1		STATE	407.168	420.268	13.100
RI46A_R9_184_I1S_11_28_2016_15_40_19_174	2019-09-23 20:32:38	E:/Aggression Videos/From Chris/Newer Videos/RI46A_R9_184_I1S_11_28_2016_15_40_19_174_0.avi	951.900	30.0	No focal subject	1	120.2		STATE	420.268	420.542	0.274
RI46A_R9_184_I1S_11_28_2016_15_40_19_174	2019-09-23 20:32:38	E:/Aggression Videos/From Chris/Newer Videos/RI46A_R9_184_I1S_11_28_2016_15_40_19_174_0.avi	951.900	30.0	No focal subject	1	122.598		STATE	422.666	428.809	6.143
RI46A_R9_184_I1S_11_28_2016_15_40_19_174	2019-09-23 20:32:38	E:/Aggression Videos/From Chris/Newer Videos/RI46A_R9_184_I1S_11_28_2016_15_40_19_174_0.avi	951.900	30.0	No focal subject	2	130.834		STATE	430.902	441.226	10.324
RI46A_R9_184_I1S_11_28_2016_15_40_19_174	2019-09-23 20:32:38	E:/Aggression Videos/From Chris/Newer Videos/RI46A_R9_184_I1S_11_28_2016_15_40_19_174_0.avi	951.900	30.0	No focal subject	2	147.633		STATE	447.701	449.752	2.051
RI46A_R9_184_I1S_11_28_2016_15_40_19_174	2019-09-23 20:32:38	E:/Aggression Videos/From Chris/Newer Videos/RI46A_R9_184_I1S_11_28_2016_15_40_19_174_0.avi	951.900	30.0	No focal subject	2	155.834		STATE	455.902	459.026	3.124
RI46A_R9_184_I1S_11_28_2016_15_40_19_174	2019-09-23 20:32:38	E:/Aggression Videos/From Chris/Newer Videos/RI46A_R9_184_I1S_11_28_2016_15_40_19_174_0.avi	951.900	30.0	No focal subject	2	167.034		STATE	467.102	478.109	11.007
RI46A_R9_184_I1S_11_28_2016_15_40_19_174	2019-09-23 20:32:38	E:/Aggression Videos/From Chris/Newer Videos/RI46A_R9_184_I1S_11_28_2016_15_40_19_174_0.avi	951.900	30.0	No focal subject	8	180.251		STATE	480.319	540.293	59.974
RI46A_R9_184_I1S_11_28_2016_15_40_19_174	2019-09-23 20:32:38	E:/Aggression Videos/From Chris/Newer Videos/RI46A_R9_184_I1S_11_28_2016_15_40_19_174_0.avi	951.900	30.0	No focal subject	2	188.579		STATE	488.647	495.018	6.371
RI46A_R9_184_I1S_11_28_2016_15_40_19_174	2019-09-23 20:32:38	E:/Aggression Videos/From Chris/Newer Videos/RI46A_R9_184_I1S_11_28_2016_15_40_19_174_0.avi	951.900	30.0	No focal subject	1	225.233		STATE	525.301	525.552	0.251
RI46A_R9_184_I1S_11_28_2016_15_40_19_174	2019-09-23 20:32:38	E:/Aggression Videos/From Chris/Newer Videos/RI46A_R9_184_I1S_11_28_2016_15_40_19_174_0.avi	951.900	30.0	No focal subject	3	234.576		STATE	534.644	535.668	1.024
RI46A_R9_184_I1S_11_28_2016_15_40_19_174	2019-09-23 20:32:38	E:/Aggression Videos/From Chris/Newer Videos/RI46A_R9_184_I1S_11_28_2016_15_40_19_174_0.avi	951.900	30.0	No focal subject	7	242.301		STATE	542.369	549.419	7.050
RI46A_R9_184_I1S_11_28_2016_15_40_19_174	2019-09-23 20:32:38	E:/Aggression Videos/From Chris/Newer Videos/RI46A_R9_184_I1S_11_28_2016_15_40_19_174_0.avi	951.900	30.0	No focal subject	1	269.143		STATE	569.211	572.539	3.328
RI46A_R9_184_I1S_11_28_2016_15_40_19_174	2019-09-23 20:32:38	E:/Aggression Videos/From Chris/Newer Videos/RI46A_R9_184_I1S_11_28_2016_15_40_19_174_0.avi	951.900	30.0	No focal subject	7	284.342		STATE	584.410	590.377	5.967
RI46A_R9_184_I1S_11_28_2016_15_40_19_174	2019-09-23 20:32:38	E:/Aggression Videos/From Chris/Newer Videos/RI46A_R9_184_I1S_11_28_2016_15_40_19_174_0.avi	951.900	30.0	No focal subject	5	291.094		STATE	591.162	591.926	0.764
RI46A_R9_184_I1S_11_28_2016_15_40_19_174	2019-09-23 20:32:38	E:/Aggression Videos/From Chris/Newer Videos/RI46A_R9_184_I1S_11_28_2016_15_40_19_174_0.avi	951.900	30.0	No focal subject	6	291.858		STATE	591.926	594.660	2.734
RI46A_R9_184_I1S_11_28_2016_15_40_19_174	2019-09-23 20:32:38	E:/Aggression Videos/From Chris/Newer Videos/RI46A_R9_184_I1S_11_28_2016_15_40_19_174_0.avi	951.900	30.0	No focal subject	4	294.592		STATE	594.660	595.185	0.525
RI46A_R9_184_I1S_11_28_2016_15_40_19_174	2019-09-23 20:32:38	E:/Aggression Videos/From Chris/Newer Videos/RI46A_R9_184_I1S_11_28_2016_15_40_19_174_0.avi	951.900	30.0	No focal subject	5	295.392		STATE	595.460	596.460	1.000
RI46A_R9_184_I1S_11_28_2016_15_40_19_174	2019-09-23 20:32:38	E:/Aggression Videos/From Chris/Newer Videos/RI46A_R9_184_I1S_11_28_2016_15_40_19_174_0.avi	951.900	30.0	No focal subject	6	296.392		STATE	596.460	600.135	3.675
RI46A_R9_184_I1S_11_28_2016_15_40_19_174	2019-09-23 20:32:38	E:/Aggression Videos/From Chris/Newer Videos/RI46A_R9_184_I1S_11_28_2016_15_40_19_174_0.avi	951.900	30.0	No focal subject	8	300.594		STATE	600.662	660.693	60.031
RI46A_R9_184_I1S_11_28_2016_15_40_19_174	2019-09-23 20:32:38	E:/Aggression Videos/From Chris/Newer Videos/RI46A_R9_184_I1S_11_28_2016_15_40_19_174_0.avi	951.900	30.0	No focal subject	1	301.684		STATE	601.752	602.535	0.783
RI46A_R9_184_I1S_11_28_2016_15_40_19_174	2019-09-23 20:32:38	E:/Aggression Videos/From Chris/Newer Videos/RI46A_R9_184_I1S_11_28_2016_15_40_19_174_0.avi	951.900	30.0	No focal subject	1	304.074		STATE	604.142	605.168	1.026
RI46A_R9_184_I1S_11_28_2016_15_40_19_174	2019-09-23 20:32:38	E:/Aggression Videos/From Chris/Newer Videos/RI46A_R9_184_I1S_11_28_2016_15_40_19_174_0.avi	951.900	30.0	No focal subject	6	311.366		STATE	611.434	621.760	10.326
RI46A_R9_184_I1S_11_28_2016_15_40_19_174	2019-09-23 20:32:38	E:/Aggression Videos/From Chris/Newer Videos/RI46A_R9_184_I1S_11_28_2016_15_40_19_174_0.avi	951.900	30.0	No focal subject	4	322.774		STATE	622.842	624.667	1.825
RI46A_R9_184_I1S_11_28_2016_15_40_19_174	2019-09-23 20:32:38	E:/Aggression Videos/From Chris/Newer Videos/RI46A_R9_184_I1S_11_28_2016_15_40_19_174_0.avi	951.900	30.0	No focal subject	6	326.375		STATE	626.443	630.942	4.499
RI46A_R9_184_I1S_11_28_2016_15_40_19_174	2019-09-23 20:32:38	E:/Aggression Videos/From Chris/Newer Videos/RI46A_R9_184_I1S_11_28_2016_15_40_19_174_0.avi	951.900	30.0	No focal subject	6	337.025		STATE	637.093	645.318	8.225
RI46A_R9_184_I1S_11_28_2016_15_40_19_174	2019-09-23 20:32:38	E:/Aggression Videos/From Chris/Newer Videos/RI46A_R9_184_I1S_11_28_2016_15_40_19_174_0.avi	951.900	30.0	No focal subject	6	355.783		STATE	655.851	662.558	6.707
RI46A_R9_184_I1S_11_28_2016_15_40_19_174	2019-09-23 20:32:38	E:/Aggression Videos/From Chris/Newer Videos/RI46A_R9_184_I1S_11_28_2016_15_40_19_174_0.avi	951.900	30.0	No focal subject	4	362.505		STATE	662.573	664.117	1.544
RI46A_R9_184_I1S_11_28_2016_15_40_19_174	2019-09-23 20:32:38	E:/Aggression Videos/From Chris/Newer Videos/RI46A_R9_184_I1S_11_28_2016_15_40_19_174_0.avi	951.900	30.0	No focal subject	6	364.825		STATE	664.893	670.893	6.000
RI46A_R9_184_I1S_11_28_2016_15_40_19_174	2019-09-23 20:32:38	E:/Aggression Videos/From Chris/Newer Videos/RI46A_R9_184_I1S_11_28_2016_15_40_19_174_0.avi	951.900	30.0	No focal subject	6	373.101		STATE	673.169	674.933	1.764
RI46A_R9_184_I1S_11_28_2016_15_40_19_174	2019-09-23 20:32:38	E:/Aggression Videos/From Chris/Newer Videos/RI46A_R9_184_I1S_11_28_2016_15_40_19_174_0.avi	951.900	30.0	No focal subject	4	374.88		STATE	674.948	679.659	4.711
RI46A_R9_184_I1S_11_28_2016_15_40_19_174	2019-09-23 20:32:38	E:/Aggression Videos/From Chris/Newer Videos/RI46A_R9_184_I1S_11_28_2016_15_40_19_174_0.avi	951.900	30.0	No focal subject	6	380.091		STATE	680.159	691.360	11.201
RI46A_R9_184_I1S_11_28_2016_15_40_19_174	2019-09-23 20:32:38	E:/Aggression Videos/From Chris/Newer Videos/RI46A_R9_184_I1S_11_28_2016_15_40_19_174_0.avi	951.900	30.0	No focal subject	4	391.292		STATE	691.360	693.534	2.174
RI46A_R9_184_I1S_11_28_2016_15_40_19_174	2019-09-23 20:32:38	E:/Aggression Videos/From Chris/Newer Videos/RI46A_R9_184_I1S_11_28_2016_15_40_19_174_0.avi	951.900	30.0	No focal subject	6	402.191		STATE	702.259	712.260	10.001
RI46A_R9_184_I1S_11_28_2016_15_40_19_174	2019-09-23 20:32:38	E:/Aggression Videos/From Chris/Newer Videos/RI46A_R9_184_I1S_11_28_2016_15_40_19_174_0.avi	951.900	30.0	No focal subject	8	420.834		STATE	720.902	780.460	59.558
RI46A_R9_184_I1S_11_28_2016_15_40_19_174	2019-09-23 20:32:38	E:/Aggression Videos/From Chris/Newer Videos/RI46A_R9_184_I1S_11_28_2016_15_40_19_174_0.avi	951.900	30.0	No focal subject	1	425.258		STATE	725.326	726.101	0.775
RI46A_R9_184_I1S_11_28_2016_15_40_19_174	2019-09-23 20:32:38	E:/Aggression Videos/From Chris/Newer Videos/RI46A_R9_184_I1S_11_28_2016_15_40_19_174_0.avi	951.900	30.0	No focal subject	1	449.534		STATE	749.602	750.603	1.001
RI46A_R9_184_I1S_11_28_2016_15_40_19_174	2019-09-23 20:32:38	E:/Aggression Videos/From Chris/Newer Videos/RI46A_R9_184_I1S_11_28_2016_15_40_19_174_0.avi	951.900	30.0	No focal subject	6	457.685		STATE	757.753	765.535	7.782
RI46A_R9_184_I1S_11_28_2016_15_40_19_174	2019-09-23 20:32:38	E:/Aggression Videos/From Chris/Newer Videos/RI46A_R9_184_I1S_11_28_2016_15_40_19_174_0.avi	951.900	30.0	No focal subject	6	471.545		STATE	771.613	772.984	1.371
RI46A_R9_184_I1S_11_28_2016_15_40_19_174	2019-09-23 20:32:38	E:/Aggression Videos/From Chris/Newer Videos/RI46A_R9_184_I1S_11_28_2016_15_40_19_174_0.avi	951.900	30.0	No focal subject	4	473.2		STATE	773.268	776.292	3.024
RI46A_R9_184_I1S_11_28_2016_15_40_19_174	2019-09-23 20:32:38	E:/Aggression Videos/From Chris/Newer Videos/RI46A_R9_184_I1S_11_28_2016_15_40_19_174_0.avi	951.900	30.0	No focal subject	6	481.375		STATE	781.443	781.959	0.516
RI46A_R9_184_I1S_11_28_2016_15_40_19_174	2019-09-23 20:32:38	E:/Aggression Videos/From Chris/Newer Videos/RI46A_R9_184_I1S_11_28_2016_15_40_19_174_0.avi	951.900	30.0	No focal subject	4	482.391		STATE	782.459	785.884	3.425
RI46A_R9_184_I1S_11_28_2016_15_40_19_174	2019-09-23 20:32:38	E:/Aggression Videos/From Chris/Newer Videos/RI46A_R9_184_I1S_11_28_2016_15_40_19_174_0.avi	951.900	30.0	No focal subject	1	503.567		STATE	803.635	804.043	0.408
RI46A_R9_184_I1S_11_28_2016_15_40_19_174	2019-09-23 20:32:38	E:/Aggression Videos/From Chris/Newer Videos/RI46A_R9_184_I1S_11_28_2016_15_40_19_174_0.avi	951.900	30.0	No focal subject	6	508.139		STATE	808.207	812.602	4.395
RI46A_R9_184_I1S_11_28_2016_15_40_19_174	2019-09-23 20:32:38	E:/Aggression Videos/From Chris/Newer Videos/RI46A_R9_184_I1S_11_28_2016_15_40_19_174_0.avi	951.900	30.0	No focal subject	4	512.934		STATE	813.002	815.317	2.315
RI46A_R9_184_I1S_11_28_2016_15_40_19_174	2019-09-23 20:32:38	E:/Aggression Videos/From Chris/Newer Videos/RI46A_R9_184_I1S_11_28_2016_15_40_19_174_0.avi	951.900	30.0	No focal subject	6	515.499		STATE	815.567	820.243	4.676
RI46A_R9_184_I1S_11_28_2016_15_40_19_174	2019-09-23 20:32:38	E:/Aggression Videos/From Chris/Newer Videos/RI46A_R9_184_I1S_11_28_2016_15_40_19_174_0.avi	951.900	30.0	No focal subject	1	535.475		STATE	835.543	840.700	5.157
RI46A_R9_184_I1S_11_28_2016_15_40_19_174	2019-09-23 20:32:38	E:/Aggression Videos/From Chris/Newer Videos/RI46A_R9_184_I1S_11_28_2016_15_40_19_174_0.avi	951.900	30.0	No focal subject	8	540.899		STATE	840.967	900.209	59.242
RI46A_R9_184_I1S_11_28_2016_15_40_19_174	2019-09-23 20:32:38	E:/Aggression Videos/From Chris/Newer Videos/RI46A_R9_184_I1S_11_28_2016_15_40_19_174_0.avi	951.900	30.0	No focal subject	6	555.492		STATE	855.560	857.820	2.260
RI46A_R9_184_I1S_11_28_2016_15_40_19_174	2019-09-23 20:32:38	E:/Aggression Videos/From Chris/Newer Videos/RI46A_R9_184_I1S_11_28_2016_15_40_19_174_0.avi	951.900	30.0	No focal subject	6	578.742		STATE	878.810	881.836	3.026
RI46A_R9_184_I1S_11_28_2016_15_40_19_174	2019-09-23 20:32:38	E:/Aggression Videos/From Chris/Newer Videos/RI46A_R9_184_I1S_11_28_2016_15_40_19_174_0.avi	951.900	30.0	No focal subject	4	581.768		STATE	881.836	883.755	1.919
RI46A_R9_184_I1S_11_28_2016_15_40_19_174	2019-09-23 20:32:38	E:/Aggression Videos/From Chris/Newer Videos/RI46A_R9_184_I1S_11_28_2016_15_40_19_174_0.avi	951.900	30.0	No focal subject	6	588.375		STATE	888.443	899.019	10.576
RI46A_R9_184_I1S_11_28_2016_15_40_19_174	2019-09-23 20:32:38	E:/Aggression Videos/From Chris/Newer Videos/RI46A_R9_184_I1S_11_28_2016_15_40_19_174_0.avi	951.900	30.0	No focal subject	6	600.95		STATE	901.018	903.068	2.050
RI46A_R9_184_I1S_11_28_2016_15_40_19_174	2019-09-23 20:32:38	E:/Aggression Videos/From Chris/Newer Videos/RI46A_R9_184_I1S_11_28_2016_15_40_19_174_0.avi	951.900	30.0	No focal subject	6	605.392		STATE	905.460	915.085	9.625
RI46A_R9_184_I1S_11_28_2016_15_40_19_174	2019-09-23 20:32:38	E:/Aggression Videos/From Chris/Newer Videos/RI46A_R9_184_I1S_11_28_2016_15_40_19_174_0.avi	951.900	30.0	No focal subject	1	616.608		STATE	916.676	917.235	0.559
RI46A_R9_184_I1S_11_28_2016_15_40_19_174	2019-09-23 20:32:38	E:/Aggression Videos/From Chris/Newer Videos/RI46A_R9_184_I1S_11_28_2016_15_40_19_174_0.avi	951.900	30.0	No focal subject	6	642.008		STATE	942.076	946.776	4.700
RI46A_R9_184_I1S_11_28_2016_15_40_19_174	2019-09-23 20:32:38	E:/Aggression Videos/From Chris/Newer Videos/RI46A_R9_184_I1S_11_28_2016_15_40_19_174_0.avi	951.900	30.0	No focal subject	6	649.283		STATE	949.351	951.810	2.459

## Sheet: 47B
Observation id	Observation date	Media file	Total length	FPS	Subject	Behavior	Behavioral category	Modifiers	Behavior type	Start (s)	Stop (s)	Duration (s)	Comment start	Comment stop
RI47B_R9_185_I1Q_12_02_2016_15_40_19_174	2019-09-23 21:02:13	E:/Aggression Videos/From Chris/Newer Videos/RI47B_R9_185_I1Q_12_02_2016_15_40_19_174_0.avi	1027.570	30.0	No focal subject	0	0.926		POINT	301.283	301.283	NA
RI47B_R9_185_I1Q_12_02_2016_15_40_19_174	2019-09-23 21:02:13	E:/Aggression Videos/From Chris/Newer Videos/RI47B_R9_185_I1Q_12_02_2016_15_40_19_174_0.avi	1027.570	30.0	No focal subject	2	3.801		STATE	304.158	317.891	13.733
RI47B_R9_185_I1Q_12_02_2016_15_40_19_174	2019-09-23 21:02:13	E:/Aggression Videos/From Chris/Newer Videos/RI47B_R9_185_I1Q_12_02_2016_15_40_19_174_0.avi	1027.570	30.0	No focal subject	2	20.951		STATE	321.308	327.701	6.393
RI47B_R9_185_I1Q_12_02_2016_15_40_19_174	2019-09-23 21:02:13	E:/Aggression Videos/From Chris/Newer Videos/RI47B_R9_185_I1Q_12_02_2016_15_40_19_174_0.avi	1027.570	30.0	No focal subject	6	28.144		STATE	328.501	331.008	2.507
RI47B_R9_185_I1Q_12_02_2016_15_40_19_174	2019-09-23 21:02:13	E:/Aggression Videos/From Chris/Newer Videos/RI47B_R9_185_I1Q_12_02_2016_15_40_19_174_0.avi	1027.570	30.0	No focal subject	6	33.952		STATE	334.309	337.134	2.825
RI47B_R9_185_I1Q_12_02_2016_15_40_19_174	2019-09-23 21:02:13	E:/Aggression Videos/From Chris/Newer Videos/RI47B_R9_185_I1Q_12_02_2016_15_40_19_174_0.avi	1027.570	30.0	No focal subject	6	40.126		STATE	340.483	345.933	5.450
RI47B_R9_185_I1Q_12_02_2016_15_40_19_174	2019-09-23 21:02:13	E:/Aggression Videos/From Chris/Newer Videos/RI47B_R9_185_I1Q_12_02_2016_15_40_19_174_0.avi	1027.570	30.0	No focal subject	2	50.802		STATE	351.159	356.659	5.500
RI47B_R9_185_I1Q_12_02_2016_15_40_19_174	2019-09-23 21:02:13	E:/Aggression Videos/From Chris/Newer Videos/RI47B_R9_185_I1Q_12_02_2016_15_40_19_174_0.avi	1027.570	30.0	No focal subject	8	60		STATE	360.357	421.408	61.051
RI47B_R9_185_I1Q_12_02_2016_15_40_19_174	2019-09-23 21:02:13	E:/Aggression Videos/From Chris/Newer Videos/RI47B_R9_185_I1Q_12_02_2016_15_40_19_174_0.avi	1027.570	30.0	No focal subject	1	67.025		STATE	367.382	370.757	3.375
RI47B_R9_185_I1Q_12_02_2016_15_40_19_174	2019-09-23 21:02:13	E:/Aggression Videos/From Chris/Newer Videos/RI47B_R9_185_I1Q_12_02_2016_15_40_19_174_0.avi	1027.570	30.0	No focal subject	2	90.025		STATE	390.382	421.157	30.775
RI47B_R9_185_I1Q_12_02_2016_15_40_19_174	2019-09-23 21:02:13	E:/Aggression Videos/From Chris/Newer Videos/RI47B_R9_185_I1Q_12_02_2016_15_40_19_174_0.avi	1027.570	30.0	No focal subject	1	124.492		STATE	424.849	426.099	1.250
RI47B_R9_185_I1Q_12_02_2016_15_40_19_174	2019-09-23 21:02:13	E:/Aggression Videos/From Chris/Newer Videos/RI47B_R9_185_I1Q_12_02_2016_15_40_19_174_0.avi	1027.570	30.0	No focal subject	2	135.617		STATE	435.974	455.354	19.380
RI47B_R9_185_I1Q_12_02_2016_15_40_19_174	2019-09-23 21:02:13	E:/Aggression Videos/From Chris/Newer Videos/RI47B_R9_185_I1Q_12_02_2016_15_40_19_174_0.avi	1027.570	30.0	No focal subject	1	158.368		STATE	458.725	460.804	2.079
RI47B_R9_185_I1Q_12_02_2016_15_40_19_174	2019-09-23 21:02:13	E:/Aggression Videos/From Chris/Newer Videos/RI47B_R9_185_I1Q_12_02_2016_15_40_19_174_0.avi	1027.570	30.0	No focal subject	2	175.25		STATE	475.607	482.622	7.015
RI47B_R9_185_I1Q_12_02_2016_15_40_19_174	2019-09-23 21:02:13	E:/Aggression Videos/From Chris/Newer Videos/RI47B_R9_185_I1Q_12_02_2016_15_40_19_174_0.avi	1027.570	30.0	No focal subject	8	179.771		STATE	480.128	539.578	59.450
RI47B_R9_185_I1Q_12_02_2016_15_40_19_174	2019-09-23 21:02:13	E:/Aggression Videos/From Chris/Newer Videos/RI47B_R9_185_I1Q_12_02_2016_15_40_19_174_0.avi	1027.570	30.0	No focal subject	2	184.671		STATE	485.028	509.633	24.605
RI47B_R9_185_I1Q_12_02_2016_15_40_19_174	2019-09-23 21:02:13	E:/Aggression Videos/From Chris/Newer Videos/RI47B_R9_185_I1Q_12_02_2016_15_40_19_174_0.avi	1027.570	30.0	No focal subject	6	227.778		STATE	528.135	539.307	11.172
RI47B_R9_185_I1Q_12_02_2016_15_40_19_174	2019-09-23 21:02:13	E:/Aggression Videos/From Chris/Newer Videos/RI47B_R9_185_I1Q_12_02_2016_15_40_19_174_0.avi	1027.570	30.0	No focal subject	4	243.986		STATE	544.343	547.938	3.595
RI47B_R9_185_I1Q_12_02_2016_15_40_19_174	2019-09-23 21:02:13	E:/Aggression Videos/From Chris/Newer Videos/RI47B_R9_185_I1Q_12_02_2016_15_40_19_174_0.avi	1027.570	30.0	No focal subject	6	247.581		STATE	547.938	561.295	13.357
RI47B_R9_185_I1Q_12_02_2016_15_40_19_174	2019-09-23 21:02:13	E:/Aggression Videos/From Chris/Newer Videos/RI47B_R9_185_I1Q_12_02_2016_15_40_19_174_0.avi	1027.570	30.0	No focal subject	4	261.461		STATE	561.818	565.493	3.675
RI47B_R9_185_I1Q_12_02_2016_15_40_19_174	2019-09-23 21:02:13	E:/Aggression Videos/From Chris/Newer Videos/RI47B_R9_185_I1Q_12_02_2016_15_40_19_174_0.avi	1027.570	30.0	No focal subject	6	267.462		STATE	567.819	573.793	5.974
RI47B_R9_185_I1Q_12_02_2016_15_40_19_174	2019-09-23 21:02:13	E:/Aggression Videos/From Chris/Newer Videos/RI47B_R9_185_I1Q_12_02_2016_15_40_19_174_0.avi	1027.570	30.0	No focal subject	6	277.286		STATE	577.643	588.044	10.401
RI47B_R9_185_I1Q_12_02_2016_15_40_19_174	2019-09-23 21:02:13	E:/Aggression Videos/From Chris/Newer Videos/RI47B_R9_185_I1Q_12_02_2016_15_40_19_174_0.avi	1027.570	30.0	No focal subject	4	293.686		STATE	594.043	595.543	1.500
RI47B_R9_185_I1Q_12_02_2016_15_40_19_174	2019-09-23 21:02:13	E:/Aggression Videos/From Chris/Newer Videos/RI47B_R9_185_I1Q_12_02_2016_15_40_19_174_0.avi	1027.570	30.0	No focal subject	8	299.751		STATE	600.108	659.733	59.625
RI47B_R9_185_I1Q_12_02_2016_15_40_19_174	2019-09-23 21:02:13	E:/Aggression Videos/From Chris/Newer Videos/RI47B_R9_185_I1Q_12_02_2016_15_40_19_174_0.avi	1027.570	30.0	No focal subject	6	299.936		STATE	600.293	603.343	3.050
RI47B_R9_185_I1Q_12_02_2016_15_40_19_174	2019-09-23 21:02:13	E:/Aggression Videos/From Chris/Newer Videos/RI47B_R9_185_I1Q_12_02_2016_15_40_19_174_0.avi	1027.570	30.0	No focal subject	6	314.927		STATE	615.284	618.101	2.817
RI47B_R9_185_I1Q_12_02_2016_15_40_19_174	2019-09-23 21:02:13	E:/Aggression Videos/From Chris/Newer Videos/RI47B_R9_185_I1Q_12_02_2016_15_40_19_174_0.avi	1027.570	30.0	No focal subject	4	318.519		STATE	618.876	624.325	5.449
RI47B_R9_185_I1Q_12_02_2016_15_40_19_174	2019-09-23 21:02:13	E:/Aggression Videos/From Chris/Newer Videos/RI47B_R9_185_I1Q_12_02_2016_15_40_19_174_0.avi	1027.570	30.0	No focal subject	6	326.519		STATE	626.876	632.326	5.450
RI47B_R9_185_I1Q_12_02_2016_15_40_19_174	2019-09-23 21:02:13	E:/Aggression Videos/From Chris/Newer Videos/RI47B_R9_185_I1Q_12_02_2016_15_40_19_174_0.avi	1027.570	30.0	No focal subject	6	337.844		STATE	638.201	641.551	3.350
RI47B_R9_185_I1Q_12_02_2016_15_40_19_174	2019-09-23 21:02:13	E:/Aggression Videos/From Chris/Newer Videos/RI47B_R9_185_I1Q_12_02_2016_15_40_19_174_0.avi	1027.570	30.0	No focal subject	2	361.618		STATE	661.975	671.393	9.418
RI47B_R9_185_I1Q_12_02_2016_15_40_19_174	2019-09-23 21:02:13	E:/Aggression Videos/From Chris/Newer Videos/RI47B_R9_185_I1Q_12_02_2016_15_40_19_174_0.avi	1027.570	30.0	No focal subject	6	377.126		STATE	677.483	678.767	1.284
RI47B_R9_185_I1Q_12_02_2016_15_40_19_174	2019-09-23 21:02:13	E:/Aggression Videos/From Chris/Newer Videos/RI47B_R9_185_I1Q_12_02_2016_15_40_19_174_0.avi	1027.570	30.0	No focal subject	4	378.677		STATE	679.034	683.158	4.124
RI47B_R9_185_I1Q_12_02_2016_15_40_19_174	2019-09-23 21:02:13	E:/Aggression Videos/From Chris/Newer Videos/RI47B_R9_185_I1Q_12_02_2016_15_40_19_174_0.avi	1027.570	30.0	No focal subject	2	396.501		STATE	696.858	704.359	7.501
RI47B_R9_185_I1Q_12_02_2016_15_40_19_174	2019-09-23 21:02:13	E:/Aggression Videos/From Chris/Newer Videos/RI47B_R9_185_I1Q_12_02_2016_15_40_19_174_0.avi	1027.570	30.0	No focal subject	8	419.893		STATE	720.250	779.798	59.548
RI47B_R9_185_I1Q_12_02_2016_15_40_19_174	2019-09-23 21:02:13	E:/Aggression Videos/From Chris/Newer Videos/RI47B_R9_185_I1Q_12_02_2016_15_40_19_174_0.avi	1027.570	30.0	No focal subject	1	420.043		STATE	720.400	723.276	2.876
RI47B_R9_185_I1Q_12_02_2016_15_40_19_174	2019-09-23 21:02:13	E:/Aggression Videos/From Chris/Newer Videos/RI47B_R9_185_I1Q_12_02_2016_15_40_19_174_0.avi	1027.570	30.0	No focal subject	2	472.707		STATE	773.064	775.681	2.617
RI47B_R9_185_I1Q_12_02_2016_15_40_19_174	2019-09-23 21:02:13	E:/Aggression Videos/From Chris/Newer Videos/RI47B_R9_185_I1Q_12_02_2016_15_40_19_174_0.avi	1027.570	30.0	No focal subject	2	492.716		STATE	793.073	824.802	31.729
RI47B_R9_185_I1Q_12_02_2016_15_40_19_174	2019-09-23 21:02:13	E:/Aggression Videos/From Chris/Newer Videos/RI47B_R9_185_I1Q_12_02_2016_15_40_19_174_0.avi	1027.570	30.0	No focal subject	8	540.616		STATE	840.973	900.173	59.200
RI47B_R9_185_I1Q_12_02_2016_15_40_19_174	2019-09-23 21:02:13	E:/Aggression Videos/From Chris/Newer Videos/RI47B_R9_185_I1Q_12_02_2016_15_40_19_174_0.avi	1027.570	30.0	No focal subject	2	546.617		STATE	846.974	852.773	5.799
RI47B_R9_185_I1Q_12_02_2016_15_40_19_174	2019-09-23 21:02:13	E:/Aggression Videos/From Chris/Newer Videos/RI47B_R9_185_I1Q_12_02_2016_15_40_19_174_0.avi	1027.570	30.0	No focal subject	1	558.549		STATE	858.906	867.331	8.425
RI47B_R9_185_I1Q_12_02_2016_15_40_19_174	2019-09-23 21:02:13	E:/Aggression Videos/From Chris/Newer Videos/RI47B_R9_185_I1Q_12_02_2016_15_40_19_174_0.avi	1027.570	30.0	No focal subject	6	577.578		STATE	877.935	888.394	10.459
RI47B_R9_185_I1Q_12_02_2016_15_40_19_174	2019-09-23 21:02:13	E:/Aggression Videos/From Chris/Newer Videos/RI47B_R9_185_I1Q_12_02_2016_15_40_19_174_0.avi	1027.570	30.0	No focal subject	4	588.053		STATE	888.410	892.048	3.638
RI47B_R9_185_I1Q_12_02_2016_15_40_19_174	2019-09-23 21:02:13	E:/Aggression Videos/From Chris/Newer Videos/RI47B_R9_185_I1Q_12_02_2016_15_40_19_174_0.avi	1027.570	30.0	No focal subject	6	594.591		STATE	894.948	899.898	4.950
RI47B_R9_185_I1Q_12_02_2016_15_40_19_174	2019-09-23 21:02:13	E:/Aggression Videos/From Chris/Newer Videos/RI47B_R9_185_I1Q_12_02_2016_15_40_19_174_0.avi	1027.570	30.0	No focal subject	7	601.849		STATE	902.206	902.482	0.276
RI47B_R9_185_I1Q_12_02_2016_15_40_19_174	2019-09-23 21:02:13	E:/Aggression Videos/From Chris/Newer Videos/RI47B_R9_185_I1Q_12_02_2016_15_40_19_174_0.avi	1027.570	30.0	No focal subject	3	604.716		STATE	905.073	905.963	0.890
RI47B_R9_185_I1Q_12_02_2016_15_40_19_174	2019-09-23 21:02:13	E:/Aggression Videos/From Chris/Newer Videos/RI47B_R9_185_I1Q_12_02_2016_15_40_19_174_0.avi	1027.570	30.0	No focal subject	4	608.842		STATE	909.199	915.674	6.475
RI47B_R9_185_I1Q_12_02_2016_15_40_19_174	2019-09-23 21:02:13	E:/Aggression Videos/From Chris/Newer Videos/RI47B_R9_185_I1Q_12_02_2016_15_40_19_174_0.avi	1027.570	30.0	No focal subject	7	616.367		STATE	916.724	918.007	1.283
RI47B_R9_185_I1Q_12_02_2016_15_40_19_174	2019-09-23 21:02:13	E:/Aggression Videos/From Chris/Newer Videos/RI47B_R9_185_I1Q_12_02_2016_15_40_19_174_0.avi	1027.570	30.0	No focal subject	6	619.728		STATE	920.085	922.141	2.056
RI47B_R9_185_I1Q_12_02_2016_15_40_19_174	2019-09-23 21:02:13	E:/Aggression Videos/From Chris/Newer Videos/RI47B_R9_185_I1Q_12_02_2016_15_40_19_174_0.avi	1027.570	30.0	No focal subject	4	621.784		STATE	922.141	924.451	2.310
RI47B_R9_185_I1Q_12_02_2016_15_40_19_174	2019-09-23 21:02:13	E:/Aggression Videos/From Chris/Newer Videos/RI47B_R9_185_I1Q_12_02_2016_15_40_19_174_0.avi	1027.570	30.0	No focal subject	6	624.891		STATE	925.248	932.421	7.173
RI47B_R9_185_I1Q_12_02_2016_15_40_19_174	2019-09-23 21:02:13	E:/Aggression Videos/From Chris/Newer Videos/RI47B_R9_185_I1Q_12_02_2016_15_40_19_174_0.avi	1027.570	30.0	No focal subject	7	632.064		STATE	932.421	933.990	1.569
RI47B_R9_185_I1Q_12_02_2016_15_40_19_174	2019-09-23 21:02:13	E:/Aggression Videos/From Chris/Newer Videos/RI47B_R9_185_I1Q_12_02_2016_15_40_19_174_0.avi	1027.570	30.0	No focal subject	1	638.507		STATE	938.864	946.340	7.476
RI47B_R9_185_I1Q_12_02_2016_15_40_19_174	2019-09-23 21:02:13	E:/Aggression Videos/From Chris/Newer Videos/RI47B_R9_185_I1Q_12_02_2016_15_40_19_174_0.avi	1027.570	30.0	No focal subject	6	646.456		STATE	946.813	950.925	4.112
RI47B_R9_185_I1Q_12_02_2016_15_40_19_174	2019-09-23 21:02:13	E:/Aggression Videos/From Chris/Newer Videos/RI47B_R9_185_I1Q_12_02_2016_15_40_19_174_0.avi	1027.570	30.0	No focal subject	4	650.857		STATE	951.214	954.815	3.601
RI47B_R9_185_I1Q_12_02_2016_15_40_19_174	2019-09-23 21:02:13	E:/Aggression Videos/From Chris/Newer Videos/RI47B_R9_185_I1Q_12_02_2016_15_40_19_174_0.avi	1027.570	30.0	No focal subject	1	664.961		STATE	965.318	969.614	4.296
RI47B_R9_185_I1Q_12_02_2016_15_40_19_174	2019-09-23 21:02:13	E:/Aggression Videos/From Chris/Newer Videos/RI47B_R9_185_I1Q_12_02_2016_15_40_19_174_0.avi	1027.570	30.0	No focal subject	7	681.409		STATE	981.766	982.781	1.015
RI47B_R9_185_I1Q_12_02_2016_15_40_19_174	2019-09-23 21:02:13	E:/Aggression Videos/From Chris/Newer Videos/RI47B_R9_185_I1Q_12_02_2016_15_40_19_174_0.avi	1027.570	30.0	No focal subject	1	687.859		STATE	988.216	991.414	3.198
RI47B_R9_185_I1Q_12_02_2016_15_40_19_174	2019-09-23 21:02:13	E:/Aggression Videos/From Chris/Newer Videos/RI47B_R9_185_I1Q_12_02_2016_15_40_19_174_0.avi	1027.570	30.0	No focal subject	1	702.337		STATE	1002.694	1005.015	2.321

## Sheet: 51A
Observation id	Observation date	Media file	Total length	FPS	Subject	Behavior	Behavioral category	Modifiers	Behavior type	Start (s)	Stop (s)	Duration (s)	Comment start	Comment stop
RI51A_R9_106_I1P_12_13_2016_15_40_19_174	2019-09-24 19:54:59	E:/Aggression Videos/From Chris/Newer Videos/RI51A_R9_106_I1P_12_13_2016_15_40_19_174_0.avi	1080.530	30.0	No focal subject	0	0.295		POINT	300.021	300.021	NA
RI51A_R9_106_I1P_12_13_2016_15_40_19_174	2019-09-24 19:54:59	E:/Aggression Videos/From Chris/Newer Videos/RI51A_R9_106_I1P_12_13_2016_15_40_19_174_0.avi	1080.530	30.0	No focal subject	2	31.939		STATE	331.665	363.050	31.385
RI51A_R9_106_I1P_12_13_2016_15_40_19_174	2019-09-24 19:54:59	E:/Aggression Videos/From Chris/Newer Videos/RI51A_R9_106_I1P_12_13_2016_15_40_19_174_0.avi	1080.530	30.0	No focal subject	8	60		STATE	359.726	419.318	59.592
RI51A_R9_106_I1P_12_13_2016_15_40_19_174	2019-09-24 19:54:59	E:/Aggression Videos/From Chris/Newer Videos/RI51A_R9_106_I1P_12_13_2016_15_40_19_174_0.avi	1080.530	30.0	No focal subject	2	66.675		STATE	366.401	375.276	8.875
RI51A_R9_106_I1P_12_13_2016_15_40_19_174	2019-09-24 19:54:59	E:/Aggression Videos/From Chris/Newer Videos/RI51A_R9_106_I1P_12_13_2016_15_40_19_174_0.avi	1080.530	30.0	No focal subject	2	94.674		STATE	394.400	409.050	14.650
RI51A_R9_106_I1P_12_13_2016_15_40_19_174	2019-09-24 19:54:59	E:/Aggression Videos/From Chris/Newer Videos/RI51A_R9_106_I1P_12_13_2016_15_40_19_174_0.avi	1080.530	30.0	No focal subject	2	116.249		STATE	415.975	431.775	15.800
RI51A_R9_106_I1P_12_13_2016_15_40_19_174	2019-09-24 19:54:59	E:/Aggression Videos/From Chris/Newer Videos/RI51A_R9_106_I1P_12_13_2016_15_40_19_174_0.avi	1080.530	30.0	No focal subject	1	133.592		STATE	433.318	435.592	2.274
RI51A_R9_106_I1P_12_13_2016_15_40_19_174	2019-09-24 19:54:59	E:/Aggression Videos/From Chris/Newer Videos/RI51A_R9_106_I1P_12_13_2016_15_40_19_174_0.avi	1080.530	30.0	No focal subject	2	139.041		STATE	438.767	444.143	5.376
RI51A_R9_106_I1P_12_13_2016_15_40_19_174	2019-09-24 19:54:59	E:/Aggression Videos/From Chris/Newer Videos/RI51A_R9_106_I1P_12_13_2016_15_40_19_174_0.avi	1080.530	30.0	No focal subject	2	149.621		STATE	449.347	462.097	12.750
RI51A_R9_106_I1P_12_13_2016_15_40_19_174	2019-09-24 19:54:59	E:/Aggression Videos/From Chris/Newer Videos/RI51A_R9_106_I1P_12_13_2016_15_40_19_174_0.avi	1080.530	30.0	No focal subject	8	180.183		STATE	479.909	539.318	59.409
RI51A_R9_106_I1P_12_13_2016_15_40_19_174	2019-09-24 19:54:59	E:/Aggression Videos/From Chris/Newer Videos/RI51A_R9_106_I1P_12_13_2016_15_40_19_174_0.avi	1080.530	30.0	No focal subject	2	201.407		STATE	501.133	525.934	24.801
RI51A_R9_106_I1P_12_13_2016_15_40_19_174	2019-09-24 19:54:59	E:/Aggression Videos/From Chris/Newer Videos/RI51A_R9_106_I1P_12_13_2016_15_40_19_174_0.avi	1080.530	30.0	No focal subject	6	230.954		STATE	530.680	536.681	6.001
RI51A_R9_106_I1P_12_13_2016_15_40_19_174	2019-09-24 19:54:59	E:/Aggression Videos/From Chris/Newer Videos/RI51A_R9_106_I1P_12_13_2016_15_40_19_174_0.avi	1080.530	30.0	No focal subject	1	249.991		STATE	549.717	551.768	2.051
RI51A_R9_106_I1P_12_13_2016_15_40_19_174	2019-09-24 19:54:59	E:/Aggression Videos/From Chris/Newer Videos/RI51A_R9_106_I1P_12_13_2016_15_40_19_174_0.avi	1080.530	30.0	No focal subject	8	300.208		STATE	599.934	659.193	59.259
RI51A_R9_106_I1P_12_13_2016_15_40_19_174	2019-09-24 19:54:59	E:/Aggression Videos/From Chris/Newer Videos/RI51A_R9_106_I1P_12_13_2016_15_40_19_174_0.avi	1080.530	30.0	No focal subject	1	384.783		STATE	684.509	686.063	1.554
RI51A_R9_106_I1P_12_13_2016_15_40_19_174	2019-09-24 19:54:59	E:/Aggression Videos/From Chris/Newer Videos/RI51A_R9_106_I1P_12_13_2016_15_40_19_174_0.avi	1080.530	30.0	No focal subject	8	422.165		STATE	721.891	781.559	59.668
RI51A_R9_106_I1P_12_13_2016_15_40_19_174	2019-09-24 19:54:59	E:/Aggression Videos/From Chris/Newer Videos/RI51A_R9_106_I1P_12_13_2016_15_40_19_174_0.avi	1080.530	30.0	No focal subject	1	443.724		STATE	743.450	746.706	3.256
RI51A_R9_106_I1P_12_13_2016_15_40_19_174	2019-09-24 19:54:59	E:/Aggression Videos/From Chris/Newer Videos/RI51A_R9_106_I1P_12_13_2016_15_40_19_174_0.avi	1080.530	30.0	No focal subject	1	496.466		STATE	796.192	797.492	1.300
RI51A_R9_106_I1P_12_13_2016_15_40_19_174	2019-09-24 19:54:59	E:/Aggression Videos/From Chris/Newer Videos/RI51A_R9_106_I1P_12_13_2016_15_40_19_174_0.avi	1080.530	30.0	No focal subject	2	501.366		STATE	801.092	804.534	3.442
RI51A_R9_106_I1P_12_13_2016_15_40_19_174	2019-09-24 19:54:59	E:/Aggression Videos/From Chris/Newer Videos/RI51A_R9_106_I1P_12_13_2016_15_40_19_174_0.avi	1080.530	30.0	No focal subject	6	506.083		STATE	805.809	815.583	9.774
RI51A_R9_106_I1P_12_13_2016_15_40_19_174	2019-09-24 19:54:59	E:/Aggression Videos/From Chris/Newer Videos/RI51A_R9_106_I1P_12_13_2016_15_40_19_174_0.avi	1080.530	30.0	No focal subject	7	518.365		STATE	818.091	818.867	0.776
RI51A_R9_106_I1P_12_13_2016_15_40_19_174	2019-09-24 19:54:59	E:/Aggression Videos/From Chris/Newer Videos/RI51A_R9_106_I1P_12_13_2016_15_40_19_174_0.avi	1080.530	30.0	No focal subject	1	521.041		STATE	820.767	824.342	3.575
RI51A_R9_106_I1P_12_13_2016_15_40_19_174	2019-09-24 19:54:59	E:/Aggression Videos/From Chris/Newer Videos/RI51A_R9_106_I1P_12_13_2016_15_40_19_174_0.avi	1080.530	30.0	No focal subject	1	530.891		STATE	830.617	832.417	1.800
RI51A_R9_106_I1P_12_13_2016_15_40_19_174	2019-09-24 19:54:59	E:/Aggression Videos/From Chris/Newer Videos/RI51A_R9_106_I1P_12_13_2016_15_40_19_174_0.avi	1080.530	30.0	No focal subject	8	540.433		STATE	840.159	899.550	59.391
RI51A_R9_106_I1P_12_13_2016_15_40_19_174	2019-09-24 19:54:59	E:/Aggression Videos/From Chris/Newer Videos/RI51A_R9_106_I1P_12_13_2016_15_40_19_174_0.avi	1080.530	30.0	No focal subject	1	544.682		STATE	844.408	846.184	1.776
RI51A_R9_106_I1P_12_13_2016_15_40_19_174	2019-09-24 19:54:59	E:/Aggression Videos/From Chris/Newer Videos/RI51A_R9_106_I1P_12_13_2016_15_40_19_174_0.avi	1080.530	30.0	No focal subject	1	560.682		STATE	860.408	861.683	1.275
RI51A_R9_106_I1P_12_13_2016_15_40_19_174	2019-09-24 19:54:59	E:/Aggression Videos/From Chris/Newer Videos/RI51A_R9_106_I1P_12_13_2016_15_40_19_174_0.avi	1080.530	30.0	No focal subject	1	563.707		STATE	863.433	864.483	1.050
RI51A_R9_106_I1P_12_13_2016_15_40_19_174	2019-09-24 19:54:59	E:/Aggression Videos/From Chris/Newer Videos/RI51A_R9_106_I1P_12_13_2016_15_40_19_174_0.avi	1080.530	30.0	No focal subject	1	581.524		STATE	881.250	883.755	2.505
RI51A_R9_106_I1P_12_13_2016_15_40_19_174	2019-09-24 19:54:59	E:/Aggression Videos/From Chris/Newer Videos/RI51A_R9_106_I1P_12_13_2016_15_40_19_174_0.avi	1080.530	30.0	No focal subject	6	671.27		STATE	970.996	972.526	1.530
RI51A_R9_106_I1P_12_13_2016_15_40_19_174	2019-09-24 19:54:59	E:/Aggression Videos/From Chris/Newer Videos/RI51A_R9_106_I1P_12_13_2016_15_40_19_174_0.avi	1080.530	30.0	No focal subject	6	684.395		STATE	984.121	994.896	10.775
RI51A_R9_106_I1P_12_13_2016_15_40_19_174	2019-09-24 19:54:59	E:/Aggression Videos/From Chris/Newer Videos/RI51A_R9_106_I1P_12_13_2016_15_40_19_174_0.avi	1080.530	30.0	No focal subject	1	703.549		STATE	1003.275	1014.426	11.151
RI51A_R9_106_I1P_12_13_2016_15_40_19_174	2019-09-24 19:54:59	E:/Aggression Videos/From Chris/Newer Videos/RI51A_R9_106_I1P_12_13_2016_15_40_19_174_0.avi	1080.530	30.0	No focal subject	1	716.698		STATE	1016.424	1017.996	1.572
RI51A_R9_106_I1P_12_13_2016_15_40_19_174	2019-09-24 19:54:59	E:/Aggression Videos/From Chris/Newer Videos/RI51A_R9_106_I1P_12_13_2016_15_40_19_174_0.avi	1080.530	30.0	No focal subject	1	720.948		STATE	1020.674	1025.971	5.297
RI51A_R9_106_I1P_12_13_2016_15_40_19_174	2019-09-24 19:54:59	E:/Aggression Videos/From Chris/Newer Videos/RI51A_R9_106_I1P_12_13_2016_15_40_19_174_0.avi	1080.530	30.0	No focal subject	3	735.795		STATE	1035.521	1037.395	1.874
RI51A_R9_106_I1P_12_13_2016_15_40_19_174	2019-09-24 19:54:59	E:/Aggression Videos/From Chris/Newer Videos/RI51A_R9_106_I1P_12_13_2016_15_40_19_174_0.avi	1080.530	30.0	No focal subject	6	745.018		STATE	1044.744	1064.894	20.150
RI51A_R9_106_I1P_12_13_2016_15_40_19_174	2019-09-24 19:54:59	E:/Aggression Videos/From Chris/Newer Videos/RI51A_R9_106_I1P_12_13_2016_15_40_19_174_0.avi	1080.530	30.0	No focal subject	1	774.668		STATE	1074.394	1080.345	5.951

## Sheet: 51B
Observation id	Observation date	Media file	Total length	FPS	Subject	Behavior	Behavioral category	Modifiers	Behavior type	Start (s)	Stop (s)	Duration (s)	Comment start	Comment stop
RI51B_R9_106_I1T_12_15_2016_15_40_19_174	2019-09-24 20:18:21	E:/Aggression Videos/From Chris/Newer Videos/RI51B_R9_106_I1T_12_15_2016_15_40_19_174_0.avi	1067.330	30.0	No focal subject	0	0.775		POINT	300.127	300.127	NA
RI51B_R9_106_I1T_12_15_2016_15_40_19_174	2019-09-24 20:18:21	E:/Aggression Videos/From Chris/Newer Videos/RI51B_R9_106_I1T_12_15_2016_15_40_19_174_0.avi	1067.330	30.0	No focal subject	2	19.748		STATE	319.100	328.001	8.901
RI51B_R9_106_I1T_12_15_2016_15_40_19_174	2019-09-24 20:18:21	E:/Aggression Videos/From Chris/Newer Videos/RI51B_R9_106_I1T_12_15_2016_15_40_19_174_0.avi	1067.330	30.0	No focal subject	2	31.448		STATE	330.800	337.800	7.000
RI51B_R9_106_I1T_12_15_2016_15_40_19_174	2019-09-24 20:18:21	E:/Aggression Videos/From Chris/Newer Videos/RI51B_R9_106_I1T_12_15_2016_15_40_19_174_0.avi	1067.330	30.0	No focal subject	2	42.049		STATE	341.401	345.150	3.749
RI51B_R9_106_I1T_12_15_2016_15_40_19_174	2019-09-24 20:18:21	E:/Aggression Videos/From Chris/Newer Videos/RI51B_R9_106_I1T_12_15_2016_15_40_19_174_0.avi	1067.330	30.0	No focal subject	2	53.049		STATE	352.401	356.525	4.124
RI51B_R9_106_I1T_12_15_2016_15_40_19_174	2019-09-24 20:18:21	E:/Aggression Videos/From Chris/Newer Videos/RI51B_R9_106_I1T_12_15_2016_15_40_19_174_0.avi	1067.330	30.0	No focal subject	8	60		STATE	359.352	420.283	60.931
RI51B_R9_106_I1T_12_15_2016_15_40_19_174	2019-09-24 20:18:21	E:/Aggression Videos/From Chris/Newer Videos/RI51B_R9_106_I1T_12_15_2016_15_40_19_174_0.avi	1067.330	30.0	No focal subject	2	61.349		STATE	360.701	364.651	3.950
RI51B_R9_106_I1T_12_15_2016_15_40_19_174	2019-09-24 20:18:21	E:/Aggression Videos/From Chris/Newer Videos/RI51B_R9_106_I1T_12_15_2016_15_40_19_174_0.avi	1067.330	30.0	No focal subject	2	69.53		STATE	368.882	376.254	7.372
RI51B_R9_106_I1T_12_15_2016_15_40_19_174	2019-09-24 20:18:21	E:/Aggression Videos/From Chris/Newer Videos/RI51B_R9_106_I1T_12_15_2016_15_40_19_174_0.avi	1067.330	30.0	No focal subject	6	78.749		STATE	378.101	378.876	0.775
RI51B_R9_106_I1T_12_15_2016_15_40_19_174	2019-09-24 20:18:21	E:/Aggression Videos/From Chris/Newer Videos/RI51B_R9_106_I1T_12_15_2016_15_40_19_174_0.avi	1067.330	30.0	No focal subject	6	84.278		STATE	383.630	396.376	12.746
RI51B_R9_106_I1T_12_15_2016_15_40_19_174	2019-09-24 20:18:21	E:/Aggression Videos/From Chris/Newer Videos/RI51B_R9_106_I1T_12_15_2016_15_40_19_174_0.avi	1067.330	30.0	No focal subject	6	105.124		STATE	404.476	405.776	1.300
RI51B_R9_106_I1T_12_15_2016_15_40_19_174	2019-09-24 20:18:21	E:/Aggression Videos/From Chris/Newer Videos/RI51B_R9_106_I1T_12_15_2016_15_40_19_174_0.avi	1067.330	30.0	No focal subject	6	110.774		STATE	410.126	417.852	7.726
RI51B_R9_106_I1T_12_15_2016_15_40_19_174	2019-09-24 20:18:21	E:/Aggression Videos/From Chris/Newer Videos/RI51B_R9_106_I1T_12_15_2016_15_40_19_174_0.avi	1067.330	30.0	No focal subject	2	137.182		STATE	436.534	440.708	4.174
RI51B_R9_106_I1T_12_15_2016_15_40_19_174	2019-09-24 20:18:21	E:/Aggression Videos/From Chris/Newer Videos/RI51B_R9_106_I1T_12_15_2016_15_40_19_174_0.avi	1067.330	30.0	No focal subject	6	141.623		STATE	440.975	446.950	5.975
RI51B_R9_106_I1T_12_15_2016_15_40_19_174	2019-09-24 20:18:21	E:/Aggression Videos/From Chris/Newer Videos/RI51B_R9_106_I1T_12_15_2016_15_40_19_174_0.avi	1067.330	30.0	No focal subject	6	153.749		STATE	453.101	458.026	4.925
RI51B_R9_106_I1T_12_15_2016_15_40_19_174	2019-09-24 20:18:21	E:/Aggression Videos/From Chris/Newer Videos/RI51B_R9_106_I1T_12_15_2016_15_40_19_174_0.avi	1067.330	30.0	No focal subject	2	166.299		STATE	465.651	467.500	1.849
RI51B_R9_106_I1T_12_15_2016_15_40_19_174	2019-09-24 20:18:21	E:/Aggression Videos/From Chris/Newer Videos/RI51B_R9_106_I1T_12_15_2016_15_40_19_174_0.avi	1067.330	30.0	No focal subject	6	171.724		STATE	471.076	473.343	2.267
RI51B_R9_106_I1T_12_15_2016_15_40_19_174	2019-09-24 20:18:21	E:/Aggression Videos/From Chris/Newer Videos/RI51B_R9_106_I1T_12_15_2016_15_40_19_174_0.avi	1067.330	30.0	No focal subject	8	180.149		STATE	479.501	539.792	60.291
RI51B_R9_106_I1T_12_15_2016_15_40_19_174	2019-09-24 20:18:21	E:/Aggression Videos/From Chris/Newer Videos/RI51B_R9_106_I1T_12_15_2016_15_40_19_174_0.avi	1067.330	30.0	No focal subject	2	180.191		STATE	479.543	487.093	7.550
RI51B_R9_106_I1T_12_15_2016_15_40_19_174	2019-09-24 20:18:21	E:/Aggression Videos/From Chris/Newer Videos/RI51B_R9_106_I1T_12_15_2016_15_40_19_174_0.avi	1067.330	30.0	No focal subject	1	203.389		STATE	502.741	504.028	1.287
RI51B_R9_106_I1T_12_15_2016_15_40_19_174	2019-09-24 20:18:21	E:/Aggression Videos/From Chris/Newer Videos/RI51B_R9_106_I1T_12_15_2016_15_40_19_174_0.avi	1067.330	30.0	No focal subject	6	207.872		STATE	507.224	521.891	14.667
RI51B_R9_106_I1T_12_15_2016_15_40_19_174	2019-09-24 20:18:21	E:/Aggression Videos/From Chris/Newer Videos/RI51B_R9_106_I1T_12_15_2016_15_40_19_174_0.avi	1067.330	30.0	No focal subject	3	226.072		STATE	525.424	526.666	1.242
RI51B_R9_106_I1T_12_15_2016_15_40_19_174	2019-09-24 20:18:21	E:/Aggression Videos/From Chris/Newer Videos/RI51B_R9_106_I1T_12_15_2016_15_40_19_174_0.avi	1067.330	30.0	No focal subject	4	230.063		STATE	529.415	531.465	2.050
RI51B_R9_106_I1T_12_15_2016_15_40_19_174	2019-09-24 20:18:21	E:/Aggression Videos/From Chris/Newer Videos/RI51B_R9_106_I1T_12_15_2016_15_40_19_174_0.avi	1067.330	30.0	No focal subject	1	234.139		STATE	533.491	537.841	4.350
RI51B_R9_106_I1T_12_15_2016_15_40_19_174	2019-09-24 20:18:21	E:/Aggression Videos/From Chris/Newer Videos/RI51B_R9_106_I1T_12_15_2016_15_40_19_174_0.avi	1067.330	30.0	No focal subject	1	245.549		STATE	544.901	547.301	2.400
RI51B_R9_106_I1T_12_15_2016_15_40_19_174	2019-09-24 20:18:21	E:/Aggression Videos/From Chris/Newer Videos/RI51B_R9_106_I1T_12_15_2016_15_40_19_174_0.avi	1067.330	30.0	No focal subject	6	257.111		STATE	556.463	568.391	11.928
RI51B_R9_106_I1T_12_15_2016_15_40_19_174	2019-09-24 20:18:21	E:/Aggression Videos/From Chris/Newer Videos/RI51B_R9_106_I1T_12_15_2016_15_40_19_174_0.avi	1067.330	30.0	No focal subject	1	282.745		STATE	582.097	587.541	5.444
RI51B_R9_106_I1T_12_15_2016_15_40_19_174	2019-09-24 20:18:21	E:/Aggression Videos/From Chris/Newer Videos/RI51B_R9_106_I1T_12_15_2016_15_40_19_174_0.avi	1067.330	30.0	No focal subject	8	300.332		STATE	599.684	659.759	60.075
RI51B_R9_106_I1T_12_15_2016_15_40_19_174	2019-09-24 20:18:21	E:/Aggression Videos/From Chris/Newer Videos/RI51B_R9_106_I1T_12_15_2016_15_40_19_174_0.avi	1067.330	30.0	No focal subject	1	313.081		STATE	612.433	622.458	10.025
RI51B_R9_106_I1T_12_15_2016_15_40_19_174	2019-09-24 20:18:21	E:/Aggression Videos/From Chris/Newer Videos/RI51B_R9_106_I1T_12_15_2016_15_40_19_174_0.avi	1067.330	30.0	No focal subject	2	339.399		STATE	638.751	639.276	0.525
RI51B_R9_106_I1T_12_15_2016_15_40_19_174	2019-09-24 20:18:21	E:/Aggression Videos/From Chris/Newer Videos/RI51B_R9_106_I1T_12_15_2016_15_40_19_174_0.avi	1067.330	30.0	No focal subject	1	343.502		STATE	642.854	643.876	1.022
RI51B_R9_106_I1T_12_15_2016_15_40_19_174	2019-09-24 20:18:21	E:/Aggression Videos/From Chris/Newer Videos/RI51B_R9_106_I1T_12_15_2016_15_40_19_174_0.avi	1067.330	30.0	No focal subject	6	347.924		STATE	647.276	652.726	5.450
RI51B_R9_106_I1T_12_15_2016_15_40_19_174	2019-09-24 20:18:21	E:/Aggression Videos/From Chris/Newer Videos/RI51B_R9_106_I1T_12_15_2016_15_40_19_174_0.avi	1067.330	30.0	No focal subject	1	356.049		STATE	655.401	656.451	1.050
RI51B_R9_106_I1T_12_15_2016_15_40_19_174	2019-09-24 20:18:21	E:/Aggression Videos/From Chris/Newer Videos/RI51B_R9_106_I1T_12_15_2016_15_40_19_174_0.avi	1067.330	30.0	No focal subject	6	358.674		STATE	658.026	662.451	4.425
RI51B_R9_106_I1T_12_15_2016_15_40_19_174	2019-09-24 20:18:21	E:/Aggression Videos/From Chris/Newer Videos/RI51B_R9_106_I1T_12_15_2016_15_40_19_174_0.avi	1067.330	30.0	No focal subject	6	366.818		STATE	666.170	667.191	1.021
RI51B_R9_106_I1T_12_15_2016_15_40_19_174	2019-09-24 20:18:21	E:/Aggression Videos/From Chris/Newer Videos/RI51B_R9_106_I1T_12_15_2016_15_40_19_174_0.avi	1067.330	30.0	No focal subject	6	374.9		STATE	674.252	676.417	2.165
RI51B_R9_106_I1T_12_15_2016_15_40_19_174	2019-09-24 20:18:21	E:/Aggression Videos/From Chris/Newer Videos/RI51B_R9_106_I1T_12_15_2016_15_40_19_174_0.avi	1067.330	30.0	No focal subject	6	379.139		STATE	678.491	681.117	2.626
RI51B_R9_106_I1T_12_15_2016_15_40_19_174	2019-09-24 20:18:21	E:/Aggression Videos/From Chris/Newer Videos/RI51B_R9_106_I1T_12_15_2016_15_40_19_174_0.avi	1067.330	30.0	No focal subject	1	383.569		STATE	682.921	690.146	7.225
RI51B_R9_106_I1T_12_15_2016_15_40_19_174	2019-09-24 20:18:21	E:/Aggression Videos/From Chris/Newer Videos/RI51B_R9_106_I1T_12_15_2016_15_40_19_174_0.avi	1067.330	30.0	No focal subject	1	398.89		STATE	698.242	699.620	1.378
RI51B_R9_106_I1T_12_15_2016_15_40_19_174	2019-09-24 20:18:21	E:/Aggression Videos/From Chris/Newer Videos/RI51B_R9_106_I1T_12_15_2016_15_40_19_174_0.avi	1067.330	30.0	No focal subject	8	422.598		STATE	721.950	781.797	59.847
RI51B_R9_106_I1T_12_15_2016_15_40_19_174	2019-09-24 20:18:21	E:/Aggression Videos/From Chris/Newer Videos/RI51B_R9_106_I1T_12_15_2016_15_40_19_174_0.avi	1067.330	30.0	No focal subject	2	431.348		STATE	730.700	732.001	1.301
RI51B_R9_106_I1T_12_15_2016_15_40_19_174	2019-09-24 20:18:21	E:/Aggression Videos/From Chris/Newer Videos/RI51B_R9_106_I1T_12_15_2016_15_40_19_174_0.avi	1067.330	30.0	No focal subject	2	455.379		STATE	754.731	764.910	10.179
RI51B_R9_106_I1T_12_15_2016_15_40_19_174	2019-09-24 20:18:21	E:/Aggression Videos/From Chris/Newer Videos/RI51B_R9_106_I1T_12_15_2016_15_40_19_174_0.avi	1067.330	30.0	No focal subject	1	465.574		STATE	764.926	765.740	0.814
RI51B_R9_106_I1T_12_15_2016_15_40_19_174	2019-09-24 20:18:21	E:/Aggression Videos/From Chris/Newer Videos/RI51B_R9_106_I1T_12_15_2016_15_40_19_174_0.avi	1067.330	30.0	No focal subject	2	467.43		STATE	766.782	807.006	40.224
RI51B_R9_106_I1T_12_15_2016_15_40_19_174	2019-09-24 20:18:21	E:/Aggression Videos/From Chris/Newer Videos/RI51B_R9_106_I1T_12_15_2016_15_40_19_174_0.avi	1067.330	30.0	No focal subject	1	512.129		STATE	811.481	812.812	1.331
RI51B_R9_106_I1T_12_15_2016_15_40_19_174	2019-09-24 20:18:21	E:/Aggression Videos/From Chris/Newer Videos/RI51B_R9_106_I1T_12_15_2016_15_40_19_174_0.avi	1067.330	30.0	No focal subject	6	517.629		STATE	816.981	820.105	3.124
RI51B_R9_106_I1T_12_15_2016_15_40_19_174	2019-09-24 20:18:21	E:/Aggression Videos/From Chris/Newer Videos/RI51B_R9_106_I1T_12_15_2016_15_40_19_174_0.avi	1067.330	30.0	No focal subject	1	524.428		STATE	823.780	824.805	1.025
RI51B_R9_106_I1T_12_15_2016_15_40_19_174	2019-09-24 20:18:21	E:/Aggression Videos/From Chris/Newer Videos/RI51B_R9_106_I1T_12_15_2016_15_40_19_174_0.avi	1067.330	30.0	No focal subject	8	540.672		STATE	840.024	899.513	59.489
RI51B_R9_106_I1T_12_15_2016_15_40_19_174	2019-09-24 20:18:21	E:/Aggression Videos/From Chris/Newer Videos/RI51B_R9_106_I1T_12_15_2016_15_40_19_174_0.avi	1067.330	30.0	No focal subject	6	547.15		STATE	846.502	849.947	3.445
RI51B_R9_106_I1T_12_15_2016_15_40_19_174	2019-09-24 20:18:21	E:/Aggression Videos/From Chris/Newer Videos/RI51B_R9_106_I1T_12_15_2016_15_40_19_174_0.avi	1067.330	30.0	No focal subject	1	563.285		STATE	862.637	864.465	1.828
RI51B_R9_106_I1T_12_15_2016_15_40_19_174	2019-09-24 20:18:21	E:/Aggression Videos/From Chris/Newer Videos/RI51B_R9_106_I1T_12_15_2016_15_40_19_174_0.avi	1067.330	30.0	No focal subject	6	572.444		STATE	871.796	876.475	4.679
RI51B_R9_106_I1T_12_15_2016_15_40_19_174	2019-09-24 20:18:21	E:/Aggression Videos/From Chris/Newer Videos/RI51B_R9_106_I1T_12_15_2016_15_40_19_174_0.avi	1067.330	30.0	No focal subject	6	579.243		STATE	878.595	883.775	5.180
RI51B_R9_106_I1T_12_15_2016_15_40_19_174	2019-09-24 20:18:21	E:/Aggression Videos/From Chris/Newer Videos/RI51B_R9_106_I1T_12_15_2016_15_40_19_174_0.avi	1067.330	30.0	No focal subject	1	588.848		STATE	888.200	893.545	5.345
RI51B_R9_106_I1T_12_15_2016_15_40_19_174	2019-09-24 20:18:21	E:/Aggression Videos/From Chris/Newer Videos/RI51B_R9_106_I1T_12_15_2016_15_40_19_174_0.avi	1067.330	30.0	No focal subject	7	602.785		STATE	902.137	902.413	0.276
RI51B_R9_106_I1T_12_15_2016_15_40_19_174	2019-09-24 20:18:21	E:/Aggression Videos/From Chris/Newer Videos/RI51B_R9_106_I1T_12_15_2016_15_40_19_174_0.avi	1067.330	30.0	No focal subject	6	624.814		STATE	924.166	932.063	7.897
RI51B_R9_106_I1T_12_15_2016_15_40_19_174	2019-09-24 20:18:21	E:/Aggression Videos/From Chris/Newer Videos/RI51B_R9_106_I1T_12_15_2016_15_40_19_174_0.avi	1067.330	30.0	No focal subject	1	643.719		STATE	943.071	958.095	15.024
RI51B_R9_106_I1T_12_15_2016_15_40_19_174	2019-09-24 20:18:21	E:/Aggression Videos/From Chris/Newer Videos/RI51B_R9_106_I1T_12_15_2016_15_40_19_174_0.avi	1067.330	30.0	No focal subject	1	664.643		STATE	963.995	967.120	3.125
RI51B_R9_106_I1T_12_15_2016_15_40_19_174	2019-09-24 20:18:21	E:/Aggression Videos/From Chris/Newer Videos/RI51B_R9_106_I1T_12_15_2016_15_40_19_174_0.avi	1067.330	30.0	No focal subject	1	685.444		STATE	984.796	986.870	2.074
RI51B_R9_106_I1T_12_15_2016_15_40_19_174	2019-09-24 20:18:21	E:/Aggression Videos/From Chris/Newer Videos/RI51B_R9_106_I1T_12_15_2016_15_40_19_174_0.avi	1067.330	30.0	No focal subject	1	702.919		STATE	1002.271	1010.796	8.525
RI51B_R9_106_I1T_12_15_2016_15_40_19_174	2019-09-24 20:18:21	E:/Aggression Videos/From Chris/Newer Videos/RI51B_R9_106_I1T_12_15_2016_15_40_19_174_0.avi	1067.330	30.0	No focal subject	1	744.136		STATE	1043.488	1045.678	2.190

## Sheet: 51C
Observation id	Observation date	Media file	Total length	FPS	Subject	Behavior	Behavioral category	Modifiers	Behavior type	Start (s)	Stop (s)	Duration (s)	Comment start	Comment stop
RI51C_R9_106_I1U_12_16_2016_15_40_19_174	2019-09-24 20:43:45	E:/Aggression Videos/From Chris/Newer Videos/RI51C_R9_106_I1U_12_16_2016_15_40_19_174_0.avi	1081.130	30.0	No focal subject	0	0.588		POINT	300.564	300.564	NA
RI51C_R9_106_I1U_12_16_2016_15_40_19_174	2019-09-24 20:43:45	E:/Aggression Videos/From Chris/Newer Videos/RI51C_R9_106_I1U_12_16_2016_15_40_19_174_0.avi	1081.130	30.0	No focal subject	2	10.459		STATE	310.435	317.335	6.900
RI51C_R9_106_I1U_12_16_2016_15_40_19_174	2019-09-24 20:43:45	E:/Aggression Videos/From Chris/Newer Videos/RI51C_R9_106_I1U_12_16_2016_15_40_19_174_0.avi	1081.130	30.0	No focal subject	2	21.513		STATE	321.489	324.414	2.925
RI51C_R9_106_I1U_12_16_2016_15_40_19_174	2019-09-24 20:43:45	E:/Aggression Videos/From Chris/Newer Videos/RI51C_R9_106_I1U_12_16_2016_15_40_19_174_0.avi	1081.130	30.0	No focal subject	2	34.884		STATE	334.860	339.364	4.504
RI51C_R9_106_I1U_12_16_2016_15_40_19_174	2019-09-24 20:43:45	E:/Aggression Videos/From Chris/Newer Videos/RI51C_R9_106_I1U_12_16_2016_15_40_19_174_0.avi	1081.130	30.0	No focal subject	2	49.584		STATE	349.560	351.960	2.400
RI51C_R9_106_I1U_12_16_2016_15_40_19_174	2019-09-24 20:43:45	E:/Aggression Videos/From Chris/Newer Videos/RI51C_R9_106_I1U_12_16_2016_15_40_19_174_0.avi	1081.130	30.0	No focal subject	2	58.95		STATE	358.926	365.428	6.502
RI51C_R9_106_I1U_12_16_2016_15_40_19_174	2019-09-24 20:43:45	E:/Aggression Videos/From Chris/Newer Videos/RI51C_R9_106_I1U_12_16_2016_15_40_19_174_0.avi	1081.130	30.0	No focal subject	8	60		STATE	359.976	419.284	59.308
RI51C_R9_106_I1U_12_16_2016_15_40_19_174	2019-09-24 20:43:45	E:/Aggression Videos/From Chris/Newer Videos/RI51C_R9_106_I1U_12_16_2016_15_40_19_174_0.avi	1081.130	30.0	No focal subject	2	74.475		STATE	374.451	380.076	5.625
RI51C_R9_106_I1U_12_16_2016_15_40_19_174	2019-09-24 20:43:45	E:/Aggression Videos/From Chris/Newer Videos/RI51C_R9_106_I1U_12_16_2016_15_40_19_174_0.avi	1081.130	30.0	No focal subject	1	85.524		STATE	385.500	386.551	1.051
RI51C_R9_106_I1U_12_16_2016_15_40_19_174	2019-09-24 20:43:45	E:/Aggression Videos/From Chris/Newer Videos/RI51C_R9_106_I1U_12_16_2016_15_40_19_174_0.avi	1081.130	30.0	No focal subject	2	96.574		STATE	396.550	400.700	4.150
RI51C_R9_106_I1U_12_16_2016_15_40_19_174	2019-09-24 20:43:45	E:/Aggression Videos/From Chris/Newer Videos/RI51C_R9_106_I1U_12_16_2016_15_40_19_174_0.avi	1081.130	30.0	No focal subject	1	172.8		STATE	472.776	473.533	0.757
RI51C_R9_106_I1U_12_16_2016_15_40_19_174	2019-09-24 20:43:45	E:/Aggression Videos/From Chris/Newer Videos/RI51C_R9_106_I1U_12_16_2016_15_40_19_174_0.avi	1081.130	30.0	No focal subject	8	180.141		STATE	480.117	539.551	59.434
RI51C_R9_106_I1U_12_16_2016_15_40_19_174	2019-09-24 20:43:45	E:/Aggression Videos/From Chris/Newer Videos/RI51C_R9_106_I1U_12_16_2016_15_40_19_174_0.avi	1081.130	30.0	No focal subject	1	263.177		STATE	563.153	563.702	0.549
RI51C_R9_106_I1U_12_16_2016_15_40_19_174	2019-09-24 20:43:45	E:/Aggression Videos/From Chris/Newer Videos/RI51C_R9_106_I1U_12_16_2016_15_40_19_174_0.avi	1081.130	30.0	No focal subject	6	268.7		STATE	568.676	573.344	4.668
RI51C_R9_106_I1U_12_16_2016_15_40_19_174	2019-09-24 20:43:45	E:/Aggression Videos/From Chris/Newer Videos/RI51C_R9_106_I1U_12_16_2016_15_40_19_174_0.avi	1081.130	30.0	No focal subject	6	287.518		STATE	587.494	590.344	2.850
RI51C_R9_106_I1U_12_16_2016_15_40_19_174	2019-09-24 20:43:45	E:/Aggression Videos/From Chris/Newer Videos/RI51C_R9_106_I1U_12_16_2016_15_40_19_174_0.avi	1081.130	30.0	No focal subject	6	292.918		STATE	592.894	596.720	3.826
RI51C_R9_106_I1U_12_16_2016_15_40_19_174	2019-09-24 20:43:45	E:/Aggression Videos/From Chris/Newer Videos/RI51C_R9_106_I1U_12_16_2016_15_40_19_174_0.avi	1081.130	30.0	No focal subject	8	300.267		STATE	600.243	659.757	59.514
RI51C_R9_106_I1U_12_16_2016_15_40_19_174	2019-09-24 20:43:45	E:/Aggression Videos/From Chris/Newer Videos/RI51C_R9_106_I1U_12_16_2016_15_40_19_174_0.avi	1081.130	30.0	No focal subject	5	338.122		STATE	638.098	639.919	1.821
RI51C_R9_106_I1U_12_16_2016_15_40_19_174	2019-09-24 20:43:45	E:/Aggression Videos/From Chris/Newer Videos/RI51C_R9_106_I1U_12_16_2016_15_40_19_174_0.avi	1081.130	30.0	No focal subject	6	339.993		STATE	639.969	642.083	2.114
RI51C_R9_106_I1U_12_16_2016_15_40_19_174	2019-09-24 20:43:45	E:/Aggression Videos/From Chris/Newer Videos/RI51C_R9_106_I1U_12_16_2016_15_40_19_174_0.avi	1081.130	30.0	No focal subject	3	413.066		STATE	713.042	714.067	1.025
RI51C_R9_106_I1U_12_16_2016_15_40_19_174	2019-09-24 20:43:45	E:/Aggression Videos/From Chris/Newer Videos/RI51C_R9_106_I1U_12_16_2016_15_40_19_174_0.avi	1081.130	30.0	No focal subject	1	417.107		STATE	717.083	718.108	1.025
RI51C_R9_106_I1U_12_16_2016_15_40_19_174	2019-09-24 20:43:45	E:/Aggression Videos/From Chris/Newer Videos/RI51C_R9_106_I1U_12_16_2016_15_40_19_174_0.avi	1081.130	30.0	No focal subject	8	420.249		STATE	720.225	779.601	59.376
RI51C_R9_106_I1U_12_16_2016_15_40_19_174	2019-09-24 20:43:45	E:/Aggression Videos/From Chris/Newer Videos/RI51C_R9_106_I1U_12_16_2016_15_40_19_174_0.avi	1081.130	30.0	No focal subject	6	420.309		STATE	720.285	721.333	1.048
RI51C_R9_106_I1U_12_16_2016_15_40_19_174	2019-09-24 20:43:45	E:/Aggression Videos/From Chris/Newer Videos/RI51C_R9_106_I1U_12_16_2016_15_40_19_174_0.avi	1081.130	30.0	No focal subject	7	442.332		STATE	742.308	743.601	1.293
RI51C_R9_106_I1U_12_16_2016_15_40_19_174	2019-09-24 20:43:45	E:/Aggression Videos/From Chris/Newer Videos/RI51C_R9_106_I1U_12_16_2016_15_40_19_174_0.avi	1081.130	30.0	No focal subject	1	445.358		STATE	745.334	746.084	0.750
RI51C_R9_106_I1U_12_16_2016_15_40_19_174	2019-09-24 20:43:45	E:/Aggression Videos/From Chris/Newer Videos/RI51C_R9_106_I1U_12_16_2016_15_40_19_174_0.avi	1081.130	30.0	No focal subject	6	483.529		STATE	783.505	785.776	2.271
RI51C_R9_106_I1U_12_16_2016_15_40_19_174	2019-09-24 20:43:45	E:/Aggression Videos/From Chris/Newer Videos/RI51C_R9_106_I1U_12_16_2016_15_40_19_174_0.avi	1081.130	30.0	No focal subject	1	486.817		STATE	786.793	787.043	0.250
RI51C_R9_106_I1U_12_16_2016_15_40_19_174	2019-09-24 20:43:45	E:/Aggression Videos/From Chris/Newer Videos/RI51C_R9_106_I1U_12_16_2016_15_40_19_174_0.avi	1081.130	30.0	No focal subject	1	488.057		STATE	788.033	788.809	0.776
RI51C_R9_106_I1U_12_16_2016_15_40_19_174	2019-09-24 20:43:45	E:/Aggression Videos/From Chris/Newer Videos/RI51C_R9_106_I1U_12_16_2016_15_40_19_174_0.avi	1081.130	30.0	No focal subject	1	504.357		STATE	804.333	805.359	1.026
RI51C_R9_106_I1U_12_16_2016_15_40_19_174	2019-09-24 20:43:45	E:/Aggression Videos/From Chris/Newer Videos/RI51C_R9_106_I1U_12_16_2016_15_40_19_174_0.avi	1081.130	30.0	No focal subject	7	538.983		STATE	838.959	840.086	1.127
RI51C_R9_106_I1U_12_16_2016_15_40_19_174	2019-09-24 20:43:45	E:/Aggression Videos/From Chris/Newer Videos/RI51C_R9_106_I1U_12_16_2016_15_40_19_174_0.avi	1081.130	30.0	No focal subject	8	540.032		STATE	840.008	899.476	59.468
RI51C_R9_106_I1U_12_16_2016_15_40_19_174	2019-09-24 20:43:45	E:/Aggression Videos/From Chris/Newer Videos/RI51C_R9_106_I1U_12_16_2016_15_40_19_174_0.avi	1081.130	30.0	No focal subject	7	548.933		STATE	848.909	849.176	0.267
RI51C_R9_106_I1U_12_16_2016_15_40_19_174	2019-09-24 20:43:45	E:/Aggression Videos/From Chris/Newer Videos/RI51C_R9_106_I1U_12_16_2016_15_40_19_174_0.avi	1081.130	30.0	No focal subject	6	554.874		STATE	854.850	859.025	4.175
RI51C_R9_106_I1U_12_16_2016_15_40_19_174	2019-09-24 20:43:45	E:/Aggression Videos/From Chris/Newer Videos/RI51C_R9_106_I1U_12_16_2016_15_40_19_174_0.avi	1081.130	30.0	No focal subject	1	609.424		STATE	909.400	914.575	5.175
RI51C_R9_106_I1U_12_16_2016_15_40_19_174	2019-09-24 20:43:45	E:/Aggression Videos/From Chris/Newer Videos/RI51C_R9_106_I1U_12_16_2016_15_40_19_174_0.avi	1081.130	30.0	No focal subject	1	617.483		STATE	917.459	929.408	11.949
RI51C_R9_106_I1U_12_16_2016_15_40_19_174	2019-09-24 20:43:45	E:/Aggression Videos/From Chris/Newer Videos/RI51C_R9_106_I1U_12_16_2016_15_40_19_174_0.avi	1081.130	30.0	No focal subject	3	637.549		STATE	937.525	938.801	1.276
RI51C_R9_106_I1U_12_16_2016_15_40_19_174	2019-09-24 20:43:45	E:/Aggression Videos/From Chris/Newer Videos/RI51C_R9_106_I1U_12_16_2016_15_40_19_174_0.avi	1081.130	30.0	No focal subject	6	662.779		STATE	962.755	963.284	0.529
RI51C_R9_106_I1U_12_16_2016_15_40_19_174	2019-09-24 20:43:45	E:/Aggression Videos/From Chris/Newer Videos/RI51C_R9_106_I1U_12_16_2016_15_40_19_174_0.avi	1081.130	30.0	No focal subject	7	674.69		STATE	974.666	975.417	0.751
RI51C_R9_106_I1U_12_16_2016_15_40_19_174	2019-09-24 20:43:45	E:/Aggression Videos/From Chris/Newer Videos/RI51C_R9_106_I1U_12_16_2016_15_40_19_174_0.avi	1081.130	30.0	No focal subject	3	676.75		STATE	976.726	979.016	2.290
RI51C_R9_106_I1U_12_16_2016_15_40_19_174	2019-09-24 20:43:45	E:/Aggression Videos/From Chris/Newer Videos/RI51C_R9_106_I1U_12_16_2016_15_40_19_174_0.avi	1081.130	30.0	No focal subject	6	696		STATE	995.976	1002.776	6.800
RI51C_R9_106_I1U_12_16_2016_15_40_19_174	2019-09-24 20:43:45	E:/Aggression Videos/From Chris/Newer Videos/RI51C_R9_106_I1U_12_16_2016_15_40_19_174_0.avi	1081.130	30.0	No focal subject	7	710.688		STATE	1010.664	1011.800	1.136
RI51C_R9_106_I1U_12_16_2016_15_40_19_174	2019-09-24 20:43:45	E:/Aggression Videos/From Chris/Newer Videos/RI51C_R9_106_I1U_12_16_2016_15_40_19_174_0.avi	1081.130	30.0	No focal subject	1	712.1		STATE	1012.076	1012.826	0.750
RI51C_R9_106_I1U_12_16_2016_15_40_19_174	2019-09-24 20:43:45	E:/Aggression Videos/From Chris/Newer Videos/RI51C_R9_106_I1U_12_16_2016_15_40_19_174_0.avi	1081.130	30.0	No focal subject	1	720.376		STATE	1020.352	1021.376	1.024
RI51C_R9_106_I1U_12_16_2016_15_40_19_174	2019-09-24 20:43:45	E:/Aggression Videos/From Chris/Newer Videos/RI51C_R9_106_I1U_12_16_2016_15_40_19_174_0.avi	1081.130	30.0	No focal subject	6	735.791		STATE	1035.767	1036.908	1.141
RI51C_R9_106_I1U_12_16_2016_15_40_19_174	2019-09-24 20:43:45	E:/Aggression Videos/From Chris/Newer Videos/RI51C_R9_106_I1U_12_16_2016_15_40_19_174_0.avi	1081.130	30.0	No focal subject	4	736.932		STATE	1036.908	1038.475	1.567
RI51C_R9_106_I1U_12_16_2016_15_40_19_174	2019-09-24 20:43:45	E:/Aggression Videos/From Chris/Newer Videos/RI51C_R9_106_I1U_12_16_2016_15_40_19_174_0.avi	1081.130	30.0	No focal subject	6	769.916		STATE	1069.892	1074.271	4.379
RI51C_R9_106_I1U_12_16_2016_15_40_19_174	2019-09-24 20:43:45	E:/Aggression Videos/From Chris/Newer Videos/RI51C_R9_106_I1U_12_16_2016_15_40_19_174_0.avi	1081.130	30.0	No focal subject	4	774.295		STATE	1074.271	1075.320	1.049

## Sheet: 51D
Observation id	Observation date	Media file	Total length	FPS	Subject	Behavior	Behavioral category	Modifiers	Behavior type	Start (s)	Stop (s)	Duration (s)	Comment start	Comment stop
RI51D_R9_106_I2U_12_19_2016_15_40_19_174	2019-09-24 21:07:38	E:/Aggression Videos/From Chris/Newer Videos/RI51D_R9_106_I2U_12_19_2016_15_40_19_174_0.avi	920.900	30.0	No focal subject	0	0.417		POINT	300.500	300.500	NA
RI51D_R9_106_I2U_12_19_2016_15_40_19_174	2019-09-24 21:07:38	E:/Aggression Videos/From Chris/Newer Videos/RI51D_R9_106_I2U_12_19_2016_15_40_19_174_0.avi	920.900	30.0	No focal subject	2	13.992		STATE	314.075	321.251	7.176
RI51D_R9_106_I2U_12_19_2016_15_40_19_174	2019-09-24 21:07:38	E:/Aggression Videos/From Chris/Newer Videos/RI51D_R9_106_I2U_12_19_2016_15_40_19_174_0.avi	920.900	30.0	No focal subject	2	30.018		STATE	330.101	340.700	10.599
RI51D_R9_106_I2U_12_19_2016_15_40_19_174	2019-09-24 21:07:38	E:/Aggression Videos/From Chris/Newer Videos/RI51D_R9_106_I2U_12_19_2016_15_40_19_174_0.avi	920.900	30.0	No focal subject	2	43.493		STATE	343.576	349.326	5.750
RI51D_R9_106_I2U_12_19_2016_15_40_19_174	2019-09-24 21:07:38	E:/Aggression Videos/From Chris/Newer Videos/RI51D_R9_106_I2U_12_19_2016_15_40_19_174_0.avi	920.900	30.0	No focal subject	8	60		STATE	360.083	419.300	59.217
RI51D_R9_106_I2U_12_19_2016_15_40_19_174	2019-09-24 21:07:38	E:/Aggression Videos/From Chris/Newer Videos/RI51D_R9_106_I2U_12_19_2016_15_40_19_174_0.avi	920.900	30.0	No focal subject	7	61.838		STATE	361.921	362.550	0.629
RI51D_R9_106_I2U_12_19_2016_15_40_19_174	2019-09-24 21:07:38	E:/Aggression Videos/From Chris/Newer Videos/RI51D_R9_106_I2U_12_19_2016_15_40_19_174_0.avi	920.900	30.0	No focal subject	6	77.543		STATE	377.626	388.476	10.850
RI51D_R9_106_I2U_12_19_2016_15_40_19_174	2019-09-24 21:07:38	E:/Aggression Videos/From Chris/Newer Videos/RI51D_R9_106_I2U_12_19_2016_15_40_19_174_0.avi	920.900	30.0	No focal subject	2	108.017		STATE	408.100	414.350	6.250
RI51D_R9_106_I2U_12_19_2016_15_40_19_174	2019-09-24 21:07:38	E:/Aggression Videos/From Chris/Newer Videos/RI51D_R9_106_I2U_12_19_2016_15_40_19_174_0.avi	920.900	30.0	No focal subject	1	115.985		STATE	416.068	417.618	1.550
RI51D_R9_106_I2U_12_19_2016_15_40_19_174	2019-09-24 21:07:38	E:/Aggression Videos/From Chris/Newer Videos/RI51D_R9_106_I2U_12_19_2016_15_40_19_174_0.avi	920.900	30.0	No focal subject	1	122.485		STATE	422.568	422.702	0.134
RI51D_R9_106_I2U_12_19_2016_15_40_19_174	2019-09-24 21:07:38	E:/Aggression Videos/From Chris/Newer Videos/RI51D_R9_106_I2U_12_19_2016_15_40_19_174_0.avi	920.900	30.0	No focal subject	1	156.313		STATE	456.396	464.268	7.872
RI51D_R9_106_I2U_12_19_2016_15_40_19_174	2019-09-24 21:07:38	E:/Aggression Videos/From Chris/Newer Videos/RI51D_R9_106_I2U_12_19_2016_15_40_19_174_0.avi	920.900	30.0	No focal subject	2	165.985		STATE	466.068	467.118	1.050
RI51D_R9_106_I2U_12_19_2016_15_40_19_174	2019-09-24 21:07:38	E:/Aggression Videos/From Chris/Newer Videos/RI51D_R9_106_I2U_12_19_2016_15_40_19_174_0.avi	920.900	30.0	No focal subject	6	172.418		STATE	472.501	488.718	16.217
RI51D_R9_106_I2U_12_19_2016_15_40_19_174	2019-09-24 21:07:38	E:/Aggression Videos/From Chris/Newer Videos/RI51D_R9_106_I2U_12_19_2016_15_40_19_174_0.avi	920.900	30.0	No focal subject	8	179.984		STATE	480.067	539.534	59.467
RI51D_R9_106_I2U_12_19_2016_15_40_19_174	2019-09-24 21:07:38	E:/Aggression Videos/From Chris/Newer Videos/RI51D_R9_106_I2U_12_19_2016_15_40_19_174_0.avi	920.900	30.0	No focal subject	6	206.114		STATE	506.197	510.196	3.999
RI51D_R9_106_I2U_12_19_2016_15_40_19_174	2019-09-24 21:07:38	E:/Aggression Videos/From Chris/Newer Videos/RI51D_R9_106_I2U_12_19_2016_15_40_19_174_0.avi	920.900	30.0	No focal subject	6	217.902		STATE	517.985	520.858	2.873
RI51D_R9_106_I2U_12_19_2016_15_40_19_174	2019-09-24 21:07:38	E:/Aggression Videos/From Chris/Newer Videos/RI51D_R9_106_I2U_12_19_2016_15_40_19_174_0.avi	920.900	30.0	No focal subject	1	227.651		STATE	527.734	529.733	1.999
RI51D_R9_106_I2U_12_19_2016_15_40_19_174	2019-09-24 21:07:38	E:/Aggression Videos/From Chris/Newer Videos/RI51D_R9_106_I2U_12_19_2016_15_40_19_174_0.avi	920.900	30.0	No focal subject	1	233.01		STATE	533.093	533.868	0.775
RI51D_R9_106_I2U_12_19_2016_15_40_19_174	2019-09-24 21:07:38	E:/Aggression Videos/From Chris/Newer Videos/RI51D_R9_106_I2U_12_19_2016_15_40_19_174_0.avi	920.900	30.0	No focal subject	1	236.409		STATE	536.492	539.644	3.152
RI51D_R9_106_I2U_12_19_2016_15_40_19_174	2019-09-24 21:07:38	E:/Aggression Videos/From Chris/Newer Videos/RI51D_R9_106_I2U_12_19_2016_15_40_19_174_0.avi	920.900	30.0	No focal subject	6	248.528		STATE	548.611	552.011	3.400
RI51D_R9_106_I2U_12_19_2016_15_40_19_174	2019-09-24 21:07:38	E:/Aggression Videos/From Chris/Newer Videos/RI51D_R9_106_I2U_12_19_2016_15_40_19_174_0.avi	920.900	30.0	No focal subject	4	251.928		STATE	552.011	553.836	1.825
RI51D_R9_106_I2U_12_19_2016_15_40_19_174	2019-09-24 21:07:38	E:/Aggression Videos/From Chris/Newer Videos/RI51D_R9_106_I2U_12_19_2016_15_40_19_174_0.avi	920.900	30.0	No focal subject	6	255.077		STATE	555.160	556.986	1.826
RI51D_R9_106_I2U_12_19_2016_15_40_19_174	2019-09-24 21:07:38	E:/Aggression Videos/From Chris/Newer Videos/RI51D_R9_106_I2U_12_19_2016_15_40_19_174_0.avi	920.900	30.0	No focal subject	1	270.887		STATE	570.970	572.301	1.331
RI51D_R9_106_I2U_12_19_2016_15_40_19_174	2019-09-24 21:07:38	E:/Aggression Videos/From Chris/Newer Videos/RI51D_R9_106_I2U_12_19_2016_15_40_19_174_0.avi	920.900	30.0	No focal subject	6	282.578		STATE	582.661	585.986	3.325
RI51D_R9_106_I2U_12_19_2016_15_40_19_174	2019-09-24 21:07:38	E:/Aggression Videos/From Chris/Newer Videos/RI51D_R9_106_I2U_12_19_2016_15_40_19_174_0.avi	920.900	30.0	No focal subject	6	289.694		STATE	589.777	592.159	2.382
RI51D_R9_106_I2U_12_19_2016_15_40_19_174	2019-09-24 21:07:38	E:/Aggression Videos/From Chris/Newer Videos/RI51D_R9_106_I2U_12_19_2016_15_40_19_174_0.avi	920.900	30.0	No focal subject	4	296.673		STATE	596.756	599.272	2.516
RI51D_R9_106_I2U_12_19_2016_15_40_19_174	2019-09-24 21:07:38	E:/Aggression Videos/From Chris/Newer Videos/RI51D_R9_106_I2U_12_19_2016_15_40_19_174_0.avi	920.900	30.0	No focal subject	8	299.869		STATE	599.952	660.159	60.207
RI51D_R9_106_I2U_12_19_2016_15_40_19_174	2019-09-24 21:07:38	E:/Aggression Videos/From Chris/Newer Videos/RI51D_R9_106_I2U_12_19_2016_15_40_19_174_0.avi	920.900	30.0	No focal subject	1	311.943		STATE	612.026	614.377	2.351
RI51D_R9_106_I2U_12_19_2016_15_40_19_174	2019-09-24 21:07:38	E:/Aggression Videos/From Chris/Newer Videos/RI51D_R9_106_I2U_12_19_2016_15_40_19_174_0.avi	920.900	30.0	No focal subject	1	319.97		STATE	620.053	621.401	1.348
RI51D_R9_106_I2U_12_19_2016_15_40_19_174	2019-09-24 21:07:38	E:/Aggression Videos/From Chris/Newer Videos/RI51D_R9_106_I2U_12_19_2016_15_40_19_174_0.avi	920.900	30.0	No focal subject	1	323.51		STATE	623.593	625.668	2.075
RI51D_R9_106_I2U_12_19_2016_15_40_19_174	2019-09-24 21:07:38	E:/Aggression Videos/From Chris/Newer Videos/RI51D_R9_106_I2U_12_19_2016_15_40_19_174_0.avi	920.900	30.0	No focal subject	1	340.159		STATE	640.242	642.092	1.850
RI51D_R9_106_I2U_12_19_2016_15_40_19_174	2019-09-24 21:07:38	E:/Aggression Videos/From Chris/Newer Videos/RI51D_R9_106_I2U_12_19_2016_15_40_19_174_0.avi	920.900	30.0	No focal subject	1	344.408		STATE	644.491	652.817	8.326
RI51D_R9_106_I2U_12_19_2016_15_40_19_174	2019-09-24 21:07:38	E:/Aggression Videos/From Chris/Newer Videos/RI51D_R9_106_I2U_12_19_2016_15_40_19_174_0.avi	920.900	30.0	No focal subject	1	356.21		STATE	656.293	660.393	4.100
RI51D_R9_106_I2U_12_19_2016_15_40_19_174	2019-09-24 21:07:38	E:/Aggression Videos/From Chris/Newer Videos/RI51D_R9_106_I2U_12_19_2016_15_40_19_174_0.avi	920.900	30.0	No focal subject	1	362.059		STATE	662.142	663.042	0.900
RI51D_R9_106_I2U_12_19_2016_15_40_19_174	2019-09-24 21:07:38	E:/Aggression Videos/From Chris/Newer Videos/RI51D_R9_106_I2U_12_19_2016_15_40_19_174_0.avi	920.900	30.0	No focal subject	1	372.377		STATE	672.460	682.460	10.000
RI51D_R9_106_I2U_12_19_2016_15_40_19_174	2019-09-24 21:07:38	E:/Aggression Videos/From Chris/Newer Videos/RI51D_R9_106_I2U_12_19_2016_15_40_19_174_0.avi	920.900	30.0	No focal subject	6	415.472		STATE	715.555	720.184	4.629
RI51D_R9_106_I2U_12_19_2016_15_40_19_174	2019-09-24 21:07:38	E:/Aggression Videos/From Chris/Newer Videos/RI51D_R9_106_I2U_12_19_2016_15_40_19_174_0.avi	920.900	30.0	No focal subject	8	420.319		STATE	720.402	779.992	59.590
RI51D_R9_106_I2U_12_19_2016_15_40_19_174	2019-09-24 21:07:38	E:/Aggression Videos/From Chris/Newer Videos/RI51D_R9_106_I2U_12_19_2016_15_40_19_174_0.avi	920.900	30.0	No focal subject	6	422.427		STATE	722.510	730.009	7.499
RI51D_R9_106_I2U_12_19_2016_15_40_19_174	2019-09-24 21:07:38	E:/Aggression Videos/From Chris/Newer Videos/RI51D_R9_106_I2U_12_19_2016_15_40_19_174_0.avi	920.900	30.0	No focal subject	1	430.944		STATE	731.027	732.077	1.050
RI51D_R9_106_I2U_12_19_2016_15_40_19_174	2019-09-24 21:07:38	E:/Aggression Videos/From Chris/Newer Videos/RI51D_R9_106_I2U_12_19_2016_15_40_19_174_0.avi	920.900	30.0	No focal subject	1	434.052		STATE	734.135	747.684	13.549
RI51D_R9_106_I2U_12_19_2016_15_40_19_174	2019-09-24 21:07:38	E:/Aggression Videos/From Chris/Newer Videos/RI51D_R9_106_I2U_12_19_2016_15_40_19_174_0.avi	920.900	30.0	No focal subject	1	451.527		STATE	751.610	753.685	2.075
RI51D_R9_106_I2U_12_19_2016_15_40_19_174	2019-09-24 21:07:38	E:/Aggression Videos/From Chris/Newer Videos/RI51D_R9_106_I2U_12_19_2016_15_40_19_174_0.avi	920.900	30.0	No focal subject	1	460.577		STATE	760.660	772.659	11.999
RI51D_R9_106_I2U_12_19_2016_15_40_19_174	2019-09-24 21:07:38	E:/Aggression Videos/From Chris/Newer Videos/RI51D_R9_106_I2U_12_19_2016_15_40_19_174_0.avi	920.900	30.0	No focal subject	6	476.302		STATE	776.385	780.359	3.974
RI51D_R9_106_I2U_12_19_2016_15_40_19_174	2019-09-24 21:07:38	E:/Aggression Videos/From Chris/Newer Videos/RI51D_R9_106_I2U_12_19_2016_15_40_19_174_0.avi	920.900	30.0	No focal subject	1	490.36		STATE	790.443	796.722	6.279
RI51D_R9_106_I2U_12_19_2016_15_40_19_174	2019-09-24 21:07:38	E:/Aggression Videos/From Chris/Newer Videos/RI51D_R9_106_I2U_12_19_2016_15_40_19_174_0.avi	920.900	30.0	No focal subject	1	499.276		STATE	799.359	803.867	4.508
RI51D_R9_106_I2U_12_19_2016_15_40_19_174	2019-09-24 21:07:38	E:/Aggression Videos/From Chris/Newer Videos/RI51D_R9_106_I2U_12_19_2016_15_40_19_174_0.avi	920.900	30.0	No focal subject	6	509.406		STATE	809.489	818.268	8.779
RI51D_R9_106_I2U_12_19_2016_15_40_19_174	2019-09-24 21:07:38	E:/Aggression Videos/From Chris/Newer Videos/RI51D_R9_106_I2U_12_19_2016_15_40_19_174_0.avi	920.900	30.0	No focal subject	6	522.61		STATE	822.693	826.066	3.373
RI51D_R9_106_I2U_12_19_2016_15_40_19_174	2019-09-24 21:07:38	E:/Aggression Videos/From Chris/Newer Videos/RI51D_R9_106_I2U_12_19_2016_15_40_19_174_0.avi	920.900	30.0	No focal subject	8	540.36		STATE	840.443	899.967	59.524
RI51D_R9_106_I2U_12_19_2016_15_40_19_174	2019-09-24 21:07:38	E:/Aggression Videos/From Chris/Newer Videos/RI51D_R9_106_I2U_12_19_2016_15_40_19_174_0.avi	920.900	30.0	No focal subject	1	544.501		STATE	844.584	846.893	2.309
RI51D_R9_106_I2U_12_19_2016_15_40_19_174	2019-09-24 21:07:38	E:/Aggression Videos/From Chris/Newer Videos/RI51D_R9_106_I2U_12_19_2016_15_40_19_174_0.avi	920.900	30.0	No focal subject	1	556.373		STATE	856.456	860.140	3.684
RI51D_R9_106_I2U_12_19_2016_15_40_19_174	2019-09-24 21:07:38	E:/Aggression Videos/From Chris/Newer Videos/RI51D_R9_106_I2U_12_19_2016_15_40_19_174_0.avi	920.900	30.0	No focal subject	6	568.084		STATE	868.167	877.467	9.300
RI51D_R9_106_I2U_12_19_2016_15_40_19_174	2019-09-24 21:07:38	E:/Aggression Videos/From Chris/Newer Videos/RI51D_R9_106_I2U_12_19_2016_15_40_19_174_0.avi	920.900	30.0	No focal subject	1	582.31		STATE	882.393	885.443	3.050
RI51D_R9_106_I2U_12_19_2016_15_40_19_174	2019-09-24 21:07:38	E:/Aggression Videos/From Chris/Newer Videos/RI51D_R9_106_I2U_12_19_2016_15_40_19_174_0.avi	920.900	30.0	No focal subject	1	590.209		STATE	890.292	920.000	29.708
